# Supplementary material for: Distinct pathways drive anterior hypoblast specification in the implanting human embryo
Source: Nat Cell Biol. 2024 Mar 5;26(3):353–65. doi: 10.1038/s41556-024-01367-1 (PMC10940163; doi:10.1038/s41556-024-01367-1)
Supplement: Supplementary file 5 — Statistical source data. [file 41556_2024_1367_MOESM5_ESM.xlsx]

## Sheet: Fig. 2b
Fig. 2b	SMAD2.3. in Segregating Blastocysts
ICM-nuc	TE-nuc	ICM-cyto	TE-cyto	ICM-n/c	TE-n/c
71.442	30	58.4323	16.7095	1.22264	1.79539
85.585	38.443	58.2109	26.2718	1.47026	1.46328
94.958	25.801	94.2017	17.9787	1.00803	1.43509
90.164	59.366	97.1758	44.7089	0.927844	1.32783
92.268	69.748	97.5811	50.6637	0.945552	1.37669
119.981	75.687	78.2925	55.5491	1.53247	1.36252
104.411	45.083	96.7305	23.0191	1.0794	1.95851
113.997	40.064	71.3239	21.8267	1.5983	1.83555
111.674	52.178	85.7434	9.10637	1.30242	5.72984
137.116	88.485	119.288	42.3086	1.14945	2.09142
109.315	80.303	79.0472	48.6657	1.38291	1.6501
90.835	57.486	50.2578	26.9696	1.80738	2.13151
91.55	54.706	68.857	17.3237	1.32957	3.15787
95.101	62.78	72.7677	36.5126	1.30691	1.71941
87.962	100.405	74.148	49.5762	1.1863	2.02527
105.26	96.811	55.2158	39.7512	1.90634	2.43543
102.458	90.084	60.4193	52.4928	1.69578	1.71612
91.872	114.148	72.883	57.306	1.26054	1.9919
122.697	93.802	86.4871	44.3895	1.41867	2.11316
110.958	119.228	96.1687	53.9828	1.15379	2.20863
89.683	62.44	76.9033	25.8173	1.16618	2.41853
122.286	91.385	83.7525	49.1709	1.46009	1.85852
115.355	66.153	73.3336	29.0901	1.57302	2.27407
94.119	73.748	72.4094	36.4536	1.29982	2.02306
80.092	57.233	58.2935	25.4205	1.37394	2.25145
112.126	59.342	60.0064	32.2319	1.86857	1.8411
58.712	81.122	45.7484	40.0987	1.28337	2.02306
61.309	103.505	45.4592	42.0865	1.34866	2.45934
83.142	80.433	40.8239	48.0495	2.0366	1.67396
78.129	50.043	64.5464	27.2741	1.21043	1.83482
89.597	48.588	79.1101	26.3685	1.13256	1.84266
91.445		63.3836		1.44272
77.746		60.6683		1.28149
66.605		47.1228		1.41343

## Sheet: Fig. 2c
Fig. 2c	SMAD2.3. in Segregated Blastocysts
EPI-nuc	HYPO-nuc	TE-nuc	EPI-cyto	HYPO-cyto	TE-cyto	EPI-n/c	HYPO-n/c	TE-n/c
33.942	81.965	89.921	32.2624	63.388	88.6517	1.05206	1.29307	1.01432
55.672	70.939	94.495	44.3314	66.6693	53.2881	1.25581	1.06404	1.77329
49.167	94.608	45.694	45.3731	65.8579	31.1541	1.08362	1.43655	1.46671
39.949	65.758	73	39.7813	37.6314	43.3248	1.00422	1.74742	1.68495
39.522	41.817	35.079	43.4426	27.2856	19.4556	0.909752	1.53257	1.80303
38.783	39.48	50.013	44.9773	29.2696	28.7044	0.862279	1.34884	1.74235
44.636	56.726	56.362	40.8607	29.9068	40.1979	1.0924	1.89676	1.40211
69.767	43.341	50.334	61.1671	36.7318	37.3949	1.1406	1.17993	1.34601
55.418	90.391	89.268	53.5262	72.6227	53.102	1.03534	1.24467	1.68107
56.479	66.742	65.943	58.4245	51.6964	43.4334	0.9667	1.29104	1.51825
49.398	77.115	59.538	45.7398	50.7886	44.101	1.07998	1.51835	1.35004
52.744	59.402	60.792	49.6175	54.7983	42.1518	1.06301	1.08401	1.44222
84.033	60.409	99.234	62.793	41.6588	45.8659	1.33825	1.45009	2.16357
67.391	77.4		65.1586	62.1351		1.03426	1.24567
55.435	66.159		43.3119	52.9929		1.2799	1.24845
33.218	90.512		32.9809	70.2548		1.00719	1.28834
53.645	82.542		47.2119	62.7375		1.13626	1.31567
47.568	57.525		37.5006	53.88		1.26846	1.06765
39.909	90.104		41.305	57.0626		0.966203	1.57904
73.01	40.066		65.2116	30.5929		1.11959	1.30965
52.326	75.592		51.794	77.9251		1.01027	0.97006
56.212	44.153		52.5991	38.1083		1.06869	1.15862
54.267	39.648		64.7249	30.4007		0.838426	1.30418
87.747	37.75		99.1682	28.4395		0.88483	1.32738
75.266	52.92		67.5339	42.3371		1.11449	1.24997
65.052	56.509		66.4864	44.7636		0.978426	1.26239
	75.333			61.1609			1.23172
	71.59			72.3333			0.989724
	67.853			59.8807			1.13314
	67.789			60.2512			1.12511
	66.574			54.7991			1.21487

## Sheet: Fig. 2e
Fig. 2e	SMAD2.3. at Day 7
EPI-nuc	HYPO-nuc	EPI-cyto	HYPO-cyto	EPI-n/c	HYPO-n/c
34.69	69.646	44.5525	61.8738	0.778631	1.12561
29.221	59.125	29.3393	63.8853	0.995967	0.925487
37.279	69.048	35.134	43.0892	1.06105	1.60244
35.587	55.026	124.029	44.3906	0.286926	1.23959
34.721	58.112	126.698	65.4724	0.274045	0.887581
37.471	46.281	71.4289	19.7953	0.524592	2.33798
32.898	149.504	44.8442	62.6625	0.733606	2.38586
32.327	133.423	37.3214	58.1492	0.866179	2.29449
33.715	118.956	42.4586	112.562	0.794068	1.0568
28.296	59.403	39.6738	55.154	0.713216	1.07704
34.757	95.002	38.3588	92.7196	0.906103	1.02462
23.639	86.481	19.8767	65.1948	1.18928	1.3265
30.165	83.442	36.54	58.8994	0.825534	1.41669
31.694	98.952	37.0399	62.9837	0.855671	1.57107
28.564	98.101	31.638	87.395	0.902839	1.1225
26.951	106.526	21.3179	79.2911	1.26424	1.34348
30.258	52.761	12.6693	44.4682	2.38828	1.18649
34.917	97.216	36.5071	57.1269	0.956444	1.70176
25.366	94.687	27.3768	90.7334	0.926551	1.04357
32.91	74.899	33.494	52.2186	0.982564	1.43433
25.401	93.631	29.8264	61.0761	0.851629	1.53302
30.189	90.928	34.3881	117.379	0.877891	0.774651
29.01	90.387	30.6658	88.6197	0.946006	1.01994
29.653	115.064	36.0168	94.532	0.823311	1.2172
35.359	138.913	31.9439	106.291	1.10691	1.30692
22.576	48.662	20.6163	27.019	1.09505	1.80103
24.644	63.959	20.9716	33.0695	1.17511	1.93408
26.477	73.072	22.3824	62.4865	1.18294	1.1694
22.42	77.789	21.7336	78.6626	1.03158	0.988895
24.606	75.975	25.9597	53.4369	0.947855	1.42177
20	32.818	20.292	27.2127	0.985609	1.20598
30.672	33.688	29.3692	22.6872	1.04436	1.48489
33.82	34.516	31.8533	36.0737	1.06174	0.956818
27.445	35.079	29.7337	29.9132	0.923027	1.17269
26.92	26.032	24.2885	21.7785	1.10834	1.19531
27.088	20.507	28.6426	25.7354	0.945723	0.796842
22.403	24.623	22.183	24.1955	1.00992	1.01767
23.825	22.719	26.188	20.335	0.909767	1.11724
24.335	27.153	26.6368	21.9755	0.913587	1.23561
27.122	32.28	26.2081	22.0194	1.03487	1.46598
28.411	29.122	25.5109	25.3675	1.11368	1.148
21.768	19.458	20.3617	16.4107	1.06906	1.18569
26.505	30.84	29.0069	27.4782	0.913747	1.12234
21.056	26.431	20.7143	25.5954	1.01649	1.03265
23.355	25.802	24.7659	25.6223	0.943031	1.00701
22.724	23.088	24.5544	22.5683	0.925455	1.02303
24.666	35.297	25.907	29.4516	0.952099	1.19847
23.487	36.185	24.2726	35.5902	0.967635	1.01671
24.351	35.507	23.4707	32.1565	1.0375	1.10419
24.163	31.57	25.3775	29.6008	0.952142	1.06652
20.53	32.113	20.8607	32.3479	0.984148	0.992739
35.103	26.498	39.7155	24.2405	0.883862	1.09313
44.37	28.447	45.2022	26.7653	0.981589	1.06283
39.854	30.872	45.5146	29.3528	0.875631	1.05176
32.793	29.479	39.5511	30.4707	0.82913	0.967453
38.338	39.913	46.6447	29.5287	0.821915	1.35167
43.778	38.383	50.538	37.3298	0.86624	1.02821
40.224	35.934	42.3452	25.8008	0.949907	1.39275
41.247	23.401	46.1106	22.3347	0.894522	1.04774
44.647	35.481	45.7966	31.5044	0.974897	1.12623
44.46	19.343	45.6041	17.183	0.974912	1.12571
40.561	23.374	63.3454	19.1871	0.640315	1.21821
57.88	29.014	60.9445	23.0582	0.949716	1.25829
53.083	26.436	58.3676	19.6111	0.909461	1.34801
49.328	21.221	67.6008	17.7629	0.729695	1.19468
53.624	22.792	67.9254	25.2305	0.789454	0.90335
59.904	27.546	70.0706	24.686	0.854909	1.11585
61.851	28.479	89.1206	28.9491	0.694014	0.983761
61.365	27.731	78.8916	31.4812	0.777839	0.880874
43.864	28.961	47.1412	33.0401	0.930482	0.87654
58.731	39.65	71.069	37.3015	0.826394	1.06296
47.229	40.175	66.8819	28.6499	0.706156	1.40227
73.691	20.632	80.9918	19.0496	0.909857	1.08306
55.606	32.108	55.603	29.8357	1.00005	1.07616
16.094	21.834	35.5946	14.3431	0.452147	1.52226
14.658	26.525	34.7959	26.124	0.421257	1.01535
16.962	20.651	45.2992	19.8732	0.374444	1.03914
17.541	30.712	40.4072	31.3054	0.434106	0.981045
17.692	37.079	50.2982	30.7971	0.351742	1.20398
20.031	24.254	51.4468	25.9264	0.389354	0.935494
16.126	31.853	29.5396	33.9625	0.545912	0.937886
16.327	31.687	39.625	36.3573	0.412038	0.871545
21.848	28.11	36.1001	28.577	0.605207	0.983659
20.665	17.935	35.4246	23.1204	0.583351	0.775723
21.646	18.187	31.092	20.6465	0.696191	0.880875
17.339	18.933	43.0588	15.2733	0.402682	1.23961
18.042	23.766	35.4428	20.6268	0.509045	1.15219
21.149	20.492	31.9581	17.8768	0.661772	1.14629
19.254	18.594	33.5645	16.4761	0.573642	1.12855
18.789	19.166	63.5477	12.3616	0.295668	1.55044
19.885	26.49	39.5413	18.2998	0.502892	1.44755
18.464	21.179	40.3805	15.592	0.457251	1.35833
22.775	21.686	33.5224	17.7997	0.679395	1.21833
36.755	23.221	32.8193	18.8293	1.11992	1.23324
38.274	32.824	35.9752	24.8971	1.0639	1.31838
37.887	35.809	34.5761	27.5808	1.09576	1.29833
40.265	30.387	38.3543	24.8538	1.04982	1.22263
43.392	27.901	37.6475	21.7489	1.15259	1.28287
34.333	20.896	33.971	16.9947	1.01066	1.22956
30.948	26.733	36.4981	23.1276	0.847935	1.15589
35.771	20.682	39.526	14.3725	0.905	1.439
70.115	23.117	59.6235	24.0667	1.17596	0.960537
71.01	21.999	54.1585	10.3202	1.31115	2.13164
43.304	20.139	45.4483	22.6401	0.952819	0.889527
60.214	16.207	59.1838	14.4324	1.01741	1.12296
89.888	21.168	69.7082	16.0391	1.28949	1.31977
35.634	20.308	44.4461	15.9723	0.801735	1.27146
32.9	23.022	34.7605	18.2106	0.946476	1.26421
26.589	23.169	28.0117	21.346	0.94921	1.0854
32.847	22.366	37.5932	15.7429	0.873749	1.4207
22.68	25.214	26.5211	18.8979	0.855168	1.33422
31.857	25.896	35.4849	25.8712	0.897761	1.00096
47.702	37.725	43.3369	41.7879	1.10072	0.902773
57.554	36.639	55.1345	27.1906	1.04388	1.34749
56.922	36.701	57.0981	31.584	0.996916	1.16201
34.7	33.242	37.2522	20.0477	0.931488	1.65815
49.938	32.357	51.5235	30.9505	0.969228	1.04544
38.582	35.831	39.9182	40.6099	0.966526	0.882322
58.009	40.922	70.5322	42.3414	0.822447	0.966477
32.563	34.595	34.8417	33.1728	0.934598	1.04287
37.463	31.472	38.0968	38.2419	0.983363	0.822972
22.308	31.613	23.6116	28.3728	0.944789	1.1142
26.12	55.489	28.934	40.5277	0.902745	1.36916
25.358	29.232	26.8212	25.87	0.945447	1.12996
30.065	21.963	31.7638	16.0514	0.946518	1.36829
30.155	22.981	27.0791	19.739	1.11359	1.16424
27.695	26.321	31.3959	21.8331	0.882122	1.20555
70.439	28.299	47.83	22.5625	1.4727	1.25425
32.537	26.957	28.9154	20.0056	1.12525	1.34747
51.631	25.596	63.1423	20.4329	0.817693	1.25269
72.521	37.841	54.1411	27.6777	1.33948	1.3672
64.674	23.702	60.3024	15.4908	1.07249	1.53007
80.153	23.745	76.8641	18.7151	1.04279	1.26876
75.775	39.482	71.2846	26.8481	1.06299	1.47057
89.578	44.248	66.0279	33.1509	1.35667	1.33475
83.941	46.051	46.7194	20.1819	1.7967	2.2818
66.929	49.617	55.0192	33.27	1.21647	1.49134
67.438	37.093	64.7211	25.6702	1.04198	1.44498
72.511	33.183	49.7479	25.6531	1.45757	1.29353
76.053	30.287	71.2403	18.7972	1.06756	1.61125
79.447	32.796	65.5047	23.0665	1.21284	1.4218
93.156	29.076	84.9743	19.2064	1.09628	1.51387
98.712	27.35	55.7602	26.1273	1.77029	1.0468
73.056	59.693	58.734	30.1781	1.24384	1.97802
58.877	53.417	48.2004	45.7044	1.22151	1.16875
43.588	16.42	36.2926	13.9839	1.20102	1.1742
50.344	15.699	45.4053	14.264	1.10877	1.10061
37.318	15.327	38.3937	13.3328	0.971983	1.14957
36.672	16.979	34.3617	13.9126	1.06724	1.2204
54.381	19.45	49.2521	13.6806	1.10414	1.42173
43.046	15.412	37.9535	11.085	1.13418	1.39035
38.852	14.439	37.647	12.7287	1.03201	1.13437
50.725	11.715	45.6228	9.87193	1.11183	1.1867
71.527	10.431	66.722	7.33578	1.07202	1.42193
27.756	17.501	28.9138	12.672	0.959955	1.38108
27.727	14.249	31.7799	9.17716	0.872468	1.55266
27.305	13.417	32.419	12.1607	0.842254	1.10331
30.132	13.601	32.9473	10.5165	0.914551	1.2933
30.316	12.897	32.92	10.5349	0.9209	1.22421
32.514	12.126	35.0204	10.9186	0.92843	1.11058
28.575	14.014	32.8982	12.122	0.868589	1.15608
26.296	15.899	25.4133	13.4876	1.03473	1.17879
26.447	13.204	27.2889	11.6757	0.969147	1.13089
35.292	14.29	35.8284	12.078	0.985028	1.18314
30.945	14.751	31.5097	15.1804	0.982078	0.971717
32.152	22.119	35.8874	16.7454	0.895914	1.3209
33.366	15.471	36.236	14.4629	0.920798	1.06971
30.197	58.387	31.9188	43.6216	0.946058	1.33849
31.231	45.965	32.0528	29.5285	0.974362	1.55663
24.307	44.004	23.7755	37.0041	1.02235	1.18917
30.577	53.379	33.4183	40.3335	0.914978	1.32344
23.936	43.676	28.1485	24.6462	0.850349	1.77212
36.114	53.044	34.8121	44.53	1.0374	1.1912
30.186	25.247	31.3232	16.7081	0.963695	1.51107
23.848	27.548	24.6851	15.9374	0.966088	1.72851
23.709	29.007	29.6141	12.0457	0.800597	2.40807
14.986	22.727	13.9014	11.5622	1.07802	1.96563
12.783	92.372	13.3397	43.9497	0.958267	2.10176
12.475	79.679	13.2783	34.9755	0.939505	2.27814
14.926	58.209	16.1258	34.3339	0.925597	1.69538
19.377	93.294	21.1687	34.1391	0.915361	2.73276
12.293	59.873	13.8981	38.768	0.884512	1.54439
15.439	67.427	15.4734	56.7721	0.99778	1.18768
13.393	75.07	14.4152	16.4579	0.929089	4.56133
35.176	53.769	26.1868	55.7187	1.34327	0.965008
39.437	72.773	38.9373	45.3469	1.01283	1.60481
32.591	64.658	47.8846	33.4582	0.680615	1.9325
54.505	93.252	60.384	45.4149	0.90264	2.05334
52.134	30.181	59.7971	18.0148	0.871848	1.67535
32.682	121.533	45.9447	49.9085	0.711333	2.43512
35.412	82.993	46.0916	34.9305	0.768296	2.37595
39.537	81.235	36.1662	50.4711	1.0932	1.60953
32.425	110.211	46.315	60.0117	0.700097	1.83649
40.081	79.559	47.7081	53.1857	0.84013	1.49587
52.825	40.398	66.1276	44.1421	0.798835	0.915181
36.523	79.338	40.5464	44.8839	0.90077	1.76763
48.648	70.693	60.005	37.196	0.810732	1.90055
54.89	16.24	69.3319	11.0086	0.7917	1.4752
43.776	23.37	48.7596	16.7089	0.897793	1.39866
43.208	11.421	48.1591	9.6329	0.897192	1.18562
52.374	13.74	62.4052	10.6263	0.839257	1.29302
46.349	21.397	48.3377	15.3611	0.958858	1.39294
19.1	14.784	18.6196	12.2819	1.0258	1.20372
25.29	15.599	24.0933	13.6067	1.04967	1.14642
21.172	16.828	21.5288	9.8944	0.983429	1.70076
19.093	20.608	18.3286	15.9935	1.04171	1.28852
19.574	14.124	20.0381	12.2153	0.976839	1.15626
39.15	12.033	36.5231	9.13971	1.07192	1.31656
36.555	15.942	31.8277	13.6336	1.14853	1.16931
34.446	29.509	35.4494	19.3073	0.971696	1.52839
31.14	30.058	35.8781	24.4308	0.86794	1.23033
29.93	27.522	28.7244	20.2855	1.04197	1.35674
29.066	27.596	25.074	18.6164	1.15921	1.48235
30.052	21.122	33.473	13.5259	0.897799	1.56159
23.793	27.698	20.4086	15.1679	1.16583	1.8261
26.728	19.404	27.7425	14.5211	0.963431	1.33626
20.351	17.179	23.8692	14.9146	0.852605	1.15183
20.57	19.477	23.1084	14.6332	0.890152	1.33102
21.006	15.858	20.2962	10.7428	1.03497	1.47615
21.576	14.442	23.5983	12.1062	0.914305	1.19294
26.565	18.523	25.2258	14.6903	1.05309	1.2609
24.695	18.046	27.6061	13.8241	0.89455	1.3054
38.887	22.78	46.3544	15.0983	0.838905	1.50878
34.005	32.048	32.2486	20.9413	1.05446	1.53038
40.634	28.996	43.2265	21.487	0.940026	1.34947
38.281	47.585	37.9903	21.9799	1.00765	2.16493
32.295	27.731	38.8528	23.3435	0.831214	1.18796
38.471	39.144	36.035	30.1109	1.0676	1.3
37.627	33.278	40.1128	30.9219	0.938031	1.0762
31.37	30.259	37.2849	25.8296	0.841359	1.17149
36.594	27.372	32.2743	25.4967	1.13384	1.07355
30.764	37.982	32.1507	21.956	0.956868	1.72991
32.678	22.652	34.7506	18.7937	0.940358	1.2053
23.706	25.981	34.0336	18.3174	0.696546	1.41838
34.867	32.381	40.2694	24.132	0.865844	1.34183
28.762	27.174	32.8097	26.7742	0.876632	1.01493
41.317	22.716	46.9787	19.5552	0.879483	1.16163
38.742	35.91	39.2945	23.2403	0.985939	1.54516
28.86	32.269	31.1412	24.1352	0.926746	1.33701
15.035	51.742	14.6662	36.6207	1.02514	1.41292
13.658	36.439	18.9289	25.5096	0.721541	1.42844
15.386	30.615	19.0923	27.4876	0.805874	1.11378
12.324	23.711	15.3007	19.6377	0.805451	1.20742
20.329	34.872	20.7713	26.6419	0.978707	1.30892
11.248	32.197	14.0413	26.8442	0.801066	1.1994
15.888	23.732	16.6926	16.8935	0.951797	1.40481
19.732	21.183	23.9179	19.4177	0.82499	1.09091
28.441	31.217	27.4889	21.7305	1.03463	1.43656
17.396	25.021	21.2095	23.5927	0.820198	1.06054
23.059	24.468	22.5042	18.7733	1.02465	1.30334
13.115	29.749	15.5998	19.8123	0.840717	1.50154
13.822	35.28	15.1481	19.8107	0.912457	1.78086
12.254	40.578	16.4604	23.0825	0.744454	1.75795
12.141	20.36	15.2322	17.7978	0.797062	1.14396
13.556	28.429	17.8783	18.3319	0.758238	1.55079
22.519	27.452	22.677	22.2776	0.993033	1.23227
29.371	23.049	17.7871	17.9526	1.65125	1.28388
31.11	24.461	19.4814	17.6408	1.59691	1.38661
19.372	25.329	21.9281	19.5974	0.883433	1.29247
20.224	29.46	21.9318	15.9748	0.922133	1.84415
20.087	34.404	15.0296	19.5129	1.3365	1.76314
13.674	29.428	14.5521	17.3498	0.939655	1.69616
13.702	46.181	15.7512	32.5306	0.869901	1.41962
10.853	43.204	16.0006	24.5213	0.678287	1.7619
14.524	46.113	15.9116	28.3238	0.912792	1.62806
18.865	69.629	22.1732	27.8007	0.850801	2.50458
16.665	45.737	15.1465	32.723	1.10025	1.3977
18.918	33.098	22.0356	19.3889	0.85852	1.70706
16.723	34.445	17.2497	20.944	0.969464	1.64462
17.156	24.86	17.3138	18.7213	0.990886	1.3279
21.655	29.179	20.0345	19.2454	1.08089	1.51616
18.293	32.956	18.6547	24.4595	0.980613	1.34737
13.805	25.955	14.8495	16.2483	0.929663	1.5974
13.616	30.045	13.5024	20.4439	1.00842	1.46963
13.434	43.046	15.3926	24.0633	0.872759	1.78887
11.562	29.917	13.5359	19.3634	0.854171	1.54503
16.453	35.903	16.3375	19.5784	1.00707	1.8338
13.189	39.175	13.8101	28.9843	0.955028	1.35159
13.525	16.038	13.29	39.2122	1.01768	0.409005
15.876	12.235	14.9568	35.6072	1.06146	0.343611
10.834	16.043	10.1623	22.6485	1.06609	0.708347
12.293	15.751	11.5203	13.3947	1.06707	1.17591
13.508	9.417	13.5621	7.99356	0.996012	1.17807
20.211	32.068	18.9312	29.2101	1.0676	1.09784
13.692	17.213	15.1009	14.5399	0.906698	1.18385
9.126	33.794	10.2582	36.7808	0.889631	0.918796
15.509	16.195	14.571	14.1392	1.06437	1.1454
10.11	9.688	10.8746	8.09291	0.929686	1.1971
10.884	20.515	10.8787	19.4088	1.00049	1.05699
10.241	16.03	10.664	12.6775	0.96033	1.26445
8.999	12.236	8.63497	11.5194	1.04216	1.06221
7.11	16.044	9.14392	11.0874	0.777566	1.44705
10.089	54.518	11.2056	73.2578	0.900354	0.744194
12.61	36.285	11.792	32.7951	1.06937	1.10641
11.138	36.905	9.95261	33.5876	1.1191	1.09877
11.123	81.022	13.5064	72.1213	0.823534	1.12341
10.266	57.807	12.4376	62.539	0.8254	0.924335
7.949	27.41	6.84946	18.8035	1.16053	1.45771
9.649	23.626	10.1457	22.3143	0.951044	1.05878
	39		38.2438		1.01977
	39.05		29.1699		1.33871
	52.064		44.7835		1.16257
	36.002		34.8556		1.03289
	29.278		27.7787		1.05397
	46.25		43.6634		1.05924
	41.596		41.3902		1.00497
	29.756		26.7222		1.11353
	48.713		37.9886		1.28231
	58.368		42.249		1.38152
	45.576		41.2991		1.10356
	34.823		32.4787		1.07218
	35.589		33.7875		1.05332
	13.991		15.7792		0.886674
	19.15		18.2449		1.04961
	19.066		18.4688		1.03233
	56.355		44.151		1.27641
	40.017		40.4111		0.990248
	35.089		23.5202		1.49186
	22.576		21.3976		1.05507
	25.827		21.0989		1.22409
	27.65		24.5562		1.12599
	21.023		19.1902		1.09551
	19.178		18.0584		1.062
	30.457		21.204		1.43638
	15.604		14.3257		1.08923
	20.68		16.0793		1.28612
	19.563		17.4897		1.11855
	11.829		10.5247		1.12393
	14.751		12.971		1.13723
	12.781		12.9122		0.989839
	19.421		19.773		0.982199
	29.767		23.2134		1.28232
	35.642		24.3014		1.46666
	17.936		16.9297		1.05944
	21.321		18.5008		1.15244
	13.62		11.9767		1.13721

## Sheet: Fig. 2f
Fig. 2f	SMAD2.3. at Day 9
EPI-nuc	HYPO-nuc	EPI-cyto	HYPO-cyto	EPI-n/c	HYPO-n/c
41.62	23.853	45.9026	44.2257	0.906703	0.539347
51.527	22.636	53.7015	72.5649	0.959507	0.311941
51.165	36.39	50.5647	79.7601	1.01187	0.456243
48.715	46.549	55.5962	77.0216	0.876229	0.604363
39.536	105.358	46.95	18.9915	0.842088	5.54764
48.195	76.013	35.3627	35.8022	1.36288	2.12314
54.16	89.597	52.0233	31.3617	1.04107	2.85689
13.608	116.434	43.6697	30.953	0.311612	3.76164
31.797	18.969	30.1406	21.4432	1.05496	0.884617
24.185	20.273	31.5491	19.7731	0.766584	1.02528
46.977	16.31	50.8706	15.6413	0.923461	1.04275
31.852	38.091	44.747	33.4412	0.711825	1.13904
32.277	34.581	43.9975	32.7762	0.73361	1.05506
35.433	33.941	46.4052	36.0718	0.763556	0.94093
20.986	51.66	34.0653	53.4035	0.616051	0.967352
40.218	41.562	38.4859	47.8769	1.04501	0.868101
42.205	46.703	38.5857	46.5014	1.0938	1.00433
44.526	43.847	50.1444	35.0003	0.887955	1.25276
40.292	49.192	38.0805	39.4684	1.05808	1.24636
39.519	39.567	37.6769	24.1657	1.04889	1.63732
46.415	36.998	46.7467	35.394	0.992905	1.04532
38.005	42.523	36.4055	40.2796	1.04394	1.0557
45.115	48.64	49.9533	47.4338	0.903144	1.02543
41.489	53.449	42.229	36.9367	0.982476	1.44704
47.955	43.737	44.3219	37.5514	1.08197	1.16472
35.641	54.488	40.4588	59.0951	0.88092	0.92204
50.539	38.748	47.958	64.375	1.05382	0.60191
45.506	25.021	48.9346	27.1697	0.929936	0.920917
36.748	51.995	45.133	31.2519	0.814216	1.66374
49.102	52.259	43.9632	63.5284	1.11689	0.822609
40.824	56.255	39.3014	71.0495	1.03874	0.791772
46.56	61.741	44.1672	73.0012	1.05418	0.845753
42.619	15.203	41.5784	28.4289	1.02503	0.534773
49.834	27.228	50.9392	31.2784	0.978304	0.870504
44.513	39.455	39.5226	46.4402	1.12627	0.849587
42.496	46.312	39.6305	53.4065	1.07231	0.867161
42.402	31.886	38.2744	37.9237	1.10784	0.840794
39.755	29.328	37.0276	39.3854	1.07366	0.744641
42.541	32.269	45.5332	35.2577	0.934284	0.915232
38	25.274	36.5777	32.2785	1.03888	0.782998
47.119	141.635	40.6804	32.4112	1.15827	4.36994
40.53	107.775	48.3039	76.7608	0.839062	1.40404
36.32	128.122	43.692	81.1521	0.831273	1.57879
41.561	162.783	35.9116	87.5613	1.15732	1.85907
54.278	111.051	39.4415	84.6169	1.37617	1.3124
47.719	58.442	44.8631	27.4941	1.06366	2.12562
85.343	49.064	105.082	34.0375	0.812157	1.44147
66.79	56.516	42.1324	43.9017	1.58524	1.28733
64.134	41.37	64.9637	45.8581	0.987228	0.902131
84.037	57.284	80.3452	48.4712	1.04595	1.18182
42.428	45.71	35.9885	18.9111	1.17893	2.4171
41.446	68.208	39.5995	37.9038	1.04663	1.7995
42.989	62.485	41.1498	26.2248	1.04469	2.38267
35.054	54.369	29.6397	30.0448	1.18267	1.8096
30.06	39.28	31.8998	30.9008	0.942325	1.27116
30.246	60.87	36.3552	38.151	0.831957	1.5955
32.051	51.437	36.6697	35.3749	0.874046	1.45406
32.942	45.757	37.6218	28.6556	0.875609	1.59679
13.723	44.891	14.6499	33.2626	0.936727	1.34959
15.82	32.628	19.8865	50.0419	0.795514	0.652014
11.627	37.822	16.5754	56.6429	0.701463	0.667727
10.99	67.168	12.6249	31.4849	0.8705	2.13334
17.782	53.411	13.819	36.9982	1.28678	1.44361
13.429	69.143	18.7964	39.1367	0.714447	1.76671
16.39	83.001	19.1841	42.3392	0.854353	1.96038
21.046	83.764	24.5559	50.5092	0.857063	1.65839
23.603	41.841	22.1438	37.0397	1.0659	1.12962
10.678	25.31	13.6656	34.0423	0.78138	0.743487
9.374	57.432	11.3795	44.1505	0.823766	1.30082
19.243	40.197	18.4377	31.7981	1.04367	1.26413
16.166	46.163	21.7527	35.1296	0.74317	1.31408
21.557	34.416	19.1161	26.3499	1.12769	1.30612
9.084	42.661	8.1535	34.5496	1.11412	1.23477
7.409	32.785	7.82013	32.6585	0.947427	1.00387
7.734	40.22	7.52005	32.7039	1.02845	1.22982
11.273	32.423	11.3246	28.918	0.995442	1.1212
11.924	41.301	12.2485	37.0545	0.973509	1.1146
13.513	39.762	19.7795	46.2768	0.683181	0.859221
16.958	46.917	12.8925	51.2207	1.31534	0.915977
3.623	36.757	3.35543	30.1327	1.07974	1.21984
4.09	49.275	4.44363	44.6459	0.92042	1.10369
5.596	47.3	5.98935	35.6937	0.934324	1.32516
73.48	47.239	93.2872	48.8679	0.787675	0.966668
55.792	30.367	61.8481	26.3054	0.902081	1.1544
55.274	27.039	55.9804	27.8704	0.987381	0.970171
68.917	29.082	65.2015	32.5805	1.05699	0.892619
58.785	56.464	69.7607	43.3259	0.842667	1.30324
49.356	58.478	58.8956	51.1582	0.838025	1.14308
14.542	59.037	59.0532	51.4242	0.246253	1.14804
14.799	72.928	46.283	54.2862	0.31975	1.3434
20.791	26.544	51.7484	21.2356	0.401771	1.24998
19.431	26.524	54.5638	23.8026	0.356115	1.11433
17.602	26.743	76.8152	24.534	0.229147	1.09004
27.082	22.016	136.81	18.663	0.197953	1.17966
22.532	28.433	47.3853	27.2132	0.475506	1.04482
22.088	58.717	82.3911	53.1946	0.268087	1.10382
22.335	81.572	92.173	65.8276	0.242316	1.23918
23.269	71.726	88.4516	69.6298	0.26307	1.03011
27.763	51.035	85.3597	48.2593	0.325247	1.05752
22.658	75.508	90.1522	64.8683	0.251331	1.16402
24.772	62.829	75.2165	48.8972	0.329343	1.28492
22.535	58.983	46.7863	41.2423	0.481658	1.43016
29.004	106.154	74.7379	78.7684	0.388076	1.34767
37.461	49.012	82.5107	43.3219	0.454014	1.13134
31.598	50.506	86.9054	47.1859	0.363591	1.07036
38.219	53.942	90.9831	46.0394	0.420067	1.17165
36.054	52.622	37.7908	52.1566	0.954041	1.00892
34.706	57.671	33.9393	44.4904	1.02259	1.29626
50.002	57.718	48.7356	47.522	1.02599	1.21455
48.008	40.359	46.7848	37.1962	1.02615	1.08503
18.181	26.381	17.7727	25.648	1.02297	1.02858
16.795	40.989	19.9502	32.3235	0.841846	1.26809
12.36	41.795	14.528	32.8041	0.850773	1.27408
13.196	39.996	14.4984	35.766	0.910169	1.11827
23.07	58.277	24.5656	42.1759	0.939117	1.38176
13.55	34.631	12.2186	30.1028	1.10897	1.15043
14.703	49.161	13.666	39.3061	1.07588	1.25072
17.158	22.004	19.8632	22.0228	0.863811	0.999147
13.955	31.136	13.5051	32.9173	1.03331	0.945884
20.582	28.846	25.396	27.7104	0.810443	1.04098
17.579	33.198	19.3313	34.0684	0.909356	0.974451
20.963	40.415	29.7867	32.2134	0.703772	1.2546
20.734	41.633	21.9268	14.0464	0.945602	2.96395
18.373	56.816	19.3986	41.5492	0.947129	1.36744
14.865	68.345	15.8317	36.1617	0.938939	1.88999
16.083	76.545	18.4749	48.6478	0.870532	1.57345
18.62	56.493	21.605	50.7689	0.861837	1.11275
19.172	69.412	22.6806	56.9642	0.845304	1.21852
19.455	43.683	21.4669	41.3954	0.906279	1.05526
44.776	40.123	47.5526	44.7685	0.941609	0.896233
66.06	42.834	69.1729	44.4394	0.954998	0.963874
67.775	44.122	58.7363	39.8582	1.15389	1.10697
60.807	43.698	63.9046	32.2065	0.951528	1.35681
32.795	14.189	40.2352	19.6297	0.815082	0.722833
34.599	36.307	40.2299	25.9035	0.860032	1.40162
36.224	31.654	41.8329	20.0359	0.865921	1.57986
44.967	23.871	47.0835	12.8528	0.955049	1.85726
46.864	21.973	46.3597	16.3403	1.01088	1.34471
52.283	18.752	51.2089	14.0712	1.02097	1.33265
55.747	41.082	55.9514	29.1095	0.996347	1.41129
47.34	44.649	59.6603	41.0212	0.793492	1.08844
59.933	46.79	56.1981	38.7998	1.06646	1.20593
64.567	33.171	82.2257	28.4563	0.785241	1.16568
56.205	43.372	51.1987	22.7314	1.09778	1.90802
61.372	53.52	91.2147	27.2145	0.67283	1.9666
73.352	34.35	93.674	19.7709	0.783056	1.7374
70.069	43.758	90.001	36.8723	0.778536	1.18675
35.381	50.955	46.1119	36.0779	0.767286	1.41236
38.992	42.184	48.7856	34.6643	0.799252	1.21693
39.775	59.248	45.4294	37.0317	0.875534	1.59993
39.175	57.225	57.775	42.8224	0.678061	1.33633
49.846	55.534	60.277	35.9713	0.826948	1.54384
46.665	67.666	60.1964	60.4886	0.775212	1.11866
51.399	29.199	49.1187	22.4383	1.04642	1.3013
49.272	53.776	72.2663	47.3757	0.681811	1.1351
55.48	47.526	72.5585	44.9276	0.764625	1.05784
64.17	36.876	72.9476	43.4062	0.879673	0.849555
55.553	37.103	79.5056	32.8283	0.69873	1.13021
58.196	39.394	80.1732	35.4725	0.725878	1.11055
54.28	47.964	74.3746	114.145	0.729819	0.420203
50.993	44.692	70.4862	90.1475	0.723447	0.495765
57.611	45.976	64.2975	30.9478	0.896006	1.4856
54.205	29.878	59.576	19.855	0.909846	1.50481
72.777	47.071	102.329	27.8012	0.711209	1.69313
70.404	32.532	87.6176	24.8609	0.803537	1.30856
65.899	56.932	82.094	30.2755	0.802727	1.88046
50.504	66.892	63.3696	35.5065	0.796975	1.88394
55.386	57.408	58.7408	33.5987	0.942889	1.70864
80.043	27.675	72.4607	16.3459	1.10464	1.69308
68.361	34.818	74.396	25.7922	0.91888	1.34994
51.222	60.875	71.2953	51.0986	0.718449	1.19132
45.887	59.432	48.4199	30.8834	0.947689	1.9244
68.389	49.006	67.9025	39.9254	1.00717	1.22744
50.165	46.925	71.3559	32.3935	0.703025	1.44859
43.484	38.979	57.9585	29.2834	0.75026	1.33109
49.881	60.812	59.2352	54.6206	0.842084	1.11335
57.865	45.419	59.9638	37.1397	0.964999	1.22292
82.485	60.518	113.116	44.0466	0.729207	1.37396
78.89	41.293	93.6289	26.9001	0.842582	1.53505
42.553	32.401	70.8777	25.3051	0.600372	1.28041
66.182	59.814	64.2079	42.3567	1.03075	1.41215
64.36	47.561	65.1477	43.2741	0.987909	1.09906
53.669	53.197	62.6529	37.8424	0.856609	1.40575
56.445	52.091	66.6231	41.8687	0.847228	1.24415
53.463	49.155	60.9194	40.8137	0.877602	1.20437
78.863	35.178	88.3428	24.9974	0.892693	1.40727
56.144	20.422	44.3648	21.3274	1.26551	0.957548
81.489	28.222	75.5948	17.9906	1.07797	1.56871
65.744	54.884	71.2812	35.0509	0.922319	1.56584
54.056	38.18	54.2734	26.0006	0.995995	1.46843
28.245	40.735	37.0694	25.861	0.76195	1.57515
35.453	57.173	44.8299	43.6482	0.790834	1.30986
66.688	57.207	57.2628	41.9523	1.1646	1.36362
42.152	24.177	47.7057	20.1774	0.883584	1.19822
67.92	54.951	40.1784	36.4463	1.69046	1.50772
34.04	53.376	38.2608	36.2928	0.889685	1.4707
52.084	64.573	43.8641	56.9899	1.18739	1.13306
	55.809		40.8146		1.36738
	55.312		39.411		1.40347
	19.552		13.4		1.45911
	21.207		15.4219		1.37513
	26.639		24.9694		1.06687
	46.177		35.9498		1.28449
	26.2		20.7113		1.26501
	36.714		26.6846		1.37585
	48.558		41.8674		1.1598
	50.253		44.5913		1.12697
	46.348		36.7028		1.26279
	46.03		33.8951		1.35801
	43.431		50.4808		0.860346
	85.822		77.6502		1.10524
	67.852		57.1221		1.18784
	67.129		63.8339		1.05162
	55.528		52.2825		1.06208
	60.082		56.7704		1.05833
	71.564		64.2088		1.11455
	52.044		60.2517		0.863777
	38.032		33.5699		1.13292

## Sheet: Fig. 2g
Fig. 2g	SMAD2.3. in Epiblast over time
D5	D6	D7	D9
1.22264	1.05206	0.778631	0.906703
1.47026	1.25581	0.995967	0.959507
1.00803	1.08362	1.06105	1.01187
0.927844	1.00422	0.286926	0.876229
0.945552	0.909752	0.274045	0.842088
1.53247	0.862279	0.524592	1.36288
1.0794	1.0924	0.733606	1.04107
1.5983	1.1406	0.866179	0.311612
1.30242	1.03534	0.794068	1.05496
1.14945	0.9667	0.713216	0.766584
1.38291	1.07998	0.906103	0.923461
	1.06301	1.18928	0.711825
	1.33825	0.825534	0.73361
	1.03426	0.855671	0.763556
	1.2799	0.902839	0.616051
	1.00719	1.26424	1.04501
	1.13626	2.38828	1.0938
	1.26846	0.956444	0.887955
	0.966203	0.926551	1.05808
	1.11959	0.982564	1.04889
	1.01027	0.851629	0.992905
	1.06869	0.877891	1.04394
	0.838426	0.946006	0.903144
	0.88483	0.823311	0.982476
	1.11449	1.10691	1.08197
	0.978426	1.09505	0.88092
		1.17511	1.05382
		1.18294	0.929936
		1.03158	0.814216
		0.947855	1.11689
		0.985609	1.03874
		1.04436	1.05418
		1.06174	1.02503
		0.923027	0.978304
		1.10834	1.12627
		0.945723	1.07231
		1.00992	1.10784
		0.909767	1.07366
		0.913587	0.934284
		1.03487	1.03888
		1.11368	1.15827
		1.06906	0.839062
		0.913747	0.831273
		1.01649	1.15732
		0.943031	1.37617
		0.925455	1.06366
		0.952099	0.812157
		0.967635	1.58524
		1.0375	0.987228
		0.952142	1.04595
		0.984148	1.17893
		0.883862	1.04663
		0.981589	1.04469
		0.875631	1.18267
		0.82913	0.942325
		0.821915	0.831957
		0.86624	0.874046
		0.949907	0.875609
		0.894522	0.936727
		0.974897	0.795514
		0.974912	0.701463
		0.640315	0.8705
		0.949716	1.28678
		0.909461	0.714447
		0.729695	0.854353
		0.789454	0.857063
		0.854909	1.0659
		0.694014	0.78138
		0.777839	0.823766
		0.930482	1.04367
		0.826394	0.74317
		0.706156	1.12769
		0.909857	1.11412
		1.00005	0.947427
		0.452147	1.02845
		0.421257	0.995442
		0.374444	0.973509
		0.434106	0.683181
		0.351742	1.31534
		0.389354	1.07974
		0.545912	0.92042
		0.412038	0.934324
		0.605207	0.787675
		0.583351	0.902081
		0.696191	0.987381
		0.402682	1.05699
		0.509045	0.842667
		0.661772	0.838025
		0.573642	0.246253
		0.295668	0.31975
		0.502892	0.401771
		0.457251	0.356115
		0.679395	0.229147
		1.11992	0.197953
		1.0639	0.475506
		1.09576	0.268087
		1.04982	0.242316
		1.15259	0.26307
		1.01066	0.325247
		0.847935	0.251331
		0.905	0.329343
		1.17596	0.481658
		1.31115	0.388076
		0.952819	0.454014
		1.01741	0.363591
		1.28949	0.420067
		0.801735	0.954041
		0.946476	1.02259
		0.94921	1.02599
		0.873749	1.02615
		0.855168	1.02297
		0.897761	0.841846
		1.10072	0.850773
		1.04388	0.910169
		0.996916	0.939117
		0.931488	1.10897
		0.969228	1.07588
		0.966526	0.863811
		0.822447	1.03331
		0.934598	0.810443
		0.983363	0.909356
		0.944789	0.703772
		0.902745	0.945602
		0.945447	0.947129
		0.946518	0.938939
		1.11359	0.870532
		0.882122	0.861837
		1.4727	0.845304
		1.12525	0.906279
		0.817693	0.941609
		1.33948	0.954998
		1.07249	1.15389
		1.04279	0.951528
		1.06299	0.815082
		1.35667	0.860032
		1.7967	0.865921
		1.21647	0.955049
		1.04198	1.01088
		1.45757	1.02097
		1.06756	0.996347
		1.21284	0.793492
		1.09628	1.06646
		1.77029	0.785241
		1.24384	1.09778
		1.22151	0.67283
		1.20102	0.783056
		1.10877	0.778536
		0.971983	0.767286
		1.06724	0.799252
		1.10414	0.875534
		1.13418	0.678061
		1.03201	0.826948
		1.11183	0.775212
		1.07202	1.04642
		0.959955	0.681811
		0.872468	0.764625
		0.842254	0.879673
		0.914551	0.69873
		0.9209	0.725878
		0.92843	0.729819
		0.868589	0.723447
		1.03473	0.896006
		0.969147	0.909846
		0.985028	0.711209
		0.982078	0.803537
		0.895914	0.802727
		0.920798	0.796975
		0.946058	0.942889
		0.974362	1.10464
		1.02235	0.91888
		0.914978	0.718449
		0.850349	0.947689
		1.0374	1.00717
		0.963695	0.703025
		0.966088	0.75026
		0.800597	0.842084
		1.07802	0.964999
		0.958267	0.729207
		0.939505	0.842582
		0.925597	0.600372
		0.915361	1.03075
		0.884512	0.987909
		0.99778	0.856609
		0.929089	0.847228
		1.34327	0.877602
		1.01283	0.892693
		0.680615	1.26551
		0.90264	1.07797
		0.871848	0.922319
		0.711333	0.995995
		0.768296	0.76195
		1.0932	0.790834
		0.700097	1.1646
		0.84013	0.883584
		0.798835	1.69046
		0.90077	0.889685
		0.810732	1.18739
		0.7917
		0.897793
		0.897192
		0.839257
		0.958858
		1.0258
		1.04967
		0.983429
		1.04171
		0.976839
		1.07192
		1.14853
		0.971696
		0.86794
		1.04197
		1.15921
		0.897799
		1.16583
		0.963431
		0.852605
		0.890152
		1.03497
		0.914305
		1.05309
		0.89455
		0.838905
		1.05446
		0.940026
		1.00765
		0.831214
		1.0676
		0.938031
		0.841359
		1.13384
		0.956868
		0.940358
		0.696546
		0.865844
		0.876632
		0.879483
		0.985939
		0.926746
		1.02514
		0.721541
		0.805874
		0.805451
		0.978707
		0.801066
		0.951797
		0.82499
		1.03463
		0.820198
		1.02465
		0.840717
		0.912457
		0.744454
		0.797062
		0.758238
		0.993033
		1.65125
		1.59691
		0.883433
		0.922133
		1.3365
		0.939655
		0.869901
		0.678287
		0.912792
		0.850801
		1.10025
		0.85852
		0.969464
		0.990886
		1.08089
		0.980613
		0.929663
		1.00842
		0.872759
		0.854171
		1.00707
		0.955028
		1.01768
		1.06146
		1.06609
		1.06707
		0.996012
		1.0676
		0.906698
		0.889631
		1.06437
		0.929686
		1.00049
		0.96033
		1.04216
		0.777566
		0.900354
		1.06937
		1.1191
		0.823534
		0.8254
		1.16053
		0.951044

## Sheet: Fig. 2h
Fig. 2h	SMAD2.3. in Hypoblast over time
D5	D6	D7	D9
1.80738	1.74742	1.12561	0.539347
1.32957	1.53257	0.925487	0.311941
1.30691	1.34884	1.60244	0.456243
1.1863	1.89676	1.23959	0.604363
1.90634	1.17993	0.887581	5.54764
1.69578	1.30965	2.33798	2.12314
1.26054	0.97006	2.38586	2.85689
1.41867	1.15862	2.29449	3.76164
1.15379	1.30418	1.0568	0.884617
1.16618	1.32738	1.07704	1.02528
	1.24997	1.02462	1.04275
	1.26239	1.3265	1.13904
	1.23172	1.41669	1.05506
	0.989724	1.57107	0.94093
	1.13314	1.1225	0.967352
	1.12511	1.34348	0.868101
	1.21487	1.18649	1.00433
	1.29307	1.70176	1.25276
	1.06404	1.04357	1.24636
	1.43655	1.43433	1.63732
	1.24467	1.53302	1.04532
	1.29104	0.774651	1.0557
	1.51835	1.01994	1.02543
	1.08401	1.2172	1.44704
	1.45009	1.30692	1.16472
	1.24567	1.80103	0.92204
	1.24845	1.93408	0.60191
	1.28834	1.1694	0.920917
	1.31567	0.988895	1.66374
	1.06765	1.42177	0.822609
	1.57904	1.20598	0.791772
		1.48489	0.845753
		0.956818	0.534773
		1.17269	0.870504
		1.19531	0.849587
		0.796842	0.867161
		1.01767	0.840794
		1.11724	0.744641
		1.23561	0.915232
		1.46598	0.782998
		1.148	4.36994
		1.18569	1.40404
		1.12234	1.57879
		1.03265	1.85907
		1.00701	1.3124
		1.02303	1.18182
		1.19847	2.4171
		1.01671	1.7995
		1.10419	2.38267
		1.06652	1.8096
		0.992739	1.27116
		1.09313	1.5955
		1.06283	1.45406
		1.05176	1.59679
		0.967453	1.34959
		1.35167	0.652014
		1.02821	0.667727
		1.39275	2.13334
		1.04774	1.44361
		1.12623	1.76671
		1.12571	1.96038
		1.21821	1.65839
		1.25829	1.12962
		1.34801	0.743487
		1.19468	1.30082
		0.90335	1.26413
		1.11585	1.31408
		0.983761	1.30612
		0.880874	1.23477
		0.87654	1.00387
		1.06296	1.22982
		1.40227	1.1212
		1.08306	1.1146
		1.07616	0.859221
		1.52226	0.915977
		1.01535	1.21984
		1.03914	1.10369
		0.981045	1.32516
		1.20398	0.966668
		0.935494	1.1544
		0.937886	0.970171
		0.871545	0.892619
		0.983659	1.30324
		0.775723	1.14308
		0.880875	1.14804
		1.23961	1.3434
		1.15219	1.24998
		1.14629	1.11433
		1.12855	1.09004
		1.55044	1.17966
		1.44755	1.04482
		1.35833	1.10382
		1.21833	1.23918
		1.23324	1.03011
		1.31838	1.05752
		1.29833	1.16402
		1.22263	1.28492
		1.28287	1.43016
		1.22956	1.34767
		1.15589	1.13134
		1.439	1.07036
		0.960537	1.17165
		2.13164	1.00892
		0.889527	1.29626
		1.12296	1.21455
		1.31977	1.08503
		1.27146	1.02858
		1.26421	1.26809
		1.0854	1.27408
		1.4207	1.11827
		1.33422	1.38176
		1.00096	1.15043
		0.902773	1.25072
		1.34749	0.999147
		1.16201	0.945884
		1.65815	1.04098
		1.04544	0.974451
		0.882322	1.2546
		0.966477	2.96395
		1.04287	1.36744
		0.822972	1.88999
		1.1142	1.57345
		1.36916	1.11275
		1.12996	1.21852
		1.36829	1.05526
		1.16424	0.896233
		1.20555	0.963874
		1.25425	1.10697
		1.34747	1.35681
		1.25269	0.722833
		1.3672	1.40162
		1.53007	1.57986
		1.26876	1.85726
		1.47057	1.34471
		1.33475	1.33265
		2.2818	1.41129
		1.49134	1.08844
		1.44498	1.20593
		1.29353	1.16568
		1.61125	1.90802
		1.4218	1.9666
		1.51387	1.7374
		1.0468	1.18675
		1.97802	1.41236
		1.16875	1.21693
		1.1742	1.59993
		1.10061	1.33633
		1.14957	1.54384
		1.2204	1.11866
		1.42173	1.3013
		1.39035	1.1351
		1.13437	1.05784
		1.1867	0.849555
		1.42193	1.13021
		1.38108	1.11055
		1.55266	0.420203
		1.10331	0.495765
		1.2933	1.4856
		1.22421	1.50481
		1.11058	1.69313
		1.15608	1.30856
		1.17879	1.88046
		1.13089	1.88394
		1.18314	1.70864
		0.971717	1.69308
		1.3209	1.34994
		1.06971	1.19132
		1.33849	1.9244
		1.55663	1.22744
		1.18917	1.44859
		1.32344	1.33109
		1.77212	1.11335
		1.1912	1.22292
		1.51107	1.37396
		1.72851	1.53505
		2.40807	1.28041
		1.96563	1.41215
		2.10176	1.09906
		2.27814	1.40575
		1.69538	1.24415
		2.73276	1.20437
		1.54439	1.40727
		1.18768	0.957548
		4.56133	1.56871
		0.965008	1.56584
		1.60481	1.46843
		1.9325	1.57515
		2.05334	1.30986
		1.67535	1.36362
		2.43512	1.19822
		2.37595	1.50772
		1.60953	1.4707
		1.83649	1.13306
		1.49587	1.36738
		0.915181	1.40347
		1.76763	1.45911
		1.90055	1.37513
		1.4752	1.06687
		1.39866	1.28449
		1.18562	1.26501
		1.29302	1.37585
		1.39294	1.1598
		1.20372	1.12697
		1.14642	1.26279
		1.70076	1.35801
		1.28852	0.860346
		1.15626	1.10524
		1.31656	1.18784
		1.16931	1.05162
		1.52839	1.06208
		1.23033	1.05833
		1.35674	1.11455
		1.48235	0.863777
		1.56159	1.13292
		1.8261
		1.33626
		1.15183
		1.33102
		1.47615
		1.19294
		1.2609
		1.3054
		1.50878
		1.53038
		1.34947
		2.16493
		1.18796
		1.3
		1.0762
		1.17149
		1.07355
		1.72991
		1.2053
		1.41838
		1.34183
		1.01493
		1.16163
		1.54516
		1.33701
		1.41292
		1.42844
		1.11378
		1.20742
		1.30892
		1.1994
		1.40481
		1.09091
		1.43656
		1.06054
		1.30334
		1.50154
		1.78086
		1.75795
		1.14396
		1.55079
		1.23227
		1.28388
		1.38661
		1.29247
		1.84415
		1.76314
		1.69616
		1.41962
		1.7619
		1.62806
		2.50458
		1.3977
		1.70706
		1.64462
		1.3279
		1.51616
		1.34737
		1.5974
		1.46963
		1.78887
		1.54503
		1.8338
		1.35159
		0.409005
		0.343611
		0.708347
		1.17591
		1.17807
		1.09784
		1.18385
		0.918796
		1.1454
		1.1971
		1.05699
		1.26445
		1.06221
		1.44705
		0.744194
		1.10641
		1.09877
		1.12341
		0.924335
		1.45771
		1.05878
		1.01977
		1.33871
		1.16257
		1.03289
		1.05397
		1.05924
		1.00497
		1.11353
		1.28231
		1.38152
		1.10356
		1.07218
		1.05332
		0.886674
		1.04961
		1.03233
		1.27641
		0.990248
		1.49186
		1.05507
		1.22409
		1.12599
		1.09551

## Sheet: Fig. 2i
Fig. 2i	SMAD2.3. in Hypoblast Depending on Proximity to Epiblast
D7 In Contact	D7 Not In Contact	D9 In Contact	D9 Not In Contact
1.60244	1.12561	5.54764	0.884617
1.23959	0.925487	2.12314	1.02528
0.887581	2.33798	2.85689	1.04275
1.43433	2.38586	3.76164	1.13904
1.53302	2.29449	5.54764	1.05506
1.2172	1.0568	2.12314	0.94093
1.30692	1.07704	2.85689	0.967352
1.80103	1.02462	3.76164	0.868101
1.93408	1.3265	1.25276	1.00433
1.1694	1.41669	1.24636	1.16472
0.988895	1.57107	1.63732	0.92204
1.42177	1.1225	1.04532	0.60191
1.11724	1.34348	1.0557	0.920917
1.23561	1.18649	1.02543	1.66374
1.46598	1.70176	1.44704	0.822609
1.148	1.04357	1.40404	0.791772
1.18569	0.774651	1.57879	0.845753
1.12234	1.01994	1.85907	0.534773
1.03265	1.20598	1.3124	0.870504
1.00701	1.48489	2.12562	0.849587
1.02303	0.956818	1.44147	0.867161
1.19847	1.17269	1.28733	0.840794
1.01671	1.19531	0.902131	0.744641
1.10419	0.796842	1.45406	0.915232
1.06652	1.01767	1.59679	0.782998
0.992739	0.90335	1.34959	4.36994
1.09313	1.11585	0.652014	1.18182
1.06283	0.983761	0.667727	2.4171
1.05176	0.880874	2.13334	1.7995
0.967453	0.87654	1.44361	2.38267
1.35167	1.06296	1.76671	1.8096
1.02821	1.40227	1.96038	1.27116
1.39275	1.12296	1.65839	1.5955
1.04774	1.31977	1.30324	1.12962
1.12623	1.27146	1.14308	0.743487
1.12571	1.26421	1.14804	1.30082
1.21821	1.0854	1.3434	1.26413
1.25829	1.00096	1.24998	1.31408
1.34801	0.902773	1.11433	1.30612
1.19468	1.34749	1.09004	1.23477
1.08306	1.16201	1.17966	1.00387
1.07616	1.65815	1.04482	1.22982
1.52226	1.04544	1.10382	1.1212
1.01535	0.882322	1.23918	1.1146
1.03914	0.966477	1.03011	0.859221
0.981045	1.04287	1.05752	0.915977
1.20398	0.822972	1.16402	1.21984
0.935494	1.36829	1.28492	1.10369
0.937886	1.16424	1.43016	1.32516
0.871545	1.20555	1.34767	0.966668
0.983659	1.25425	1.13134	1.1544
0.775723	1.34747	1.07036	0.970171
0.880875	1.25269	1.17165	0.892619
1.23961	1.3672	1.00892	2.96395
1.15219	1.53007	1.29626	1.36744
1.14629	1.26876	1.21455	1.88999
1.12855	1.47057	1.08503	1.57345
1.55044	1.1742	1.02858	1.11275
1.44755	1.10061	1.26809	1.21852
1.35833	1.14957	1.27408	1.05526
1.21833	1.2204	1.11827	0.896233
1.23324	1.42173	1.38176	0.963874
1.31838	1.39035	1.15043	1.10697
1.29833	1.13437	1.25072	1.35681
1.22263	1.1867	0.999147	1.3013
1.28287	1.51107	0.945884	1.1351
1.22956	1.72851	1.04098	1.05784
1.15589	2.40807	0.974451	0.849555
1.439	1.96563	1.2546	1.13021
0.960537	1.67535	0.722833	1.11055
2.13164	1.70076	1.40162	1.69308
0.889527	1.28852	1.57986	1.34994
1.4207	1.15626	1.85726	1.19132
1.33422	1.31656	1.34471	1.1598
1.1142	1.16931	1.33265	1.12697
1.36916	1.52839	1.41129	1.26279
1.12996	1.23033	1.08844	1.35801
1.33475	1.35674	1.20593	1.10524
2.2818	1.40481	1.16568	1.18784
1.49134	1.09091	1.90802	1.05162
1.44498	1.43656	1.9666	1.06208
1.29353	1.06054	1.7374	1.05833
1.61125	1.30334	1.18675	1.11455
1.4218	1.50154	1.41236	0.863777
1.51387	1.78086	1.21693	1.13292
1.0468	1.75795	1.59993
1.97802	1.14396	1.33633
1.16875	1.55079	1.54384
1.42193	1.23227	1.11866
1.38108	1.28388	0.420203
1.55266	1.38661	0.495765
1.10331	1.29247	1.4856
1.2933	1.84415	1.50481
1.22421	1.76314	1.69313
1.11058	1.69616	1.30856
1.15608	1.26445	1.88046
1.17879	1.06221	1.88394
1.13089	1.44705	1.70864
1.18314	0.744194	1.9244
0.971717	1.10641	1.22744
1.3209	1.09877	1.44859
1.06971	1.12341	1.33109
1.33849	0.924335	1.11335
1.55663	1.45771	1.22292
1.18917	1.05878	1.37396
1.32344	1.01977	1.53505
1.77212	1.33871	1.28041
1.1912	1.16257	1.41215
2.10176	1.03289	1.09906
2.27814	1.05397	1.40575
1.69538	1.05924	1.24415
2.73276	1.00497	1.20437
1.54439	1.11353	1.40727
1.18768	1.12393	0.957548
4.56133	1.13723	1.56871
0.965008	0.989839	1.56584
1.60481	0.982199	1.46843
1.9325	1.28232	1.57515
2.05334	1.46666	1.30986
2.43512	1.05944	1.36362
2.37595	1.15244	1.19822
1.60953	1.13721	1.50772
1.83649		1.4707
1.49587		1.13306
0.915181		1.36738
1.76763		1.40347
1.90055		1.45911
1.4752		1.37513
1.39866		1.06687
1.18562		1.28449
1.29302		1.26501
1.39294		1.37585
1.20372		0.860346
1.14642
1.48235
1.56159
1.8261
1.33626
1.15183
1.33102
1.47615
1.19294
1.2609
1.3054
1.50878
1.53038
1.34947
2.16493
1.18796
1.3
1.0762
1.17149
1.07355
1.72991
1.2053
1.41838
1.34183
1.01493
1.16163
1.54516
1.33701
1.41292
1.42844
1.11378
1.20742
1.30892
1.1994
1.41962
1.7619
1.62806
2.50458
1.3977
1.70706
1.64462
1.3279
1.51616
1.34737
1.5974
1.46963
1.78887
1.54503
1.8338
1.35159
0.409005
0.343611
0.708347
1.17591
1.17807
1.09784
1.18385
0.918796
1.1454
1.1971
1.05699
1.28231
1.38152
1.10356
1.07218
1.05332
0.886674
1.04961
1.03233
1.27641
0.990248
1.49186
1.05507
1.22409
1.12599
1.09551
1.062
1.43638
1.08923
1.28612
1.11855
