# Supplementary material for: Distinct pathways drive anterior hypoblast specification in the implanting human embryo
Source: Nat Cell Biol. 2024 Mar 5;26(3):353–65. doi: 10.1038/s41556-024-01367-1 (PMC10940163; doi:10.1038/s41556-024-01367-1)
Supplement: Supplementary file 6 — Statistical source data. [file 41556_2024_1367_MOESM6_ESM.xlsx]

## Sheet: Fig. 3c
Fig. 3c	Day 5-7 Epiblast cells
Control	A83	ActA-25
16	11	26
10	32	17
32	29	32
13	12	33
13	0	24
57	17	13
28	14	13
29	22	0
7	0	64
27	11	6
16	19	20
16	33	0
20		8
14		70
4
3
12
9
56
31
27
9
32
40
10
27
17
54
19
11
6
4
4
13
14
44
1
31
30
14
52
19
0
33

## Sheet: Fig. 3d
Fig. 3d	Day 5-7 Hypoblast cells
Control	A83	ActA-25
	26
22	46	25
35	19
17	26	45
21	0	48
22	64	39
22	28	45
2	29	15
32	43	40
27	38	21
34	38	22
2	55	7
61		31
33		31
19
12
32
16
42
52
64
13
88
32
38
84
42
41
28
9
16
11
36
35
14
28
5
58
70
23
61
24
19
92

## Sheet: Fig. 3e
Fig. 3e	Day 5-7 CER1 cells
Control	A83	ActA-25
0	3	1
0	0	10
11	0	7
6	0	10
8		3
0	1	2
0	0	2
13	2	7
3	1	3
5	1	4
2	1	0
7	2	3
6		5
5
0
0
1
0
8
3
0
1
2
4
4
0
3
2
6
3
1
1
2
2
2
4
0
2
3
1
4
2
0
10

## Sheet: Fig. 3h
Fig. 3h	Day 7-9 Epiblast cells
Control	A83	ActA-25
6	3	14
15	38	5
5	3	4
3	19	6
20	10	14
9	9	2
14	65	28
0	30	13
32	3	5
8	5	0
0	6	2
1	10	0
1		8
11		77
3		27
12
13
0
0
8
4
7
36
28
35
39
4
89
44
10
7
27
0
47
9
32
34
4
11

## Sheet: Fig. 3i
Fig. 3i	Day 7-9 Hypoblast cells
Control	A83	ActA-25
0	1	23
64	35	43
27	53	3
15	24	15
		20
17	24
5		50
2	28	79
	25	9
0	18	14
51	17	11
12	35	2
18		16
		24
25		13
22
10
1
6
11
9
13
69
22
65
69
30
47
81
19
32
11
0
40
25
70
112
23
45

## Sheet: Fig. 3j
Fig. 3j	Day 7-9 CER1 cells
Control	A83	ActA-25
	0	0
0	1	3
0	0	23
0	0	3
0	0	2
14	0
2	0	6
	0	9
0	0	0
3	0	0
0	0	15
0	1	0
2		2
		8
1		2
2
0
0
7
6
15
6
7
8
4
4
10
3
5
2
3
0
3
2
2
2

## Sheet: Fig. 3l
Fig. 3l	GATA6 levels in YSLCs
Day 2-4			Day 4-6
Control	A83		Control	A83
0.003073	0.141407		0.402679	0.003389
0.004778	0.32695		0.318643	0.004577
0.058606	0.004226		0.67459	0.005928
1.54383	0.294814		1.17582	0.006046
1.35068	0.026613		0.067084	0.008643
0.16462	0.026382		3.10359	0.006453
4.53659	0.164737		1.72564	0.002012
2.16924	0.024122		2.29227	0.00143
5.39496	0.461392		0.496418	0.090763
2.41311	0.121951		0.289381	0.05307
0.002784	0.005618		2.35703	0.215304
1.17783	0.009686		3.12455	0.007918
0.004085	0.012181		0.731451	0.004234
0.930702	0.029304		0.055767	0.011265
2.8624	0.012958		0.315272	0.007335
0.959668	0.032226		4.09407	0.014144
0.003772	0.103516		0.342188	0.013621
0.005098	0.325057		0.474248	0.012529
2.31836	0.083018		1.17643	0.010334
3.1172	0.007858		2.7197	0.062079
0.004747	0.167312		0.388642	0.010452
0.063945	0.264004		0.290317	0.025892
1.92618	0.021967		0.316981	0.00192
0.04424	0.012259		0.275882	0.003405
5.44468	0.248306		0.604561	0.056527
0.182221	0.309098		1.24239	0.189075
1.34998	0.010418		1.38508	0.028315
0.010557	0.008627		0.580517	0.008924
0.024487	0.005743		1.13569	0.004367
0.980588	0.006223		1.87944	0.002554
1.80364	0.205745		2.46771	0.042586
4.85451	0.009615		0.828451	0.006623
0.213425	0.089718		0.136884	0.021698
0.004174	0.008084		0.56719	0.004221
1.33104	0.80475		1.00215	0.000916
0.002725	0.005427		0.143309	0.001248
0.004268	0.020712		0.650242	0.010468
0.129878	0.005494		0.497578	0.111472
0.047284	0.011042		0.466802	0.126771
0.748725	0.011812		3.90798	0.198403
1.79598	0.022353		3.24532	1.03619
0.008692	0.394351		0.589678	0.001777
0.005382	0.192136		1.2338	0.021782
1.61418	0.005733		5.56035	0.108478
3.03039	0.022801		0.165232	0.003144
0.003633	0.010408		0.216248	0.008198
0.008502	0.011743		0.212717	0.002066
0.002345	0.016335		0.067035	0.024952
1.11056	0.005868		0.412244	0.001142
1.4975	0.010832		0.69506	0.022
4.47341	0.015099		1.38339	0.008967
0.01777	0.813729		2.05224	0.002201
0.640579	0.501825		0.003422	0.105711
4.31794	1.3691		0.35048	0.01777
1.50487	0.29221		0.471864	0.244002
0.002889	0.042779		0.225048	0.030429
0.005989	1.07264		0.217212	0.129114
0.009087	0.017964		0.307722	0.019905
0.009126	0.008125		0.128047	0.001086
1.41406	0.005397		1.60989	0.0012
0.012527	0.013304		1.66355	0.045722
0.606898	0.012412		2.51896	0.008917
1.48998	0.005923		0.22984	0.029768
0.39886	0.006667		0.133639	0.263909
0.003767	0.005304		0.523715	0.027104
0.002063	0.007402		0.153225	0.011163
0.642719	0.008245		0.132526	0.001301
4.09037	0.005761		2.30331	0.004918
0.33867	0.006612		0.016327	0.002062
0.171654	0.006041		5.08685	0.002926
4.89756	0.005454		0.199625	0.009988
0.153877	0.050953		0.624283	0.004493
0.004147	0.007123		0.652843	0.201346
1.52947	0.006044		1.27426	0.123263
2.25834	0.012344		2.09097	0.508163
3.0173	0.214919		0.276476	0.048751
1.48007	0.011169		2.63354	0.109096
0.003202	0.007409		0.117175	1.21252
0.005683	0.082394		2.519	1.20517
3.81795	0.280461		0.42034	0.189983
1.59294	0.007976		0.218337	0.048456
1.12286	0.007085		1.93556	0.476951
0.044461	0.117		0.38297	0.002443
3.20019	0.00432		0.877135	0.001854
0.0052	0.342371		0.393271	0.205125
4.2645	0.007572		0.168904	0.04879
0.695543	0.011441		3.38759	0.030565
0.167754	0.013646		0.561508	0.780393
2.91603	0.272408		0.945237	0.75332
0.005461	0.30673		2.24876	0.005429
0.090136	0.016088		4.09351	0.079947
0.914055	0.211277		1.2704	0.001781
1.24985	0.12749		0.282211	0.040047
2.47992	0.012224		4.07201	0.029774
0.003788	0.010882		5.36332	0.147578
1.77108	0.027542		0.25796	0.376623
1.60348	0.141646		1.53559	0.566283
0.170878	0.052049		0.926014	0.744282
1.60304	0.042064		6.94205	0.545697
1.83391	0.470341		0.978048	0.030758
0.003479	0.187071		0.697039	0.239175
1.35499	0.225004		0.875462	0.278487
0.573508	0.232356		2.5876	0.008264
0.076924	0.138374		0.732296	0.208655
0.006528	0.252856		0.910211	0.100997
0.258976	0.067452		1.20736	0.0142
5.98183	0.05878		0.521679	0.28432
0.65161	0.176498		1.33091	0.107154
1.48817	0.07285		0.414326	0.236488
4.14615	0.229308		0.004482	0.583073
0.659375	0.143999		0.178545	0.369368
2.00672	0.417049		1.40911	0.025939
0.736113	0.11503		0.679405	0.699453
1.01589	1.11556		0.885041	0.023862
1.09875	0.098637		1.76694	0.077506
0.022716	0.53186		1.66408	0.469929
1.04917	0.314554		0.121054	0.920461
0.724879	0.299954		4.42201	0.751708
7.78627	0.210016		0.251926	0.443217
3.83465	0.136425		4.10295	0.187794
3.75628	0.136599		0.559362	0.640894
2.3447	0.517221		0.73056	0.264629
0.032281	0.258209		6.73213	0.031273
2.13128	0.184962		0.070559	0.055582
1.78696	0.578211		0.146053	0.040668
6.80674	0.452045		1.36894	0.648458
0.614339	0.136804		4.93026	0.980309
0.013347	0.132957		1.5652	0.232589
0.489471	0.090506		0.124251	0.554257
0.352329	0.432216		1.24051	0.338735
2.01272	0.208822		0.439356	0.528246
3.96842	0.112617		1.49936	0.065136
1.854	0.135215		3.94195	0.394162
3.6316	0.115695		0.904113	0.377733
1.39688	0.76576		1.64332	0.022744
0.485346	0.504996		0.807258	0.042789
0.887031	0.635379		1.26642	0.473199
0.671042	0.495185		0.325945	0.171827
3.1275	0.395091		1.83503	0.561907
0.080728	0.702067		0.786826	0.01038
3.21977	0.160498		1.62001	0.727462
1.24464	0.301448		1.23291	0.170006
1.15073	0.232752		0.996775	0.164681
0.420447	0.303124		0.795234	0.202366
1.16202	0.205682		2.16202	0.015842
2.91956	0.079788		1.48756	0.061957
7.10165	0.643874		0.166794	0.115438
4.06122	0.412751		0.887244	0.058929
5.14257	0.3423		1.0303	0.009731
3.23901	0.570962		0.923462	0.039716
0.493376	0.053341		0.012884	1.02039
0.611462	0.203387		1.10126	0.490231
2.58973	0.066677		2.1519	0.938135
1.54137	0.123612		3.52937	0.044246
2.3973	0.577675		0.384982	0.410594
0.175808	0.143455		2.89714	0.302275
3.36321	0.246812		2.62155	0.482786
0.539623	0.178449		0.001739	0.450327
1.00194	0.35833		1.04231	0.24647
5.13084	0.38843		3.79859	0.491691
2.71272	0.524322		3.7787	0.077375
0.131615	0.283907		4.10603	0.139725
0.504905	0.600351		2.79474	0.005865
1.25868	0.848609		0.507955	0.138636
5.66624	0.155512		0.221789	0.08691
3.03829	0.187651		0.981694	0.041539
0.649418	0.02017		3.32682	0.112795
1.13975	0.347103		0.870452	0.764475
3.04848	0.310954		4.60575	0.439609
1.63079	0.152199		2.86622	0.122096
1.49963	0.941008		2.33806	0.044402
2.3429	0.784772		0.517717	0.274095
1.14011	0.153186		0.324701	0.038918
3.97107	0.345136		1.69768	0.007011
0.485728	0.157123		5.12757	0.066924
0.30667	0.202563		1.60975	0.095359
0.319575	0.171656		0.962942	0.058615
0.244038	0.102057		0.02231	0.863182
0.782215	0.843879		2.38811	0.068243
0.972951	0.621778		0.020278	0.067116
0.226556	0.971487		0.079217	0.069242
2.16564	0.057538		0.612536	0.496094
0.432461	0.040323		0.246283	0.06572
0.204061	0.966955		0.01084	0.159172
0.065978	0.386124		0.018414	0.02946
0.126227	0.250534		0.063534	0.279382
1.08317	0.200683		1.64575	0.064384
0.404937	1.34143		0.28944	0.523044
0.142091	0.538561		0.56641	0.011122
1.68931	0.39591		0.020853	0.053128
0.296337	1.44307		0.051283	0.359937
0.017106	0.180387		0.059149	0.075913
0.676316	0.343317		0.022903	0.038809
0.376385	1.4835		0.026132	0.070482
1.19563	0.708094		0.185657	0.079318
0.156178	0.221612		0.119817	0.035172
0.002688	0.627206		0.05265	0.18011
0.150729	0.259633		3.70364	0.003723
0.324266	0.492071		0.51496	0.032656
0.50666	0.357206		0.108239	0.368698
0.601065	0.007469		0.259469	0.052601
0.976572	0.332335		1.29342	0.057143
0.84103	0.347309		1.8715	0.010875
1.86731	0.330167		3.08721	0.080427
3.16193	0.021127		1.21019	0.15176
1.77672	0.826027		0.529364	0.061694
0.036526	0.003587		0.889564	0.642024
0.008799	0.903457		1.53648	0.004674
0.442922	0.06641		0.341136	0.056622
1.30894	1.5015		0.04025	0.11525
0.923617	0.006734		1.25197	0.035933
2.75145	0.344638		4.3254	0.131342
2.16493	0.33244		5.51331	0.32069
0.533546	0.185359		1.90748	0.465006
0.099621	0.011258		1.42482	0.497489
0.598312	0.360053		0.364389	0.113708
0.518908	0.008713		0.658123	0.952453
3.75683	0.265453		0.931496	0.119756
4.31096	0.011075		4.03649	0.611258
0.406261	0.010571		0.617323	0.059094
0.074812	0.164263		1.69205	0.671195
1.86385	0.387214		0.442345	0.105835
1.17293	0.370395		6.8823	0.121556
0.565506	0.625199		0.657192	0.581036
0.085514	0.208916		0.298236	0.350449
0.070609	0.116902		0.437327	1.0778
0.170912	0.006759		0.508201	0.179202
1.04555	0.263565		0.368022	0.095779
1.84057	0.405163		1.03135	0.002504
0.312232	0.202413		0.981514	0.654535
0.247746	0.702507		1.35105	0.054462
1.07753	0.482378		0.604022	0.076173
2.65924	0.100044		1.04329	0.003319
0.362962	0.097809		1.04345	0.167251
0.079118	0.284031		1.15535	0.03311
0.814637	0.006546		0.010029	0.005569
0.233752	0.064269		0.01738	0.005586
0.347447	0.916766		0.674041	0.392257
0.280742	0.009397		0.612609	0.702143
0.069695	0.331804		5.09647	0.00425
0.50102	0.588057		1.00886	0.0025
2.95863	0.369172		0.998346	0.00387
3.03612	0.707363		1.38768	0.686473
0.49236	0.022763		0.480559	0.003066
0.131364	0.013485		1.11618	0.026937
0.952933	0.293984		0.649712	0.194831
0.603872	0.008201		0.464426	1.10155
0.854307	1.15328		4.58425	0.001455
0.081847	1.42364		3.2125	0.560129
0.397262	0.364581		3.16894	0.002766
0.039252	0.028855		1.39894	0.074293
0.339549	0.486771		1.67336	0.227482
2.13296	0.441189		6.08801	0.002891
0.177589	0.524245		0.293432	0.333957
0.418579	0.666895		1.53659	0.02778
0.082027	0.523969		0.595084	0.251382
1.21357	1.38449		4.00718	0.002505
1.26393	0.009925		1.78036	0.103951
2.24882	0.728592		0.377593	0.036569
0.236715	0.016172		6.19842	0.00274
0.71916	0.359606		0.318782	0.003557
0.168081	0.377291		2.37436	0.478777
1.54042	0.240218		1.50463	0.003121
0.024042	0.217779		0.960281	0.131252
1.32215	0.572437		2.5233	0.157663
0.341066	0.661895		1.72135	0.059747
0.25936	1.45065		2.33676	0.002658
0.451929	1.56819		2.94542	0.053209
0.303863	0.399041		9.63981	0.525907
0.328562	0.315866		0.011996	0.005415
2.77725	0.857211		0.17397	0.003949
0.902338	0.184765		4.19508	0.76255
0.18816	0.766771		0.792322	0.01277
0.014402	0.350946		0.142226	0.003773
0.010095	0.702214		0.211518	0.003791
1.05659	0.509543		2.0027	0.342328
0.390134	0.73994		0.203015	0.329153
0.436764	0.132214		0.957617	0.00512
0.717773	0.095531		0.103265	0.046913
0.638101	0.65588		0.251044	0.160831
3.44461	0.091126		0.991424	0.330269
0.00447	0.194572		2.73684	0.005827
0.461375	0.899645		0.241243	0.067996
0.005607	0.46496		0.408283	0.35551
0.00962	1.00295		0.353658	0.097949
0.258219	0.414516		3.61051	1.13856
0.264598	0.506727		3.3011	0.018237
0.042509	0.128567		0.337368	0.053169
0.010649	0.317643		3.2434	0.315192
0.011835	0.264702		1.89665	0.124801
0.011258	0.29368		2.70561	0.27641
0.882498	0.105948		0.991238	1.1028
0.289821	2.09745		4.21237	0.111166
0.025252	0.692383		0.796308	0.032703
0.011611	1.34457		4.0575	0.55111
2.02036	0.259496		2.9722	0.29017
3.36998	0.164339		7.07052	0.149673
1.05846	0.612145		0.802936	0.035625
0.003684	0.448097		0.201981	0.174362
1.23803	0.441274		1.51291	0.00199
0.08266	0.443989		0.678873	0.044501
0.009442	0.237664		0.986172	0.421295
0.723542	0.616184		0.797509	0.140795
0.813821	0.244139		0.196755	0.680211
0.00355	0.084228		0.764697	0.102459
0.018649	0.621635		4.82473	0.33713
0.069372	0.126236		0.964943	0.181541
0.108266	0.271567		5.84872	0.297264
0.072491	0.256784		3.69495	0.033564
0.005328	0.398621		6.30444	1.14767
0.697531	0.605841		1.69581	1.33552
0.004485	0.072109		0.877304	0.050958
0.030227	0.056493		0.283002	0.270308
1.53764	0.34223		0.424231	0.596627
0.004256	0.774157		3.73004	0.092884
0.003967	0.5578		5.81358	0.983814
0.058687	0.210745		0.026379	0.008105
0.006731	0.082782		0.049231	0.222494
0.913774	0.010276		2.0126	0.251898
0.121085	0.012347		1.10526	0.325164
0.717303	0.006661		2.641	0.138827
0.114049	0.107656		0.836022	0.290738
0.004818	0.523663		1.14474	0.097213
0.006485	0.402203		2.57288	0.398543
0.001991	0.008922		1.09579	0.283225
0.00421	0.322014		3.04951	0.572287
0.007099	0.465739		0.597497	0.291124
0.00555	0.099757		0.934402	0.136343
0.004725	0.006673		3.0545	0.842445
0.00242	0.213994		2.41663	0.151119
0.023485	0.010803		0.491045	0.374858
0.006293	0.010158		0.906588	0.133647
0.004375	0.009336		2.0788	0.83714
0.041949	0.005214		0.99362	1.08795
0.067248	0.015756		1.49682	0.504345
0.002988	0.433134		6.66852	0.303687
0.008399	0.008841		4.48158	1.39486
0.011227	0.075867		1.81742	0.399068
0.002996	0.15673		2.82734	0.771027
0.010226	0.098485		0.49183	0.452175
0.004182	0.159269		0.35967	0.152068
0.00966	0.317566		0.334843	0.588183
0.045152	0.519043		0.200479	0.03297
0.005596	0.162826		2.13963	0.50315
0.189518	0.497403		1.71872	1.54298
0.006716	0.062416		0.270382	0.830018
0.002491	0.536949		2.06217	0.200157
0.002514	0.109729		2.56702	0.369749
0.008865	0.211514		0.838942	0.110634
0.080631	0.941476		0.038238	0.405587
0.004956	0.484438		0.296897	0.379571
0.002145	0.145634		4.87064	0.041869
0.003214	0.531314		2.62235	0.311364
0.006253	0.060442		2.34527	0.408118
0.033958	0.13987		1.46261	0.530213
0.089193	0.312881		0.547161	2.04069
0.001847	0.238121		5.53321	1.42092
0.006211	1.08166		1.01254	1.94676
0.004291	0.883376		4.6013	0.202784
0.215084	0.130948		0.422313	1.82778
0.006993	0.090223		3.51659	0.025568
0.010919	0.113656		2.70072	0.240973
0.009784	0.30192		0.918541	0.76923
0.010167	0.452876		1.0843	0.211187
0.005595	0.272729		3.76355	1.61118
0.005255	0.430745		2.25576	0.707948
0.006272	0.134646		0.407417	0.028012
0.005928	0.521969		0.330757	0.270742
0.002282	0.182304		0.607142	0.138424
0.009474	0.111095		5.74015	0.119234
0.301968	1.38379		3.54318	0.131239
0.011136	0.179119		0.663597	0.314189
0.013549	0.110759		0.469103	0.040571
0.004866	0.324535		6.01086	2.1244
0.011387	0.069461		1.47376	0.071347
0.061358	0.389362		1.07767	1.80138
0.007862	0.139382		0.600862	0.332807
0.00985	0.651025		1.23453	0.044666
0.026556	0.433235		0.361103	0.966681
0.002784	0.678618		5.91393	1.23203
0.541916	0.174753		0.710085	0.185462
0.09769	0.278226		1.11355	0.798087
0.158614	0.215509		1.51873	1.12092
0.00336	0.248765		0.526206	1.7165
0.003455	0.856912		1.44919	0.247481
0.008652	0.454937		0.558912	0.418453
0.004766	0.710145		1.28696	0.319727
0.005563	0.186314		0.46258	0.050886
0.006523	0.23444		0.929837	0.021952
0.006528	0.070988		0.541628	0.597419
0.045798	0.465714		1.63387	0.541353
0.30346	0.240984		4.46642	0.177106
0.008331	0.458284		3.36171	0.266339
0.002216	0.75767		1.12233	0.030439
0.002898	0.786464		2.12087	0.255214
1.49191	0.804701		4.14523	0.049359
1.63984	0.143971		2.08484	0.116385
0.774551	0.008005		1.26454	0.551873
0.138115	0.448569		7.23322	0.259918
0.400301	0.132638		7.19276	0.590003
0.502601	0.179125		0.017408	0.066614
1.49179	0.665497		0.435706	0.093952
0.683698	1.22877		3.06181	0.165145
0.442785	0.254917		1.93906	0.233483
2.9393	0.147878		6.49129	0.167406
1.68387	0.470054		0.127345	0.092273
0.51967	0.238686		0.992195	0.020921
1.45701	1.25714		0.318404	0.153273
2.9189	0.368854		0.144034	0.024682
1.13119	0.137364		1.78487	0.128569
0.415492	0.361721		1.33594	0.158879
1.10168	0.234352		0.267703	0.040785
0.764202	0.099669		0.22908	0.778577
0.752667	0.399204		1.40632	0.897387
0.26126	0.485822		0.193895	0.440846
1.36762	0.146535		1.62469	0.12421
0.491329	0.36221		0.482875	0.658833
0.359784	0.080317		0.330592	0.227528
0.547372	0.072101		2.39339	0.480542
1.46609	0.319691		4.96014	0.662686
0.755326	0.249762		0.489425	0.026453
0.009977	0.325279		3.94344	0.075386
1.20414	0.12037		0.902135	0.073499
1.11808	0.006091		1.00209	0.174058
1.64596	0.716848		0.33258	0.539001
4.51034	0.051542		0.005182	0.062326
0.559847	0.145538		0.32955	0.312284
0.224579	0.014005		4.20573	0.095842
0.720523	0.535957		0.736859	1.30396
0.011573	0.552349		1.35324	0.606924
3.45464	0.442519		0.773982	0.163501
0.213693	0.004941		0.824528	0.056866
3.26782	0.012016		0.035548	0.308647
0.276896	0.395498		1.69806	0.00929
1.42303	0.439083		0.015639	0.817261
0.173851	0.074145		0.019845	0.084415
1.23278	0.004365		7.75441	1.23872
0.002499	0.122255		0.006836	0.036084
0.31701	0.305682		0.450942	0.04512
1.3845	0.020654		0.062927	0.078932
0.415041	0.420609		0.012927	1.2116
3.57074	0.668972		0.063043	0.025395
1.54439	0.029397		1.31983	0.052417
1.7161	0.037379		0.870714	0.010687
0.493263	0.281515		4.65589	0.123849
0.301402	0.206928		1.5843	0.060445
1.69651	1.13607		0.054442	0.005259
0.444368	0.079445		0.158119	0.0089
0.028291	0.667996		0.003308	0.004321
0.24721	0.270918		0.039401	0.005943
1.88706	0.27637		0.878517	0.003412
2.07537	0.672131		0.026205	0.002774
1.05549	0.095981		1.21079	0.005182
0.025606	0.076168		0.304882	0.187398
0.653123	0.222026		0.020686	0.01589
0.013823	0.083721		2.16952	0.200489
0.006777	0.515818		2.91284	0.2579
0.508511	0.533272		2.55752	0.007708
4.53806	0.505476		1.52366	0.004086
0.002038	0.007415		3.51393	0.004526
0.795588	0.008344		0.004768	0.004777
0.004049	0.831309		2.89398	0.513345
0.8134	0.004577		2.64674	0.015037
0.004546	0.680659		1.04977	0.007142
0.078777	0.048749		1.15186	0.004413
0.013688	0.170185		0.811012	0.003046
2.68094	0.012046		0.030817	0.004835
1.82356	0.736167		0.009061	0.004332
0.004613	0.006149		0.790105	0.005244
0.066781	0.006821		4.42099	0.004233
0.006031	0.210475		0.003362	0.003894
0.011392	0.145724		0.02118	0.00263
0.086127	0.425227		1.10397	0.00427
3.80227	0.668082		0.056663	0.057774
2.23771	0.487348		0.003886	0.010235
0.901257	0.058668		0.00744	0.134799
1.75936	0.00611		0.630948	0.129656
0.663976	0.006951		0.004361	1.09052
0.315975	0.016432		4.30635	0.071624
2.25302	0.13762		0.006084	0.095037
0.007995	0.546599		0.030566	0.196932
1.17012	0.690867		0.002884	0.226306
1.72056	0.199001		0.017472	0.298324
0.007805	0.00522		2.87456	0.416554
0.070681	0.022731		0.003018	1.06066
0.016501	0.571936		0.014381	1.02262
0.747521	0.01309		1.16316	0.869167
0.570721	0.34872		0.006992	0.104718
0.004383	0.572886		0.12705	0.07351
2.71572	0.172646		0.007607	0.255188
0.010117	0.263557		0.813276	0.092054
0.011522	0.013169		0.009316	0.018842
0.008262	0.135507		0.030336	0.719048
2.46239	0.08439		2.48545	0.060083
0.009538	0.822662		0.006191	0.316873
0.003517	0.101197		0.003405	0.082701
0.53949	0.537162		0.010846	0.687346
1.91375	0.692277		0.008018	0.542048
0.010142	0.074738		0.844482	0.0281
0.006438	0.011933		0.071429	0.104881
2.46577	0.481174		1.38064	0.205366
3.68539	0.358041		0.003043	0.060943
0.00248	0.277656		0.028479	0.081091
0.472379	0.155329		0.005015	0.872411
0.003192	0.205649		0.013211	0.132734
0.001995	0.023437		0.017722	0.271137
3.47684	0.221125		1.16354	0.319402
0.004714	0.205003		3.09355	0.151784
0.001857	0.115237		1.7395	0.403321
0.001797	1.20977		0.017642	0.378744
2.29194	0.488877		5.43009	0.301208
0.002506	0.013048		1.16913	0.09566
0.001735	0.217576		0.113853	0.307095
0.005703	0.521146		0.007434	0.684684
0.002483	0.172525		0.070599	0.14763
0.009907	0.125083		2.16433	0.145701
0.001989	0.845166		0.050211	0.095199
0.001814	0.460284		1.06694	0.173263
0.002258	1.74406		0.005743	0.290015
3.7927	0.17158		0.092483	0.068358
0.001945	0.291423		0.03071	0.082598
0.002639	0.061517		0.003005	0.172844
3.7568	0.074461		2.59569	0.087609
3.2162	0.080784		0.267873	0.07809
0.003188	0.193717		0.031726	0.277813
0.001685	0.350288		0.778006	0.38695
0.002072	0.023053		1.40967	0.285205
0.002649	0.129821		0.032029	0.445464
3.52596	0.024316		0.018998	0.412241
0.004435	0.020529		1.51538	0.932589
0.418949	1.46108		0.033157	0.684204
2.28878	0.818114		0.338937	0.210902
2.07595	0.120687		2.86517	0.487847
7.50102	0.016948		1.23304	0.439543
0.205078	0.117157		0.047966	0.201846
6.92462	0.278012		0.036756	0.275688
1.65649	0.434761		0.782751	0.409302
0.002597	0.18634		0.198261	0.004647
0.002595	0.286113		0.014381	0.061263
0.002628	0.256665		0.054504	0.576982
4.94508	0.62183		0.265911	0.01126
0.00209	0.275674		0.08864	0.012977
2.32963	0.892214		0.009908	0.061847
6.01322	0.444206		3.7965	0.059479
1.02688	0.320198		0.198997	0.462032
0.820647	0.286641		0.191816	0.567661
0.003997	0.30501		0.563188	0.04132
0.003014	1.04468		0.10904	0.085361
0.629737	0.008803		1.25302	0.02241
0.006969	0.292612		0.022312	0.084885
0.035755	0.07673		0.628177	0.049958
0.002971	0.193444		0.164187	0.456592
0.001671	0.268057		0.566312	0.022462
0.506915	0.832938		2.94172	0.045289
0.01123	0.825162		0.056872	0.069945
0.005924	1.05783		1.60735	0.064821
0.98638	0.282693		0.558428	0.046655
0.301158	0.499793		1.59419	0.074405
0.485717	0.394036		2.15679	0.315022
0.002644	0.096823		0.112167	0.137377
0.512406	0.693773		0.023791	0.259761
0.469156	0.416201		2.04244	0.486313
0.052126	0.312877		0.009908	0.045334
0.722516	0.466623		0.004439	0.010286
0.570389	0.378893		0.006055	0.256669
0.818619	0.286832		0.006409	0.046654
0.318028	0.714377		0.008956	0.004209
0.007571	0.235303		2.46534	0.003403
0.023674	0.777928		2.34026	0.574315
2.49503	0.701507		1.71622	0.161312
0.004168	0.797382		4.25638	0.003293
0.005415	0.078276		0.00859	0.00694
0.004147	0.744024		0.006919	0.722414
0.00345	0.588563		0.004937	0.02645
0.003942	0.522155		0.006767	0.004539
0.004001	0.267624		2.37532	0.003038
0.850956	1.48261		0.473576	0.33668
1.73113	0.190565		1.16223	0.001845
1.19762	0.274442		3.33125	0.005833
1.14607	0.397505		0.115464	0.004478
0.757814	0.474152		1.92973	0.007668
0.917872	0.126443		1.57072	0.008948
0.862108	0.433771		0.145154	0.184564
0.24638	0.305626		0.05746	0.30691
1.32006	1.08213		0.018836	0.003037
0.800107	1.5937		5.61727	0.005932
1.40337	0.637975		9.52041	0.003704
0.261627	0.127538		0.016554	0.060244
1.07006	0.487797		6.37854	0.0044
0.750137	1.39799		2.17736	0.003658
1.62515	0.547844		5.42259	0.034035
1.39085	0.076505		0.326981	0.03105
0.49574	0.273317		0.019639	0.009327
0.64274	1.25476		3.9868	0.056104
0.966573	0.882692		2.22609	0.005951
3.30966	0.195548		0.011954	0.003083
0.517802	0.145853		3.27771	0.046216
0.499481	0.335884		0.02848	0.004114
1.41807	0.318349		6.27445	0.480752
1.18545	0.406721		0.01385	0.003451
0.667119	0.168326		1.2391	0.255721
0.837397	0.306853		0.042791	0.004964
2.07739	0.395636		0.230706	0.357917
0.591655	0.966674		0.788002	0.004095
0.173926	0.215994		0.018819	0.00333
0.785412	0.244752		0.998973	0.009152
1.13215	1.13332		6.61238	0.004349
0.328871	0.51059		0.620179	0.467152
1.40364	0.539109		5.90124	0.026992
0.260551	0.263734		1.15549	0.00454
0.734019	0.503519		3.57086	0.377646
1.11006	0.3358		0.271117	0.070226
0.611334	0.854946		0.063935	0.963493
0.478092	0.391561		0.477223	0.04271
3.50152	0.187469		0.582827	0.141692
0.73552	0.254294		7.39618	0.16934
1.59877	0.704478		5.60683	0.012265
0.313426	0.612356		2.05782	0.008426
1.13488	0.440428		0.041971	0.007523
0.098684	0.490617		4.30888	0.96449
0.422308	1.62144		4.25164	0.059689
0.574532	0.36376		4.10431	0.157175
0.528405	0.59433		0.79383	0.004545
0.326002	0.437707		0.038025	0.055921
2.26095	1.28004		6.38723	0.00631
0.474574	1.31075		0.011026	0.109156
0.353277	0.745541		0.918913	0.027263
0.341947	0.07391		3.61476	0.003443
0.574104	0.72261		0.732271	0.04077
0.157359	0.995758		0.016921	0.004634
0.495059	0.353197		5.83017	0.018202
3.52718	0.372229		3.65166	0.09581
0.796753	0.502022		2.92797	1.26754
1.43823	0.451883		4.64498	0.182715
2.60493	1.00395		0.007196	0.006086
0.699905	1.02062		0.028552	0.004775
0.697043	0.607459		3.51042	0.004965
1.01167	1.28228		0.001373	0.189215
0.927913	0.228712		0.049814	0.522404
0.217539	0.456028		2.82515	0.239096
1.34301	0.224152		0.016199	0.004949
2.0816	0.297242		0.416931	0.003009
0.255236	0.688065		0.351032	0.076726
0.009236	0.614158		1.12352	0.042984
1.3081	0.71821		0.199735	0.059453
0.186879	0.372625		1.56244	0.003788
0.805254	0.337148		0.480451	0.003148
0.129537	0.569321		0.014063	0.002629
0.796842	0.67937		0.01382	0.345344
0.792693	0.331777		0.021935	0.084331
0.700726	0.309023		0.007527	0.054992
4.14755	0.189245		0.010928	0.441077
1.20441	0.328151		0.342726	0.142656
1.04894	0.584201		3.35916	0.002776
1.05688	0.231909		0.056742	0.01888
0.797753	0.018999		1.08129	0.671042
0.921598	0.443048		0.200987	0.002847
0.969902	0.093969		0.574683	0.186914
1.25589	0.070647		0.040601	0.27809
0.193807	1.09898		0.119865	0.002625
0.669037	0.924914		0.222432	0.271542
1.05937	1.08294		0.60637	0.006732
0.506792	1.03674		0.434212	0.001927
0.201489	1.76643		0.55943	0.003821
3.41381	0.238921		0.218062	0.042843
2.03713	0.162566		0.007398	0.020371
0.602159	0.652277		0.015177	0.363448
0.143742	1.6875		0.141686	0.003599
0.660381	0.044316		0.368498	0.231768
0.897239	0.602296		0.062015	0.002762
1.86254	0.550463		0.715055	0.001508
1.3517	0.147782		0.183629	0.00504
0.573651	0.406705		0.481904	0.012868
1.18147	0.114361		0.136816	0.003515
0.42671	0.951739		0.109567	0.002164
0.273234	1.44169		0.597388	0.003498
0.830693	0.131678		0.047262	0.125026
4.60289	1.09597		0.01997	0.003805
0.575322	1.39759		0.086872	0.032254
1.92602	0.545036		0.048788	0.002848
1.88467	1.52157		0.110527	0.026873
0.606845	0.405759		0.505206	0.236205
0.908191	0.105618		0.034375	0.05505
0.19445	0.752717		0.974031	0.002671
1.54087	0.382778		0.953623	0.042286
0.290341	0.720766		0.681688	0.054974
1.52655	0.099053		0.113597	0.00455
0.358806	0.837924		0.019065	0.018323
0.760501	0.640494		0.106929	0.00363
1.02851	0.789977		1.19973	0.001876
1.51101	0.558001		0.053551	0.002368
1.16288	0.283963		0.089827	0.002654
0.922374	0.89443		1.19289	0.191937
0.344679	0.114949		0.049996	0.254991
0.5025	0.791897		0.659228	0.003472
0.38865	1.37013		0.260096	0.003358
1.00317	0.193991		0.240078	0.176348
2.06099	1.18009		0.377303	0.02356
1.61113	0.046344		0.212995	0.001803
4.19798	0.178354		0.046534	0.002674
2.1285	0.12238		0.384634	0.002134
2.46987	0.217886		0.022234	0.036174
0.329169	0.867353		0.361599	0.004876
2.24693	0.043639		0.141875	0.004258
0.935927	0.072046		0.441755	0.003021
0.787185	0.336094		0.557097	0.002806
0.575839	0.260476		0.096315	0.002007
2.47163	0.053961		0.401077	0.001986
0.865452	0.501593		0.592491	0.003224
1.21786	0.113567		0.01249	0.003187
1.91985	0.636292		0.301193	0.003421
2.20153	0.102881		0.258324	0.00382
1.83732	0.085088		0.51177	0.002408
1.06501	0.213475		0.228118	0.079755
0.273681	0.217313		0.010057	0.001767
0.066022	1.21221		0.131138	0.003169
1.38483	0.08297		0.221502	0.002411
0.210526	0.720384		1.2997	0.095274
0.990451	0.106391		0.436731	0.007165
0.611959	0.140436		0.029574	0.102566
0.483142	0.659531		0.371392	0.003606
0.988533	0.730675		0.39082	0.002679
0.651717	0.814402		0.245665	0.002765
1.40706	0.719142		0.034076	0.003861
0.601067	0.287835		0.104411	0.001375
1.16555	0.318106		0.368176	0.002438
0.795046	0.286329		0.063501	0.001902
0.730837	0.937727		0.024279	0.003188
0.536413	1.37397		0.298595	0.052553
0.653751	0.232818		0.066736	0.002485
0.341639	1.3504		0.241945	0.002336
1.70123	0.707651		0.041556	0.003215
0.933148	0.174129		0.042392	0.00265
1.64794	0.459589		0.043601	0.002252
1.61493	0.174539		0.073051	0.395431
0.005228	0.614918		0.020986	0.035029
0.032582	0.931223		0.210329	0.002271
2.45161	0.153676		0.143769	0.00208
1.3436	0.120579		0.693823	0.009461
2.26207	2.02062		0.139323	0.002179
0.692182	1.31425		0.492789	0.002194
0.776689	1.03045		0.176386	0.130578
1.2481	1.81502		0.691259	0.001686
1.67326	0.257732		0.051848	0.002971
1.98991	0.422576		0.051788	0.002566
0.305802	1.1522		1.17895	0.00232
0.97462	0.114863		1.22079	0.003178
1.2872	2.67253		0.119484	0.003258
2.23657	1.26852		0.229671	0.003522
2.65909	0.88952		0.260187	0.003618
0.798843	1.74629		0.122383	0.00254
0.543488	0.158727		0.006479	0.001767
0.213454	0.806475		0.008405	0.0037
1.75221	0.016886		0.214745	0.001712
1.5776	0.40282		0.451889	0.247406
0.76965	0.314244		0.424699	0.001513
1.29324	0.97958		0.152844	0.002461
1.16575	0.70557		0.026143	0.00243
1.08864	0.531345		0.168188	0.003875
0.981849	2.20116		0.316683	0.003041
1.18362	0.08864		0.376433	0.002629
1.41766	0.1539		0.057112	0.002238
1.75471	0.546997		0.193447	0.002927
1.85194	0.11048		0.013594	0.002528
1.99107	0.359383		0.040919	0.001669
3.19866	0.080007		0.019943	0.002915
1.0618	0.701463		0.244652	0.002345
1.24786	0.073121		0.083337	0.00279
1.10491	0.309821		0.552622	0.006248
1.66431	0.287081		0.189983	0.002638
1.21829	0.248201		0.124699	0.002649
3.41887	0.614964		0.02548	0.007188
1.13403	0.276718		0.603555	0.001466
0.745279	0.464913		0.12881	0.002541
2.22686	0.221356		0.318387	0.007209
0.779321	1.57889		0.502493	0.002629
1.64204	1.48874		0.488448	0.002498
0.728213	0.904111		0.09311	0.005603
0.001557	0.151614		0.11886	0.002754
1.00194	0.516216		0.012633	0.006299
1.2372	0.37491		0.673041	0.002169
0.155917	1.40567		0.80778	0.002754
0.356152	0.698644		0.074988	0.004539
2.70779	0.175153		0.050401	0.002087
2.33626	0.260695		0.137261	0.004858
1.0835	0.265832		0.195085	0.002417
1.7432	0.5088		0.231337	0.002622
2.60004	1.44756		0.612872	0.002775
4.82439	0.033003		0.672414	0.002263
3.49633	0.346369		0.309109	0.00208
2.41283	0.640797		0.104041	0.002421
0.824584	0.264948		0.13575	0.001719
1.0968	0.103457		0.183782	0.027159
0.470138	0.220896		0.12115	0.002017
5.41695	0.28044		0.169364	0.002508
4.63665	0.224953		0.301563	0.116527
3.53388	0.273256		0.95089	0.002772
1.67758	1.45944		0.005825	0.001881
1.98783	0.701258		0.098672	0.004679
2.85084	0.337678		0.137625	0.002952
1.07826	0.104225		0.446252	0.002896
1.08541	0.348719		2.21106	0.002055
1.74131	0.250974		0.108762	0.00395
5.88052	0.429162		0.009459	0.002305
2.11491	0.272302		0.295546	0.002487
0.742228	0.597427		0.355721	0.002004
0.501214	0.055605		2.12621	0.001937
3.85718	0.080426		0.046671	0.003507
5.3468	0.346717		0.079013	0.001924
1.02444	0.607793		0.214305	0.002327
1.88548	0.397553		0.478477	0.230711
0.160374	1.18197		0.74481	0.001764
2.51622	0.057457		0.36659	0.001386
1.54543	0.080761		0.700428	0.002443
0.701002	0.039862		0.289625	0.0033
4.09922	0.58682		0.069282	0.002827
1.5625	0.201643		1.32496	0.003034
2.53556	0.042005		0.036592	0.042714
0.435918	0.232832		0.158512	0.005287
2.32899	1.1409		0.557003	0.004296
1.86611	0.082542		0.983306	0.007836
2.06116	0.531372		0.003493	0.001667
0.338619	0.590459		0.257919	0.002241
0.009927	0.045515		1.16403	0.005859
3.48649	0.390598		0.867625	0.002013
0.003286	0.51121		0.166744	0.03362
0.004966	0.420709		0.372218	0.001753
4.39276	0.046733		0.32037	0.002034
4.32417	0.059165		0.531085	0.002601
0.016324	2.02788		0.715814	0.003647
0.00474	0.278999		1.63908	0.002716
0.008273	0.048611		0.546392	0.001475
0.006381	1.34202		0.421027	0.001681
0.005972	0.102299		0.219721	0.002574
8.78684	0.162214		0.128687	0.026306
0.002784	0.343832		0.487392	0.013409
0.007332	0.104282		0.386463	0.002893
0.008915	0.041742		0.057973	0.002257
0.006084	0.288476		0.060539	0.00166
3.68245	0.127438		0.438152	0.002334
0.008916	0.156781		0.049436	0.00358
0.012438	0.852557		0.117252	0.003549
0.005698	0.007151		0.149139	0.003511
0.017291	0.878002		0.203182	0.002516
0.008785	1.09976		0.549738	0.002154
0.010806	0.163761		0.451321	0.012369
0.011284	0.02703		0.635534	0.002528
0.004276	1.03934		0.639629	0.005087
4.27603	0.081242		0.105017	0.004388
0.01156	0.439147		0.344875	0.005423
0.003046	0.372754		0.556827	0.005394
0.006494	0.39884		0.825781	0.003036
0.004174	1.09632		0.213662	0.003489
0.00616	1.38111		0.490872	0.002622
0.007889	0.008257		0.059007	0.002394
0.005181	0.283948		1.32162	0.002263
5.10003	0.701254		0.726792	0.006739
0.005007	0.044478		0.173308	0.003462
0.011301	1.0551		0.399159	0.001564
0.025952	0.643907		1.36812	0.001693
0.01882	0.340408		0.321849	0.001988
0.002544	0.438857		0.689606	0.002852
0.003525	1.0149		1.40044	0.003772
0.166624	0.4034		0.640695	0.002251
0.001654	0.392203		1.40284	0.002453
0.12176	0.942011		0.470401	0.002958
0.010883	1.0526		0.601986	0.003117
0.017245	0.31339		0.368021	0.003764
0.009019	0.044862		0.363292	0.003582
4.36541	0.267955		1.84777	0.003207
0.002849	0.634735		0.358189	0.003082
0.50178	0.106451		1.04901	0.003782
0.002179	0.379361		0.437039	0.002035
0.006317	0.138376		0.380432	0.06643
0.106511	0.063943		0.490617	0.0028
0.006917	0.153543		0.336921	0.00493
9.35376	0.194375		0.236649	0.003073
0.003705	0.424167		0.50896	0.003033
0.00354	0.533937		0.88285	0.001315
0.003768	0.204718		0.281064	0.124441
4.84401	0.18047		0.398122	0.006837
0.034596	0.204823		0.002626	0.002618
0.023301	0.167728		0.003911	0.002598
1.03266	0.681975		0.005735	0.002709
0.003805	0.166251		0.569829	0.003189
2.49143	0.443718		0.492976	0.003428
0.003961	0.314082		0.211154	0.004301
0.675081	0.339988		0.016323	0.002266
0.024158	0.264593		1.55663	0.002853
4.65774	0.064737		0.188077	0.003968
0.003995	0.065039		0.004992	0.00236
0.004001	0.244245		0.068435	0.00528
0.005265	0.32786		7.79113	0.004027
4.69813	0.014413		3.162	0.003118
2.34592	1.21103		0.031301	0.003136
0.00204	0.075407		0.327553	0.01408
0.005804	0.133506		0.006931	0.005299
0.004153	0.124179		0.865496	0.003079
0.01712	0.17738		0.149151	0.002301
0.016664	0.088456		1.21832	0.001061
0.005511	0.146205		0.00592	0.004387
5.9312	1.85753		0.002602	0.00242
0.003884	0.250257		0.84187	0.134884
1.39281	0.45236		0.330378	0.003051
1.93146	0.287977		3.10202	0.00145
0.018817	0.028955		0.005621	0.002692
0.003962	0.202039		0.433132	0.004051
0.190235	0.065799		0.565727	0.002878
3.55646	0.279536		0.578342	0.004608
0.004754	0.214915		0.943373	0.002847
0.006095	0.243253		2.95481	0.00229
7.92915	1.42213		1.49238	0.003487
7.95302	0.098242		0.102279	0.003497
0.005264	0.232283		0.001831	0.006748
0.004059	0.66968		0.006901	0.001876
0.004761	0.222533		0.002956	0.120214
0.02962	0.053671		0.002988	0.001411
0.107763	0.110299		0.537642	0.001955
8.72545	0.148597		1.09259	0.003168
0.005895	0.59258		0.166253	0.003026
0.004528	0.197931		0.003357	0.003733
0.004728	0.140709		0.003519	1.11228
0.005847	0.091551		1.15906	0.129441
8.33681	0.088939		0.159278	0.015465
0.005898	0.388006		0.00176	0.004326
1.46727	0.115426		0.173043	0.023253
4.6673	0.206024		1.17642	0.002969
0.007795	0.440763		0.010106	1.34617
0.008623	0.351619		0.008138	0.250423
0.430067	0.818097		0.002216	0.004506
0.002758	0.069316		1.20594	0.002892
0.002767	0.408241		0.3623	0.003197
0.004076	0.074668		0.501411	0.004068
0.010306	0.059004		0.023068	0.068415
0.003582	0.274826		0.44298	1.11641
0.0045	0.325416		0.002853	0.26477
0.008082	0.11373		0.002475	0.419512
0.003819	0.563522		0.792316	0.00266
0.0028	0.019471		0.001457	0.040036
0.003169	0.27581		0.002963	0.620172
1.11125	0.442713		2.0981	0.005029
0.002863	0.093053		0.01593	0.066125
0.003969	0.005138		0.009735	0.002094
0.003928	0.05358		1.72356	0.012881
0.011881	0.060199		2.91993	0.323236
0.022977	0.055427		0.002366	0.002151
0.003916	0.322918		0.001983	0.001961
5.4709	0.009216		0.002032	0.002688
0.004739	0.103032		0.008043	0.003194
0.003377	0.008802		0.017056	0.003686
3.76547	0.13324		0.365648	0.003563
0.004857	0.036864		0.018942	0.00257
0.002027	0.462738		0.319556	0.19104
0.006116	0.075687		0.167329	0.225262
0.018435	0.09133		0.011167	0.107117
9.39391	0.077311		2.4885	0.003298
0.002033	0.986592		0.992671	0.002252
0.007659	0.263843		0.716068	0.005955
1.16278	0.008928		0.199429	0.00216
2.79237	0.032534		0.213568	0.00219
0.004363	0.011002		0.001881	0.002907
0.004536	0.008631		4.90396	0.002418
0.009957	0.284642		0.817544	0.004974
0.565763	0.009188		3.3244	0.158529
0.214824	0.062337		0.005078	0.004336
0.08667	0.013555		0.011181	0.002578
0.064919	0.089544		0.003065	0.01203
0.032458	0.493087		0.026721	0.003213
0.570508	0.506499		0.385623	0.003795
0.046382	0.058806		1.56201	0.01181
0.322341	0.108775		1.05034	0.002175
0.010381	0.564685		0.051386	0.001985
1.1368	0.484288		0.029084	0.001304
0.007013	0.053989		1.2609	0.061622
0.008667	0.013038		0.010689	0.002186
0.008549	0.192548		2.96458	0.002676
0.784374	0.980322		0.703027	0.002486
0.709093	1.03802		0.912896	0.001399
0.047859	1.13161		0.002318	0.003224
0.013425	0.124666		0.024149	0.00322
0.007816	0.062103		2.00706	0.003862
0.008467	1.08468		2.23392	0.049976
0.631735	0.229827		1.67058	0.001817
0.148167	0.079246		1.12033	0.002774
0.408644	0.416351		0.110089	0.913047
0.551328	0.487414		0.576809	0.002184
0.031608	0.366541		2.80032	0.001528
1.02792	0.053595		0.834148	0.002723
0.006864	0.282278		0.924147	0.002585
0.086474	0.052361		0.011547	0.810124
0.323912	0.175325		1.43178	0.002882
0.009275	0.104013		1.13234	0.001681
0.289756	0.047966		0.351801	0.21046
0.006976	0.104639		6.69444	1.21464
0.065332	0.096943		1.39774	0.001331
0.445863	0.080392		0.044398	0.004178
0.00624	0.40869		0.048847	0.796535
0.027076	0.138842		0.563162	0.002956
0.522147	1.33251		0.228002	0.002928
0.011732	1.24459		1.48972	0.002981
0.384452	0.461726		1.20154	0.190339
0.016732	0.959733		0.579397	0.003446
0.28306	0.699951		2.8787	0.002404
0.008929	0.690528		1.13848	2.40916
0.013751	0.11582		0.888584	0.00493
0.00725	0.548135		3.83019	0.019152
0.154242	0.121714		0.32203	0.002035
0.089833	0.090026		0.88885	0.01674
0.003877	0.871131		0.108364	0.002754
0.033307	0.957285		0.343898	0.802496
1.70346	0.225825		0.762404	0.251531
0.004588	0.707406		1.23046	0.005094
0.858807	0.489757		2.66922	1.39296
0.005417	0.077854		3.69853	0.112444
0.278311	0.080679		0.173003	0.004426
0.0374	0.004079		1.11331	0.325741
0.005811	0.017853		2.65072	0.007949
0.017229	0.076087		0.205006	0.014276
0.0079	1.20008		0.562987	0.004622
0.005124	0.263127		0.683326	0.185721
0.003222	0.160581		2.93038	0.40391
0.011372	0.298411		0.338994	0.895648
0.00568	0.206966		0.004078	0.277237
0.003838	0.373417		0.826369	0.018234
0.013324	0.008799		3.58446	0.211773
0.006471	0.15261		1.55482	0.027748
0.502484	0.578987		1.09485	0.937998
0.025494	0.571828		0.352951	0.458257
0.005576	0.009122		1.11089	0.366041
1.36998	0.005799		0.762436	0.001893
0.006625	0.815006		1.68661	0.004276
0.004246	0.439738		0.257642	0.6353
0.065546	0.007249		0.882563	0.809793
0.14802	0.00768		1.22242	0.637791
0.006434	0.013865		5.17014	0.002432
0.002764	0.116262		0.274865	0.16753
0.051565	0.363186		0.680343	0.026269
0.00364	0.216981		1.37949	0.012537
0.381419	0.232978		4.92272	0.111328
0.024034	0.014567		1.30818	0.077346
0.745251	0.295925		4.42691	0.849739
0.05179	0.194921		0.419759	0.12582
0.013354	0.22462		0.480884	0.210494
0.662562	0.106635		0.332343	1.17242
0.005957	0.535646		2.1659	0.304976
0.49403	0.004021		0.041766	0.419625
0.067803	0.005529		0.292465	0.819803
1.25359	0.005589		0.332504	1.22165
0.350295	0.155167		1.84255	0.383982
0.29474	0.002959		0.338879	0.243083
0.190524	0.301437		0.272967	0.006553
1.5829	0.306162		1.04638	0.255621
0.393294	0.520314		4.65839	0.240447
0.002767	0.755293		3.74382	0.113901
0.139624	0.86029		0.381781	0.04097
0.335398	1.06596		0.741349	0.111153
0.35815	0.00485		0.576098	0.147605
0.16391	0.48429		4.45737	0.037565
0.493336	0.468392		4.35217	0.353114
0.007294	0.434547		1.04815	0.362835
0.550593	0.212338		0.368621	0.789701
0.826991	0.00525		0.152478	0.105198
0.002327	0.004955		0.869359	0.642042
0.017796	0.282063		0.639486	0.258296
0.417347	0.122249		1.01514	0.134921
0.067448	0.257222		0.33696	1.03125
0.449797	0.47212		1.14042	0.454249
0.012857	0.414319		3.09685	0.077923
0.337649	1.01314		3.1816	0.77524
0.485933	0.115749		0.358908	0.587298
0.035858	0.611704		1.88109	0.483668
0.005709	0.064041		0.842547	0.056179
0.388854	0.068609		0.044781	0.158764
0.158178	0.138375		0.504261	0.212358
0.00442	0.499427		1.5658	0.216261
0.238703	0.096261		5.82165	1.05862
0.287044	0.100801		0.819803	0.605037
0.711073	0.005599		2.63493	0.649971
0.429024	0.005644		5.20577	0.727105
0.338395	0.04086		0.902344	0.81247
1.05845	0.316187		0.613013	0.360249
0.938115	0.511803		0.666292	0.383909
0.378913	0.053648		0.025436	1.58736
0.102455	0.058212		0.00447	1.35593
1.29507	0.061054		3.20486	0.937968
0.47009	0.270744		1.40928	0.381697
0.246396	1.41026		0.310324	0.158725
1.85452	0.288029		0.307031	0.358972
0.800247	0.086298		0.394752	0.107905
0.203013	0.015661		0.246857	0.371827
0.570145	0.056708		0.210704	0.931086
0.236737	0.019247		0.150184	0.251153
0.061182	0.066588		0.003977	0.082247
0.363941	0.241735		3.65541	0.056829
0.255069	1.52234		0.188864	0.76808
0.2889	0.556777		0.355091	0.091102
1.05434	0.333438		0.00399	1.54788
0.430136	0.198483		1.025	2.73141
0.053761	0.016201		0.026534	0.814166
0.106235	0.253866		1.00805	0.649956
0.964573	0.16378		0.585215	1.18796
0.028185	0.005102		0.309678	0.5135
0.848766	0.131567		3.18555	0.178857
0.285869	0.006326		0.060666	0.654709
0.185492	0.051563		0.626608	0.144186
1.27463	0.033843		0.311844	1.33933
0.04039	0.458632		0.80803	0.069857
0.070208	0.309221		0.244015	0.051396
0.569427	0.005008		0.321422	0.480662
0.241659	0.154597		0.861667	0.216288
0.146692	0.025563		1.67666	0.098362
0.314166	0.005575		2.34715	0.489015
0.771016	0.632616		2.77853	0.246109
0.568295	0.047612		0.433989	0.494943
0.019708	0.007095		1.80449	0.126513
0.025506	0.00585		0.806328	0.316796
0.406044	0.092545		0.451805	0.151624
0.046946	0.35805		2.46886	0.519705
0.062768	0.033555		1.51402	0.469042
0.822255	0.015311		0.506585	0.222776
0.302423	0.054252		3.95814	0.321733
0.64614	0.308418		0.955912	0.234917
0.81318	0.008027		0.209168	0.552504
0.915485	0.004487		1.47792	0.38207
0.582561	0.047633		0.586061	0.852371
0.091657	0.186621		0.850915	0.03753
0.855764	0.211323		0.659069	0.292969
0.506367	0.004423		0.452683	0.241161
0.982427	0.042809		1.07157	0.431191
0.439102	0.011698		0.386327	0.279417
0.25141	0.038287		0.266646	0.354889
0.337459	0.006402		1.89737	0.747536
0.732224	0.006255		0.545534	0.264185
1.03855	0.119986		0.750939	0.095959
0.056499	0.004491		0.030541	0.830161
0.177455	0.226796		2.46126	0.200216
0.306403	0.004793		0.004124	0.25309
0.774066	0.003646		4.21986	0.271776
0.08058	0.03101		0.587666	0.167044
0.363137	0.005132		2.16017	0.053652
0.211115	0.005995		0.003884	0.346647
0.82733	0.046658		0.937522	0.039654
0.382772	0.497977		1.61549	0.353197
1.53608	0.006896		0.001118	0.22765
0.948598	0.100876		0.017753	0.24371
1.21974	0.061716		2.48152	0.639926
0.54109	0.006166		0.007774	0.786679
0.217059	0.002885		0.00442	0.256606
0.45277	0.00471		0.104723	0.411851
0.39835	0.007957		0.174914	0.723844
0.601648	0.003553		0.432797	0.393704
0.739127	0.048031		0.006066	0.222681
0.596154	0.005734		0.70988	0.024552
1.04865	0.006822		1.89622	0.179465
0.181133	0.010739		4.65824	0.34551
0.154941	0.00544		4.07535	0.045629
0.544589	0.023701		0.411855	0.398524
1.93545	0.005047		0.488227	0.258503
0.863452	0.591718		0.513935	0.03195
0.548407	0.281506		5.83771	0.585387
1.48445	0.004595		0.280827	0.504274
0.410625	0.018239		0.004723	0.21802
1.85348	0.004532		0.002706	1.08951
2.28807	0.005762		0.004593	0.091635
0.791113	0.668819		0.003658	0.599052
0.268237	0.003956		1.03653	0.205692
1.86874	0.022622		2.29179	0.179813
0.261052	0.003463		0.360135	0.23304
0.58065	0.007234		0.003015	0.103777
0.124508	0.007293		0.007915	0.240717
1.11194	0.004916		5.51686	0.237262
0.990237	0.004459		1.20509	0.493764
1.22996	0.004511		0.004841	0.304714
0.95337	0.028071		0.131202	0.625557
1.80042	0.173899		0.00617	0.207391
0.100071	0.019391		6.0919	0.264087
2.53523	0.00231		4.41734	0.033271
1.27711	0.034622		5.07198	0.453663
0.488295	0.006319		0.111988	0.617033
0.210267	0.009732		0.00336	0.169373
0.333983	0.006723		3.37913	0.2096
0.414343	0.045673		0.555202	0.185578
0.14861	0.005746		1.33662	0.561799
1.6421	0.004351		1.69897	0.901983
3.56153	0.030362		0.145999	0.254789
0.566408	0.009186		0.55819	0.114797
0.260178	0.012777		0.329151	0.002107
0.754547	0.003641		0.378539	0.827343
0.417648	0.006659		0.313814	0.8186
1.97581	0.004242		0.334562	0.443274
0.874364	0.011928		1.83447	0.427603
1.9034	0.102035		5.97826	0.382601
0.737726	0.007706		3.15289	0.166273
0.642376	0.005747		2.05502	0.499216
1.85224	0.02416		0.004996	0.389615
1.55056	0.026272		0.12126	0.165241
0.866947	0.004041		0.261306	0.581353
0.875991	0.004411		0.133709	0.539058
0.817799	0.005269		2.60993	0.89732
1.16234	0.656257		0.205868	1.05186
1.61931	0.03304		0.107428	0.426627
2.14646	0.005153		0.088872	0.937454
1.84696	0.008514		2.70329	0.46366
0.378091	0.03869		0.423353	0.076301
1.78087	0.010207		2.13479	0.130785
0.976261	0.024598		0.187895	0.808314
0.564086	0.240208		0.294971	0.463227
0.726766	0.019273		0.314354	0.04565
0.608216	0.008349		1.85541	0.037059
2.05073	0.011971		0.007585	0.321785
0.762962	0.454393		0.298634	0.246048
2.36759	0.04979		0.523303	0.743879
3.75407	0.706206		0.002835	0.316033
2.56907	0.147483		0.00481	0.280363
1.94078	0.039249		0.001786	0.828635
0.262414	0.026266		0.009231	0.102816
0.710221	0.069627		0.746953	0.747915
0.698803	0.318799		0.485032	0.370572
0.458001	0.102949		5.60092	0.081675
3.94084	0.013384		2.24719	0.063005
1.57917	0.008236		0.296344	0.206157
1.28599	0.006395		0.263633	0.083906
1.67687	0.016626		0.370663	0.41963
0.912865	0.004025		0.5172	0.715655
1.8076	0.006096		1.43607	0.334691
1.49851	0.009502		0.017244	0.417056
0.925799	0.00537		1.41583	1.37549
0.247617	0.499913		0.231648	0.103595
0.859238	0.00551		0.343312	0.185349
3.24505	0.006316		0.021879	0.461154
2.20451	0.01583		5.59238	0.402084
1.34504	0.003801		0.080255	0.72266
2.45998	0.00334		2.12412	1.09447
0.529605	0.005586		1.19645	1.17441
2.35969	0.020191		0.791269	0.677077
1.83981	0.004512		6.1109	0.596322
0.766757	0.005657		0.163863	0.148671
0.232035	0.224578		0.099701	0.779824
1.77262	0.014722		0.132193	0.064814
0.340151	0.125611		1.09533	0.121493
3.06899	0.007977		1.64118	0.597554
0.680404	0.259157		0.599096	0.138892
1.07409	0.021607		0.054597	0.11171
0.918985	0.005769		0.406544	0.405505
0.413108	0.004675		0.222732	0.236325
2.47557	0.003959		1.66879	0.037582
0.341944	0.004075		0.596012	0.062312
0.32409	0.401097		1.30872	0.659698
1.25892	0.015887		2.54343	0.208887
1.63814	0.005866		0.262798	0.22028
0.704039	0.024587		0.47712	0.034173
2.60415	0.004493		0.694186	0.086268
1.02887	0.006127		1.21339	0.083559
1.80034	0.003758		4.8735	0.54088
0.218172	0.002624		3.66152	0.589018
1.65846	0.008114		1.95557	0.047524
1.95341	0.321041		3.16541	0.167279
0.652886	0.00792		1.20177	0.048185
2.13146	0.004024		0.358342	0.050267
1.05665	0.534529		0.468491	0.192738
2.12652	0.006799		0.26952	0.708833
1.22425	0.047907		0.01888	0.076447
2.37038	0.007556		0.012114	0.181865
1.52474	0.003771		1.51955	1.1231
0.683567	0.00759		0.02166	0.333673
3.91272	0.004355		0.315001	0.074025
1.75581	0.008875		0.129684	0.129119
1.40639	0.009879		0.024665	0.038582
0.395364	0.004756		0.632476	0.065282
1.08052	0.022598		0.007999	0.085735
3.47786	0.012852		0.116732	0.216491
1.27049	0.005693		0.20602	0.233497
1.20599	0.065901		0.462126	0.576184
1.3782	0.006529		1.76811	0.888553
1.14867	0.022515		0.040549	0.124222
1.03842	0.007155		0.383646	0.027057
1.03036	0.006164		0.851149	0.328868
1.24936	0.005043		0.042516	0.117884
1.48511	0.00722		0.002835	0.114748
0.843086	0.145795		0.030357	0.985721
0.464625	0.020788		0.026077	0.01137
1.54244	0.008391		0.009064	0.367342
1.06661	0.01624		0.836485	0.031311
0.200126	0.132186		0.006531	0.338086
0.496496	1.5816		0.041166	0.258823
1.55472	0.003398		0.455643	0.079902
1.70287	0.024627		0.217503	0.249657
1.0367	0.003305		0.407684	0.419902
1.40955	0.575168		0.930169	0.274793
1.46567	0.009509		0.005186	0.441004
0.236586	0.00801		0.056057	0.490517
1.55349	0.00544		0.009441	0.296895
0.467819	0.066161		0.98657	0.120968
1.28027	0.010674		0.024956	0.026475
1.85026	0.007244		3.96906	0.249627
0.761751	0.018552		0.604654	0.791331
0.423988	0.137758		0.864538	0.42888
1.65591	1.67768		2.3676	0.206633
1.43722	0.061501		1.43437	0.360092
0.504308	0.101224		0.223617	0.378107
0.368214	0.1961		4.01954	0.020729
0.582083	0.011321		0.352631	0.068662
0.572153	0.040588		0.009206	0.148027
0.427746	0.007795		0.922496	0.518124
0.214187	0.069426		0.015525	0.353126
0.466737	0.310083		2.14255	0.114888
3.57487	0.132183		0.013775	0.162484
1.54016	0.145657		2.05112	0.111118
1.45436	0.173266		0.011386	0.313703
0.455411	0.120593		0.012367	0.624569
0.3884	0.003674		3.82152	0.7206
2.45767	0.003357		0.986507	0.118014
0.476757	0.00589		3.21755	0.370291
1.8495	0.007901		0.226066	0.108171
0.329542	0.012258		2.63787	0.169804
0.729405	0.003141		5.25481	0.645659
0.592764	0.291314		0.244559	0.046465
1.12574	0.00539		0.495361	0.329852
1.36933	0.171368		3.02393	0.138251
0.294694	0.004925		0.380497	0.134859
0.396735	0.078935		5.94122	0.203127
1.57021	0.008568		0.955684	0.257918
0.327282	0.042088		1.40224	1.3068
0.558694	0.006677		0.154601	0.267261
0.263152	0.004998		0.792707	1.00581
0.664498	0.006243		0.28891	1.20816
0.151347	0.007698		0.085765	0.184927
1.20766	0.009315		0.265238	0.173122
3.28279	0.158303		5.71634	0.679874
0.481419	0.007982		1.55039	1.2778
0.483683	0.008863		0.358895	0.51644
0.009963	0.028407		0.863203	0.893102
0.772224	0.007129		0.288966	0.716264
0.192276	0.007676		3.11611	0.066695
0.25104	0.005662		0.261458	0.342033
1.91804	0.007426		7.01236	0.42539
0.450047	0.006167		0.40068	0.133037
0.236132	0.093836		0.840993	0.961061
0.901023	0.147566		0.003155	0.743362
0.121045	0.004298		0.016796	0.072896
2.78901	0.007957		1.08379	0.47329
1.60207	0.005093		0.002209	0.818491
0.512632	0.222117		0.158684	0.009672
0.366634	0.00546		0.524338	0.165282
1.37955	0.00594		0.16028	0.09526
3.64062	0.446646		1.58543	0.870654
2.62061	0.009822		0.002206	0.77215
2.44649	0.020604		0.210701	1.04331
0.453212	0.0049		1.71389	0.06851
0.498979	0.004687		1.43722	0.286375
0.041505	1.31148		0.3233	0.103564
0.312411	0.004899		0.349913	0.602721
0.024558	0.061864		0.299427	0.284241
0.18567	0.043375		0.113373	0.38187
0.320084	0.004912		1.07592	0.028046
1.29245	0.011713		0.135	1.0803
0.173881	0.004482		2.07374	0.581509
0.029509	0.004348		0.509483	0.135309
0.120706	0.005253		0.137753	0.075473
0.584175	0.065437		1.15531	0.24567
0.953404	0.006389		0.358873	0.287413
2.25828	0.122518		1.80088	0.750276
0.181577	0.005074		0.995649	0.658905
0.18657	0.005213		0.069208	0.658773
0.906807	0.009509		0.392499	0.965067
0.239485	0.269375		0.503501	0.612654
0.042477	0.006186		1.19561	0.358544
0.037277	0.004113		1.20158	0.694026
0.370765	0.811688		0.412189	0.73182
0.667097	0.004151		6.65119	0.018194
0.04733	0.064477		2.3326	0.34452
1.50593	0.007429		1.2807	0.60417
0.591268	0.005465		0.048136	0.182588
0.040236	0.20562		1.43674	0.893653
0.505815	0.285171		3.01045	1.03337
0.904689	0.025524		1.62716	0.221169
0.110392	0.004945		0.635534	0.26474
0.052214	0.050787		1.19849	1.85
1.08544	0.237066		0.002337	0.622436
0.022362	0.023607		0.840191	0.166696
1.4462	0.611535		0.002481	0.163803
0.290369	0.223424		1.2669	0.052141
0.226069	0.846973		0.007986	0.278714
0.128813	0.040165		1.19006	0.492115
0.017466	0.553232		1.4091	0.228797
0.020421	0.106201		2.04446	0.296386
2.327	0.005885		0.464248	0.054852
0.026117	0.00663		4.3427	0.366396
0.01689	0.763594		0.426852	0.412457
1.16891	0.247725		4.73762	0.02453
0.020221	0.256171		0.272503	0.019814
1.1885	0.012279		0.878569	0.575744
0.91481	0.007959		3.01778	0.112042
1.02735	0.004774		1.60716	0.238938
0.033134	0.006571		0.183564	0.160293
0.140475	0.185337		0.037833	0.275437
0.065955	0.057692		0.693996	0.094648
0.342544	0.159927		2.00597	0.025299
0.639282	0.496499		2.48178	0.256414
2.4642	0.705364		0.745523	0.063128
0.172336	0.392668		1.96471	0.210821
0.161028	0.540638		0.299754	0.151715
0.709723	0.183052		0.366593	0.054203
0.046549	0.047166		4.52797	0.591765
0.03033	0.576624		0.066308	0.133905
0.11923	0.112152		1.61407	0.451498
0.012893	0.004116		8.91949	0.006275
2.17372	0.083878		6.07985	0.055528
0.039823	0.07486		3.96332	0.073646
0.897633	0.145612		3.7188	0.082541
0.153759	0.055032		0.161782	0.884921
0.027922	0.15736		0.062181	1.63626
0.193617	0.04132		0.017029	0.063864
0.05004	0.493385		0.004137	0.184492
0.43272	0.103161		0.20904	0.007116
0.484275	0.202681		0.048123	0.593501
1.4566	0.116719		0.014672	0.107539
0.031642	0.076056		0.033474	0.093481
0.209607	0.054613		1.16045	0.005489
0.070329	0.516572		0.007724	0.212015
0.0233	0.171827		0.841057	0.09008
0.027869	0.062881		0.094842	0.261637
0.746313	0.30011		0.561634	0.054561
0.019698	0.314379		0.034287	0.075596
1.66355	0.08577		0.016944	0.053447
0.212884	0.385976		0.113052	0.07588
0.042739	0.442073		0.274607	0.056269
2.43733	0.752423		0.280048	0.154949
2.09208	0.961429		0.0064	0.079592
1.01893	0.826273		0.075016	0.06226
1.03348	0.051346		0.711473	0.41132
0.916388	0.04047		0.010224	0.167503
0.928901	0.469586		0.02893	0.307965
1.03414	0.109666		0.295071	0.230473
0.529229	0.075294		0.641844	0.072105
4.32525	0.333474		0.008383	0.503369
0.843475	0.429044		0.080327	0.094697
1.15501	0.159712		0.609268	0.05921
0.568601	0.307365		0.146817	0.21934
2.05084	0.150371		0.023013	0.140307
1.79758	0.311203		0.292642	0.010573
0.395041	0.976957		0.034756	0.438883
1.2758	0.245115		0.012157	0.181805
0.945192	0.380234		0.315948	0.657572
0.79808	0.562058		0.271668	0.281554
1.66271	0.174173		0.01154	0.764017
0.734274	0.204685		0.032537	0.018524
0.319314	0.847657		0.26526	0.028339
2.8752	0.356471		0.19818	0.06888
3.3679	0.440442		0.200198	0.190471
2.18707	0.915766		0.170525	0.315617
2.88007	0.22194		0.37494	1.98664
1.25483	0.297135		0.041828	0.039014
1.68983	0.627517		0.00387	0.133789
1.21891	0.353722		0.755578	0.058731
0.557436	0.153449		0.289104	0.031766
1.86192	0.181993		0.055174	0.461736
0.99017	0.469919		0.00916	0.39554
2.06345	0.31857		0.348483	0.12889
0.31818	0.243894		0.093118	0.192191
0.164418	0.092857		0.168413	0.00878
1.05667	0.266765		0.040224	0.33652
1.00788	0.413675		0.002229	0.027804
0.354302	0.34803		0.402387	0.495386
1.13691	0.123483		0.00592	0.146625
0.84389	0.292135		0.018343	0.072998
2.70464	0.184853		0.044286	0.393962
2.67141	0.337101		0.024238	0.193995
1.04242	0.261206		0.53325	0.002894
0.599297	0.109184		0.033417	0.009382
1.70903	0.574276		0.476743	0.7693
1.54378	0.443409		0.259821	0.055867
0.729659	0.00404		0.224216	0.004023
0.335802	0.165146		2.64981	0.150705
0.697145	0.244161		0.16995	0.286287
0.387444	0.460931		0.004004	0.858042
0.516784	0.142848		0.256219	0.569088
0.215475	0.176449		0.003092	0.004727
0.91178	0.251655		0.542778	0.17633
0.442938	0.656215		0.49843	0.008898
0.71072	0.005281		0.123333	0.249353
0.52975	0.182073		1.11391	0.303313
0.450932	0.802146		0.415776	0.126223
0.56752	0.74751		0.006327	0.067399
1.85936	0.301327		0.105594	0.077521
1.77812	0.318378		0.055181	0.021094
0.713906	0.661743		0.026396	0.030238
0.508448	0.151469		2.23477	0.036216
1.79788	0.221297		0.053882	0.496787
0.396546	0.124186		0.002305	0.239205
1.03017	0.240981		0.091379	0.37471
0.748741	0.860463		3.34138	0.119027
0.697607	0.151308		0.19722	0.195764
0.017333	0.57953		0.044477	0.454035
0.938469	0.147377		0.027682	0.249494
1.40488	0.082928		0.058691	0.055327
0.581705	0.081924		0.006356	0.004702
0.200908	0.429867		2.00516	0.337354
0.989269	0.162679		0.00311	0.006378
3.58528	0.111902		0.00263	0.047277
0.015113	0.323688		0.019011	0.004604
1.01506	0.07473		1.42565	0.473499
0.170702	0.071489		0.002362	0.04599
0.611456	0.919794		0.009431	0.003515
0.433365	1.01013		3.27889	0.39542
0.043606	0.16817		0.114087	0.005143
1.45623	0.005443		1.19294	0.198706
0.460853	0.007516		0.002226	0.010532
0.811732	0.277199		1.20882	0.037335
3.98109	0.222286		0.002725	0.214266
0.485012	0.732514		0.002	0.346018
1.75382	0.066742		0.003194	0.053899
1.36895	0.007472		1.86672	0.362384
0.032135	0.008301		0.002006	0.006441
0.868221	0.005374		0.002586	0.004032
0.660805	0.036594		0.003312	1.07157
0.015637	0.005895		0.002379	0.049743
0.114167	0.00634		0.010178	0.004469
1.12741	0.012637		0.00209	0.006136
2.20647	0.019713		0.007229	0.079649
0.935657	0.163858		0.008694	0.048397
0.987191	0.031772		3.70589	0.006964
1.12922	0.022833		0.004238	0.047494
0.212959	0.017624		1.61001	0.125563
0.785892	0.00606		0.061702	0.004063
0.150206	0.005477		0.025366	0.489335
0.860343	0.004956		2.39984	0.078506
4.94465	0.0992		1.20523	0.450178
0.00718	0.024715		0.005489	0.593107
0.105316	0.006438		0.001734	0.004127
1.67412	0.042324		0.102761	0.003513
1.33504	0.007273		0.364288	0.548269
0.473854	0.01196		0.002063	0.609331
4.21316	0.014315		0.007885	0.111201
0.094658	0.007524		0.001859	0.068624
0.647809	0.013613		0.060996	0.004275
0.013361	0.055063		3.90014	0.484251
1.10678	0.005032		1.28692	0.035047
0.406206	0.006043		0.13702	0.003246
0.432868	0.032647		0.641621	0.07575
1.67814	0.00314		0.006055	0.54002
1.30777	0.008737		0.017177	0.140783
1.4169	0.012931		0.009039	0.066506
4.4611	0.006845		0.005444	0.006196
0.989884	0.007587		0.232848	0.202444
1.35884	0.028848		0.827616	0.627034
0.824088	0.006766		0.004161	0.495461
0.455978	0.005649		1.12963	0.0054
0.590273	0.220049		0.85682	0.082157
0.83375	0.006202		0.023594	0.546528
0.739169	0.004862		0.011366	0.054756
0.871291	0.082211		0.134639	0.00335
0.010624	0.004857		0.06572	0.40843
1.06868	0.139949		2.59403	0.257334
0.121253	0.008195		0.023656	0.360253
0.0174	0.013473		1.09528	0.108094
0.989227	0.015292		0.754108	0.042518
0.709962	0.00656		0.657822	0.226718
0.736213	0.008379		3.0137	0.004897
0.242303	0.005877		0.008418	0.003764
0.095683	0.117112		0.015511	0.063861
3.8438	0.009213		1.17972	0.544565
2.10764	0.069146		0.237722	0.189538
0.258793	0.005269		0.009152	0.033373
0.011283	0.19888		0.011437	0.003633
0.068423	0.003121		0.25779	0.387501
0.066549	0.04942		1.55892	0.087073
1.60396	0.004411		0.28943	0.004975
2.192	0.005509		0.22119	0.723295
0.56881	0.00976		0.007372	0.003487
0.761298	0.012269		2.43192	0.041674
0.484487	0.02225		0.037747	0.032514
1.61213	0.005568		1.66193	0.573666
0.085267	0.007423		0.008101	0.097846
0.495177	0.01983		1.33837	0.075567
1.02426	0.01375		0.574833	0.079224
0.313268	0.005173		0.028172	0.63429
2.64988	0.004267		1.3171	0.091665
1.2145	0.010742		0.004285	0.358748
0.543706	0.006994		0.378051	0.192955
1.96501	0.003451		0.809445	0.375997
0.884639	0.079001		0.056021	0.890051
1.49731	0.004669		0.043027	0.632781
0.923033	0.005402		1.10034	0.096206
0.23056	0.005649		0.039408	0.208341
2.89146	0.009379		0.178257	0.12091
1.1132	0.038999		0.468002	0.302622
1.20618	0.005801		3.01272	0.062539
1.00327	0.00533		0.971809	0.003983
1.01073	0.026895		0.050638	0.112422
0.044197	0.003401		1.03608	0.003508
0.833083	0.003448		0.101287	0.043841
0.899349	0.00563		0.013245	0.089463
1.03937	0.004672		1.46815	0.165793
0.26324	0.008083		0.391483	0.231944
0.988479	0.003736		0.838234	0.261788
2.25648	0.005268		0.195087	0.00567
1.15461	0.005124		0.117005	0.011337
0.614788	0.005521		0.322292	0.188898
1.15225	0.004848		0.016046	0.461182
1.26274	0.004832		0.152098	0.422055
0.453204	0.007848		0.169872	0.274084
1.06622	0.006832		0.268578	0.243988
0.069858	0.004824		0.176147	0.260357
0.809517	0.004601		0.257409	0.714085
0.637138	0.004676		0.195977	0.592357
1.86195	0.005272		0.027332	0.022321
0.573305	0.004611		1.11366	0.083872
1.29701	0.00333		1.94579	0.002067
0.360539	0.020568		1.05845	0.054484
1.65611	0.017703		0.026096	0.121088
0.065685	0.009983		0.34521	0.116908
0.117756	0.007703		0.252154	0.185122
1.26776	0.068691		0.785105	0.002519
0.498234	0.005365		0.215113	0.001966
2.26897	0.003528		0.060629	0.004325
0.060816	0.005169		0.004984	0.565112
1.51862	0.025728		0.011506	0.001726
0.812301	0.003964		0.020643	0.632974
0.098651	0.27982		0.009925	0.406196
0.007124	0.012984		0.225489	0.502416
1.35998	0.387589		0.007723	0.003176
1.09123	0.004592		0.548349	0.030076
1.02085	0.006589		0.001592	0.586891
0.011081	0.005035		0.005892	0.035263
0.969379	0.138411		0.784706	0.014656
0.06239	0.003676		0.020016	0.305816
0.062539	0.011032		0.043969	0.021093
0.05535	0.150751		0.009514	0.055233
2.51577	0.338836		0.412203	0.038854
0.391642	0.013455		0.650004	0.033397
0.628655	0.702841		0.004858	0.270014
0.404944	0.225029		0.529802	0.365077
0.71427	0.259857		0.005013	0.193553
0.089355	0.079934		0.008652	0.058916
0.006806	0.004224		0.130929	0.180987
0.005248	0.002969		0.007719	0.055275
0.023254	0.003739		0.082146	0.039517
1.0638	0.006297		0.005157	0.784023
0.873033	0.025227		0.00427	0.448448
0.203088	0.005729		0.009554	0.008822
0.080436	0.008998		0.059022	0.177145
0.391826	0.027413		0.443912	0.90391
1.23853	0.077002		0.601472	0.292565
0.105498	0.116735		0.007465	0.231041
0.003761	0.005747		0.023195	1.63337
0.284975	0.005851		0.009701	0.058448
0.565944	0.030825		0.604901	0.088182
0.028831	0.007844		0.010557	0.328165
0.474198	0.007988		0.022806	0.555529
0.007496	0.00446		0.34411	0.082985
0.360803	0.027325		0.01102	2.39955
0.816143	0.008974		0.132031	0.63186
1.55912	0.003422		0.01082	0.530091
0.063519	0.717937		0.310184	0.408258
0.364039	0.002886		0.009681	0.335587
0.007174	0.003156		0.24886	0.812444
1.36119	0.003555		0.463205	0.61362
1.78992	0.007453		0.037368	0.092804
0.005352	0.003534		0.030139	0.245269
2.3837	0.005411		0.436279	1.2714
0.017022	0.032002		0.019264	0.882409
1.43189	0.006304		0.006898	0.082128
0.47821	0.069687		0.614564	0.126786
0.278137	0.004888		0.33877	0.100878
0.005424	0.003902		0.21011	0.162143
0.660694	0.118526		0.276082	1.26892
0.272511	0.004958		0.585456	0.459082
1.63112	0.022858		0.008089	0.404476
0.365487	0.731682		0.665897	0.822705
1.82372	0.003617		0.012313	0.120141
0.436263	0.333838		0.07479	0.427138
0.472023	0.008223		0.04416	0.488256
0.053358	0.012467		0.006222	0.160262
0.866636	0.008511		0.689171	0.509548
0.342388	0.022933		0.258038	0.35688
0.135265	1.30501		0.051213	0.35137
0.002886	0.004586		0.128689	0.423184
0.009769	0.004701		0.021031	0.246257
0.003607	0.006891		0.651293	0.228664
0.251286	0.003248		0.688457	0.294102
1.19616	0.003086		0.020864	0.701539
1.34128	0.300894		0.355075	1.0838
0.280469	0.16962		0.092147	0.518023
0.16029	0.01749		0.013379	1.86361
0.552765	0.546226		0.408537	0.538567
0.099572	0.15341		0.077574	0.104139
0.005168	0.018017		0.676328	0.352546
0.299456	0.004491		0.289535	0.218219
0.007975	0.007232		0.167414	0.089681
0.254938	0.236577		0.0574	0.397505
0.154471	0.004473		0.030732	0.049417
2.10959	0.004464		1.17714	0.202285
1.05438	0.424189		1.90575	0.067242
0.011936	0.006005		0.667757	0.152012
0.146257	0.013257		0.570008	0.377275
1.40055	0.193281		0.036044	0.529387
1.03566	0.104085		0.567441	0.214518
0.975417	0.251344		0.029715	0.230261
0.100386	0.006327		0.049949	0.145719
0.982989	0.021189		0.192746	0.224539
0.453953	0.170732		0.026914	0.347645
1.52907	0.653815		0.218756	0.99956
0.587541	0.98505		0.477932	0.086276
1.24218	0.49501		0.875985	0.324332
2.2661	0.00789		0.169922	0.039586
3.24444	0.01634		0.038087	0.783881
0.842453	0.679609		1.03296	0.121482
1.84294	0.733065		2.75186	0.056506
0.974137	1.04929		0.684639	0.09497
0.602152	0.016281		0.73604	0.441751
0.898094	0.818343		0.592835	0.208978
0.165406	0.395874		0.183816	0.093022
1.60599	0.642835		0.006357	0.118088
0.841163	0.24227		0.109993	0.143681
0.03472	1.00194		0.188361	0.361447
0.870625	1.11777		0.506555	0.04901
0.007426	1.92702		0.495406	0.056808
0.716134	0.731746		0.53673	0.055997
1.73835	0.312732		0.423001	0.392516
0.047592	0.375007		1.02378	0.151643
0.630081	1.21202		1.54451	0.227595
2.01106	0.027384		0.187092	0.568087
0.61575	0.581596		0.065546	0.743656
0.019914	0.443749		1.58258	0.064983
0.99344	0.136561		0.104307	0.10581
3.70451	0.009918		0.503225	1.17299
0.310833	0.195874		0.589262	0.15997
2.47106	0.361103		0.343169	0.134412
2.22895	0.404836		0.462848	0.043823
3.92739	0.235984		0.610116	0.056475
0.368649	1.27635		1.11567	0.330683
1.99436	0.339054		0.142599	0.217358
1.15963	0.076679		0.069974	0.104493
0.016196	0.445958		0.673609	0.696672
0.331344	1.96439		0.53941	0.098786
1.56325	1.14028		0.187793	1.03549
2.1889	0.44309		0.680839	0.085275
0.693103	0.086239		1.62993	0.764097
4.06811	0.380596		0.297357	0.052009
2.05406	0.894653		0.56408	0.103215
0.028564	0.219617		0.082944	0.053257
4.23947	1.75115		0.324923	0.068443
0.036575	0.102233		1.0535	0.037091
2.46303	1.18604		0.239666	0.142344
1.24328	0.097267		2.49879	0.180835
0.573583	0.120227		0.911217	0.141899
1.07802	0.133535		0.992999	0.824571
0.843914	0.516564		0.261837	0.063816
1.26664	0.46528		0.117503	0.80333
1.16512	0.931454		0.817218	0.079358
0.388109	0.464885		0.187248	0.063605
0.590733	0.57037		0.26232	0.435506
0.003913	0.362477		0.413325	1.30575
0.752061	1.3327		0.335374	0.699039
0.005146	1.07426		1.1363	1.56116
0.521109	0.170542		0.483612	0.331352
0.014974	0.477297		0.340973	0.455073
4.66311	0.084284		0.136323	0.571024
1.73465	0.135652		0.340499	0.229628
0.221243	0.15839		0.464419	0.076959
1.21104	0.32755		0.255402	0.117701
1.57521	0.607103		0.76245	0.635189
3.18901	0.077828		0.843389	0.197143
3.16508	0.154208		0.32018	0.086922
0.777638	0.172347		0.342553	0.074088
2.77946	0.751372		0.037988	0.545909
0.00292	0.007012		0.661884	0.222122
0.003664	0.008319		0.865449	0.368798
1.23668	0.008521		0.773409	0.105449
0.004537	0.285104		0.060988	0.722586
0.306144	0.092225		1.86054	0.358942
0.663227	0.00545		0.788983	0.382412
0.643368	0.012554		0.123106	0.729835
0.878198	0.007753		3.98547	0.255876
1.94127	0.157976		0.27909	0.466613
0.143638	0.20257		0.193219	0.136972
3.94732	0.008486		0.102171	0.272816
0.193401	0.028447		1.15161	0.030731
0.010074	0.005038		1.27268	0.405232
0.048715	0.007192		0.101636	0.156121
0.041892	0.004907		0.419832	0.012003
0.004043	0.007581		1.19396	0.313079
1.36443	0.042337		2.50625	0.065019
0.341257	0.053216		0.403137	0.185965
0.078177	0.017013		0.362246	0.035136
0.014133	0.010047		0.412541	0.067113
0.026833	0.017397		0.875035	0.060596
0.005498	0.009778		0.492644	0.19981
1.01053	0.284143		0.428669	0.339323
1.59177	0.008489		0.058749	0.248824
1.10924	0.108013		0.177757	0.191706
0.904046	0.011787		2.68352	0.277891
1.73206	0.034976		1.14545	0.049145
2.72634	0.010457		0.580249	0.405249
0.253668	0.571964		1.77328	0.21036
1.28236	0.018922		2.54936	0.157745
0.544442	0.486386		0.111049	0.208149
0.6631	0.006288		1.51333	0.164294
0.630337	0.012937		0.356899	0.327933
1.04432	0.012927		0.222133	0.243474
0.23084	0.032663		2.38516	0.150111
0.512032	0.724209		0.560073	0.267957
0.925198	0.534495		0.085486	0.245313
1.65856	0.010681		0.461873	0.185523
0.058359	0.015485		0.519767	0.159877
0.794453	0.007127		0.342372	0.397605
0.010971	0.019607		0.055017	0.008819
0.908667	0.009092		0.244932	0.098885
0.007506	0.021958		0.04525	0.109363
0.119838	0.012253		0.309385	0.086282
0.216872	0.034471		0.044757	0.073551
1.31551	0.009362		0.416524	0.079604
0.004928	0.43841		0.008146	0.482627
1.4957	0.004592		0.238284	0.411124
0.093581	0.018709		0.076852	0.06942
0.265009	0.227987		0.241981	0.006988
4.91509	0.715985		0.047725	1.24564
4.08863	0.677127		0.017765	0.137118
0.037764	0.009356		0.028137	0.082271
3.71384	0.173109		0.024783	0.300382
0.160532	0.004552		5.52212	0.036131
0.303725	0.006347		0.008238	0.722848
0.055635	0.010173		0.015525	0.116573
0.758308	0.010158		5.45764	0.460778
3.03572	0.267694		0.834504	0.07967
3.82249	0.008149		0.32435	0.140409
1.50958	0.007612		2.41152	0.354058
0.009412	0.279039		1.72887	0.020596
0.008685	0.041065		0.5895	0.249169
3.95512	0.078508		0.494034	0.029274
3.59029	0.063076		0.007675	0.110246
0.12544	0.069464		0.444687	0.089882
0.234679	0.407907		0.606818	0.181489
0.669108	0.00446		1.57833	0.480915
0.50669	0.005617		4.0202	0.027229
0.211326	0.007808		3.7195	0.036397
0.957065	0.007101		0.448648	0.121455
2.63664	0.297206		0.006625	0.292056
1.46475	0.013996		2.61476	0.091993
0.036137	0.015262		2.50838	0.535399
0.611484	0.133994		1.72327	0.294662
0.099402	0.069066		0.952276	0.394387
0.031786	0.006158		0.00758	0.115741
0.031589	0.005837		1.389	0.094167
0.120444	0.009289		1.25514	0.051346
3.20098	0.068686		1.93013	0.041378
0.253451	0.010023		0.497371	0.207461
0.680542	0.040669		0.85886	0.294959
0.003621	0.010227		0.6791	0.085305
0.047074	0.137945		5.37442	0.241402
0.00642	0.008422		0.021414	0.182272
6.13041	0.005454		1.45463	0.884804
0.39299	0.061716		3.77733	0.048201
0.048964	0.004465		1.43751	0.060172
0.042175	0.094343		0.140541	0.113337
2.47266	0.448962		0.020596	0.064763
0.821167	0.098227		0.296276	0.512623
0.766818	0.095664		0.851319	0.039681
1.50926	0.010596		0.051124	0.068662
0.008857	0.015207		0.068529	0.046928
0.122928	0.285419		0.134393	0.076536
1.04238	0.112867		1.47456	0.16278
2.76494	0.022612		0.232027	1.39421
0.126443	0.006437		2.1767	0.169699
1.14095	0.543107		0.298567	0.095024
0.058971	0.414506		0.424722	0.034768
0.523504	0.014336		2.06505	0.02794
0.712455	0.011539		0.032575	0.062024
0.605985	0.097318		0.739429	0.374916
0.689609	0.022616		0.478222	0.032866
1.69417	0.590267		0.048257	0.032687
1.2524	0.071762		0.13466	0.080517
2.17191	0.084602		0.194606	0.084935
3.19576	0.012621		4.95964	0.811466
1.83074	0.306625		0.124545	0.058866
1.71139	0.012821		0.324632	0.280474
1.2532	0.255378		0.552307	0.084126
0.678407	0.006509		0.042812	0.106888
2.44997	0.017394		0.107919	0.050717
0.295643	1.186		0.811942	0.440601
3.46447	0.060907		0.041536	0.072672
0.00607	0.009342		0.628311	0.09628
0.221884	0.363547		0.046366	0.036103
0.687267	1.86678		0.712928	0.168315
2.82286	0.04693		1.26006	0.031134
0.179888	0.011824		0.224242	1.49421
1.7961	0.060452		3.52839	0.241496
0.003913	0.262322		0.008497	0.377489
2.93241	0.801486		0.398889	0.031207
0.989479	0.020315		0.421724	0.055047
0.492297	0.005908		2.4907	0.365217
0.004511	0.313762		0.993177	0.045213
2.02673	0.01114		4.90967	0.029339
2.9148	0.059481		0.517844	0.050332
0.576764	0.077334		0.076577	0.113143
1.38964	0.018974		0.093426	0.025194
3.36727	0.021702		1.27178	0.105782
1.84053	0.049		0.160898	0.049394
0.886391	0.353364		0.585281	0.022171
0.547307	0.163		2.59666	0.148167
0.315307	0.105381		0.90028	0.327176
1.11714	0.202674		0.361891	0.055824
0.169705	0.049112		0.623917	0.036171
1.47484	0.34412		0.007981	0.031841
0.004524	0.029587		0.294322	0.035251
2.34116	0.205462		1.0098	0.369562
1.70847	0.053723		1.0554	0.427796
0.210816	0.403059		0.076383	0.063143
3.58882	0.024937		0.610509	0.034837
0.004517	0.087786		0.316218	0.344735
2.07289	0.690164		0.324901	0.011217
0.007019	0.252515		0.159791	0.095621
2.89743	0.030822		3.93381	0.384154
1.05741	0.01097		1.27065	0.096226
0.948468	0.244612		0.74444	0.339081
0.006015	0.017464		2.66106	1.26064
0.006713	0.010426		1.67941	0.028466
0.00185	0.21129		5.38621	0.051228
3.38039	0.102627		1.15926	0.046174
0.577752	0.355779		0.174849	0.02915
0.800025	0.733483		0.893144	0.172019
1.37925	0.082693		0.012648	0.522987
0.009548	0.35356		5.15168	0.04067
0.773364	0.213199		1.71117	0.247961
0.372716	0.044815		3.41209	0.026453
2.96245	0.383673		4.23885	0.152856
1.1583	0.539023		0.024188	0.245643
0.012353	0.223601		1.23206	0.085158
1.64139	0.005471		0.649565	0.012532
0.001906	0.013399		1.85087	0.369765
2.50228	0.046759		5.02545	0.314778
0.024395	0.057755		4.97141	0.032956
0.550836	0.031435		2.98586	0.200863
1.33349	0.002825		0.140513	0.534069
2.27006	0.065587		1.10357	0.009972
0.00967	0.076252		3.51515	0.091087
0.776413	0.013128		0.09973	0.259283
0.543651	0.028855		0.598369	0.011839
0.423252	0.062643		0.096689	0.081463
2.62113	0.006154		1.7637	0.066944
1.50857	0.07572		0.152359	0.151171
2.08387	0.056162		0.012019	0.018633
0.229683	0.063018		0.011047	0.175813
2.39844	0.039812		2.2804	0.053348
0.756157	0.049867		2.09561	0.180383
1.48479	0.053992		3.64622	0.029257
0.386582	0.035677		0.084952	0.352654
2.46846	0.03315		1.81878	0.01817
1.50995	0.05102		4.21877	1.87224
2.59322	0.081526		1.10178	0.026004
0.569544	0.010102		0.844645	0.059605
0.349887	0.049395		0.034803	0.053633
0.736775	0.066927		5.04837	0.012998
1.09031	0.044855		0.014406	0.727229
0.374119	0.031917		0.035103	0.060363
1.93741	0.033824		0.110607	0.208428
1.1197	0.006235		5.63526	0.065713
0.469108	0.050119		0.011488	0.010295
1.18503	0.108734		0.015736	0.097558
2.03062	0.058892		0.014122	0.13486
0.268279	0.02613		6.92621	0.182089
0.37692	0.031622		0.77614	0.162994
2.04634	0.037554		1.39399	0.091727
5.24425	0.042951		0.056864	0.238008
2.67144	0.050838		3.14528	0.180393
1.42609	0.02423		0.061388	0.101775
1.43647	0.029364		0.049199	0.084932
0.986467	0.051163		0.013549	0.073731
0.832806	0.039786		0.007089	0.130999
2.12975	0.010281		0.392084	0.082228
0.532634	0.092548		1.33476	0.07678
0.329022	0.060071		0.028543	0.202096
3.15787	0.008359		0.315509	0.036193
4.08682	0.005386		1.93838	0.15949
0.467691	0.075989		0.356877	0.021802
2.77718	0.055572		2.06339	0.147975
1.58004	0.068071		0.178631	0.164929
0.384611	0.009782		1.61174	0.171719
0.763408	0.010656		1.18748	0.104005
0.728768	0.049182		0.055075	0.011881
0.650517	0.011076		0.006787	0.048604
1.63465	0.011584		0.060488	0.015306
1.26145	0.007453		0.008267	0.025417
1.33298	0.025592		2.01397	0.443937
5.60095	0.07054		0.803717	0.145882
0.407293	0.022233		0.025839	0.048939
1.30514	0.010817		0.065962	0.179725
0.942813	0.059512		0.128511	0.313148
0.395431	0.021965		0.709017	0.012319
0.985014	0.044533		0.033966	0.086427
1.93448	0.042261		0.095417	0.122023
1.44015	0.083836		2.25032	0.017812
0.668881	0.058663		0.113254	0.215461
0.041323	0.007909		0.370951	0.081342
0.618931	0.042523		0.050168	0.032725
1.16846	0.150535		2.53285	0.044142
[truncated: 2,260 more rows]

## Sheet: Fig. 3m
Fig. 3m	% CER1+ of GATA6+ in YSLCs
Day 2-4			Day 4-6
Control	A83-01		Control	A83-01
45.977	0		31.2057	0
51.8518	4.44444		27.6191	3.15789
40.1961	1.40845		39.3162	0.763359
43.4555	0		49.1525	2.05479
51.1364	2.77778		41.1347	0
76.4706	0		15.7895	17.6471
37.6405	0		58.5586	10.1266
31.25	1.47059		43.2203	7.31707
28.125	0.746269		56.338	6.49351
38.5185	7.69231		41.5205	4.16667
52.1008	0.490196		48.5437	3.7037
42.2222	0.787402		31.8408	1.41844
51.0949	2.32558		41.1347	2.32558
54.5455	1.85185		47.2868	3.06122
52.3529	2.63158		18.1159	1.76991
51.8518	1.68067		36.9565	0.892857
44.1176	2.07469		39.6552	4.5977
50	1.92308		61.017	3.09278
54.4554	0.970874		39.823	1.13636
45.509	2.27273		32.6087	2.0979

## Sheet: Fig. 3o
Fig. 3o	Normalized pSMAD1.5.9 in hESC Spheroids in YSLC Conditioned Media
mTeSR Control	YSLC Control	YSLC+A83
15.5849	8.52277	25.6138
10.413	9.8297	28.7356
11.418	10.0644	25.8172
13.1728	6.8604	19.6644
12.2881	8.47426	28.0195
12.5446	15.2158	23.0966
13.7746	7.44158	26.6195
11.6934	7.66634	24.5195
10.9066	9.11089	22.3092
11.6985	20.2148	15.3579
11.1989	6.68317	19.5065
20.5618	6.37426	17.7503
14.0697	15.398	25.2818
16.4534	6.79901	15.7301
14.8918	7.08416	19.8752
15.99	13.3277	29.688
13.2051	6.60198	27.1643
10.0425	6.92277	27.0088
19.849	5.6703	21.7608
11.7152	8.87921	24.9449
23.5224	11	20.2337
10.5427	9.10693	26.2536
20.1676	7.42871	6.00456
27.3371	12.0723	6.16534
26.0901	13.8822	5.75371
18.7763	16.5416	7.0057
19.5686	29.0958	5.55416
17.1498	37.8519	5.77309
17.4326	26.3092	5.29533
21.6128	35.8807	24.7596
12.6981	32.7483	28.0913
12.8562	38.4103	24.5751
12.6265	21.9896	29.8945
15.1981	16.7709	30.7251
15.1199	15.1542	29.2272
16.528	25.4991	16.9381
10.676	9.05292	15.4342
35.68	11.0658	22.3358
36.7337	8.00882	18.7157
38.5249	9.70081	16.8942
47.5298	10.097	21.5189
34.8429	8.73067	17.0221
35.5337	12.0095	32.2764
22.8956	8.83311	30.7693
27.9239	8.3019	30.9329
29.8984	9.36024	32.6972
21.9314	8.4213	21.7815
20.4221	5.84735	33.1077
19.212	7.71981	29.4817
18.1608	10.7524	30.0356
15.581	9.12619	29.2033
17.4601	10.6011	26.6117
19.9882	8.97965	45.641
24.8491	5.53867	38.6148
24.0811	7.61669	47.5871
19.9707	6.68521	43.2419
42.8467	5.45455	48.2928
33.7771	6.96744	49.715
46.4097	8.0597	52.6317
33.9612	9.40977	58.8105
41.5815	8.75034	18.7476
49.2106	5.48575	22.5385
43.2026	5.3962	25.299
36.2766	12.6554	29.5493
37.4326	8.44912	22.9967
50.9815	6.88127	28.974
35.5873	7.96269	27.8819
41.3927	5.96608	34.3239
36.3373	8.91723	29.9848
27.7464	6.76798	29.4615
40.4173	6.24898	13.3024
60.2154	8.17436	14.8942
24.5491	12.2022	12.2052
27.0074	7.43962	11.9482
25.3466	12.791	13.3931
16.4094	8.00339	15.324
19.4351	9.70081	15.4752
16.6394	11.1377	11.3909
18.7841	8.76119	12.879
16.8544	7.26933	13.2657
23.617	13.4525	12.5378
25.1243	9.27273	9.32706
39.314	9.07327	8.38784
28.2792	8.90298	9.0246
25.8392	10.9152	9.94067
40.383	9.8806	7.57163
31.7098	9.14586	11.8466
23.8468	14.1845	7.93198
47.4408	22.1214	13.6975
33.7932	13.1119	9.78148
37.0843	14.098	10.3734
16.8294	10.8384	6.83647
26.5247	13.5821	8.67149
21.7098	14.7799	13.7301
17.464	9.47979	13.585
19.3072	11.699	11.6459
14.3136	12.7059	12.2746
11.9273	6.72243	10.5133
17.8273	8.92491	11.9782
21.6909	9.93726	14.4899
10.2055	11.3479	13.9592
18.42	10.5219	9.48692
13.78	13.02	9.73385
9.5569	6.16399	11.0038
8.6948	7.36128	8.51385
15.3308	7.61652	10.5338
9.47099	6.51665	10.56
17.5177	6.01356	11.8121
20.2102	8.34155	13.1488
17.8998	5.61899	11.6242
16.0716	6.88409	13.2763
16.1232	8.61282	14.467
12.1957	5.51911	10.8865
8.58535	7.2873	14.6707
9.801	7.63995	12.1581
9.86678	15.361	10.4679
14.9267	8.31552	13.5191
12.2989	9.32996	22.3181
13.6286	8.41588	12.4707
19.831	13.1054	9.91837
28.6033	14.8866	10.2797
27.9461	8.87653	9.29772
37.1101	12.5105	7.78871
21.8893	8.50325	12.0648
18.0705	14.3819	12.7395
24.1628	7.8852	9.87755
42.2984	9.60144	11.7719
44.7584	16.6982	19.5956
24.4861	14.9069	12.9945
21.7453	10.2881	17.9332
16.1597	13.6159	22.1098
17.4327	9.45704	18.1016
11.0151	15.4715	15.3888
12.2635	12.4556	16.5718
9.2761	12.3126	17.8565
13.9239	13.8354	18.3587
11.7598	7.9574	11.5127
14.3308	10.6758	17.8587
10.8277	8.75451	16.5411
13.8648	8.85343	16.135
16.0855	12.509	16.173
13.2138	8.37689	11.4683
16.2572	14.6676	11.6656
12.4359	15.0705	16.9705
10.2527	12.0201	12.7785
11.8597	16.7361	15.2057
9.81923	15.4473	13.0214
14.6209	18.1202	18.4455
11.5707	14.5427	15.9382
9.99879	18.0436	14.2334
7.87001	14.9207	17.4561
13.9135	6.5816	13.939
11.5937	17.4305	32.9455
12.2999	14.3821	31.5329
10.8561	14.5688	24.4704
11.7636	13.7005	19.9955
9.62878	12.2646	31.9955
12.7164	18.9335	30.6125
13.7074	10.8227	30.0841
17.8522	12.8979	30.5034
23.2576	9.22498	36.0703
22.7261	10.9611	28.706
14.8066	6.0094	39.2
19.6719	21.9214	28.454
15.3412	9.48019	31.2162
16.0187	11.6985	21.3351
9.22299	9.38617	36.8768
9.15374	15.5158	22.8324
12.0512	11.7777	28.1049
9.67036	12.4419	27.706
11.6053	19.3532	32.0205
19.0277	19.8025	27.439
15.2687	8.15812	44.7455
14.108	9.31146	35.1964
23.2978	12.7369	42.3214
24.9529	7.69033	45.2247
14.1205	16.1456	46.4777
9.30194	7.06683	49.1949
14.6953	11.0394	49.6533
17.0263	17.0871	54.7619
11.5434	8.67661	32.936
13.746	9.22852	24.3588
8.64616	7.43735	21.6849
6.34949	9.44928	32.9329
13.2807	13.1295	23.6833
6.88061	11.2888	19.9688
14.2388	21.4582	30.3713
8.08321	19.3186	21.6802
10.5803	16.5674	21.259
9.61071	9.79714	25.2602
18.4494	8.83294	27.5376
16.1774	11.1108	30.7796
18.0292	12.4425	20.328
15.5691	13.3919	23.529
18.6239	13.0792	30.0559
14.1781	22.5134	37.1723
23.0235	21.2859	29.165
18.5295	20.7326	43.6511
18.6437	19.4008	52.4321
16.48	14.2996	35.9839
17.2638	16.8285	50.746
15.5813	11.9631	30.8088
13.9464	14.4675	39.673
9.09011	13.1191	56.226
11.4641	14.2312	61.2209
15.212	13.3232	57.774
14.583	12.5703	44.3676
15.2046	13.1493	52.3103
10.1974	10.564	24.8229
13.7562	11.3535	40.211
13.0799	9.60933	30.7517
11.936	10.7253	26.6009
10.53	21.2133	25.0992
17.1918	14.1108	23.4118
15.0248	22.8915	17.3198
13.0671	16.1989	20.5562
13.1679	13.1658	25.1463
13.3237	20.4032	12.5077
15.1303	24.3941	14.53
11.9089	19.3572	19.8199
24.4826	14.6232	28.425
11.814	22.0791	22.8443
17.7303	15.5961	17.6861
13.4684	16.156	22.9278
18.5955	20.63	15.0422
16.3485	18.9299	19.914
9.71611	9.75	25.5895
19.8694	10.0606	28.72
14.8893	13.016	33.8232
16.357	11.3652	46.16
16.8219	12.2132	35.9074
12.6544	13.2453	39.1305
8.16642	12.323	42.9537
7.77761	12.8907	64.5284
9.28498	26.3604	32.4716
6.75331	18.1991	34.2
8.40795	20.2635	29.2632
4.9838	16.54	40.261
7.70692	22.4691	50.6484
6.08395	16.1269	55.4253
7.15832	20.2765	50.2716
13.7685	25.8673	36.3774
10.0935	24.2453	32.9447
12.4837	26.0735	27.1186
9.97935	20.8217	27.6051
12.4261	14.5712	44.341
10.8456	20.1646	22.8881
9.63417	19.4971	35.9919
14.391	22.5778	23.2938
11.3564	18.7365	35.2439
15.522	27.231	29.6469
9.24423	19.3559	33.5451
13.5881	6.66701	59.9385
9.78092	9.33809	40.082
8.85849	5.9888	42.8176
11.1562	12.1782	54.6742
8.30713	8.63035	11.291
10.9539	12.1874	12.6261
7.826	6.5275	11.0608
7.39727	10.113	10.4982
10.7128	7.26171	11.2874
7.89308	9.80652	10.6282
29.3345	6.17108	9.49817
38.796	7.05194	13.8956
25.9816	12.2025	10.3403
35.1238	11.4775	34.8867
32.0067	11.79	21.5762
23.2926	8.6075	53.4141
24.5518	17.9337	30.2598
28.888	16.4138	43.1367
30.7868	7.08	47.0898
27.3044	9.015	49.541
33.092	10.705	52.0371
33.5368	9.245	50.2363
28.1304	6.8675	49.7308
29.0905	16.9187	34.9505
27.0913	13.055	52.8297
29.2048	17.8188	38.2363
32.7653	15.235	39.0787
26.5874	11.4537	36.8846
27.9407	14.1591	43.9835
24.8602	13.9402	42.6245
28.8602	10.7628	33.8077
24.2659	9.02314	40.2363
20.0276	11.6326	33.8755
20.9423	9.64899	38.3993
28.5894	11.9932	23.0897
29.8073	9.75892	38.7949
26.3852	11.4455	41.011
13.668	15.378	33.9305
21.1241	12.6191	26.8574
27.5251	8.84474	45.287
17.3153	9.62777	53.6179
16.6709	20.7526	50.0512
18.8483	21.7541	48.8227
12.3823	24.5961	34.947
19.88	25.0601	39.6033
28.9607	25.3573	58.5594
18.9287	19.4862
22.6567	19.5336
39.5273	16.9628	22.2895
38.62	14.7992	24.3433
23.186	16.9937	20.6567
23.106	12.7294	21.2423
26.824	12.6414	20.3501
25.31	10.0081	23.623
14.6747	11.2821	19.6426
24.0894	8.48019	23.1444
25.9057	11.777	21.2607
25.8324	8.52384	21.5924
19.8045	9.23841	17.9039
21.0649	8.3902	27.8825
20.6718	18.3143	24.3678
11.3373	23.3123	22.2931
24.2744	13.2814	18.6999
26.6879	17.3103	23.4047
23.7479	13.2733	27.7048
24.4134	10.1981	21.4456
23.7605	14.2606	27.3541
28.294	10.0618	26.8559
22.801	10.8811	18.517
24.4381	11.8858	21.9847
18.1528	7.86165	17.7249
32.492	6.34184	14.4012
19.786	10.1632	21.2973
30.6012	7.29349	21.5024
33.9578	14.8079	17.2859
21.9258	12.3882	12.6892
29.9403	11.2357	11.8444
25.6623	17.7294	16.2621
28.0495	22.6451	12.8063
14.23	14.1248	12.9086
22.6346	22.0921	14.5041
20.3188	12.8096	11.2489
21.7365	17.2594	13.2213
21.0131	10.7685	9.30883
29.8719	21.7008	22.5922
50.4522	18.3187	15.9867
21.3788	13.6506	17.7772
16.8392	15.5146	20.0444
14.8636	14.7273	26.4039
18.3741	22.039	22.5628
20.3485	17.7664	21.2956
27.3531	13.5919	17.5475
19.1527	13.2178	15.3245
19.6865	9.66226	16.9975
17.6259	9.76476	15.6785
30.6037	13.9069	17.172
44.7774	11.367	14.4025
15.481	6.68729	19.4555
21.3843	10.5905	15.221
19.4843	13.2423	16.106
13.6645	10.4738	14.4735
13.6372	6.92773	15.821
18.0025	5.63769	13.896
14.6273	11.3165	13.9945
14.1777	10.5531	13.683
14.7273	9.58904	21.0114
15.3744	5.89986	15.9354
22.8831	8.9589	14.0511
13.8251	11.7468	16.1305
13.5662	10.0463	12.4168
16.9362	8.04771	18.2411
12.0222	9.34199	12.5118
17.5614	14.1507	12.8792
10.6058	8.77988	16.4725
21.7294	10.018	12.6655
25.3485	12.9372	12.617
18.8717	11.5168	12.9488
10.8159	9.30657	18.3816
24.7404	11.2518	16.4368
30.4902	7.9452	16.3008
17.9029	10.5026	20.096
21.6403	12.112	24.6472
22.5807	9.50402	26.4824
25.0416	9.83042	19.1472
17.5971	7.66226	19.64
15.4772	6.91072	24.2608
22.0522	7.79452	18.6512
17.2879	7.50968	16.0632
16.0245	13.7973	15.0512
16.7806	20.2126	22.4976
14.9935	13.7596	20.2744
11.5995	12.3831	18.1456
16.1966	22.2669	18.0736
8.26672	12.6226	17.372
16.394	17.8053	26.8768
11.5334	13.6749	21.5688
	11.6819	23.1168
	26.6908	18.1184
10.1256	25.4758	20.372
11.8348	15.0394	12.9978
17.7082	9.73855	14.246
13.087	15.3079	10.3888
10.7884	20.6788	10.8539
15.3208	13.2964	10.3802
11.5369	9.9084	9.71536
15.8276	13.0776	12.6466
10.6566	10.4663	9.65091
11.8093	10.9994	9.30075
8.25968	14.6317	9.22008
9.06263	6.56514	11.7679
11.7755	5.17339	18.5899
10.8543	6.91651	13.3806
9.5292	6.31376	10.9134
12.7678	6.63028	12.3247
10.962	5.27248	12.0427
13.9296	9.78349	15.3181
12.3413	6.6422	13.3776
13.4012	7.1789	10.4823
10.4418	8.25464	10.5093
9.49876	9.17042	19.3626
8.12828	13.5656	13.4726
12.3294	11.4576	9.17078
5.9262	7.56432	14.9988
8.84894	12.1373	18.083
9.22883	15.4423	9.61455
9.61565	8.83355	16.6248
19.8927	12.3402	10.6807
17.12	12.1804	12.1557
12.0787	8.41313	17.279
9.16533	8.5504	22.1882
9.716	12.1068	14.7011
10.0207	13.057	14.5274
11.4416	7.58621	13.7891
10.8994	10.5504	14.0996
12.4169	5.48077	15.5513
13.6982	13.9675	9.88218
13.6675	12.6784	17.544
23.0193	13.9039	28.9215
13.9608	17.1247	20.9891
19.9747	10.8156	12.3476
7.85946	6.78382	12.4422
6.17613	8.10544	15.4124
9.98604	7.48409	16.9033
8.82928	8.88793	17.7139
8.41622	8.68501	15.2513
4.81982	7.10809	21.897
9.11261	7.59682	15.647
9.71216	12.5749	18.6608
10.9955	13.7658	20.4377
6.22568	12.0377	14.8944
12.1565	9.55042	19.7612
8.18606	12.4528	21.853
10.9559	11.0468	15.9305
11.8777	16.9902	18.8051
9.40039	6.98048	19.9206
10.9106	10.9968	25.1378
9.02433	8.56409	21.4245
13.1446	11.1496	13.0477
14.1644	8.14834	11.184
9.15976	12.5947	12.5493
9.55818	7.8458	12.1719
8.93425	6.99479	14.3348
8.09993	9.67339	9.10312
13.342	11.0534	11.2005
9.47336	9.39753	13.1025
9.95043	20.5224	10.8841
11.9033	8.56994	8.88044
11.3333	9.12752	9.16682
10.3792	10.9519	10.4713
10.9604	7.27261	8.4671
10.1735	10.6519	12.412
7.72615	7.40468	9.84245
6.114	8.30059	10.9504
7.37794	10.8822	13.2155
6.69021	8.40859	8.52224
9.83798	15.2446	12.8564
8.37595	12.2297	11.2711
9.28481	7.6812	9.20806
9.0076	10.9401	13.5319
7.88608	9.67859	19.0761
7.82658	11.7482	14.8732
8.26709	17.3656	12.9599
8.71646	12.8764	13.8691
7.12658	11.6174	14.6285
7.68228	16.5452	12.5998
8.04051	22.1885	14.5442
8.73038	25.9393	22.6674
9.32152	22.1916	18.6302
7.27848	19.8419	24.7746
7.68101	18.4419	27.5175
8.02279	20.2215	23.0416
7.61519	25.0487	25.3085
7.57595	17.8571	23.9967
20.0145	16.112	31.3479
19.3178	25.2613	29.6193
19.2298	19.8393	25.5591
19.3091	24.5063	26.2396
16.696	26.3084	29.128
12.848	11.1	22.9026
19.8778	10.3131	10.8533
13.8429	11.9906	14.4326
8.29896	13.5393	21.463
9.31211	11.3602	35.0533
15.3571	12.4969	14.0919
16.7142	10.2455	25.2674
14.2872	11.5005	15.2785
12.89	16.3711	25.2452
18.3523	23.2141	16.6244
16.1398	14.3418	13.3296
16.5424	14.2561	10.4482
13.0289	14.6622	14.9437
17.4314	21.1221	17.7222
20.5323	12.1618	12.777
20.2382	23.9405	14.1474
21.3715	16.0664	11.1082
21.7167	16.8439	19.1133
20.8506	18.8323	18.077
18.9421	6.55161	16.337
22.4307	15.6394	14.8022
20.7701	18.1607	20.3364
29.9312	20.5613	17.7561
17.5613	11.9277	18.2917
28.8371	21.5039	13.0939
17.8865	13.8961	14.2204
23.5051	12.3226	15.4182
18.1129	6.44258	17.7061
21.7689	11.369	11.825
20.6995	8.66549	22.7295
29.1871	8.51237	15.6659
26.0278	9.33746	18.1727
20.9903	7.21084	16.9212
24.1889	11.3751	20.3727
19.2075	10.0671	20.4856
16.6754	5.51885	20.7727
14.9087	6.14546	20.8714
12.1487	10.1472	14.502
13.07	6.49705	20.456
11.0746	12.9099	13.7903
30.6272	6.85807	12.9608
24.9526	13.2981	16.1651
24.8065	15.3778	14.0893
31.8539	14.2112	11.475
24.3769	8.07483	18.0539
33.525	10.6632	15.5487
24.7537	8.54436	11.5183
22.4817	7.65842	31.8887
30.0068	8.97646	11.8704
40.429	8.98914	17.327
27.703	12.2879	13.2504
28.1028	17.3645	20.7174
27.3444	8.18165	15.9261
29.1067	9.38141	15.9148
34.8517	9.55763	18.0217
30.2705	10.3718	21.7426
27.5866	15.7737	21.9635
23.0094	10.2311	20.0635
26.845	8.21474	24.4444
26.6302	13.8609	15.1774
23.6919	11.892	5.5741
20.4195	8.51334	5.77978
27.2094	9.96823	6.34349
30.4013	7.25095	5.74031
30.9557	9.57052	8.48061
33.1409	8.22872	6.41274
31.5081	9.05146	7.49515
27.7863	9.6061	8.18767
34.4895	13.7973	7.05609
28.2642	8.32846	7.38227
28.2666	21.0252	8.09349
34.3978	18.2281	16.7385
29.1447	28.9395	15.2782
18.3617	9.82609	17.704
30.6682	11.2785	16.6265
19.0836	7.04915	18.0006
25.2171	19.1103	17.1385
20.2666	13.8475	15.7477
31.5394	9.19912	20.3705
22.0825	16.4694	16.0591
27.6887	8.38941	8.72533
19.6793	17.8557	9.49067
24.5027	25.4959	9.656
34.1218	26.988	9.64533
24.4225	12.3926	10.688
29.8446	35.8576	11.2213
20.9092	14.8626	11.2693
21.6058	10.8615	21.1231
22.2553	13.2585	20.661
24.2161	14.0917	18.4727
49.6511	13.1307	18.9552
35.1542	12.9298	23.4444
47.3356	14.2771	24.1165
38.1491	15.6839	19.8124
33.4529	15.0663	25.5694
36.2236	14.4663	21.0948
34.3657	14.3863	25.4286
38.5679	13.7171	22.4055
29.8338	13.9678	21.5787
37.6342	10.2751	14.9263
32.0587	9.09756	17.9993
35.6487	6.5922	22.4628
32.9665	8.54049	20.3285
38.0301	7.12585	26.4779
25.5413	7.89073	19.4009
33.1792	6.66537	24.3897
27.1676	10.6963	16.0033
22.1802	5.29374	23.9322
18.8249	17.8449	20.0902
27.5707	5.63136	17.1929
24.3943	4.51024	19.6695
27.2539	16.5933	17.2693
15.6066	12.4365	13.4444
30.4123	5.59567	16.1185
24.476	6.03101	18.9734
31.3104	11.2411	11.2557
35.5729	8.24225	11.7502
31.8493	12.7484	9.35772
24.9713	13.1147	13.3843
22.2032	13.529	18.3747
26.5419	11.392	12.5543
42.1868	13.5424	13.6186
55.5251	5.58338	14.5906
72.457	6.73435	15.5931
48.1293	11.0462	14.5371
33.029	11.8701	16.0873
45.4617	14.6916	6.83443
26.3635	13.9912	14.5709
33.8495	13.7519	14.7778
20.438	15.8403	15.7087
26.517	11.3079	16.2726
31.089	19.7009	22.4754
31.7905	17.6374	13.8933
27.9955	17.9102	14.1413
38.848	9.23903	16.9765
41.7415	22.0959	12.2318
29.4978	9.41661	16.2446
33.4877	12.944	16.4987
20.0327	10.0122	11.6
18.2256	14.9703	10.2987
30.013	16.4929	10.9512
27.3223	20.1533	10.3172
37.923	14.4394	11.6881
28.0818	15.6667	13.5082
23.7691	12.4422	12.7135
23.5055	14.7769	13.4987
24.7571	16.5325	17.5204
7.92345	7.02601	18.4659
22.2241	14.5647	15.8677
18.0004	14.0308	17.7811
17.0758	8.20592	15.1868
24.4371	8.14669	18.8142
19.1439	6.94284	17.9338
23.3927	10.1198	16.6974
14.2078	10.3822	19.1974
19.8761	6.57231	17.0118
24.8828	6.96074	16.169
24.6805	7.11295	15.5934
16.6379	8.73209	17.1383
43.3702	11.5434	12.0289
30.8621	6.46419	12.8558
21.8705	7.15151	14.7779
22.2715	8.15083	11.6779
30.4272	8.02479	12.6385
24.4862	7.95248	11.2211
20.8501	11.0903	12.0808
38.7591	9.621
39.2448	11.8265
40.5326	9.89693
37.9382	12.2023
35.1126	9.50512
35.2884	11.8912
24.0908	16.0928
20.0098	5.52881
23.4656	9.70422
18.5745	9.37004
26.2287	10.4008
19.9462	7.93534
17.9945	11.388
25.5564	6.72087
23.1748	6.79001
32.4475	8.76761
34.9704	7.2612
33.4807	17.2273
28.3504	13.2663
29.2586	7.11268
31.1683	6.30154
31.8471	11.5115
31.6887	7.62292
34.3332	9.8822
27.9089	15.3828
27.9559	13.4053
24.6492	14.1216
22.2388	12.8963
18.5669	8.06466
28.7	12.3156
39.8424	11.701
19.807	11.8444
25.7061	12.5106
34.7736	7.37469
40.2473	10.5589
37.0438	6.88027
28.924	19.8002
28.5783	9.91625
23.3922	6.3598
37.3734	24.4653
34.164	13.6911
45.2735	7.54777
29.7194	16.4156
33.7082	11.92
37.7664	7.38648
23.6455	8.25186
26.6745	12.9162
23.3834	9.14764
21.2384	8.48201
25.2923	7.70968
24.8697	14.6762
27.5165	10.6352
37.3657	14.9051
30.0664	9.35856
35.8974	11.683
26.3155	12.1303
25.9076	17.7891
34.5683	8.27577
25.4689	8.13654
33.5604	17.8354
25.9102	10.1576
32.5895	3.6735
39.0395	9.23314
40.4233	4.90178
32.145	12.2234
28.4563	13.3767
25.7918	8.27307
24.1214	15.9924
32.7765	8.76686
30.0074	15.8716
27.0133	9.07933
35.5088	15.4879
32.8374	11.5062
30.6179	4.60971
30.9743	5.94556
40.9851	5.24204
32.2758	4.38359
39.0156	5.93719
35.6673	5.83585
18.5141	9.1608
24.8277	3.66918
18.3941	5.91774
36.5414	5.65811
23.6346	5.48658
24.8696	10.9154
19.8314	6.6196
17.6723	6.31505
39.0823	5.72229
32.5296	6.29988
27.7727	6.48483
37.0504	6.47608
23.6314	4.36348
30.105	8.09802
26.6664	6.81797
37.9168	6.02275
28.4473	5.22287
26.3009	13.2248
27.6682	9.92052
30.6932	7.84951
36.1136	6.1798
42.9522	10.4691
25.8223	10.2547
39.0426	7.98567
21.3528	4.70554
19.3081	5.22606
20.225	7.72508
43.9127	9.90749
29.5368	7.09446
42.2518	3.29642
32.6456	9.35896
18.1814	6.33094
24.959	12.5655
22.0189	4.9772
26.0846	5.61498
24.1441	10.0098
	8.42997
	9.04821
13.3329	5.69642
23.4504	5.77785
15.8321	6.08925
15.8839	7.14658
13.9923	8.48534
14.1993	7.81498
11.598	5.39739
10.0803	7.88013
11.1921	6.71335
12.8994	3.643
35.0688	5.00456
36.0932	5.9342
33.0337	10.0476
34.9197	6.57003
32.6473	8.20065
27.6516	3.56026
44.4473	3.60782
40.8566	10.1733
33.6007	11.2209
21.7216	4.48274
34.4469	7.31792
24.8726	4.18176
20.8465	7.14006
23.3319	6.76743
21.0808	9.10578
23.9447	12.5873
22.6209	9.827
20.8073	10.7058
20.7147	10.2391
24.5289	9.47438
19.5405	10.3422
24.6051	10.2584
17.6525	12.7333
29.3825	11.2556
29.4677	11.9295
22.9155	11.8386
30.4327	10.9565
26.288	7.13003
26.149	10.6667
19.0268	6.39394
20.5084	14.4964
21.3279	7.17245
25.6868	9.93444
24.2838	10.6887
20.4891	7.01928
18.4122	11.6733
21.1788	7.61984
20.2157	4.96804
22.0066	8.82259
21.5759	8.59174
19.2978	10.092
19.6811	7.30413
19.524	9.75372
16.9126	7.427
18.405	6.93829
26.3539	10.427
24.2535	10.7179
24.8442	7.10121
21.2043	7.9577
27.59	10.3505
24.3975	7.70393
28.0422	8.86858
20.5914	7.79607
23.3989	7.40785
27.2922	8.48515
25.8012	7.34936
22.3566	6.07072
20.6039	13.174
25.2216	5.35502
31.3241	11.5233
25.6676	4.77369
26.241	5.13296
27.9418	8.81754
24.4961	5.15417
28.7431	5.08769
32.5327	14.3354
26.2797	13.2339
26.4922	9.59846
26.3909	15.0785
30.3307	23.7154
26.6248	7.09077
29.7843	23.4369
26.0837	37.3062
22.0428	9.69538
16.4209	25.6554
25.6317	20.0877
20.7592	14.5185
23.7855	18.1287
31.0819	13.4025
28.3445	16.8255
47.352	10.8519
36.1248	19.2856
33.6071	9.32944
36.1462	32.6111
38.5922	32.0049
13.974	18.2047
10.3061	22.0234
12.6316	12.2651
11.6766	9.97174
10.7313	18.962
13.6403	15.8986
11.3505	17.923
8.04894	22.0214
9.41238	22.4912
7.62236	20.5877
8.61099	20.5253
9.57625	20.5546
6.99179	12.577
7.90622	28.0897
4.8557	10.8504
7.68582	10.5258
5.31828	16.3913
9.09283	7.78145
8.62741	13.2458
4.96179	12.7913
7.59362	11.0632
6.40259	11.0783
10.1724	12.1565
8.288	12.0388
7.338	13.2162
8.7548	14.2632
8.9048	22.0041
8.0284	12.0603
9.8184	24.091
13.0636	20.0586
9.1852	13.6626
10.0408	12.2783
9.1724	18.9398
8.3868	14.741
9.6552	16.9223
16.2186	14.5217
17.0983	15.2061
19.7684	21.8837
15.608	12.4281
27.4217	13.6004
27.0168	11.3282
13.1009	11.3023
15.6882	9.2182
24.8228	10.9107
18.2419	9.33861
7.17451	5.28717
9.93416	8.53307
4.97699	17.7304
10.4913	6.25438
10.3706	12.1854
10.4198	14.2267
7.83858	17.0339
7.64814	9.00848
7.28354	8.65517
7.76106	26.5998
15.9254	11.6235
20.4122	13.8423
16.5084	7.21062
15.5887	8.25895
21.2468	12.1677
17.0536	16.2333
12.8187	8.53938
15.6437	12.6271
18.2984	14.5907
17.0899	13.0161
18.2764	16.707
12.9699	5.26611
14.6155	12.1891
14.4065	5.91527
6.69994	19.2297
7.32143	8.25716
9.31468	8.0716
8.01209	15.031
6.92576	11.3562
8.68729	6.30847
8.48791
7.26772
7.0689	9.09775
13.145	9.6809
12.8793	8.83708
12.8936	9.3809
7.97353	8.38652
16.1413	9.63483
13.3182	9.29551
13.1218	9.25618
12.9725	8.24494
15.1244	9.8191
21.5103	10.2533
14.46	10.2962
14.1673	9.30571
13.9182	14.8771
14.1423	8.42
12.8073	10.6438
13.7532	9.66191
13.3814	8.04
14.9695	8.25453
20.2839	7.60326
16.3399	8.25815
19.641	7.20109
34.1184	7.87772
18.4825	8.54982
18.9223	8.37862
24.8078	6.80706
17.2126	7.82337
18.1935	8.97373
7.582	5.63225
10.0223	8.66214
7.16514	12.4732
7.66657	8.16914
7.994	8.9162
8.94971	8.88605
7.86771	7.91211
6.70914	8.60296
22.4649	9.66582
21.6317	10.2657
26.234	9.41645
22.3191	8.30982
20.4961	8.84033
31.7565	9.81783
24.3125	8.53137
19.9748	6.67893
26.8074	9.28386
23.4931	7.21549
21.7025	9.34444
9.83	7.84595
23.9817	8.39074
8.075	7.45565
17.3117	17.5064
11.7033	15.072
7.73667	16.417
12.53	16.3542
9.17167	18.827
10.0224	18.993
9.89969	13.3389
10.5047	12.8696
10.4388	14.7565
13.9143	10.8751
10.8068	9.39114
10.3776	9.24723
11.2065	13.9619
10.2745	11.083
10.6758	10.5818
10.0848	11.9563
7.98913	10.6992
14.3615	9.14101
11.4245	8.73583
14.1227	8.5087
13.0955	10.1669
11.422	9.23338
12.6797	10.1352
11.2923	9.54172
10.6435	11.2137
9.05146	9.41455
10.9032	11.9839
13.5834	9.1477
21.3535	9.54931
9.80664	10.5859
10.0342	11.9704
10.772	7.67954
12.216	8.66639
12.215	10.5193
43.5838	11.2983
40.0744	6.96338
54.78	7.85
39.956	7.49085
42.7276	8.64014
52.4365	8.99366
15.8537	10.4172
14.2444	9.61803
11.6476	8.15663
22.9157	7.05444
10.2319	7.88933
13.9051	7.44623
11.4269	7.71397
37.025	8.81169
48.125	10.3289
19.1914	7.29987
25.2483	8.36504
43.2233	8.97995
32.6086	11.4788
44.4491	8.91469
36.5491	8.13893
30.4578	15.7018
54.1957	16.6631
44.1155	13.3514
30.3681	14.3088
21.1405	11.2915
34.15	13.3627
26.6552	13.7771
22.4601	12.2403
41.4931	14.1393
20.3684	13.096
24.7544	11.7731
20.1135	11.4711
20.4364	12.8254
19.5829	13.0534
	9.88662
	10.1806
	9.50956
	8.41463
	7.08899
	10.2195
	8.85827
	17.9012
	19.1724
	19.513
	11.1204
	19.6439
	12.3007
	13.2175
	11.0078
	12.7799
	14.9861
	12.1404
	14.8085
	10.5797
	9.60312
	15.1282
	14.4393
	16.1906
	19.0035
	13.6954
	10.1789
	10.8035
	10.607
	8.86954
	9.65176
	12.0964
	12.1514
	16.2982
	11.667
	10.1289
	8.23337
	7.4154
	9.04084
	8.05017
	8.63477
	6.3944
	6.62544
	9.37923
	8.10385
	11.7141
	8.72695
	9.05134
	8.70478
	10.4647
	9.10419
	7.12216
	9.15569
	9.07545
	7.80479
	7.34132
	8.75964
	11.9242
	11.9473
	13.018
	12.964
	14.6799
	13.5039
	13.9987
	9.18958
	8.30878
	9.13984
	8.76678
	7.63679
	8.42234
	11.0108
	8.42421
	5.51197
	9.26983
	8.46598
	8.69592
	9.10605
	9.57344
	7.76588
	8.18135
	6.86475
	7.67572
	5.47848
	6.33402
	6.51998
	7.60195
	10.0092
	9.4001
	10.8648
	9.6409
	9.03725
	8.71188
	7.90653
	8.19255
	7.14055
	8.15812
	7.94378
	8.02951
	8.13212
	7.60014
	8.17287
	11.2572
	10.969
	9.45121
	12.2348
	12.4173
	11.411
	10.93
	12.1986
	12.2684
	11.4089
	14.8736
	11.2929
	14.3338
	14.9547
	13.1955
	15.4498
	4.72395
	3.92139
	5.89762
	4.9287
	6.09324
	5.57221
	5.51188
	5.16819
	5.18464
	10.9377
	12.4446
	12.1315
	13.1574
	10.1955
	15.8374
	12.436
	12.1393
	10.9731
	9.52239
	9.46468
	12.2458
	12.8706
	9.12836
	7.84378
	10.1274
	8.59104
	8.13234
	8.40896
	12.8955
	12.4852
	11.5647
	12.0328
	10.3401
	12.9938
	10.4087
	11.5725
	11.6115
	11.3869
	9.65991
	11.0671
	8.36818
	6.11111
	7.11488
	7.66667
	7.47928
	5.77966
	5.91996
	6.21751
	9.13793
	8.95965
	6.74688
	9.48276
	9.83052
	8.82025
	6.87748
	5.81724
	7.70644
	10.3703
	9.52178
	8.66951
	11.4848
	5.63258
	5.17996
	4.85063
	5.13377
	4.72885
	5.34253
	5.41152
	6.18116
	4.56089
	5.25675
	4.71266
	10.2416
	10.8573
	11.7173
	9.03918
	7.75187
	8.98041
	8.20149
	7.15842
	6.16337
	7.69719
	7.85396
	12.0123
	11.1923
	13.2851
	9.51192
	11.7412
	13.5883
	11.6524
	9.48891
	7.36154
	7.4585
	7.21117
	9.51192
	8.23898
	11.4207
	7.58933
	7.6249
	8.87548
	8.78113
	5.79737
	8.46558
	6.63573
	6.27146
	5.79428
	8.01469
	8.26829
	9.7184
	7.5898
	6.90909
	7.33259
	5.76275
	5.87361
	14.0302
	15.2839
	11.9623
	12.1457
	12.6935
	14.7864
	17.0729
	17.6658
	13.8618
	13.3166
	12.2965
	14.1533
	13.7085
	14.1482
	4.24634
	5.62716
	4.68575
	5.32756
	5.8775
	6.85752
	5.18242
	10.2269
	11.1253
	10.4117
	15.0616
	10.7803
	10.5031
	11.0082
	10.1448
	6.11992
	7.97185
	9.1439
	8.22211
	9.63399
	8.75078
	9.76236
	8.98669
	11.038
	9.92395
	11.962
	10.1806
	13.2338
	11.097
	14.1981
	12.139
	14.1645
	10.7524
	10.9824
	9.81789
	8.14537
	10.6709
	8.66773
	11.4936
	6.85294
	9.63761
	4.90231
	5.16597
	6.20693
	6.18802
	5.29622
	7.09139
	11.4141
	7.42969
	9.1263
	11.7643
	10.6432
	10.0534
	9.36859
	10.7602
	9.88377
	8.69738
	9.77068
	8.8911
	7.39162
	6.511
	8.46073
	8.31204
	8.33655
	6.69478
	8.0755
	9.09237
	8.92771
	8.4257
	7.46904
	7.14728
	7.91088
	4.99062
	8.02158
	6.29929
	4.5488
	4.13898
	6.17259
	4.90562
	6.27214
	6.61926
	7.44732
	5.27229
	6.64013
	6.12102
	6.67675
	7.54299
	8.05733
	11.7133
	12.684
	12.7156
	10.9661
	10.5711
	7.5079
	9.26185
	11.3499
	8.28442
	10.2754
	9.00677
	9.76975
	7.57788
	6.12641
	8.88598
	11.4841
	9.28598
	7.78692
	10.2149
	8.41869
	8.46729
	8.91402
	8.98505
	11.8411
	11.8112
	8.89394
	7.94372
	5.8052
	5.90693
	6.86364
	7.17532
	8.04978
	8.88312
	8.57576
	8.55657
	10.3628
	9.77373
	9.47984
	9.25618
	9.80624
	8.02861
	7.07932
	5.92718
	5.89543
	6.36993
	8.47712
	6.7085
	7.64575
	8.69935
	6.66405
	8.10588
	8.80491
	8.89768
	9.65757
	11.3029
	10.4106
	7.025
	5.8925
	7.23167
	9.44333
	8.38833
	8.88417
	10.5223
	10.4521
	10.2428
	8.14254
	11.3641
	9.86971
	11.0312
	9.46625
	9.03531
	8.92316
	9.82451
	12.3551
	9.64382
	32.1526
	22.9373
	26.0736
	23.2752
	21.5175
	19.4552
	13.5856
	15.3113
	11.4377
	23.8755
	13.4805
	15.0759
	8.92023
	13.5876
	12.393
	9.6965
	9.98054
	14.7733
	13.2035
	10.7166
	12.7238
	11.5044
	16.8619
	9.76454
	18.7369
	12.3692
	14.4637
	7.37159
	9.63688
	8.98965
	7.68109
	9.64628
	9.73189
	9.66228
	11.1944
	12.3973
	10.593
	12.9405
	10.407
	9.38396
	9.97448
	8.54556
	10.0389
	12.1956
	8.71567
	10.2467
	9.18104
	9.7254
	9.76428
	9.65371
	8.875
	8.9391
	8.61458
	8.74199
	8.28766
	8.76202
	6.44544
	8.12983
	6.86326
	8.36879
	5.8826
	6.53522
	6.69544
	6.1761
	7.0884
	5.89296
	6.41782
	6.41713
	6.54558
	7.74309
	7.04489
	5.2424
	6.01243
	6.4489
	6.0221
	4.67366
	6.17457
	6.23335
	5.25195
	6.08578
	7.26335
	4.43851
	7.08398
	6.33413
	5.40792
	5.78344
	6.35453
	7.79664
	4.86863
	5.9802
	5.82303
	5.32573
	6.27654
	8.18476
	6.87942
	7.60348
	5.14037
	8.74505
	4.21296
	6.90042
	5.67906
	6.12058
	8.59056
	8.32017
	9.61116
	7.79056
	8.63605
	6.71502
	7.68498
	10.3347
	9.73525
	11.1756
	10.7037
	11.9067
	15.3073
	11.8285
	13.0425
	10.0483
	9.63207
	12.2271
	8.06886
	7.97122
	8.62796
	7.48715
	6.26002
	7.49846
	7.03494
	7.81912
	6.41007
	8.31136
	9.59253
	11.8253
	11.6688
	15.6299
	10.1358
	11.2629
	7.66561
	9.91183
	7.73392
	5.71724
	7.11914
	8.42415
	9.55961
	8.70884
	7.6691
	8.24817
	10.9221
	8.15004
	7.84104
	8.75831
	11.4706
	13.0267
	12.6586
	13.0018
	17.705
	9.44028
	12.7513
	13.7959
	10.6034
	10.4572
	13.9536
	5.21301
	5.20894
	5.55528
	4.69268
	4.89756
	4.61463
	5.59593
	4.60407
	5.35122
	14.6593
	9.96405
	14.9681
	12.3954
	12.9036
	11.2361
	6.87691
	10.573
	11.7487
	10.6095
	10.7275
	8.47793
	12.0306
	8.00246
	8.00295
	9.24385
	9.58751
	7.93756
	8.1352
	9.38201
	7.56941
	9.94657
	8.06076
	8.94814
	6.54269
	7.68937
	7.46255
	7.49497
	8.81767
	7.05313
	7.79642
	8.08557
	8.12081
	8.21029
	5.14653
	6.49441
	7.29027
	6.533
	6.27908
	7.14038
	5.26678
	8.13442
	8.30965
	8.01056
	8.41191
	8.17139
	8.64352
	6.59197
	9.15844
	7.40315
	9.6267
	10.1677
	10.1843
	10.7852
	12.362
	10.6848
	13.8452
	12.4526
	11.7634
	8.97998
	8.54478
	5.07165
	6.1686
	4.54373
	4.92518
	8.08746
	6.52055
	6.6301
	6.22704
	6.93537
	6.60714
	5.875
	8.52041
	7.53316
	8.17002
	6.1558
	5.1728
	6.12526
	5.42019
	5.68772
	5.86711
	6.0805
	5.62144
	6.24323
	3.87168
	5.85151
	4.77543
	6.04216
	6.98625
	4.92392
	5.21265
	6.16315
	5.67461
	6.66636
	6.85694
	8.78754
	11.0368
	9.66761
	8.29839
	9.13173
	6.28754
	9.88857
	6.42587
	7.88716
	7.94665
	6.99858
	7.74693
	7.2644
	4.90604
	7.75307
	5.54721
	4.25322
	4.34764
	5.78884
	4.77339
	4.66438
	4.23391
	4.80386
	4.68455
	8.00129
	5.47854
	4.98154
	6.09227
	5.31116
	4.42103
	5.89871
	15.0123
	13.0823
	14.5412
	13.6007
	16.7828
	17.8564
	7.98131
	7.92236
	12.3307
	7.88641
	9.37527
	19.0597
	15.3436
	12.6226
	12.363
	5.30508
	6.22689
	5.22872
	6.52174
	7.57472
	5.66642
	4.77238
	5.2521
	8.59043
	5.47424
	8.64267
	5.2521
	6.49689
	6.43332
	6.75375
	11.7651
	6.5327
	5.56485
	10.9569
	7.15564
	10.7084
	4.6182
	4.91633
	4.82061
	14.2021
	13.7985
	11.3475
	11.7541
	13.4557
	11.8073
	11.2955
	14.5036
	10.8712
	9.34043
	10.3115
	13.0053
	13.2869
	11.6501
	13.9365
	9.86347
	11.3269
	12.3979
	11.9419
	9.4816
	10.5438
	10.2695
	9.91482
	9.15753
	8.76429
	13.6206
	10.9848
	12.9417
	12.8995
	12.4744
	11.5982
