# Supplementary material for: Distinct pathways drive anterior hypoblast specification in the implanting human embryo
Source: Nat Cell Biol. 2024 Mar 5;26(3):353–65. doi: 10.1038/s41556-024-01367-1 (PMC10940163; doi:10.1038/s41556-024-01367-1)
Supplement: Supplementary file 8 — Statistical source data. [file 41556_2024_1367_MOESM8_ESM.xlsx]

## Sheet: Fig. 5b
Fig. 5b	Day 5-7 Epiblast
Control	LDN	BMP6
16	3	0
10	6	28
32	3	21
13	0	13
13	7	9
57	22	49
28	4	18
29	29	25
7
27
16
16
20
14
4
3
12
9
56
31
27
9
32
40
10
27
17
54
19
11
6
4
4
13
14
44
1
31
30
14
52
19
0
33

## Sheet: Fig. 5c
Fig. 5c	Day 5-7 Hypoblast
Control	LDN	BMP6
		1
22	23	42
35	13	3
17	0	11
21	17	30
22	40	27
22	40	26
2	32	33
32
27
34
2
61
33
19
12
32
16
42
52
64
13
88
32
38
84
42
41
28
9
16
11
36
35
14
28
5
58
70
23
61
24
19
92

## Sheet: Fig. 5d
Fig. 5d	Day 5-7 CER1
Control	LDN	BMP6
0	0	0
0	4	5
11	5	1
6		0
8	0	0
0	3	4
0	1	0
13	0	2
3
5
2
7
6
5
0
0
1
0
8
3
0
1
2
4
4
0
3
2
6
3
1
1
2
2
2
4
0
2
3
1
4
2
0
10

## Sheet: Fig. 5f
Fig. 5f	Day 7-9 Epiblast
Control	LDN	BMP6
6	17	5
15	10	3
5	0	5
3	1	3
20	4	0
9	23	3
14
0
32
8
0
1
1
11
3
12
13
0
0
8
4
7
36
28
35
39
4
89
44
10
7
27
0
47
9
32
34
4
11

## Sheet: Fig. 5g
Fig. 5g	Day 7-9 Hypoblast
Control	LDN	BMP6
0	34	23
64	0	14
27		12
15	4	6
	12	0
17	36	6
5
2
0
51
12
18
25
22
10
1
6
11
9
13
69
22
65
69
30
47
81
19
32
11
0
40
25
70
112
23
45

## Sheet: Fig. 5h
Fig. 5h	Day 7-9 CER1
Control	LDN	BMP6
	0	2
0		1
0		0
0	0	0
0	0
14	0	0
2
0
3
0
0
2
1
2
0
0
7
6
15
6
7
8
4
4
10
3
5
2
3
0
3
2
2
2

## Sheet: Fig. 5k
Fig. 5k	pSMAD1.5.9 levels in ESCs
human ESC			mESC
PXGL	mTeSR		2iLif	N2B27
235.021	86.4925		114.675	97.9008
267.471	104.537		127.452	106.998
271.161	106.58		128.35	94.3882
189.464	89.97		108.478	88.4723
326.239	94.3664		125.234	84.7731
320.589	93.4985		151.268	91.8471
328.754	88.958		117.49	92.679
249.021	103.219		126.223	91.1445
345.7	82.4054		110.949	77.0924
310.507	103.943		118.102	107.239
283.45	101.327		119.96	97.405
305.307	93.5976		116.433	121.037
300.061	102.216		110.817	97.2353
294.229	106.571		113.144	108.602
373.439	88.1562		115.206	96.1983
322.871	107.198		136.344	108.319
307.536	102.499		119.958	114.43
236.118	101.598		102.124	93.7731
299.986	108.745		126.129	37.4605
292.743	94.2853		133.228	80.9076
300.843	98.8739		118.945	112.892
64.5857	107.79		105.86	107.955
106.621	105.132		118.984	104.205
194.232	101.625		113.767	73.763
221.871	89.6727		98.1885	102.308
289.521	100.904		104.805	105.313
299.279	107.228		85.5588	97.2908
447.289	90.4475		111.641	98.6992
276.757	100.874		115.767	122.618
102.154	78.7267		111.206	89.2269
278.321	102.435		115.461	64.9748
252.85	104.58		117.989	105.585
359.739	99.1652		108.754	102.958
138.961	105.913		95.8337	118.511
306.168	93.4444		102.632	92.0134
280.293	94.5676		116.732	28.6118
307.546	76.6907		124.415	149.067
253.475	112.97		114.126	164.187
213.121	105.366		106.284	60.0181
166.636	90.5135		111.282	155.19
259.386	101.333		102.31	195.892
271.193	103.478		129.443	158.508
221.768	100.201		118.353	58.2777
316.279	121.847		124.401	128.625
304.743	80.3664		105.142	146.323
320.8	96.8859		85.9978	129.883
265.104	98.0721		96.7494	114.887
172.121	100.805		133.741	127.117
280.746	116.015		115.075	116.494
289.429	99.8919		106.228	150.339
266.657	110.58		106.867	138.23
300.729	94.2733		142.632	215.998
198.125	103.426		137.368	139.869
224.279	103.586		133.534	135.849
172.771	105.553		114.605	122.242
236.961	94.6547		115.155	139.693
264.657	110.375		126.051	131.765
274.882	94.0781		103.714	107.433
264.6	97.3033		126.61	132.971
279.611	97.003		121.242	129.079
245.939	106.835		126.406	109.135
348.271	98.2342		119.876	141.027
300.814	78.2553		128.075	145.178
86.275	92.7868		138.126	143.327
276.482	103.027		113.395	119.142
391.179	88.0661		127.909	53.4763
295.443	84.6457		136.508	117.196
280.857	89.0511		103.239	135.702
313.007	97.9129		118.993	121.465
289.454	99.0901		120.244	170.729
356.314	100.556		116.188	124.953
180.557	118.793		111.652	156.056
343.95	110.201		118.479	42.3973
243.814	120.393		114.31	26.3296
327.036	105.706		108.022	141.284
150.943	107.706		116.641	135.578
288.679	109.823		115.106	126.727
100.425	88.024		128.922	99.7314
164.082	77.2072		119.652	135.147
208.357	105.766		109.803	133.081
380.171	113.249		124.947	69.526
97	114.985		105.765	105.005
296.754	97.1171		112.386	151.786
268.054	106.691		127.448	115.79
260.757	88.006		123.816	114.813
350.75	106.61		118.055	78.3544
276.861	108.507		114.925	131.102
285.439	111.279		99.4906	86.8781
202.443	92.4595		111.231	82.1896
75.0071	130.12		117.629	109.152
243.171	97.9189		115.205	96.2403
208.496	84.3003		113.916	126.439
128.725	100.201		103.474	78.3247
57.825	115.084		97.2453	105.476
82.5143	106.718		104.524	118.589
362.637	103.243		109.241	126.944
343.859	103.363		114.952	115.619
315.769	106.736		130.704	125.864
376.376	81.036		108.34	80.0606
135.786	110.625		116.191	98.6753
330.991	102.991		99.2243	106.11
329.06	104.396		109.04	105.364
326.483	107.691		117.197	104.626
339.996	88.6276		111.216	124.509
313.107	97.9459		115.354	81.6017
364.598	106.457		118.413	94.8831
337.5	84.7838		118.132	95.7316
387.795	99.8649		104.208	105.688
367.141	101.811		113.463	128.452
354.013	100.727		110.386	82.6082
346.038	107.85		105.057	108.887
293.342	95.9519		89.8931	95.6775
321.786	88.8889		113.061	122.797
327.329	113.108		102.486	85.9134
397.833	94.9549		113.168	99.8961
299.03	96.7718		111.937	113.968
325.239	109.646		106.157	101.602
347.342	123.354		93.2662	118.463
269.59	105.351		98.87	131.056
355.825	99.5075		98.7296	114.788
309.996	98.9519		92.2746	108.602
301.996	108.985		92.6478	118.794
335.209	112.219		111.275	104.21
259.667	99.982		114.415	104.108
349.325	97.0751		92.8071	126.937
547.5	130.808		95.7212	118.63
312.145	116.634		102.281	117.545
350.842	88.994		109.952	117.896
316.594	108.556		84.7109	108.03
153.487	111.802		85.3891	121.576
321.389	108.534		85.8345	125.169
261.538	92.3784		87.1109	109.851
292.491	96.5225		81.6945	127.604
316.983	87.0601		102.644	111.47
332.073	114.381		98.5073	116.18
298.393	111.649		94.44	109.383
358.474	105.501		94.8345	108.645
346.086	120.324		93.6709	107.924
320.774	101.628		103.533	109.714
286.034	111.003		98.1182	116.81
336.274	107.697		108.353	121.141
317.427	107.988		96.8491	94.6017
187.261	111.832		102.705	99.0952
329.855	122.703		95.6709	118.584
108.585	106.435		105.004	111.68
380.641	107.901		106.871	112.734
365.137	96.1201		97.4982	128.766
278.286	109.967		107.291	113.301
171.38	112.58		104.151	26.1667
273.56	98.97		88.4036	23.7751
280.132	95.4505		97.8018	61.981
241.316	95.9429			66.2358
294.744	86.2252		27.945	79.0271
345.017	102.751		27.0194	60.6274
74.1581	85.9039		27.3411	72.3902
189.286	109.33		28.1496	62.3035
70.218	111.105		30.8535	70.7967
293.675	100.027		28.9054	67.0176
560.744	93.6817		31.0938	69.0949
259.427	112.039		27.5039	65.3049
338.222	87.7117		28.6109	74.8672
306.269	97.2823		34.6039	61.6016
277.987	81.6877		30.6589	61.4472
92.8718	100.294		36.8054	70.1572
853.59	103.405		29.6519	76.9756
310.726	115.042		37.5364	70.8808
304.124	110.751		37.0667	64.8238
381.526	121.156		29.7798	66.7913
850.231	102.204		32.4341	69.122
280.167	108.7		32.3217	63.7317
230.479	109.09		33.1899	105.609
333.919	74.1471		33.5186	74.9262
311.047	92.3183		34.3473	85.2693
350.496	104.952		33.1946	81.271
340.82	112.775		30.3271	97.8645
330.171	109.081		34.1372	79.5678
345.624	113.408		33.3202	69.5232
304.235	100.273		35.0457	105.667
330.197	108.643		32.2922	83.3465
316.957	81.6366		44.8137	80.578
287.15	103.691		43.7149	96.1166
322.692	99.0511		40.662	91.9794
135.081	89.6066		39.8795	82.9777
269.479	92.021		37.6161	78.036
393.355	88.1862		42.773	87.0755
383.752	111.859		42.6976	74.259
375.795	122.601		40.8925	93.9142
320.88	101.444		37.8432	73.1509
280.868	112.438		37.6369	59.1492
329.479	88.5135		37.9229	95.024
293.949	95.6637		38.1334	80.6089
327.863	96.8499		40.5503	85.5695
332.03	91.7718		43.3085	80.6861
283.953	107.838		42.9185	94.0292
288.526	105.634		38.1629	83.8645
367.607	113.757		41.6316	75.8611
137.004	92.4144		43.1041	94.9211
311.491	117.429		41.3082	82.7702
319.209	108.183		44.3082	96.1081
306.991	108.084		44.451	78.837
362.393	135.087		43.0031	90.2882
266.581	101.58		35.4643	92.6055
296.735	95.9309		43.9673	94.7702
397.38	95.2463		48.4531	113.082
341.803	113.519		50.7531	95.916
331.175	112.598		44.6439	100.87
290.765	95.5616		44.002	62.5986
303.932	89.4865		45.9357	84.669
257.162	103.646		45.1735	99.9966
402.714	110.15		19.1	78.9262
287.812	107.156		34.7531	102.432
333.641	118.342		45.1061	92.2487
319.004	81		27.9806	92.048
379.983	105.556		26.8949	94.5695
319.244	93.7237		29.7092	86.5883
283.641	106.841		40.1255	83.8353
342.393	92.5105		38.748	75.6072
409.094	89.8408		37.9378	73.5523
357.18	102.231		42.6235	97.163
336.073	99.7838		39.5194	81.0823
397.265	108.504		48.2316	95.0446
317.675	101.655		41.3286	74.4151
375.154	111.147		43.9	111.139
388.782	96.03		48.0051	81.0429
316.936	81.5345		49.0347	80.175
355.496	110.03		50.7296	73.5592
314.692	95.1862		50.55	57.9177
358.308	107.009		45.6071	87.9708
396.513	86.009		44.7633	61.0103
285.744	100.309		45.1939	101.177
399.068	105.76		52.8541	86.5763
339.209	99.4204		50.1949	76.9846
344.457	110.598		45.6235	102.772
307.53	103.39		51.2888	99.7667
389.06	105.393		51.9133	111.937
332.756	104.847		50.8194	81.2058
344.684	99.1201		51.8745	63.5969
225.803	104.069		46.4071	62.976
340.18	86.973		47.8888	65.4151
353.91	104.904		48.1071	65.5026
257.444	92.6577		46.1949	69.4271
354.765	89.3904		44.9884	81.4168
333.342	110.637		44.9905	87.3036
300.697	105.183		47.6497	69.3173
335.406	100.03		44.3619	83.6638
290.876	101.718		44.6667	83.1767
328.543	108.072		45.5312
304.624	76.3453		48.346	91.7671
310.697	99.7748		51.8106	93.0163
312.906	92.7808		47.5153	99.3561
299.145	89.2523		55.7323	93.1068
297.021	90.3724		54.0169	87.6543
301.192	90.4475		45.4413	85.3234
332.658	64.1922		47.0138	76.6172
313.385	92.1381		46.8836	95.2552
298.316	101.432		46.4815	77.7062
242.402	101.435		52.0307	85.2418
401.44	102.967		49.4476	87.8264
293.85	96.4565		46.0698	70.9985
303.936	98.2252		47.037	94.9496
326.534	83.9489		52.4275	82.9837
302.355	91.2192		38.5651	91.2404
287.043	95.0511		48.7312	82.1766
258.962	82.8979		41.6772	90.8947
324.158	102.805		46.2794	97.8012
316.35	90.7988		45.2148	65.5475
335.244	97.8589		51.3884	82.1276
330.714	92.8198		52.3323	98.3561
292.098	94.9309		49.9206	95.0861
215.679	102.559		41.7926	84.7418
317.205	110.46		54.1524	73.4228
306.615	108.46		50.9471	86.3902
300.004	94.0841		50.2815	77.5801
266.007	101.333		53.6233	87.7315
258.717	98.5405		50.8815	81.5786
136.732	91.6306		52.4667	87.3368
345.312	105.913		50.1598	79.0445
255.68	93.1351		56.9672	101.156
250.413	100.808		50.3429	90.632
259.26	91.9009		51.1439	77.5653
284.234	116.901		48.5196	93.3056
273.19	112.009		51.8571	90.4837
255.108	103.018		45.9767	77.6231
265.111	96.6637		52.6212	112.131
262.502	99.7628		49.9937	88.454
240.944	94.4715		47.8815	94.7537
305.123	99.5826		43.4571	79.9525
254.517	81.3604		51.1048	82.8442
262.617	94.7087			79.951
319.944	83.027			70.1721
146.201	85.8859			74.3249
285.494	93.9459			86.9347
336.119	90.1862			63.8309
302.379	91.5015			74.7374
179.42	97.6877			72.5415
52.8364	94.2973			82.4674
276.431	95.1712			79.1632
194.554	95.7838			73.8902
254.584	121.565			75.4644
88.9517	98.8378			72.9703
126.576	96.1321			64.0163
104.833	93.7507			64.5356
222.773	97.8799			78.9006
273.874	98.2402			84.7061
190.063	107.06			71.3033
253.81	96.4565			82.6803
102.628	90.2042			70.6651
295.569	107.165			80.3981
250.688	110.811			53.6756
343.606	113.481			75.8852
269.234	66.991			78.4391
341.669	106.769			78.719
304.461	94.8168			85.4016
296.632	102.847			81.2787
249.84	111.91			70.0937
299.439	94.003			89.0246
278.052	103.706			78.767
382.468	100.685			84.1874
266.848	94.8649			70.3466
262.357	89.9159			75.7412
304.952	96.7387			69.4614
270.026	92.7177			63.4075
237.037	80.3423			66.5761
159.234	94.0691			61.7447
275.572	84.2072			72.2108
264.052	104.51			65.1803
245.141	84.6156			62.9977
121.509	81.0601			67.7611
236.97	86.6216			70.9438
324.755	78.5165			67.507
261.149	85.3964			55.2623
278.743	93.012			58.808
247.94	106.195			61.4731
269.773	110.892			62.7037
228.833	80.5375			74.1206
344.271	104.91			57.8267
287.416	104.928			62.9766
243.134	73.3994			61.3489
266.461	98.2613			52.6639
249.769	99.7477			88.5293
227.048	95.7688			54.445
444.595	120.745			64.6323
290.145	64.6306			57.2998
159.034	113.919			60.8841
167.379	106.204			58.8513
299.219	96.9519			68.4649
254.13	100.372			63.5457
273.164	102.216			58.2377
250.45	84.9069			63.1159
288.658	81.806			62.8197
240.078	87.168			82.37
225.524	84.14			51.5796
248.528	94.028			55.7646
199.357	85.274			60.8712
199.045	84.426			59.9403
220.108	80.212			56.7248
228.699	81.534			56.2482
199.784	83.186			62.4778
248.766	77.84			64.1616
296.472	78.86			64.3454
239.58	91.224			74.5656
237.335	77.112			63.8326
314.249	84.936			52.2506
218.517	88.112			52.8232
224.918	81.97			59.4415
185.453	84.512			60.6499
243.691	95.726			62.8466
278.39	87.644			66.5539
296.32	85.82			49.7623
233.643	62.782			68.4567
249.506	87.206			57.3642
233.387	82.954			45.2529
224.375	78.396			72.7026
278.476	92.558			47.2518
265.717	80.462			65.0141
245.539	76.398			64.8044
281.903	85.8			54.8841
244.491	76.456			66.2775
292.041	82.028			46.8044
224.71	79.266			59.5199
276.725	79.21			60.6956
190.465	96.392			58.6276
271.937	85.786			63.6417
261.208	85.826			70.9871
233.085	90.682			47.3033
246.859	84.458			55.692
223.03	82.118			47.8677
233.888	79.734			52.2506
270.963	79.548			62.9239
292.836	88.854			74.8607
253.885	73.442			52.8044
222.268	74.55			50.048
202.695	90.068			62.6698
213.39	87.452			49.6358
234.762	91.948			48.1183
161.102	66.702			52.8044
248.241	75.496			74.4098
195.786	83.026			35.0585
176.663	90.504			55.589
283.325	91.582			51.4215
175.154	89.026			53.822
183.684	85.994			42.0375
218.593	84.452			52.0316
215.235	77.962			50.5141
158.054	85.78			49.1803
191.753	73.624			54.4742
179.078	82.412			62.7002
197.066	73.766			51.8747
212.051	86.37			60.966
204.744	82.332			56.1956
192.527	77.526			49.9672
210.217	82.216			48.9192
225.928	76.65			49.9215
211.581	90.16			46.1991
123.53	85.158			51.0105
236.789	77.642			62.6639
766.217	78.184			41.4953
217.843	95.408			84.4186
205.066	93.932			76.969
205.645	92.618			79.9192
206.967	85.286			76.7052
201.874	77.82			81.786
208.187	83.222			59.6676
204.786	85.13			73.1723
197.87	80.804			77.6581
215.163	89.91			77.8816
216.199	79.096			88.2005
125.669	83.698			71.3432
246.548	82.722			88.4751
252.13	93.334			59.3459
227.593	72.862			67.4051
222.124	76.97			89.1642
263.84	88.036			78.8843
87.2801	80.67			68.0579
182.816	83.08			79.4724
140.566	89.31			86.0404
300.599	86.708			87.0888
224.413	68.444			61.1844
277.151	78.066			87.9071
112.5	97.016			68.0942
164.642	92.316			78.2557
277.843	83.496			66.0538
119.003	87.246			79.4536
188.777	88.248			79.716
211.268	84.576			73.4307
239.916	88.432			73.7591
192.825	73.476			77.0108
84.8765	76.07			83.3836
211.331	86.142			82.3122
231.265	77.074			81.0148
72.9789	84.69			73.6016
103.874	82.964			77.1871
445.045	82.444			68.3311
204.578	77.65			41.8371
223.952	83.046			83.2934
100.518	87.076			59.362
128.024	88.304			46.4293
211.696	71.068			80.786
179.946	75.796			50.5612
145.729	81.654			50.7147
229.955	99.356			74.3885
243.696	89.686			70.6963
228.611	86.348			64.3529
196.494	81.604			70.9932
218.783	86.094			82.5458
202.175	95.386			64.7565
220.099	86.926			74.5007
242.114	85.89			76.2818
225.346	82.84			71.5103
233.401	82.066			61.6047
190.548	80.682			66.3269
100.422	80.272			78.617
229.895	81.08			68.1655
162.717	78.604			72.0479
251.88	91.002			77.6416
226.997	80.208			46.7182
60.9157	86.948			64.922
71.0422	83.906			76.0889
183.374	85.666			73.4596
132.319	78.844			78.7702
116.678	76.908			71.8304
194.247	97.034			72.6238
224.009	88.458			56.3694
142.88	78.664			68.0123
165.497	74.192			67.6183
150.831	85.872			67.1642
157.928	79.766			72.1888
40.0602	93.928			72.1286
203.663	83.908			60.0369
216.846	73.188			71.7715
187.56	90.358			75.725
234.822	80.262			74.1012
121.467	91.604			71.5923
217.864	89.634			60.0588
213.66	79.144			67.5048
175.057	74.866			67.5103
205.642	94.024			82.1984
201.645	75.456			72.4624
206.515	85.934			71.1149
200.027	87.264			56.9124
199.268	81.586			65.5773
224.376	81.382			66.8906
216.374	78.916			75.9959
201.503	82.068			63.383
141.991	78.25			61.3434
42.247	81.374			73.5431
236.226	76.19			75.9111
171.024	76.794			79.2777
199.229	84.618			67.9494
50.8434	90.068			98.5226
207.792	79.812			74.6224
216.861	86.306			68.5335
88.3735	84.668			62.4651
81.9307	83.568			93.959
148.843	85.13			73.5978
46.741	87.05			73.6512
143.458	86.322			71.8851
125.919	79.26			79.9699
179.59	73.886			61.528
203.868	69.652			76.4022
192.687	81.602			71.7702
164.878	87.272			62.6279
176.159	78.61			73.0246
146.713	76.4			62.5445
161.719	77.926			70.9494
196.597	73.69			64.922
210.704	76.274			62.0971
180.383	79.884			79.5349
187.815	86.872			69.8304
193.369	84.322			75.3817
168.744	78.182			64.1628
195.642	87.534			73.9179
245.452	80.772			68.1327
181.372	88.748			69.896
184.534	80.724			59.7715
168.855	83.86			76.6416
165.153	80.326			68.7319
196.207	76.43			65.0862
232.54	82.896			71.5636
183.117	71.902			57.7647
216.173	75.636			71.9357
206.767	96.936			88.9918
126.565	82.112			58.409
276.136	85.484			58.9124
183.085	80.404			82.6389
200.727	83.72			62.3023
181.812	81.826			64.684
170.287	79.33			75.513
178.219	73.08			69.6183
180.96	78.962			81.1943
190.46	88.454			60.0082
186.298	89.048			66.829
193.571	91.32			81.1765
178.582	86.062			69.881
124.048	76.01			65.6047
185.492	87.412			65.2476
151.008	78.128			75.8687
179.312	92.692			64.3215
163.349	84.59			98.5075
125.918	88.758			53.9918
105.693	63.106			73.2244
151.568	84.364			60.4788
137.716	85			88.7004
109.628	69.236			65.3201
207.165	83.51			72.409
177.883	67.466			84.212
189.784	88.768			77.041
184.736	88.566			76.9973
227.361	87.156			80.4747
159.352	83.952			78.0684
186.008	72.57			80.5335
189.327	85.27			83.6211
150.704	82.226			73.8564
176.551	66.158			77.5841
192.804	93.2			80.591
177.378	95.462			74.5034
368.409	80.886			78.3461
164.815	71.738			93
188.796	81.994			87.5331
175.832	72.676			85.5467
237.117	84.808			83.7354
168.258	81.87			92.9922
211.258	86.538			65.5525
181.196	83.504			90.8054
202.48	82.802			85.7704
220.065	84.744			90.2626
167.727	78.814			101.889
161.713	83.044			101.685
177.622	85.748			91.4903
176.028	75.174			86.4086
172.435	76.366			99.4942
173.398	71.982			88.4708
185.04	84.894			88.1984
169.435	84.472			90.7374
182.832	84.194			114.798
185.742	82.156			97.9533
179.75	85.704			105.99
154.329	89			87.8327
235.258	81.698			82.7393
183.827	77.362			110.049
125.31	84.776			127.757
189.062	82.632			83.3735
217.622	83.654			104.533
150.082	83.966			89.3035
156.219	76.374			93.1984
173.034	64.87			87.9086
169.307	81.596			79.8658
194.742	88.35			93.9611
160.818	84.838			104.14
203.395	75.246			102.169
174.878	79.678			84.8911
161.753	87.602			110.839
199.293	74.702			80.5447
240.165	86.39			97.2276
169.517	83.564			94.8774
162.247	78.594			92.607
199.435	83.25			89.9241
192.409	86.62			106.496
184.145	96.368			105.842
180.614	87.076			100.981
197.517	85.568			100.249
194.764	82.308			94.6051
158.21	64.844			92.5292
225.457	84.154			95.2568
518.719	97.79			106.829
182.733	85.79			89.8035
186.389	74.162			112.817
191.284	85.136			91.0058
154.673	79.438			89.4903
177.395	85.792			115.905
207.142	79.162			89.1265
145.114	79.19			96.0447
168.031	81.618			105.288
166.207	81.606			102.288
188.418	86.408			100.461
149.554	75.604			90.2607
47.696	80.666			88.6693
56.5852	89.004			87.2198
75.7812	67.78			97.572
198.429	88.07			120.776
163.801	81.45			113.253
212.531	82.302			87.2802
81.3352	82.44			102.735
530.185	72.866			91.0778
180.097	87.926			87.858
177.909	83.076			96.5875
152.537	82.902			98.428
173.838	71.156			101.134
245.421	86.94			98.5078
177.312	81.322			103.739
169.747	79.472			89.5875
185.94	76.814			93.4008
104.492	77.456			97.0584
145.807	85.468			101.786
152.875	75.13			94.8288
158.886	93.54			81.9611
189.52	84.992			97.1187
156.324	81.908			93.6673
170.48	82.442			107.916
130.27	75.54			94.0778
186.023	85.086			83.823
169.653	88.224			84.677
190.815	72.452			93.1946
165.156	86.08			92.9319
175.104	87.756			89.0331
132.094	77.496			100.574
130.362	74.622			88.1634
111.03	87.134			104.518
122.466	79.602			87.323
115.902	88.538			93.4183
116.636	73.04			62.8891
132.264	88.236			89.0233
163.83	74.09			97.4689
132.162	78.082			85.5039
129.598	70.006			95.4689
117.64	77.952			83.5389
147.517	70.944			101.362
132.253	79.164			86.0642
135.909	76.904			103.072
125.417	68.688			102.012
123.155	73.394			71.2315
95.9979	84.124			106.265
102.168	63.394			104.208
112.053	77.924			118.774
132.84	83.954			113.113
113.923	86.304			98.5875
156.904	83.594			93.7977
128.687	78.096			83.5389
122.451	70.94			107.045
128.885	78.772			102.502
150.313	72.662			104.681
112.428	81.454			107.292
194.694	74.14			119.533
112.677	79.94			95.1148
119.083	81.024			89.0584
122.334	64.786			94.537
132.136	66.662			84.8093
130.189	77.994			98.2802
127.215	85.174			93.6089
121.921	79.498			70.4903
130.03	63.706			117.741
74.7	71.31			85.9027
143.779	73.324			42.0292
148.04	73.922			98.43
118.853	78.85			110.031
130.838	77.148			99.4475
117.143	77.222			93.1051
121.023	76.894			106.165
130.249	78.852			102.77
128.615	75.614			86.3054
130.347	71.944			117.123
150.717	73.378			84.4981
104.236	81.106			93.0642
148.643	76.95			109.356
137.094	72.432			100.453
122.84	86.83			76.3638
127.198	65.922			87.6381
132.453	76.788			96.7918
169.896	71.882			101.549
186.034	96.698			94.6381
132.434	77.744			120.508
163.585	69.228			73.3521
136.24	68.456			94.8366
143.704	80.622			93.7354
118.67	74.704			92.6518
133.768	76.26			109.193
146.687	72.808			86.7704
123.494	72.28			93.8677
139.664	76.486			122.895
139.143	71.646			80.1965
227.706	79.464			94.7043
155.979	85.802			115.072
111.836	79.342			97.0953
129.166	79.068			80.0525
145.313	73.544			91.2315
114.955	47.2564			101.185
169.181	52.2669			108.837
139.5	54.919			99.0097
119.228	51.6312			103.317
118.332	51.7092			109.049
143.653	47.2129			82.1245
176.277	52.946			80.716
144.243	48.9265			94.8599
126.855	55.2174			101.879
135.379	53.1754			92.6206
166.483	53.6777			103.772
151.545	55.4303			107.309
154.194	56.6972			92.7782
137.417	49.7032			105.905
134.821	47.7931			117.144
131.634	53.6657			101
150.032	40.8696			92.9883
156.928	52.7211			113.724
148.494	48.5532			105.327
151.532	54.0555			83.5661
138.928	55.6732			104.177
166.764	57.7706			111.588
164.14	47.1184			99.8988
140.002	59.913			85.8444
144.072	42.2024			103.957
196.751	48.3823			94.5992
123.734	49.8756			90.6848
133.292	58.8756			118.807
116.2	49.3238			98.1265
103.16	55.7421			110.551
132.74	50.8501			105.442
146.208	47.8306			97.2296
181.811	50.1379			93.6498
132.566	53.8051			105.44
163.575	59.6537			83.7471
129.475	53.7196			108.802
241.792	46.4168			117.42
158.211	55.976			114.632
33.1	40.7841			92.9008
292.591	50.4738			110.237
322.13	47.937			108.506
307.538	49.1649			101.772
322.668	60.0495			92.1226
348.696	54.048			109.432
305.972	53.3718			96.537
308.761	53.1844			127.687
294.773	57.1619			136.082
286.445	52.7871			118.442
362.733	50.6342			101.097
353.377	44.8081			109.87
323.972	55.2234			123.016
348.478	45.6942			72.1965
371.138	49.012			111.761
355.409	48.9475			93.2938
298.081	52.6582			111.074
311.68	43.5802
287.089	58.4993
302.198	49.2849
315.377	53.6237
330.603	46.2908
337.551	52.8291
251.781	53.7241
292.51	55.4258
267.684	56.5277
294.611	55.1065
328.024	49.8276
289.931	57.2968
301.611	46.6717
335.024	56.5262
376.081	48.1649
337.818	52.7436
332.526	48.3838
301.057	60.018
739.17	47.8321
292.587	44.8366
310.611	50.8036
299.105	54.4093
340.251	54.3583
362.506	52.6327
367.717	41.5892
303.522	54.4813
360.887	54.7736
274.717	53.1604
343.976	58.4498
342.085	60.2129
305.255	52.5217
295.008	51.1859
277.255	58.7916
311.134	48.1364
290.684	54.6732
252.85	47.1214
298.583	52.1409
244.073	55.7856
182.036	48.7106
275.125	50.8861
185.134	60.2309
315.162	46.3418
310.073	61.5052
170.332	46.5967
389.729	59.3553
328.368	47.3058
250.162	61.892
272.547	58.3223
317.676	48.7721
227.534	52.6342
284.352	49.9985
288.599	55.1484
335.984	53.0615
279.51	53.3403
246.223	52.9295
317.749	52.6792
235.417	54.7526
327.178	49.4813
387.668	61.006
387.717	49.9595
276.215	45.955
349.016	56.8066
338.178	51.8366
298.077	48.8351
325.668	44.9565
161.671	39.6582
136.462	46.961
167.454	45.1904
164.549	46.2744
132.602	55.6402
139.778	55.6462
156.962	52.5157
126.097	47.4033
122.936	53.5367
126.352	41.3178
156.93	26.9235
134.606	52.3943
108.536	55.4933
114.303	49.2759
166.699	62.931
127.854	49.0045
155.307	53.3433
159.748	51.5082
155.829	61.1304
116.602	54.8546
169.002	56.3328
169.112	46.2444
176.456	53.4558
149.26	60.1124
153.167	47.2639
156.269	51.036
471.03	58.033
424.1	49.8636
208.102	50.0975
188.43	53.2204
205.644	50.4948
148.335	54.1934
144.996	45.8576
152.186	46.8171
176.529	53.4468
143.002	54.003
160.919	52.1829
34.5769	45.3973
31.7738	47.2159
120.844	55.2279
91.1131	64.033
39.6946	51.2474
181.127	52.2669
167.195	47.6987
35.7262	56.2414
32.1584	58.084
137.9	50.1619
176.543	53.036
207.452	53.036
32.5905	50.3208
182.731	50.7661
73.629	55.5097
157.378	53.3448
392.321	54.5187
134.968	58.6837
32.6448	57.913
210.403	51.4378
169.67	56.1994
170.423	50.5757
145.815	54.931
78.9864	54.5187
137.844	50.5997
182.514	52.925
171.878	53.5067
164.333	58.6432
152.876	60.063
274.342	49.5877
155.971	56.5667
158.848	47.2054
153.819	53.5517
157.713	48.7466
150.815	56.4753
147.844	57.8606
152.586	51.5172
133.262	58.3778
148.138	31.2174
167.876	53.7241
219.224	61.5847
166.072	52.2459
130.333	56.5667
145.586	66.4243
148.269	61.4138
168.222	52.6282
166.842	44.7121
142.118	55.4018
162.801	52.4768
183.054	51.5532
151.796	58.5277
188.027	43.4168
129.518	51.7151
151.253	51.9955
143.593	51.1035
142.249	50.7751
158.545	56.0495
200.403	45.0465
153.403	53.5037
163.014	53.9205
199.452	56.9745
151.405	46.3748
146.242	51.1304
112.208	48.0975
140.351	53.3463
196.563	52.8456
137.62	50.8905
123.769	47.7361
151.315	52.5187
166.357	55.2489
138.283	47.2234
114.794	58.2923
174.208	51.8801
166.72	51.6687
121.728	51.961
144.817	62.6567
151.577	52.2099
151.609	60.9895
144.871	58.904
129.244	55.4768
217.36	60.4963
138.613	50.3463
140.414	58.6837
123.996	54.9715
145.29	57.3928
178.937	53.5292
157.536	51.1649
152.21	50.7106
188.224	67.3523
124.772	54.4663
172.706	62.6042
166.439	52.6627
145.486	53.9205
145.057	56.3163
150.993	56.994
118.955	57.931
155.097	47.2819
116.968	50.024
180.283	42.1364
168.613	50.7421
172.579	58.3643
163.561	55.979
141.12	34.934
158.633	44.6147
150.038	45.7586
241.726	49.7121
163.106	38.2849
48.7873	49.8801
460.204	51.0765
143.086	45.3103
138.83	49.4753
152.301	57.7226
151.912	59.1409
142.848	52.4378
153.434	52.9355
164.647	47.1289
169.133	45.7331
162.249	49.8381
270.337	50.2504
162.559	49.6987
177.498	51.3103
133.86	59.5907
158.412	55.7136
152.045	55.4393
161.889	47.6582
137.299	56.7196
164.335	55.0465
150.199	58.907
174.52	52.5652
153.568	58.0255
153.457	49.5082
168.405	58.5412
147.907	52.06
115.801	57.6147
184.45	51.4288
161.432	53.9955
161.977	58.9235
157.029	51.6312
162.385	50.8351
72.1131	44.4828
156.663	58.1769
168.525	55.4318
187.658	53.4048
198.885	52.5817
109.769	57.5442
50.1154	37.4138
153.023	50.5832
155.731	59.057
187.443	48.7721
166.593	51.4213
108.606	51.3733
140.787	55.3958
92.8213	51.5427
408.579	52.985
108.19	49.8501
111.704	53.2174
75.3394	49.1529
87.1946	55.2714
51.7036	39.4798
220.607	50.6102
66.2099	52.937
118.985	51.997
185.874	61.4138
72.4656	55.3358
149.332	51.2384
215.351	60.8096
211.149	55.6882
258.416	46.5907
280.176	57.5832
322.393	49.2834
295.832	55.2399
273.08	47.988
258.599	54.7661
234.088	44.9085
314.191	54.1199
279.588	51.7541
241.309	49.8935
273.534	52.907
332.668	42.5112
256.141	128.924
243.595	120.6
274.115	132.808
264.199	152.704
257.462	141.464
189.931	119.572
233.16	116.84
276.179	122.204
173.466	113.62
292.908	133.728
280.928	120.46
224.42	97.88
277.748	121.348
249.561	118.016
219.737	125.256
98.8855	133.36
125.565	113.176
221.886	144.056
236.03	134.584
206.386	133.632
179.66	123.816
274.691	125.812
258.389	134.484
239.08	174.604
219.508	104.968
235.118	118.9
226.97	118.844
297.458	142.3
244.523	128.18
312.275	130.324
246.279	134.74
294.374	123.292
285.813	143.868
286.072	143.584
221.897	131.22
300.24	134.032
254.614	136.2
240.072	131.488
234.443	135.952
228.641	122.452
239.542	118.04
237.149	157.82
221.572	139.008
290.229	133.428
271.252	104.508
254.763	141.44
221.683	146.824
255.905	140.008
219.901	146.168
249.935	125.124
255.607	146.968
291.008	127.264
287.267	113.888
	134.304
	117.384
	116.388
174.464	128.66
137.396	136.892
177.013	139.388
169.887	130.432
150.216	123.956
215.311	149.328
139.045	121.892
167.041	149.84
210.144	144.228
170.513	131.384
170.797	151.3
189.36	121.228
164.995	127.028
151.788	135.488
173.252	135.66
255.414	152.668
207.784	135.432
233.405	137.636
148.149	141.692
152.68	118.812
188.766	135.904
143.482	135.06
188.541	135.412
226.383	140.608
151.302	163.308
281.995	134.104
186.441	150.408
173.649	120.236
172.284	136.964
184.324	143.196
196	130.092
172.005	136.496
224.221	139.064
170.095	176.788
145.635	127.548
173.194	97.628
175.482	147.232
158.541	146.444
150.338	139.428
180.77	110.168
136.536	151.748
196.536	141.42
186.842	113.476
303.396	139.984
212.162	133.992
247.176	146.952
204.369	157.276
183.838	146.984
154.622	133.524
163.122	159.568
183.545	150.7
165.005	146.28
181.887	133.736
191.459	137.312
184.302	140.112
199.005	132.492
193.64	149.26
222.401	131
176.108	112.952
153.631	134.4
161.806	156.024
169.712	131.888
200.288	143.468
201.505	135.892
182.266	127.272
151.054	147.048
161.144	121.5
197.694	162.892
238.131	133.92
156.045	127.904
152.171	166.888
135.513	142.64
249.419	123.06
189.68	132.308
107.563	148.028
162.126	133.092
212.77	158.232
154.932	147.552
199.356	121.464
182.734	134.836
211.252	144.564
164.081	137.144
152.658	128.096
134.937	118.896
198.716	152.36
170.995	155.78
150.734	125.476
154.495	134.236
204.207	135.256
236.023	128.692
195.441	149.748
178.487	156.076
157.5	110.444
150.658	136.18
180.901	136.484
268.401	107.54
201.261	118.8
208.865	125.336
185.865	143.256
174.167	126.436
185.779	148.716
167.383	132.5
174.617	144.988
203.559	133.316
202.446	119.484
112.441	154.604
175.887	163.324
213.176	124.58
230.045	123.764
184.964	131.312
161.941	151.44
179.14	82.808
190.531	128.716
202.252	145.008
187.013	139.696
161.541	90.708
161.509	122.448
229.622	124.264
196.743	152.848
428.189	139.884
138.896	139.736
207.842	110.98
159.041	121.3
167.527	127.7
172.32	132.956
152.838	111.188
174.775	146.512
135.135	144.06
174.671	150.876
185.766	128.452
181.82	101.516
183.536	150.452
180.969	134
190.554	142.256
143.477	129.052
217.617	121.908
198.617	151.468
162.541	109.244
157.977	143.38
165.847	150.216
197.685	163.344
182.694	89.712
195.878	159.608
137.955	148.936
188.613	151.976
133.644	82.468
191.667	143.416
195.018	153.964
219.383	136.9
193.284	171.292
113.928	134.364
118.414	144.06
92.991	140.372
164.959	114.836
191.023	122.656
172.342	126.544
101.545	119.1
155.878	148.252
150.932	109.168
165.135	157.268
166.41	127.204
146.941	136.86
130.451	156.608
170.563	131.212
151.568	127.212
155.842	102.524
170.167	154.996
167.901	157.304
159.297	132.544
128.824	140.544
152.054	143.104
152.892	141.496
182.095	133.268
133.734	135.916
110.563	129.236
148.212	125.54
167.86	129.148
133.649	153.904
171.959	152
167.441	133.748
160.541	136.812
175.149	146.3
175.365	139.772
147.919	124.84
158.662	137.216
167.959	134.088
153.617	140.132
58.717	139.416
68.2665	115.604
69.2472	111.036
78.7802	144.164
95.6264	137.064
127.58	138.556
84.6264	144.224
99.5907	124.248
89.0137	156.536
89.7418	129.612
96.4341	142.6
94.9972	113.656
104.533	135.884
161.676	131.724
77.5907	125.632
92.9972	139.292
93.1621	154.508
123.934	120.276
91.5412	127.784
97.544	132.676
78.2115	133.116
109.478	129.336
109.975	138.232
104.011	126.432
88.6703	138.104
105.486	117.412
111.159	118.152
97.2912	126.064
109.159	136.864
84.1429	154.768
99.5137	124.78
101.876	125.628
98.8324	132.108
110.528	131.9
85.3187	133.008
106.115	117.396
108.291	144.328
93.456	131.14
107.003	165.512
113.321	132.584
92.0165	125.156
69.3599	131
103.247	121.816
97.3874	127.664
92.7335	111.86
70.6401	137.344
93.9313	116.412
107.75	147.232
88.4203	134.392
97.7775	120.676
105.278	127.544
120.146	153.044
146.03	135.312
208.626	146.232
135.684	128.332
91.022	129.108
94.4011	119.44
106.703	124.236
100.679	100.904
156.607	128.508
121.025	119.732
93.4835	123.732
85.522	135.316
88.0137	143.392
113.753	128.14
142.857	124
126.456	135.604
105.459	137.328
114.951	110.188
103.525	133.984
132.341	142.304
106.209	115.212
115.11	142.072
104.456	140.592
83.2198	134.724
121.865	138.992
86.9231	148.856
89.5522	118.68
86.783	133.58
98.6978	117.8
86.695	121.128
95	145.836
110.42	143.816
106.582	127.088
97.2747	43.42
109.613	54.102
170.415	62.95
97.2582	59.036
94.5275	67.608
76.7115	70.936
89.6456	54.744
104.214	58.064
116.929	63.846
95.1346	55.344
105.451	44.094
84.3626	59.736
87.706	62.49
76.6841	62.566
85.0192	53.34
95.3626	60.218
104.368	60.578
87.75	55.03
83.033	63.762
82.2528	56.636
120.113	52.822
97.8324	34.298
107.137	57.104
94.739	54.304
84.3077	56.922
84.1786	67.516
110.69	55.296
99.6731	54.478
60.6896	64.542
85.5055	64.106
87.0632	66.52
80.6209	60.402
92.0055	52.1
97.0659	70.564
93.6868	60.334
96.2582	56.402
89.9423	68.554
73.8022	50.788
54.6099	64.348
95.4753	65.356
84.7308	64.818
63.1264	58.764
95.967	81.186
96.2225	50.282
110.321	66.824
101.264	66.336
87.6346	70.026
98.0247	64.228
96.2582	57.696
84.228	60.46
115.585	56.68
114.931	66.008
118.429	68.042
103.747	66.04
86.7198	66.642
142.288	63.106
104.143	61.08
110.596	66.368
101.415	66.496
109.673	71.958
120.558	65.494
102.857	60.006
92.0494	67.432
107.275	63.618
106.901	54.788
123.423	75.272
103.363	61.988
107.813	70.02
126.566	64.644
101.228	67.606
121.297	71.534
89.8626	65.3
86.5852	58.554
167.346	68.318
133.742	56.738
100.887	63.116
134.148	61.81
99.3626	53.494
95.4396	61.488
100.909	66.184
122.907	63.69
102.874	62.756
78.4313	71.828
113.758	65.006
100.225	65.364
79.7912	61.096
89.8489	60.322
122.203	60.53
99.5082	55.692
126.654	65.414
113.214	60.132
114.849	65.042
108.159	57.354
100.19	56.864
91.9533	57.394
102.827	59.326
95.2857	61.926
110.747	67.276
103.516	64.156
124.25	71.014
103.799	63.49
92.4176	61.744
102.486	65.062
103.434	67.844
108.72	62.862
83.4396	60.516
83.8764	60.148
111.563	67.838
86.7253	64.576
95.4258	67.73
82.2665	50.07
81.5	74.146
96.6236	54.81
101.269	67.36
79.3599	59.194
97.8956	59.918
95.5852	67.048
70.989	56.27
92.1648	56.336
85.7802	55.188
95.195	63.362
94.7115	60.968
101.854	55.616
64.1319	66.696
76.5989	62.288
100.071	65.918
77.022	64.018
92.9506	63.554
83.7335	63.676
80.6511	62.55
83.1456	49.916
96.7418	56.818
70.055	65.49
76.2555	75.02
115.437	50.566
95.8901	60.262
65.068	57.682
130.208	59.28
148.272	77.112
151.192	69.846
119.552	56.748
167.748	54.402
156.668	78.932
124.732	71.602
169.692	71.994
150.936	59.228
111.24	68.51
127.336	65.08
131.592	76.438
118.296	54.748
153.976	62.236
132.332	64.812
85.528	57.806
136.092	59.288
105.408	59.016
153.356	55.336
160.164	66.374
153.064	50.892
154.364	75.552
144.716	48.596
108.512	56.716
67.96	61.47
145.172	60.15
76.728	67.924
142.684	70.754
130.008	69.71
168.78	74.362
66.744	65.698
163.784	69.578
136.728	58.778
176.324	70.74
105.792	60.874
164.592	63.85
134.948	61.5
215.272	48.37
90.62	43.08
141.392	62.45
128.54	69.084
115.392	70.926
107.432	64.764
171.744	68.614
179.216	69.314
129.408	63.36
133.532	71.27
171.052	61.224
113.28	59.754
136.236	66.442
149.624	60.104
196.444	73.504
168.976	69.064
160.9	64.556
145.832	57.544
116.672	67.536
166.964	75.862
147.036	51.182
134.276	68.314
164.028	57.988
123.316	67.324
148.344	65.844
176.876	63.328
165.04	74.018
77.82	67.606
143.536	67.298
153.456	71.722
130.24	66.454
184.5	57.144
107.28	62.71
156.576	54.232
105.596	74.274
168.032	74.208
139.668	64.39
191.608	64.324
147.936	63.574
105.304	61.972
117.076	60.322
146.66	61.332
63.9	65.53
169.996	65.984
85.952	55.672
134.112	68.452
173.056	52.544
167.848	64.01
158.432	68.976
141.94	55.548
118.984	64.052
159.036	75.25
118.604	76.412
139.16	66.29
162.176	66.506
154.64	61.074
152.192	56.986
226.152	63.078
143.84	64.028
120.116	68.904
151.428	64.284
135.828	64.526
141.26	55.106
176.16	69.04
179.868	69.792
116.556	64.46
62.448	59.044
124.16	63.812
165.548	73.64
171.476	67.86
178.708	58.536
71.78	68.56
169.324	57.658
148.76	66.32
57.388	75.468
158.216	77.414
322.924	62.176
103.892	58.384
83.292	42.154
59.456	78.31
149.336	70.486
176.852	61.842
143.008	57.408
125.652	66.376
149.312	68.354
174.844	60.776
77.156	66.216
44.952	74.858
503.724	55.99
184.012	60.71
135.632	65.674
117.98	65.614
79.56	67.54
187.256	59.018
180.52	65.112
137.5	65.86
174.328	57.786
158.2	75.332
156.524	70.87
163.648	65.138
165.328	61.1
191.096	60.73
141.3	56.296
162.156	56.61
184.864	71.566
155.372	73.078
148.132	55.172
159.012	68.702
178.608	57.902
147.96	69.118
146.616	61.482
160.844	65.484
121.34	59.292
126.608	74.246
116.792	80.348
172.02	58.642
118.456	64.126
119.82	70.484
168.02	61.7
177.84	64.412
118.492	52.556
204.972	76.948
121.064	65.434
169.948	60.054
144.804	72.562
69.956	62.65
87.976	62.742
145.596	60.58
164.46	72.576
187.904	61.904
161.588	70.064
142.748	69.97
117.824	65.424
144.66	67.528
321.16	57.146
202.876	60.882
180.148	67.414
179.46	58.934
175.116	61.27
112.9	65.21
132.772	68.184
783.748	68.334
193.268	64.418
144.896	60.138
173.372	63.798
415.952	66.742
142.096	66.4
163.72	56.616
162.672	69.462
151.4	82.226
156.5	53.592
161.4	68.418
146.668	53.632
168.256	55.6
141.56	67.184
152.896	63.54
162.856	59.27
153.068	76.044
174.66	64.644
136.228	68.328
148.904	69.1
139.316	66.842
202.988	64
151.464	46.038
168.028	64.84
159.936	64.17
143.564	48.904
156.724	67.75
108.084	64.488
144.192	49.626
163.324	57.926
149.408	68.702
196.06	60.456
149.372	65.636
161.072	60.384
69.632	58.878
84.336	63.712
142.448	56.258
149.108	66.796
146.12	71.49
126.604	41.944
159.852	64.406
184.856	67.828
149.408	62.534
289.204	65.226
176.5	64.062
146.484	67.79
128.912	60.2
92.468	51.658
101.656	61.666
134.928	64.748
162.02	58.276
102.684	61.872
181.852	71.904
85.016	56.488
151.264	52.522
86.1652	47.418
96.3574	66.704
153.607	65.038
123.513	60.616
80.8499	52.622
79.3964	62.714
176.525	50.594
113.402	65.462
70.9219	57.712
74.7447	57.088
127.736	55.756
105.033	68.94
87.3033	54.044
72.5225	66.574
80.6336	58.97
81.6186	62.824
116.231	64.416
92.961	58.928
99.3303	54.704
92.0451	58.446
88.6366	73.646
88.7718	64.492
82.1501	66.984
113.637	59.216
85.1501	55.71
100.718	67.834
88.9099	54.148
79.6967	66.356
91.8288	56.018
95.5225	68.752
112.814	72.314
93.6877	59.208
96.6547	54.356
91.1321	68.38
83.5225	66.28
94.3483	48.51
81.2703	59.248
83.8288	65.912
80.8469	59.882
93.8739	57.972
80.1291	63.84
92.2913	68.758
114.336	61.93
99.9009	61.408
98.1531	55.824
92.1802	58.826
88.2042	55.146
87.1051	62.306
79.5495	64.806
99.5075	64.712
90.9309	63.682
82.7928	68.99
83.2162	70.118
84.6426	60.994
91.4024	60.988
98.6276	61.776
91.7327	69.578
94.2673	52.466
81.964	62.728
87.1832	73.648
88.4955	66.964
84.3574	61.938
69.1051	47.032
115.372	62.952
95.4444	58.426
71.6036	56.258
71.964	60.694
93.4204	57.242
69.1772	60.052
82.1802	67.626
97.2583	61.076
73.6036	62.498
92.9369	67.538
88.7958	42.464
85.1501	66.106
85.1712	68.584
86.7087	51.98
93.042	56.404
75.973	75.95
80.4925	58.424
101.339	65.428
101.165	63.438
78.1441	59.654
83.9219	75.556
75.1231	62.388
85.8168	52.222
80.8318	54.934
64.1742	51.778
86.1111	53.122
81.8378	59.76
88.006	61.846
85.2703	59.126
108.039	56.28
82.8469	64.318
88.9039	65.846
86.5796	54.39
69.3333	66.672
101.556	66.296
71.8859	69.928
78.3393	54.864
94.8408	69.868
119.045	59.296
88.4234	57.312
91.8499	65.726
106.432	52.722
105.889	63.218
60.4354	56.848
80.9069	56.43
81.036	61.754
79.8679	54.662
76.1922	67.084
97.1201	56.572
87.3904	61.864
111.375	54.458
79.5946	55.682
89.4354	66.364
107.297	65.938
85.2613	59.16
102.351	54.982
92.1291	68.15
83.3273	78.386
68.5856	62.236
80.9429	59.412
89.3003	55.414
71.1592	71.494
31.7327	70.926
73.3363	53.006
76.1081	50.106
88.1592	63.094
74.6336	66.36
80.5556	58.856
80.5435	63.974
75.3183	60.976
73.9549	67.816
66.6937	68.374
82.6006	60.042
79.4144	62.526
87.6607	64.106
84.2793	67.956
99.3724	60.21
104.661	63.882
83.3874	61.898
84.7658	56.672
95.5525	54.98
97.1381	49.292
78.8649	68.176
95.3393	54.084
96.8048	51.324
89.6727	60.578
94.6276	67.35
85.985	61.064
75.1802	55.962
90.1982	48.376
72.8889	46.232
86.976	49.616
114.027	65.058
93.4985	55.086
105.195	51.214
95.4805	58.068
91.7297	75.942
80.7898	59.662
56.036	59.842
78.3063	56.552
72.6967	64.218
102.249	47.812
92.8769	65.522
95.1922	66.792
68.1471	68.398
85.8078	67.886
83.1201	57.512
75.5706	66.148
83.9099	50.72
68.2643	50.986
87.9249	57.416
88.1471	51.902
60.7808	57.536
61.967	60.312
155.108	63.576
147.256	62.156
33.66	63.146
48.532	41.946
50.396	60.826
139.148	55.658
136.78	63.736
141.176	55.056
222.32	51.252
175.332	62.984
175.624	57.84
84.932	56.94
49.564	52.284
201.304	60.562
127.4	55.058
123.232	63.894
159.808	63.602
136.496	59.994
65.532	55.452
198.776	59.364
47.416	58.912
133.176	60.54
128.228	67.814
160.828	65.322
129.72	62.728
162.388	67.186
138.5	55.322
142.776	70.73
178.772	56.316
128.676	64.702
111.528	59.466
126.14	60.094
274.16	51.596
172.144	54.302
127.352	65.86
169.732	56.68
151.08	65.892
241.596	69.38
145.9	67.53
173.396	65.122
121.024	53.972
121.552	70.17
162.968	60.828
176.128	72.162
157.272	68.538
157.836	54.61
162.464	59.39
166.864	61.474
146.216	65.894
224.112	63.808
144	56.712
216.348	62.914
[truncated: 3,764 more rows]

## Sheet: Fig. 5m
Fig. 5m	GATA6 Expression in YSLCs
Day 2-4			Day 4-6
Control	LDN		Control	LDN
0.003073	0.768187		0.402679	0.783657
0.004778	0.727458		0.318643	1.3384
0.058606	0.361655		0.67459	0.216692
1.54383	0.462307		1.17582	0.106828
1.35068	0.0174386		0.067084	0.0120982
0.16462	0.0141326		3.10359	0.433465
4.53659	0.863718		1.72564	0.263682
2.16924	0.563629		2.29227	0.939475
5.39496	0.451571		0.496418	0.159199
2.41311	0.583575		0.289381	0.700287
0.002784	0.332678		2.35703	2.97424
1.17783	0.923118		3.12455	0.542143
0.004085	0.0134587		0.731451	0.432634
0.930702	0.453025		0.055767	0.23957
2.8624	0.112138		0.315272	1.12227
0.959668	1.09208		4.09407	2.13725
0.003772	0.799001		0.342188	0.233788
0.005098	0.176038		0.474248	1.19076
2.31836	0.439097		1.17643	0.254324
3.1172	0.227484		2.7197	2.541
0.004747	0.162036		0.388642	3.49841
0.063945	0.0368087		0.290317	0.52979
1.92618	0.568516		0.316981	1.78503
0.04424	0.463348		0.275882	0.9594
5.44468	2.61875		0.604561	0.731573
0.182221	1.67192		1.24239	1.36889
1.34998	0.741422		1.38508	0.879771
0.010557	2.59311		0.580517	0.438506
0.024487	0.249609		1.13569	1.55348
0.980588	0.0578554		1.87944	0.0338736
1.80364	0.777443		2.46771	0.837517
4.85451	0.674005		0.828451	0.957714
0.213425	0.0510124		0.136884	1.00241
0.004174	0.52712		0.56719	2.177
1.33104	0.136602		1.00215	2.86647
0.002725	0.129475		0.143309	0.520305
0.004268	1.51357		0.650242	1.24319
0.129878	0.444389		0.497578	0.00832561
0.047284	0.0728158		0.466802	0.427797
0.748725	0.828209		3.90798	3.77077
1.79598	0.385352		3.24532	0.710452
0.008692	0.050555		0.589678	0.784336
0.005382	0.499507		1.2338	0.697985
1.61418	0.12995		5.56035	0.465136
3.03039	0.216485		0.165232	0.0149521
0.003633	0.178321		0.216248	0.0137524
0.008502	1.33451		0.212717	0.0271741
0.002345	1.12164		0.067035	0.290087
1.11056	0.130773		0.412244	0.490237
1.4975	1.97022		0.69506	1.43085
4.47341	0.087932		1.38339	0.461778
0.01777	0.474369		2.05224	0.87301
0.640579	2.43315		0.003422	2.13712
4.31794	0.873667		0.35048	0.208647
1.50487	3.30054		0.471864	2.72845
0.002889	0.677802		0.225048	0.236921
0.005989	1.62284		0.217212	0.593722
0.009087	0.190556		0.307722	1.48407
0.009126	0.0818797		0.128047	0.402357
1.41406	2.35052		1.60989	2.35786
0.012527	1.08791		1.66355	0.102712
0.606898	1.09734		2.51896	0.0192238
1.48998	0.197334		0.22984	0.488241
0.39886	0.34062		0.133639	1.00068
0.003767	1.90263		0.523715	0.248792
0.002063	0.852806		0.153225	0.195639
0.642719	0.171637		0.132526	0.678681
4.09037	0.203524		2.30331	0.667569
0.33867	0.83437		0.016327	0.369899
0.171654	0.98841		5.08685	0.637647
4.89756	0.0460929		0.199625	0.317016
0.153877	1.03577		0.624283	0.107738
0.004147	0.043306		0.652843	0.0561783
1.52947	2.03103		1.27426	0.212806
2.25834	1.63489		2.09097	0.607052
3.0173	0.873562		0.276476	0.996249
1.48007	0.842746		2.63354	1.12759
0.003202	1.05781		0.117175	0.527483
0.005683	0.338033		2.519	0.539775
3.81795	0.906709		0.42034	0.771952
1.59294	1.54814		0.218337	1.63788
1.12286	0.562062		1.93556	2.88145
0.044461	1.39485		0.38297	0.341517
3.20019	0.0602447		0.877135	0.315507
0.0052	1.55888		0.393271	1.14151
4.2645	0.382778		0.168904	0.724643
0.695543	0.425939		3.38759	0.262751
0.167754	0.765709		0.561508	0.313961
2.91603	1.40979		0.945237	0.135097
0.005461	0.0327923		2.24876	0.48447
0.090136	0.312543		4.09351	0.65558
0.914055	0.604358		1.2704	0.31527
1.24985	0.825982		0.282211	0.634849
2.47992	1.03318		4.07201	1.83541
0.003788	0.406082		5.36332	0.0104367
1.77108	0.613734		0.25796	0.155666
1.60348	1.56242		1.53559	0.815509
0.170878	0.07549		0.926014	1.58921
1.60304	0.00799116		6.94205	2.56573
1.83391	0.0692432		0.978048	0.929421
0.003479	0.675849		0.697039	2.21413
1.35499	0.85785		0.875462	0.662166
0.573508	1.22163		2.5876	1.11722
0.076924	0.623282		0.732296	0.329084
0.006528	2.50544		0.910211	0.689328
0.258976	0.756622		1.20736	0.95769
5.98183	0.580368		0.521679	0.807336
0.65161	0.40189		1.33091	1.77751
1.48817	2.9545		0.414326	0.0916106
4.14615	0.097486		0.004482	0.122442
0.659375	0.77932		0.178545	0.580133
2.00672	1.38118		1.40911	0.234428
0.736113	0.409216		0.679405	0.243873
1.01589	0.258225		0.885041	0.387987
1.09875	0.515677		1.76694	0.759264
0.022716	0.211213		1.66408	0.443377
1.04917	0.531552		0.121054	0.330864
0.724879	0.267376		4.42201	0.678156
7.78627	1.04955		0.251926	3.53667
3.83465	1.73035		4.10295	0.120425
3.75628	0.629854		0.559362	0.267632
2.3447	0.085033		0.73056	1.11825
0.032281	1.10303		6.73213	0.281092
2.13128	0.43584		0.070559	2.45146
1.78696	0.676474		0.146053	0.6788
6.80674	1.99392		1.36894	0.405377
0.614339	1.62316		4.93026	0.573239
0.013347	1.11151		1.5652	0.205432
0.489471	0.811336		0.124251	0.6668
0.352329	0.219319		1.24051	2.67313
2.01272	0.630646		0.439356	1.81971
3.96842	0.594513		1.49936	2.71566
1.854	0.69205		3.94195	0.313052
3.6316	0.0188178		0.904113	0.895726
1.39688	0.701854		1.64332	1.92319
0.485346	1.03409		0.807258	0.488979
0.887031	0.841843		1.26642	0.806435
0.671042	1.59586		0.325945	0.0773632
3.1275	1.22952		1.83503	0.475948
0.080728	0.337775		0.786826	0.187195
3.21977	1.50221		1.62001	0.180676
1.24464	0.421912		1.23291	0.0822939
1.15073	0.554104		0.996775	0.293016
0.420447	1.03324		0.795234	0.62933
1.16202	0.749211		2.16202	0.167053
2.91956	0.934468		1.48756	0.528164
7.10165	1.65362		0.166794	0.0526634
4.06122	2.26273		0.887244	0.371851
5.14257	0.652165		1.0303	0.157357
3.23901	0.248116		0.923462	0.434235
0.493376	0.193864		0.012884	0.14066
0.611462	1.45124		1.10126	0.0734674
2.58973	2.0196		2.1519	0.708403
1.54137	1.19742		3.52937	0.440304
2.3973	0.152946		0.384982	0.564328
0.175808	3.79815		2.89714	0.271989
3.36321	0.122384		2.62155	0.716389
0.539623	0.535932		0.001739	0.171928
1.00194	4.15265		1.04231	0.511181
5.13084	1.50614		3.79859	0.0568472
2.71272	1.09564		3.7787	0.0765808
0.131615	0.156039		4.10603	0.477644
0.504905	0.135853		2.79474	1.01441
1.25868	0.486993		0.507955	0.224266
5.66624	0.223351		0.221789	0.032411
3.03829	0.622074		0.981694	0.179012
0.649418	0.676871		3.32682	0.015088
1.13975	0.534083		0.870452	0.316794
3.04848	0.963238		4.60575	0.114396
1.63079	0.221062		2.86622	0.0736266
1.49963	0.450572		2.33806	0.0241758
2.3429	0.681899		0.517717	0.83721
1.14011	0.113655		0.324701	1.27677
3.97107	2.06252		1.69768	0.0454623
0.485728	0.431862		5.12757	0.754327
0.30667	0.642875		1.60975	0.0471934
0.319575	0.28474		0.962942	0.00920384
0.244038	2.03218		0.02231	0.523383
0.782215	0.175587		2.38811	0.0223483
0.972951	0.270876		0.020278	0.144788
0.226556	1.03912		0.079217	0.484497
2.16564	0.362349		0.612536	0.657326
0.432461	0.783046		0.246283	0.426775
0.204061	0.472473		0.01084	0.0891843
0.065978	1.21357		0.018414	0.118818
0.126227	0.235535		0.063534	0.631322
1.08317	1.66933		1.64575	0.107129
0.404937	1.91342		0.28944	0.0608447
0.142091	1.08654		0.56641	0.31158
1.68931	0.566072		0.020853	0.099491
0.296337	0.60202		0.051283	0.290641
0.017106	0.206394		0.059149	1.941
0.676316	0.204674		0.022903	0.0495841
0.376385	0.123541		0.026132	0.27137
1.19563	0.52897		0.185657	0.00836469
0.156178	0.854709		0.119817	1.88467
0.002688	0.65226		0.05265	0.183829
0.150729	0.615258		3.70364	5.86623
0.324266	0.568847		0.51496	1.38123
0.50666	0.159493		0.108239	0.0106031
0.601065	0.0772007		0.259469	0.134298
0.976572	0.712825		1.29342	1.18791
0.84103	1.17898		1.8715	0.135151
1.86731	0.456997		3.08721	0.955571
3.16193	0.484816		1.21019	0.659546
1.77672	0.511456		0.529364	0.347567
0.036526	0.398032		0.889564	0.060262
0.008799	0.76175		1.53648	0.255509
0.442922	0.930352		0.341136	0.161908
1.30894	0.575491		0.04025	0.026132
0.923617	0.238897		1.25197	0.110387
2.75145	0.711422		4.3254	0.445354
2.16493	0.414905		5.51331	0.242062
0.533546	1.4229		1.90748	0.435269
0.099621	0.315425		1.42482	0.02821
0.598312	1.42081		0.364389	0.812932
0.518908	0.174662		0.658123	0.457872
3.75683	1.20149		0.931496	0.0367328
4.31096	0.477358		4.03649	0.230956
0.406261	2.44678		0.617323	0.00551741
0.074812	0.720128		1.69205	0.38877
1.86385	0.299969		0.442345	0.426743
1.17293	0.188857		6.8823	0.55127
0.565506	0.050308		0.657192	0.00636591
0.085514	0.0176843		0.298236	0.37443
0.070609	0.0198615		0.437327	0.00379902
0.170912	0.409472		0.508201	0.582047
1.04555	0.734571		0.368022	0.49031
1.84057	0.762067		1.03135	0.50821
0.312232	0.255755		0.981514	0.0284368
0.247746	0.0521555		1.35105	0.00783894
1.07753	0.557796		0.604022	0.00289183
2.65924	1.39386		1.04329	0.0235979
0.362962	0.0297205		1.04345	0.0889417
0.079118	0.194241		1.15535	0.0269466
0.814637	0.269386		0.010029	0.0171158
0.233752	1.47665		0.01738	0.00350578
0.347447	0.0599567		0.674041	5.96185
0.280742	0.089087		0.612609	0.00756823
0.069695	0.215788		5.09647	0.0585202
0.50102	0.169836		1.00886	0.00443847
2.95863	0.262897		0.998346	3.43899
3.03612	0.196059		1.38768	0.486793
0.49236	0.354982		0.480559	0.0341826
0.131364	0.886065		1.11618	0.361124
0.952933	0.20187		0.649712	0.023176
0.603872	0.727218		0.464426	0.0121274
0.854307	0.188331		4.58425	0.0372317
0.081847	0.213648		3.2125	1.02036
0.397262	0.123862		3.16894	0.626374
0.039252	0.942469		1.39894	0.107593
0.339549	1.29087		1.67336	0.00671723
2.13296	0.176779		6.08801	0.118108
0.177589	1.29795		0.293432	0.0137008
0.418579	2.20786		1.53659	0.152093
0.082027	0.407381		0.595084	0.00762907
1.21357	0.244114		4.00718	0.909046
1.26393	1.23969		1.78036	0.0532798
2.24882	0.05077		0.377593	0.00296377
0.236715	0.307765		6.19842	1.29936
0.71916	1.06338		0.318782	0.303668
0.168081	2.41949		2.37436	0.00413408
1.54042	0.285325		1.50463	0.00321732
0.024042	1.43246		0.960281	0.00745614
1.32215	3.92831		2.5233	0.600782
0.341066	0.224106		1.72135	1.05049
0.25936	0.137334		2.33676	0.135016
0.451929	2.20358		2.94542	0.0329888
0.303863	0.328703		9.63981	0.00329641
0.328562	0.570099		0.011996	0.00609685
2.77725	1.15646		0.17397	1.81977
0.902338	3.22695		4.19508	0.43585
0.18816	0.502525		0.792322	0.0661352
0.014402	0.00202422		0.142226	0.141882
0.010095	1.94233		0.211518	4.99233
1.05659	0.00247806		2.0027	0.849972
0.390134	0.172591		0.203015	0.303937
0.436764	2.26386		0.957617	3.11498
0.717773	0.0689032		0.103265	0.00442994
0.638101	0.637056		0.251044	3.86928
3.44461	0.938517		0.991424	0.56431
0.00447	0.211779		2.73684	0.00679169
0.461375	2.09652		0.241243	0.00249519
0.005607	0.0297104		0.408283	0.0264824
0.00962	1.14543		0.353658	0.15981
0.258219	0.360783		3.61051	0.0438924
0.264598	0.176424		3.3011	0.0266157
0.042509	0.00225322		0.337368	0.269565
0.010649	0.910878		3.2434	0.147461
0.011835	0.473366		1.89665	1.78567
0.011258	1.31706		2.70561	3.33998
0.882498	0.116665		0.991238	0.502254
0.289821	0.0226907		4.21237	0.00409572
0.025252	0.0361173		0.796308	0.00968836
0.011611	0.107269		4.0575	0.787118
2.02036	0.18161		2.9722	0.43884
3.36998	0.440792		7.07052	0.0982269
1.05846	4.25044		0.802936	0.0253796
0.003684	0.0395862		0.201981	0.48075
1.23803	0.769308		1.51291	0.172827
0.08266	0.693898		0.678873	0.0344153
0.009442	0.00303521		0.986172	2.27842
0.723542	0.00367721		0.797509	0.573294
0.813821	1.17048		0.196755	0.113072
0.00355	1.31612		0.764697	1.72753
0.018649	0.842913		4.82473	2.24458
0.069372	0.00372129		0.964943	0.0816513
0.108266	3.40605		5.84872	0.23947
0.072491	0.00591757		3.69495	1.55676
0.005328	0.149649		6.30444	0.133606
0.697531	0.0483476		1.69581	0.00634435
0.004485	0.00335997		0.877304	0.111747
0.030227	0.00305879		0.283002	0.820361
1.53764	0.567935		0.424231	0.251312
0.004256	0.00239388		3.73004	0.0325176
0.003967	0.0364632		5.81358	0.339876
0.058687	0.00259031		0.026379	0.00759135
0.006731	0.00283624		0.049231	3.3695
0.913774	0.00475392		2.0126	0.0858474
0.121085	0.00401165		1.10526	0.417116
0.717303	0.00288499		2.641	0.00596675
0.114049	0.403284		0.836022	0.550156
0.004818	0.0247909		1.14474	0.161182
0.006485	0.00334604		2.57288	0.512372
0.001991	0.00673427		1.09579	1.64573
0.00421	0.173242		3.04951	0.0993324
0.007099	0.00866715		0.597497	0.0627571
0.00555	0.00471868		0.934402	5.11194
0.004725	0.00240385		3.0545	1.30106
0.00242	0.0039508		2.41663	0.679636
0.023485	0.561367		0.491045	0.957103
0.006293	0.0044546		0.906588	0.0727531
0.004375	0.00329148		2.0788	1.13511
0.041949	0.0644821		0.99362	0.064454
0.067248	0.0031596		1.49682	0.0865929
0.002988	0.0325563		6.66852	0.634051
0.008399	0.0113839		4.48158	0.162171
0.011227	0.00673468		1.81742	0.461799
0.002996	0.0691666		2.82734	1.78277
0.010226	0.00200905		0.49183	0.601617
0.004182	0.0025012		0.35967	0.767015
0.00966	0.00715364		0.334843	0.350299
0.045152	0.00468123		0.200479	1.03414
0.005596	0.0120489		2.13963	2.63909
0.189518	0.00514578		1.71872	0.439224
0.006716	0.00502012		0.270382	0.610345
0.002491	0.00774238		2.06217	0.0855894
0.002514	0.0140571		2.56702	0.287577
0.008865	0.00403399		0.838942	0.661949
0.080631	0.00260358		0.038238	3.56339
0.004956	0.00228086		0.296897	0.0206165
0.002145	0.00412049		4.87064	1.01309
0.003214	0.0625767		2.62235	1.3564
0.006253	0.00223393		2.34527	1.05701
0.033958	0.00999834		1.46261	0.437268
0.089193	0.00451636		0.547161	0.151562
0.001847	0.0807434		5.53321	1.18328
0.006211	0.00183059		1.01254	0.604578
0.004291	0.00400837		4.6013	0.413465
0.215084	0.021711		0.422313	0.240235
0.006993	0.00401705		3.51659	0.928926
0.010919	0.0027365		2.70072	1.26982
0.009784	0.00364667		0.918541	2.05025
0.010167	0.00361617		1.0843	1.37046
0.005595	0.00288035		3.76355	1.81736
0.005255	0.00226486		2.25576	0.814528
0.006272	0.00342492		0.407417	0.436679
0.005928	0.0193428		0.330757	0.0202638
0.002282	0.0364386		0.607142	0.450298
0.009474	0.0042182		5.74015	1.21934
0.301968	0.00356417		3.54318	0.83358
0.011136	0.00249627		0.663597	0.137252
0.013549	0.246049		0.469103	0.0879785
0.004866	0.0201921		6.01086	0.0803819
0.011387	0.00231721		1.47376	0.918972
0.061358	0.0154173		1.07767	0.226987
0.007862	0.0376061		0.600862	0.551591
0.00985	0.0017202		1.23453	1.14131
0.026556	0.00366853		0.361103	0.512661
0.002784	0.00473734		5.91393	0.271456
0.541916	0.0766213		0.710085	0.174386
0.09769	0.0033575		1.11355	0.0764924
0.158614	0.00397649		1.51873	0.29164
0.00336	0.0329701		0.526206	0.105244
0.003455	0.00254378		1.44919	0.0606038
0.008652	0.00636917		0.558912	1.22475
0.004766	3.50327		1.28696	0.0102562
0.005563	0.00770627		0.46258	0.032432
0.006523	0.290168		0.929837	0.153776
0.006528	0.00381511		0.541628	0.189379
0.045798	0.706991		1.63387	0.349478
0.30346	0.0046867		4.46642	0.265282
0.008331	0.00581028		3.36171	0.397756
0.002216	0.00468932		1.12233	0.31699
0.002898	0.742796		2.12087	0.264482
1.49191	0.00490809		4.14523	0.171001
1.63984	0.123182		2.08484	0.486296
0.774551	0.00209195		1.26454	0.0530406
0.138115	0.00371866		7.23322	0.524347
0.400301	0.0052792		7.19276	0.00357484
0.502601	0.436869		0.017408	0.128636
1.49179	0.001602		0.435706	0.204565
0.683698	0.025058		3.06181	0.0682359
0.442785	0.14881		1.93906	0.597282
2.9393	0.0462639		6.49129	0.0133393
1.68387	0.0047565		0.127345	0.26058
0.51967	0.00549556		0.992195	0.888036
1.45701	0.821961		0.318404	0.0225859
2.9189	0.0653932		0.144034	1.70513
1.13119	0.259696		1.78487	0.425112
0.415492	0.814741		1.33594	0.0655187
1.10168	0.00532223		0.267703	0.0415355
0.764202	0.174941		0.22908	0.299854
0.752667	0.578699		1.40632	1.05601
0.26126	0.7543		0.193895	0.416317
1.36762	0.0093376		1.62469	0.14873
0.491329	0.598498		0.482875	0.128099
0.359784	0.812509		0.330592	1.14792
0.547372	0.104582		2.39339	0.0246779
1.46609	0.115878		4.96014	0.683258
0.755326	0.458443		0.489425	0.867995
0.009977	0.835551		3.94344	0.408168
1.20414	0.324686		0.902135	0.441646
1.11808	0.42575		1.00209	0.732269
1.64596	1.41631		0.33258	0.203067
4.51034	0.0195182		0.005182	0.088741
0.559847	0.972195		0.32955	1.04092
0.224579	1.40744		4.20573	0.181218
0.720523	1.19589		0.736859	0.351058
0.011573	0.325498		1.35324	0.0234845
3.45464	0.152372		0.773982	1.77874
0.213693	0.411518		0.824528	0.015457
3.26782	0.613039		0.035548	0.477124
0.276896	0.761033		1.69806	0.628524
1.42303	1.84357		0.015639	0.073952
0.173851	0.995066		0.019845	1.40433
1.23278	0.0259281		7.75441	0.100179
0.002499	1.25017		0.006836	0.113567
0.31701	0.868602		0.450942	0.0161741
1.3845	0.387728		0.062927	0.287992
0.415041	2.9099		0.012927	0.0180273
3.57074	0.348703		0.063043	0.367552
1.54439	2.80639		1.31983	0.209065
1.7161	0.140125		0.870714	0.135433
0.493263	0.409452		4.65589	0.194547
0.301402	1.30923		1.5843	0.0296122
1.69651	3.20029		0.054442	0.11404
0.444368	0.292797		0.158119	0.487487
0.028291	0.140545		0.003308	0.0470273
0.24721	1.48532		0.039401	0.264436
1.88706	0.577784		0.878517	0.684206
2.07537	0.0785795		0.026205	0.0947266
1.05549	0.796409		1.21079	0.236735
0.025606	0.477515		0.304882	0.315783
0.653123	0.6492		0.020686	0.619494
0.013823	0.681653		2.16952	0.200357
0.006777	0.676972		2.91284	0.0181622
0.508511	0.225336		2.55752	0.294646
4.53806	1.43838		1.52366	0.391903
0.002038	0.245857		3.51393	0.229171
0.795588	1.25462		0.004768	0.0551041
0.004049	1.77294		2.89398	0.30481
0.8134	0.923826		2.64674	0.00556046
0.004546	0.921088		1.04977	0.712099
0.078777	2.01596		1.15186	0.0406834
0.013688	0.108731		0.811012	0.146221
2.68094	1.72815		0.030817	0.00803275
1.82356	0.370185		0.009061	0.0628331
0.004613	3.25347		0.790105	0.191795
0.066781	0.69935		4.42099	0.334496
0.006031	1.27811		0.003362	0.285546
0.011392	0.793265		0.02118	0.965439
0.086127	0.488288		1.10397	0.485643
3.80227	0.674271		0.056663	0.14616
2.23771	0.31295		0.003886	0.0639209
0.901257	0.494107		0.00744	0.0155417
1.75936	0.586765		0.630948	0.202921
0.663976	0.0110721		0.004361	0.30191
0.315975	2.12844		4.30635	0.100457
2.25302	0.61424		0.006084	0.509177
0.007995	0.0455178		0.030566	0.0197346
1.17012	1.23588		0.002884	0.0352186
1.72056	0.00291751		0.017472	0.212364
0.007805	0.00426896		2.87456	0.372069
0.070681	0.036425		0.003018	0.657797
0.016501	0.0131823		0.014381	0.759751
0.747521	2.65025		1.16316	0.910589
0.570721	1.35659		0.006992	0.181207
0.004383	0.422148		0.12705	0.293879
2.71572	2.70068		0.007607	0.0978688
0.010117	0.0463702		0.813276	0.101156
0.011522	0.0156479		0.009316	0.599263
0.008262	1.73181		0.030336	0.080147
2.46239	0.0528258		2.48545	0.0323549
0.009538	0.297224		0.006191	0.987835
0.003517	0.971194		0.003405	0.258158
0.53949	0.760225		0.010846	0.171615
1.91375	0.00297102		0.008018	0.33569
0.010142	1.13907		0.844482	0.0479542
0.006438	0.00595522		0.071429	0.0571022
2.46577	1.20176		1.38064	0.023008
3.68539	1.07061		0.003043	0.623461
0.00248	1.88261		0.028479	0.0329107
0.472379	0.0694388		0.005015	0.0294455
0.003192	1.37889		0.013211	0.00250123
0.001995	2.05656		0.017722	0.543508
3.47684	1.00226		1.16354	0.126292
0.004714	0.372401		3.09355	0.00761239
0.001857	0.191682		1.7395	0.462249
0.001797	0.824663		0.017642	0.0757123
2.29194	0.365884		5.43009	0.147194
0.002506	0.00293575		1.16913	0.309736
0.001735	1.3259		0.113853	0.166916
0.005703	0.338219		0.007434	0.498625
0.002483	0.439323		0.070599	0.00972704
0.009907	0.568467		2.16433	0.288651
0.001989	0.0876155		0.050211	0.0198211
0.001814	1.01917		1.06694	0.00882357
0.002258	0.207795		0.005743	0.231656
3.7927	0.274458		0.092483	0.198996
0.001945	1.01988		0.03071	0.16615
0.002639	0.137839		0.003005	0.151024
3.7568	0.340191		2.59569	0.104583
3.2162	0.711158		0.267873	0.204816
0.003188	0.535419		0.031726	0.1716
0.001685	0.197176		0.778006	0.0433067
0.002072	0.411198		1.40967	0.0768933
0.002649	0.404744		0.032029	0.0157701
3.52596	1.79103		0.018998	0.0295413
0.004435	0.783187		1.51538	0.147705
0.418949	0.0908936		0.033157	0.00271037
2.28878	2.08713		0.338937	0.448542
2.07595	1.75771		2.86517	0.221701
7.50102	0.149474		1.23304	0.00529834
0.205078	0.00385244		0.047966	0.0363461
6.92462	0.179101		0.036756	0.0105439
1.65649	1.24921		0.782751	0.164809
0.002597	0.0022481		0.198261	0.377985
0.002595	0.0681976		0.014381	0.0106795
0.002628	0.858059		0.054504	0.204423
4.94508	0.161295		0.265911	0.327456
0.00209	1.33373		0.08864	0.208662
2.32963	0.677568		0.009908	0.162489
6.01322	1.53632		3.7965	0.139904
1.02688	1.02807		0.198997	0.0533944
0.820647	0.0367536		0.191816	0.0449357
0.003997	1.23921		0.563188	0.0249247
0.003014	0.449705		0.10904	0.066028
0.629737	0.20121		1.25302	0.327602
0.006969	0.492515		0.022312	0.487572
0.035755	0.642658		0.628177	0.0708607
0.002971	0.368637		0.164187	0.733603
0.001671	0.00375875		0.566312	0.127673
0.506915	0.00395537		2.94172	0.144851
0.01123	0.454802		0.056872	0.121018
0.005924	0.503971		1.60735	0.471289
0.98638	2.37363		0.558428	0.638578
0.301158	1.04957		1.59419	0.0167147
0.485717	1.3085		2.15679	0.159101
0.002644	0.00416179		0.112167	0.2006
0.512406	0.247863		0.023791	0.184548
0.469156	0.492143		2.04244	0.0925699
0.052126	0.165218		0.009908	0.186743
0.722516	1.34468		0.004439	0.421981
0.570389	1.67849		0.006055	0.0246383
0.818619	0.00511272		0.006409	0.178327
0.318028	0.0186183		0.008956	2.92508
0.007571	0.0127478		2.46534	0.272464
0.023674	1.00107		2.34026	0.0975251
2.49503	0.00331572		1.71622	0.19264
0.004168	0.748835		4.25638	0.355221
0.005415	0.0051392		0.00859	0.287432
0.004147	0.334188		0.006919	0.0954371
0.00345	0.00809019		0.004937	0.0265583
0.003942	0.00385597		0.006767	0.0434078
0.004001	1.45243		2.37532	1.16788
0.850956	0.134482		0.473576	0.0582902
1.73113	0.00293013		1.16223	0.0633047
1.19762	4.53946		3.33125	0.00541807
1.14607	1.08411		0.115464	0.0456916
0.757814	0.918086		1.92973	0.207082
0.917872	0.78239		1.57072	0.682717
0.862108	2.98785		0.145154	0.93141
0.24638	0.0422915		0.05746	0.0291394
1.32006	0.391966		0.018836	0.241646
0.800107	0.00318036		5.61727	0.43858
1.40337	0.206783		9.52041	0.91435
0.261627	0.293775		0.016554	3.08961
1.07006	2.72774		6.37854	1.03409
0.750137	0.0265765		2.17736	0.214771
1.62515	0.0185361		5.42259	0.452482
1.39085	0.00403727		0.326981	0.101265
0.49574	0.587773		0.019639	0.00831394
0.64274	0.665102		3.9868	0.355956
0.966573	0.00442332		2.22609	0.304614
3.30966	0.0753254		0.011954	0.0367052
0.517802	0.0219343		3.27771	0.0947557
0.499481	1.06281		0.02848	0.325476
1.41807	0.288975		6.27445	0.431854
1.18545	0.00284587		0.01385	2.17695
0.667119	0.00323866		1.2391	1.98695
0.837397	0.00748077		0.042791	2.01882
2.07739	0.774543		0.230706	0.181281
0.591655	0.00535704		0.788002	0.0532896
0.173926	3.96207		0.018819	1.34627
0.785412	0.00536016		0.998973	0.311838
1.13215	1.54872		6.61238	1.82035
0.328871	0.00547124		0.620179	0.399529
1.40364	0.273906		5.90124	0.042203
0.260551	3.48115		1.15549	0.0839019
0.734019	0.00394435		3.57086	0.433575
1.11006	1.34731		0.271117	0.15465
0.611334	0.207201		0.063935	0.204395
0.478092	0.00456532		0.477223	0.358837
3.50152	0.631114		0.582827	0.826257
0.73552	0.0056588		7.39618	1.93881
1.59877	0.00414773		5.60683	2.23408
0.313426	0.00337916		2.05782	0.571524
1.13488	0.00406778		0.041971	0.684611
0.098684	0.00868726		4.30888	0.374494
0.422308	0.00367762		4.25164	0.549232
0.574532	1.72506		4.10431	0.0211748
0.528405	0.810934		0.79383	0.292994
0.326002	0.506735		0.038025	0.381037
2.26095	3.46901		6.38723	0.749403
0.474574	4.13917		0.011026	1.96078
0.353277	0.357537		0.918913	0.528387
0.341947	1.19645		3.61476	2.46776
0.574104	0.292658		0.732271	0.0975859
0.157359	0.0155588		0.016921	0.684488
0.495059	0.0270755		5.83017	0.405607
3.52718	0.00416133		3.65166	0.609217
0.796753	0.487157		2.92797	0.519041
1.43823	0.478292		4.64498	0.558064
2.60493	0.0265521		0.007196	1.36983
0.699905	0.0226344		0.028552	0.282249
0.697043	0.00596676		3.51042	0.554155
1.01167	0.250605		0.001373	0.272731
0.927913	0.0767521		0.049814	3.09985
0.217539	1.0528		2.82515	1.99984
1.34301	0.569742		0.016199	4.59671
2.0816	0.789839		0.416931	0.30239
0.255236	0.214441		0.351032	0.182992
0.009236	0.935059		1.12352	0.639058
1.3081	0.0254165		0.199735	0.354473
0.186879	0.00783547		1.56244	1.41144
0.805254	0.777947		0.480451	4.38453
0.129537	0.00855164		0.014063	0.436785
0.796842	0.345932		0.01382	0.14033
0.792693	0.378768		0.021935	0.00373869
0.700726	0.00568985		0.007527	0.495878
4.14755	0.0167384		0.010928	0.31491
1.20441	2.07433		0.342726	0.635163
1.04894	0.710704		3.35916	1.54157
1.05688	2.44417		0.056742	1.34016
0.797753	1.31183		1.08129	0.0624352
0.921598	0.0059077		0.200987	0.138514
0.969902	0.786252		0.574683	5.93289
1.25589	0.251628		0.040601	1.6036
0.193807	0.0170527		0.119865	0.103591
0.669037	1.8193		0.222432	2.13263
1.05937	0.127306		0.60637	0.955448
0.506792	0.241269		0.434212	1.17256
0.201489	0.0550157		0.55943	1.07109
3.41381	0.196739		0.218062	0.943624
2.03713	0.0840347		0.007398	0.805335
0.602159	1.14252		0.015177	1.03338
0.143742	0.11438		0.141686	0.42171
0.660381	0.0855805		0.368498	0.0740948
0.897239	0.0571372		0.062015	1.01428
1.86254	0.164907		0.715055	0.853307
1.3517	0.00475448		0.183629	0.303563
0.573651	0.230068		0.481904	1.07005
1.18147	2.42984		0.136816	0.414292
0.42671	2.41395		0.109567	1.69609
0.273234	0.0109493		0.597388	0.836062
0.830693	0.784254		0.047262	1.55413
4.60289	0.986925		0.01997	0.352639
0.575322	0.675804		0.086872	0.467028
1.92602	1.06065		0.048788	0.51782
1.88467	0.0423548		0.110527	0.362437
0.606845	0.454583		0.505206	0.364128
0.908191	8.66387		0.034375	1.39714
0.19445	0.0607244		0.974031	0.586833
1.54087	5.34396		0.953623	0.564235
0.290341	0.797136		0.681688	1.12493
1.52655	1.38551		0.113597	0.366816
0.358806	0.601145		0.019065	0.453299
0.760501	2.09566		0.106929	0.855505
1.02851	0.0122057		1.19973	0.0368726
1.51101	0.256575		0.053551	0.777677
1.16288	3.6867		0.089827	0.625045
0.922374	0.328665		1.19289	0.846709
0.344679	0.095716		0.049996	2.46441
0.5025	0.43061		0.659228	0.354627
0.38865	1.60861		0.260096	4.0631
1.00317	2.61902		0.240078	1.55005
2.06099	0.019705		0.377303	0.735191
1.61113	1.35467		0.212995	0.35308
4.19798	0.710926		0.046534	2.20882
2.1285	0.160387		0.384634	1.13639
2.46987	0.0138631		0.022234	0.149536
0.329169	0.0744591		0.361599	1.96294
2.24693	1.97564		0.141875	2.37084
0.935927	0.0366406		0.441755	0.0827749
0.787185	1.14533		0.557097	0.43902
0.575839	0.141305		0.096315	0.0634054
2.47163	0.0546118		0.401077	0.47277
0.865452	0.0159804		0.592491	1.14398
1.21786	0.17414		0.01249	0.104111
1.91985	0.027711		0.301193	2.98214
2.20153	0.0832074		0.258324	0.764928
1.83732	2.89681		0.51177	0.829637
1.06501	0.230199		0.228118	0.841493
0.273681	0.802625		0.010057	1.45535
0.066022	0.0591635		0.131138	0.877173
1.38483	0.106435		0.221502	0.935652
0.210526	1.03978		1.2997	0.644446
0.990451	0.608711		0.436731	4.52503
0.611959	0.336341		0.029574	2.15698
0.483142	0.543056		0.371392	0.385796
0.988533	1.01372		0.39082	1.29431
0.651717	1.17918		0.245665	1.78035
1.40706	0.462401		0.034076	2.41258
0.601067	0.922487		0.104411	1.31275
1.16555	0.0068385		0.368176	2.14568
0.795046	0.921667		0.063501	0.366222
0.730837	0.00637517		0.024279	0.580136
0.536413	1.71989		0.298595	0.18254
0.653751	0.01715		0.066736	0.82043
0.341639	0.0127054		0.241945	1.08087
1.70123	0.0436015		0.041556	1.17003
0.933148	0.0500334		0.042392	0.455108
1.64794	0.00507396		0.043601	1.21024
1.61493	0.0225599		0.073051	0.229991
0.005228	1.35478		0.020986	1.72289
0.032582	0.787579		0.210329	0.266688
2.45161	0.0575175		0.143769	0.591213
1.3436	0.285272		0.693823	0.0723267
2.26207	5.7955		0.139323	0.439033
0.692182	0.00805593		0.492789	0.537132
0.776689	0.00733566		0.176386	1.48223
1.2481	0.0399602		0.691259	0.653114
1.67326	0.00621639		0.051848	0.826958
1.98991	0.0037322		0.051788	0.640015
0.305802	0.00588634		1.17895	1.8502
0.97462	5.812		1.22079	0.229231
1.2872	4.25801		0.119484	0.587818
2.23657	0.00670367		0.229671	1.93989
2.65909	0.620455		0.260187	2.06428
0.798843	0.0171055		0.122383	0.60318
0.543488	0.00483731		0.006479	0.164503
0.213454	2.73755		0.008405	0.855118
1.75221	0.006062		0.214745	1.0088
1.5776	0.00496588		0.451889	1.11895
0.76965	0.00427676		0.424699	2.90997
1.29324	0.0187208		0.152844	0.155851
1.16575	0.0274982		0.026143	0.246498
1.08864	1.32155		0.168188	0.709531
0.981849	0.0623281		0.316683	0.171266
1.18362	0.00804699		0.376433	1.27187
1.41766	0.00436177		0.057112	1.98242
1.75471	1.40176		0.193447	1.97535
1.85194	0.00292181		0.013594	2.07703
1.99107	0.0184699		0.040919	0.0844015
3.19866	3.27425		0.019943	3.1336
1.0618	0.00571963		0.244652	0.78235
1.24786	0.0202316		0.083337	0.830301
1.10491	0.17082		0.552622	0.21813
1.66431	0.00425727		0.189983	0.814789
1.21829	0.0106266		0.124699	0.103642
3.41887	0.0113215		0.02548	0.563293
1.13403	0.00360879		0.603555	1.88191
0.745279	0.00409224		0.12881	1.7774
2.22686	0.00500719		0.318387	1.27743
0.779321	0.0207949		0.502493	0.918949
1.64204	0.0123311		0.488448	1.74133
0.728213	0.588844		0.09311	1.15253
0.001557	0.0277196		0.11886	0.3342
1.00194	0.00407372		0.012633	2.9418
1.2372	0.0053858		0.673041	0.660547
0.155917	0.00366082		0.80778	0.0888241
0.356152	0.00284016		0.074988	2.6935
2.70779	0.017397		0.050401	0.258119
2.33626	0.264894		0.137261	0.27448
1.0835	0.00667407		0.195085	0.2334
1.7432	0.00310406		0.231337	1.77398
2.60004	0.00424501		0.612872	0.94543
4.82439	0.00499394		0.672414	0.68802
3.49633	0.819656		0.309109	0.329664
2.41283	0.00351487		0.104041	1.2526
0.824584	0.00232025		0.13575	0.341136
1.0968	0.00437388		0.183782	0.888776
0.470138	5.3539		0.12115	1.32621
5.41695	0.0132645		0.169364	1.61355
4.63665	3.77504		0.301563	1.12263
3.53388	0.00374923		0.95089	0.166715
1.67758	0.01561		0.005825	0.180082
1.98783	0.00583888		0.098672	0.11771
2.85084	0.0273528		0.137625	0.0231178
1.07826	0.00542859		0.446252	0.203004
1.08541	0.007471		2.21106	0.0143829
1.74131	0.0415258		0.108762	0.149785
5.88052	0.00384349		0.009459	0.154162
2.11491	0.00333124		0.295546	0.00906655
0.742228	0.00637088		0.355721	0.387157
0.501214	0.488491		2.12621	0.08473
3.85718	0.458587		0.046671	0.132188
5.3468	0.00546972		0.079013	0.0588111
1.02444	0.00553035		0.214305	0.099992
1.88548	0.00394357		0.478477	0.595536
0.160374	0.00467207		0.74481	0.232007
2.51622	0.0189205		0.36659	0.0175359
1.54543	0.0267884		0.700428	0.0244328
0.701002	0.481841		0.289625	0.428819
4.09922	0.00358954		0.069282	0.0340552
1.5625	0.00671183		1.32496	0.882615
2.53556	0.00839302		0.036592	0.0054472
0.435918	0.00463279		0.158512	0.0367221
2.32899	0.00382323		0.557003	0.0250115
1.86611	0.00351585		0.983306	1.79455
2.06116	0.0127194		0.003493	0.336015
0.338619	0.00217365		0.257919	0.0065832
0.009927	0.00599624		1.16403	0.0783464
3.48649	0.586122		0.867625	0.130596
0.003286	0.00688496		0.166744	1.85396
0.004966	0.0157123		0.372218	0.00779349
4.39276	0.00409402		0.32037	0.222045
4.32417	0.00545686		0.531085	0.029507
0.016324	0.00174895		0.715814	0.225429
0.00474	0.0103607		1.63908	0.0678569
0.008273	0.00457553		0.546392	0.0112341
0.006381	0.00239682		0.421027	0.418508
0.005972	0.00581307		0.219721	0.474357
8.78684	0.00389458		0.128687	2.40967
0.002784	0.00394831		0.487392	0.0404084
0.007332	0.0129216		0.386463	0.141724
0.008915	0.00190369		0.057973	0.43376
0.006084	0.0132006		0.060539	0.720847
3.68245	0.00639855		0.438152	0.386995
0.008916	0.014738		0.049436	0.337237
0.012438	0.00265784		0.117252	1.3187
0.005698	0.00541075		0.149139	2.09559
0.017291	0.0238749		0.203182	0.00602369
0.008785	0.00248661		0.549738	0.388087
0.010806	0.00964574		0.451321	0.0350288
0.011284	0.00626185		0.635534	0.182703
0.004276	0.0437484		0.639629	0.0229713
4.27603	0.00626874		0.105017	0.0163497
0.01156	0.0108426		0.344875	0.60527
0.003046	0.0062354		0.556827	0.77179
0.006494	0.0181363		0.825781	0.0208881
0.004174	0.00264942		0.213662	0.00742674
0.00616	0.00293495		0.490872	1.41069
0.007889	0.0116819		0.059007	0.0176707
0.005181	0.00191891		1.32162	0.254499
5.10003	0.00303666		0.726792	0.218547
0.005007	0.0101244		0.173308	0.234994
0.011301	0.0103376		0.399159	0.23916
0.025952	0.0139723		1.36812	0.220289
0.01882	0.00697485		0.321849	0.0786663
0.002544	0.00288212		0.689606	1.31649
0.003525	0.00178778		1.40044	0.42532
0.166624	0.0029179		0.640695	0.397315
0.001654	0.0106304		1.40284	0.0186647
0.12176	0.00784944		0.470401	0.987922
0.010883	0.00233169		0.601986	1.15846
0.017245	0.00631961		0.368021	1.00226
0.009019	0.00246596		0.363292	1.29414
4.36541	0.0136835		1.84777	3.43215
0.002849	0.923753		0.358189	2.78962
0.50178	0.00682242		1.04901	0.000945233
0.002179	0.00963909		0.437039	0.0394694
0.006317	0.00791189		0.380432	0.0233263
0.106511	0.00238389		0.490617	2.08933
0.006917	3.36519		0.336921	0.323965
9.35376	0.0175994		0.236649	0.0445963
0.003705	0.00278738		0.50896	0.389776
0.00354	0.00402964		0.88285	0.0295138
0.003768	0.0129133		0.281064	0.92486
4.84401	0.0109023		0.398122	0.197071
0.034596	1.44592		0.002626	0.423209
0.023301	0.0102479		0.003911	0.360227
1.03266	0.367112		0.005735	1.14281
0.003805	0.0104259		0.569829	0.152083
2.49143	0.100787		0.492976	0.0425785
0.003961	0.0412459		0.211154	0.00227522
0.675081	0.00296479		0.016323	0.281756
0.024158	1.38791		1.55663	2.26703
4.65774	0.00236422		0.188077	0.443128
0.003995	0.0129413		0.004992	1.08598
0.004001	2.84034		0.068435	0.686198
0.005265	0.0109415		7.79113	0.14866
4.69813	2.49388		3.162	0.559967
2.34592	0.0104908		0.031301	0.37651
0.00204	0.00579299		0.327553	1.09486
0.005804	0.143483		0.006931	0.018053
0.004153	0.711843		0.865496	0.0144968
0.01712	0.0225326		0.149151	0.419562
0.016664	0.0083316		1.21832	0.0568443
0.005511	0.0491444		0.00592	0.806507
5.9312	0.0236878		0.002602	0.00952628
0.003884	0.0193385		0.84187	0.696701
1.39281	0.00952715		0.330378	0.11665
1.93146	0.0139317		3.10202	0.621523
0.018817	0.0135775		0.005621	0.317134
0.003962	0.0706932		0.433132	0.381058
0.190235	0.323223		0.565727	0.727173
3.55646	0.0083675		0.578342	0.422848
0.004754	0.00348496		0.943373	0.863528
0.006095	0.0052715		2.95481	0.0125726
7.92915	0.0136595		1.49238	0.106769
7.95302	0.01075		0.102279	1.37775
0.005264	0.00699274		0.001831	0.950425
0.004059	3.83515		0.006901	0.0457878
0.004761	0.00432277		0.002956	1.4994
0.02962	0.188316		0.002988	0.10662
0.107763	2.46596		0.537642	0.718942
8.72545	0.0114287		1.09259	0.235169
0.005895	2.89184		0.166253	0.858275
0.004528	6.41973		0.003357	0.426661
0.004728	5.09247		0.003519	0.0100996
0.005847	0.62367		1.15906	0.185334
8.33681	1.64737		0.159278	3.50453
0.005898	0.0046275		0.00176	0.893008
1.46727	0.183872		0.173043	0.133178
4.6673	0.223266		1.17642	0.141282
0.007795	0.873356		0.010106	0.243577
0.008623	0.00680113		0.008138	0.0688452
0.430067	0.0137749		0.002216	0.76069
0.002758	0.559431		1.20594	1.48551
0.002767	0.141993		0.3623	1.23339
0.004076	0.00650512		0.501411	1.00806
0.010306	0.0107783		0.023068	0.0667844
0.003582	0.0620603		0.44298	0.114183
0.0045	0.0207919		0.002853	0.527705
0.008082	0.00401173		0.002475	1.2282
0.003819	0.594275		0.792316	0.769541
0.0028	0.31046		0.001457	0.993885
0.003169	0.5675		0.002963	0.19518
1.11125	1.15142		2.0981	1.02044
0.002863	0.0173747		0.01593	0.196734
0.003969	0.183258		0.009735	0.0633915
0.003928	1.24935		1.72356	0.244047
0.011881	0.00883912		2.91993	0.666734
0.022977	0.0899994		0.002366	0.0792153
0.003916	0.315554		0.001983	0.11568
5.4709	0.00458853		0.002032	0.514524
0.004739	0.480616		0.008043	1.53555
0.003377	0.0620927		0.017056	0.894561
3.76547	0.690213		0.365648	0.856679
0.004857	1.3005		0.018942	0.523758
0.002027	1.76067		0.319556	0.425987
0.006116	0.210617		0.167329	2.32623
0.018435	0.00683978		0.011167	0.747566
9.39391	0.0104268		2.4885	0.171346
0.002033	0.0119242		0.992671	1.0857
0.007659	0.0134453		0.716068	0.236018
1.16278	0.00777211		0.199429	1.74811
2.79237	0.00469996		0.213568	0.0808872
0.004363	0.00960609		0.001881	0.0694762
0.004536	0.006448		4.90396	0.386817
0.009957	0.0150103		0.817544	0.390014
0.565763	0.0180148		3.3244	0.232719
0.214824	0.00549056		0.005078	0.387969
0.08667	0.032782		0.011181	0.260521
0.064919	0.00519533		0.003065	2.30625
0.032458	0.00843476		0.026721	0.187991
0.570508	0.00923271		0.385623	0.0808485
0.046382	0.00715873		1.56201	0.0734308
0.322341	0.200047		1.05034	0.40605
0.010381	0.00744182		0.051386	0.644286
1.1368	0.0169158		0.029084	0.827465
0.007013	0.0062208		1.2609	2.10791
0.008667	0.00350034		0.010689	0.363263
0.008549	0.00618164		2.96458	0.290763
0.784374	0.615983		0.703027	0.335239
0.709093	0.0103072		0.912896	0.342683
0.047859	0.00869794		0.002318	0.329912
0.013425	0.00345967		0.024149	0.431613
0.007816	0.0690548		2.00706	0.425321
0.008467	0.00465844		2.23392	0.412441
0.631735	0.0604325		1.67058	0.579754
0.148167	0.00611418		1.12033	0.09896
0.408644	0.425982		0.110089	0.122917
0.551328	0.0142715		0.576809	0.140958
0.031608	0.00563246		2.80032	0.0370246
1.02792	0.00685205		0.834148	0.989
0.006864	0.303166		0.924147	0.599843
0.086474	1.3144		0.011547	0.386461
0.323912	0.00503361		1.43178	3.20277
0.009275	0.0151371		1.13234	0.195124
0.289756	0.0140607		0.351801	0.22873
0.006976	0.254208		6.69444	0.237699
0.065332	0.00474168		1.39774	0.354121
0.445863	0.00876732		0.044398	0.57617
0.00624	2.02149		0.048847	0.371636
0.027076	0.322998		0.563162	0.191722
0.522147	0.00645908		0.228002	1.17689
0.011732	0.139893		1.48972	0.865111
0.384452	4.61092		1.20154	1.00654
0.016732	0.00620347		0.579397	0.242138
0.28306	0.00350667		2.8787	0.172075
0.008929	0.0279257		1.13848	1.93917
0.013751	0.00773532		0.888584	0.199979
0.00725	0.0364546		3.83019	0.391909
0.154242	0.0791339		0.32203	0.133105
0.089833	0.0209042		0.88885	0.844802
0.003877	0.111209		0.108364	0.189989
0.033307	0.0117766		0.343898	0.117126
1.70346	0.00471546		0.762404	0.367506
0.004588	0.00456231		1.23046	0.219642
0.858807	3.40745		2.66922	0.0253475
0.005417	0.00553758		3.69853	0.140504
0.278311	0.216103		0.173003	0.889874
0.0374	0.00374056		1.11331	0.0295597
0.005811	0.011045		2.65072	0.173107
0.017229	0.00473869		0.205006	0.157831
0.0079	0.235506		0.562987	0.208689
0.005124	0.00654965		0.683326	1.82668
0.003222	0.0431779		2.93038	0.44085
0.011372	0.00357329		0.338994	1.49957
0.00568	0.0216782		0.004078	0.122519
0.003838	0.0155735		0.826369	1.31232
0.013324	0.0616311		3.58446	0.341181
0.006471	0.00730079		1.55482	0.71571
0.502484	0.529475		1.09485	0.630692
0.025494	0.0413379		0.352951	1.42622
0.005576	0.0039004		1.11089	0.100993
1.36998	0.00238322		0.762436	3.54093
0.006625	0.0645952		1.68661	0.246845
0.004246	0.00885588		0.257642	0.136108
0.065546	0.066194		0.882563	1.98622
0.14802	0.00557964		1.22242	1.15796
0.006434	0.29433		5.17014	0.531034
0.002764	0.00242118		0.274865	0.161271
0.051565	0.00345096		0.680343	0.398006
0.00364	0.52482		1.37949	0.336011
0.381419	0.00922323		4.92272	0.175689
0.024034	0.429895		1.30818	1.00794
0.745251	0.184103		4.42691	1.24247
0.05179	1.04697		0.419759	1.86649
0.013354	0.0056884		0.480884	0.855217
0.662562	0.0155412		0.332343	0.413758
0.005957	0.492083		2.1659	0.452509
0.49403	0.0879623		0.041766	2.29749
0.067803	0.00596783		0.292465	2.39529
1.25359	1.21806		0.332504	0.365006
0.350295	0.0118778		1.84255	0.0723113
0.29474	0.0077477		0.338879	0.903634
0.190524	0.0874462		0.272967	0.873214
1.5829	0.00632102		1.04638	0.505077
0.393294	0.0147447		4.65839	0.261221
0.002767	0.259597		3.74382	0.0815017
0.139624	0.00495875		0.381781	1.75797
0.335398	0.150287		0.741349	2.48865
0.35815	0.00585106		0.576098	0.673917
0.16391	0.0100081		4.45737	0.495737
0.493336	0.00849976		4.35217	3.16843
0.007294	0.0177626		1.04815	1.05161
0.550593	2.30708		0.368621	0.320035
0.826991	2.15251		0.152478	1.48262
0.002327	0.00995155		0.869359	0.369601
0.017796	0.00531089		0.639486	0.460586
0.417347	0.00807049		1.01514	2.43993
0.067448	0.182837		0.33696	2.86538
0.449797	0.289552		1.14042	0.765152
0.012857	0.095006		3.09685	2.15763
0.337649	0.0942137		3.1816	2.78434
0.485933	0.24957		0.358908	0.650498
0.035858	0.00689467		1.88109	0.436269
0.005709	0.00754134		0.842547	1.76355
0.388854	0.0621383		0.044781	2.88717
0.158178	0.00698896		0.504261	0.0147725
0.00442	0.00558058		1.5658	0.001512
0.238703	0.116437		5.82165	0.0836585
0.287044	0.00557537		0.819803	0.117548
0.711073	0.0315105		2.63493	0.303236
0.429024	0.00587339		5.20577	0.00320816
0.338395	0.00595152		0.902344	2.73004
1.05845	0.00474045		0.613013	3.09565
0.938115	0.00507771		0.666292	2.0529
0.378913	0.0590873		0.025436	2.00292
0.102455	0.00706383		0.00447	0.4379
1.29507	0.00903793		3.20486	0.0202099
0.47009	0.333625		1.40928	0.117863
0.246396	0.247012		0.310324	0.243864
1.85452	0.0114163		0.307031	0.914181
0.800247	0.00942404		0.394752	0.334425
0.203013	0.00658312		0.246857	1.69624
0.570145	0.682803		0.210704	0.0168245
0.236737	0.0102884		0.150184	2.33752
0.061182	0.532076		0.003977	1.71936
0.363941	0.374609		3.65541	0.32274
0.255069	0.0091055		0.188864	2.2287
0.2889	1.11154		0.355091	2.73699
1.05434	0.401915		0.00399	0.514423
0.430136	0.97297		1.025	1.43277
0.053761	1.99608		0.026534	2.09713
0.106235	0.198484		1.00805	0.0184686
0.964573	0.121281		0.585215	0.885764
0.028185	0.106165		0.309678	0.663973
0.848766	0.081428		3.18555	1.0421
0.285869	0.687153		0.060666	1.62516
0.185492	0.677031		0.626608	2.11747
1.27463	0.162336		0.311844	0.461571
0.04039	0.392945		0.80803	0.00661886
0.070208	0.529268		0.244015	2.80769
0.569427	0.85124		0.321422	3.3084
0.241659	1.12867		0.861667	0.00803122
0.146692	1.21184		1.67666	0.767283
0.314166	0.252123		2.34715	1.54517
0.771016	1.27529		2.77853	1.19578
0.568295	0.105018		0.433989	3.42655
0.019708	0.00641895		1.80449	5.07221
0.025506	0.141308		0.806328	2.48607
0.406044	0.18488		0.451805	1.10416
0.046946	0.742756		2.46886	0.875938
0.062768	0.392998		1.51402	3.01272
0.822255	0.459684		0.506585	0.543629
0.302423	0.298529		3.95814	0.245484
0.64614	0.338358		0.955912	1.60682
0.81318	0.0564047		0.209168	3.33704
0.915485	2.88962		1.47792	0.307206
0.582561	0.0147234		0.586061	1.89889
0.091657	0.145607		0.850915	1.57164
0.855764	0.366368		0.659069	0.164128
0.506367	2.08161		0.452683	4.92184
0.982427	0.689102		1.07157	0.415392
0.439102	3.41387		0.386327	2.44292
0.25141	0.204658		0.266646	0.3844
0.337459	1.21975		1.89737	0.153339
0.732224	1.3996		0.545534	0.32622
1.03855	0.404326		0.750939	3.03781
0.056499	0.293752		0.030541	3.32991
0.177455	0.957856		2.46126	2.78661
0.306403	0.635585		0.004124	0.00204854
0.774066	2.17424		4.21986	2.24013
0.08058	0.00670645		0.587666	1.29157
0.363137	0.34272		2.16017	0.0158618
0.211115	0.990216		0.003884	1.25159
0.82733	3.41966		0.937522	3.13563
0.382772	1.50472		1.61549	1.25657
1.53608	1.39067		0.001118	2.84691
0.948598	1.66042		0.017753	2.86283
1.21974	0.292576		2.48152	0.528092
0.54109	3.0645		0.007774	1.48082
0.217059	2.66661		0.00442	0.00108032
0.45277	1.437		0.104723	0.55806
0.39835	1.49452		0.174914	0.0378773
0.601648	1.02934		0.432797	0.397097
0.739127	1.37809		0.006066	2.81042
0.596154	2.42483		0.70988	1.40972
1.04865	2.38756		1.89622	3.06774
0.181133	0.181313		4.65824	2.23607
0.154941	0.0627554		4.07535	0.00613203
0.544589	0.815748		0.411855	0.00157528
1.93545	0.314191		0.488227	0.597151
0.863452	3.36805		0.513935	0.181748
0.548407	0.00727014		5.83771	0.321523
1.48445	5.32124		0.280827	2.94947
0.410625	0.182305		0.004723	1.9805
1.85348	0.76344		0.002706	3.92784
2.28807	1.30697		0.004593	0.00923794
0.791113	2.33667		0.003658	0.651877
0.268237	2.21968		1.03653	0.640932
1.86874	0.873661		2.29179	1.62546
0.261052	0.217642		0.360135	0.177467
0.58065	0.949388		0.003015	0.0035377
0.124508	0.578825		0.007915	0.214387
1.11194	2.45053		5.51686	1.21323
0.990237	3.895		1.20509	2.52731
1.22996	0.19659		0.004841	2.14128
0.95337	1.0812		0.131202	2.51646
1.80042	0.269581		0.00617	0.99177
0.100071	0.0293204		6.0919	0.0231955
2.53523	1.11322		4.41734	4.64668
1.27711	0.104939		5.07198	0.526824
0.488295	0.527914		0.111988	1.37503
0.210267	0.319899		0.00336	0.143354
0.333983	0.696452		3.37913	0.385663
0.414343	0.896659		0.555202	4.82694
0.14861	0.735004		1.33662	0.299647
1.6421	0.0426088		1.69897	0.285467
3.56153	1.5213		0.145999	0.684946
0.566408	0.141322		0.55819	1.20871
0.260178	2.8292		0.329151	3.0429
0.754547	1.17607		0.378539	0.203574
0.417648	0.25181		0.313814	4.20356
1.97581	1.62939		0.334562	0.302363
0.874364	0.596931		1.83447	0.225425
1.9034	1.20436		5.97826	0.868659
0.737726	0.0919191		3.15289	0.309113
0.642376	1.05724		2.05502	1.13279
1.85224	1.93761		0.004996	0.313404
1.55056	1.40527		0.12126	0.860063
0.866947	0.981124		0.261306	0.078177
0.875991	1.39634		0.133709	1.65771
0.817799	2.15515		2.60993	0.6779
1.16234	0.849133		0.205868	1.07445
1.61931	0.00792803		0.107428	0.246945
2.14646	0.298345		0.088872	0.378869
1.84696	0.0216344		2.70329	0.0403002
0.378091	0.0309683		0.423353	0.71375
1.78087	0.0113365		2.13479	0.0539242
0.976261	0.7106		0.187895	0.148128
0.564086	2.45218		0.294971	1.02196
0.726766	0.165481		0.314354	2.29584
0.608216	0.0141806		1.85541	0.250174
2.05073	0.00525146		0.007585	0.20143
0.762962	0.00464822		0.298634	0.496713
2.36759	0.0111176		0.523303	0.243503
3.75407	0.0251643		0.002835	0.0690391
2.56907	1.45968		0.00481	4.85513
1.94078	1.57029		0.001786	0.0137435
0.262414	0.00353876		0.009231	0.17942
0.710221	0.00576456		0.746953	0.0149926
0.698803	0.0162993		0.485032	0.865118
0.458001	0.00607886		5.60092	0.569502
3.94084	0.00657034		2.24719	0.764228
1.57917	0.00175156		0.296344	0.0342312
1.28599	1.80773		0.263633	0.238333
1.67687	0.00485582		0.370663	0.297497
0.912865	0.97353		0.5172	1.22723
1.8076	0.00289547		1.43607	0.326497
1.49851	0.00366162		0.017244	0.548829
0.925799	0.00274583		1.41583	0.0345266
0.247617	0.00336757		0.231648	1.27357
0.859238	2.06945		0.343312	0.0107589
3.24505	0.343862		0.021879	0.00222135
2.20451	2.5132		5.59238	1.09372
1.34504	0.278507		0.080255	0.00379238
2.45998	0.268893		2.12412	0.00500347
0.529605	1.46826		1.19645	0.00258203
2.35969	0.00373201		0.791269	0.406018
1.83981	0.0136657		6.1109	0.014837
0.766757	0.00296639		0.163863	1.75084
0.232035	0.00578764		0.099701	0.00252625
1.77262	0.00804028		0.132193	0.114676
0.340151	0.00425736		1.09533	0.0259338
3.06899	0.0061249		1.64118	0.00434038
0.680404	0.0141076		0.599096	0.730066
1.07409	0.004223		0.054597	0.840337
0.918985	0.082555		0.406544	0.00138167
0.413108	0.0265203		0.222732	0.0775014
2.47557	1.58701		1.66879	0.0592333
0.341944	0.12456		0.596012	2.55115
0.32409	0.00663483		1.30872	0.692748
1.25892	2.82066		2.54343	0.00165227
1.63814	0.0425326		0.262798	0.772679
0.704039	0.00806308		0.47712	0.00581483
2.60415	0.0163444		0.694186	0.650266
1.02887	0.00503243		1.21339	0.00177921
1.80034	0.00646039		4.8735	0.743656
0.218172	0.475622		3.66152	0.0516809
1.65846	0.00371298		1.95557	0.00757727
1.95341	0.192418		3.16541	0.0373954
0.652886	0.008314		1.20177	0.00329218
2.13146	0.0294547		0.358342	0.748527
1.05665	0.00471782		0.468491	0.669449
2.12652	0.0137977		0.26952	0.698702
1.22425	0.00598316		0.01888	0.0727859
2.37038	0.0147023		0.012114	0.810274
1.52474	0.00645398		1.51955	0.178845
0.683567	0.0276834		0.02166	0.5714
3.91272	0.00301655		0.315001	0.0182721
1.75581	0.0181305		0.129684	0.0134636
1.40639	0.0072507		0.024665	0.00765306
0.395364	0.0174611		0.632476	0.00317145
1.08052	0.289019		0.007999	2.77124
3.47786	0.033834		0.116732	0.00612454
1.27049	0.01312		0.20602	0.0810465
1.20599	0.0337278		0.462126	0.058149
1.3782	0.0297392		1.76811	0.578473
1.14867	0.00561144		0.040549	0.00323131
1.03842	0.0081283		0.383646	0.174452
1.03036	0.10842		0.851149	0.01757
1.24936	0.00297858		0.042516	0.005673
1.48511	0.0245239		0.002835	0.134759
0.843086	0.0672381		0.030357	0.00339861
0.464625	0.0222737		0.026077	0.0608704
1.54244	0.0297296		0.009064	0.00932182
1.06661	0.310741		0.836485	0.232581
0.200126	0.00788258		0.006531	0.11579
0.496496	0.165866		0.041166	0.016367
1.55472	0.0145464		0.455643	0.020816
1.70287	0.0638945		0.217503	1.69689
1.0367	0.00307501		0.407684	0.0453933
1.40955	0.00799622		0.930169	2.15507
1.46567	0.00261409		0.005186	0.0828091
0.236586	0.0886711		0.056057	0.096885
1.55349	0.0400687		0.009441	0.0183119
0.467819	0.0319373		0.98657	0.23745
1.28027	0.0743904		0.024956	0.0308651
1.85026	0.0102491		3.96906	0.0242555
0.761751	0.0140926		0.604654	0.374638
0.423988	0.00371032		0.864538	0.00253951
1.65591	0.00760866		2.3676	0.0135461
1.43722	0.539985		1.43437	0.230535
0.504308	0.0222189		0.223617	0.00371051
0.368214	0.0678337		4.01954	0.0031608
0.582083	0.00190942		0.352631	0.0619643
0.572153	0.0189017		0.009206	0.070496
0.427746	0.0268211		0.922496	0.180347
0.214187	0.00435325		0.015525	0.339038
0.466737	0.0030832		2.14255	0.00874352
3.57487	0.00339333		0.013775	0.00288355
1.54016	0.00541766		2.05112	0.326976
1.45436	0.00304792		0.011386	0.00459522
0.455411	0.0092112		0.012367	0.0160028
0.3884	0.00358546		3.82152	0.00529031
2.45767	0.0029521		0.986507	0.00205935
0.476757	0.0119049		3.21755	0.0276519
1.8495	0.00800714		0.226066	0.00806938
0.329542	0.00776994		2.63787	0.0682253
0.729405	0.0049553		5.25481	0.266226
0.592764	0.00272441		0.244559	0.0083014
1.12574	0.00352561		0.495361	0.00903232
1.36933	0.00333254		3.02393	0.0125548
0.294694	0.00415478		0.380497	0.00711178
0.396735	0.00584973		5.94122	0.00706366
1.57021	0.00351101		0.955684	0.265235
0.327282	0.00666269		1.40224	0.00867952
0.558694	0.0158204		0.154601	0.0049524
0.263152	0.0118228		0.792707	0.0676748
0.664498	0.00255391		0.28891	0.104091
0.151347	0.0110379		0.085765	0.233464
1.20766	0.168711		0.265238	0.030035
3.28279	0.00298465		5.71634	0.0367374
0.481419	0.00379846		1.55039	0.159372
0.483683	0.153314		0.358895	2.08351
0.009963	0.162816		0.863203	0.00812104
0.772224	0.00505451		0.288966	0.0327044
0.192276	0.0391182		3.11611	0.111463
0.25104	0.0199887		0.261458	0.159831
1.91804	0.00538519		7.01236	0.43636
0.450047	0.0866562		0.40068	0.290171
0.236132	0.0320654		0.840993	0.145144
0.901023	0.00465873		0.003155	0.392608
0.121045	0.00235706		0.016796	0.0123057
2.78901	0.608707		1.08379	0.359636
1.60207	0.0186429		0.002209	0.0987741
0.512632	0.00380932		0.158684	0.255302
0.366634	0.274892		0.524338	0.135262
1.37955	0.00458281		0.16028	0.0165632
3.64062	0.171236		1.58543	0.0134437
2.62061	0.215625		0.002206	0.418576
2.44649	0.0514857		0.210701	2.2924
0.453212	0.157572		1.71389	0.0670782
0.498979	0.00709295		1.43722	0.0450426
0.041505	0.00438217		0.3233	0.183306
0.312411	0.303967		0.349913	0.0307637
0.024558	0.0225788		0.299427	2.16684
0.18567	0.0033151		0.113373	0.0283813
0.320084	0.710739		1.07592	0.0601615
1.29245	0.0268227		0.135	0.0452243
0.173881	0.208413		2.07374	0.00864698
0.029509	0.0108279		0.509483	0.367635
0.120706	0.757049		0.137753	0.00908698
0.584175	0.10499		1.15531	0.0452259
0.953404	0.26582		0.358873	0.0504225
2.25828	0.588472		1.80088	0.177906
0.181577	0.0841736		0.995649	0.00528607
0.18657	0.0430893		0.069208	0.00716463
0.906807	0.0135861		0.392499	0.0721941
0.239485	0.124174		0.503501	0.0138782
0.042477	0.00280607		1.19561	0.0244239
0.037277	0.899786		1.20158	0.700591
0.370765	0.676845		0.412189	0.324186
0.667097	0.102668		6.65119	0.00604892
0.04733	0.00872216		2.3326	0.00490164
1.50593	1.85228		1.2807	0.00764134
0.591268	0.0279035		0.048136	0.38398
0.040236	0.718892		1.43674	0.0323674
0.505815	0.436338		3.01045	0.121392
0.904689	0.113582		1.62716	0.150239
0.110392	0.00577776		0.635534	0.00684538
0.052214	0.00340539		1.19849	0.00586734
1.08544	0.00420727		0.002337	0.0473719
0.022362	0.123289		0.840191	0.223278
1.4462	2.52217		0.002481	0.00539284
0.290369	1.73355		1.2669	0.0819554
0.226069	1.41923		0.007986	0.00486047
0.128813	0.185518		1.19006	0.00380412
0.017466	0.0249958		1.4091	0.624025
0.020421	0.595208		2.04446	0.00610417
2.327	0.43122		0.464248	0.0221652
0.026117	0.0751913		4.3427	0.0282889
0.01689	0.00312261		0.426852	0.00586678
1.16891	0.223669		4.73762	0.00430583
0.020221	0.121277		0.272503	0.00459903
1.1885	0.801324		0.878569	0.00764443
0.91481	0.00240556		3.01778	0.470261
1.02735	1.47304		1.60716	0.00429185
0.033134	0.00362546		0.183564	0.0237894
0.140475	1.45891		0.037833	0.763511
0.065955	0.574572		0.693996	0.005411
0.342544	0.00427326		2.00597	0.034396
0.639282	0.00836991		2.48178	0.00520042
2.4642	3.39869		0.745523	0.086508
0.172336	0.00485435		1.96471	0.00437557
0.161028	0.117841		0.299754	0.0116924
0.709723	0.00834203		0.366593	0.0664239
0.046549	1.57611		4.52797	0.0119693
0.03033	0.00440169		0.066308	0.038658
0.11923	0.882919		1.61407	0.42521
0.012893	2.74555		8.91949	0.0167108
2.17372	0.97057		6.07985	0.105532
0.039823	0.188209		3.96332	0.0055605
0.897633	0.00883757		3.7188	0.0109392
0.153759	0.00318038		0.161782	0.0111946
0.027922	0.00365585		0.062181	0.0551448
0.193617	0.0253595		0.017029	0.00879822
0.05004	0.0206312		0.004137	0.00820943
0.43272	0.0219771		0.20904	0.00785481
0.484275	0.0081915		0.048123	0.157786
1.4566	0.00389562		0.014672	0.0061142
0.031642	0.00364761		0.033474	0.0620771
0.209607	0.0097037		1.16045	0.0254355
0.070329	0.00331754		0.007724	0.0330037
0.0233	0.0619714		0.841057	0.420385
0.027869	0.00637971		0.094842	0.0045833
0.746313	0.0133906		0.561634	0.00760973
0.019698	0.00775281		0.034287	0.00462426
1.66355	0.00174906		0.016944	0.00531337
0.212884	0.0108394		0.113052	0.345436
0.042739	0.00456551		0.274607	0.00620176
2.43733	0.018474		0.280048	0.0212525
2.09208	0.0039799		0.0064	0.104523
1.01893	0.00135738		0.075016	0.147636
1.03348	0.0168499		0.711473	0.65085
0.916388	0.00511801		0.010224	0.0269165
0.928901	0.0033977		0.02893	0.0121453
1.03414	0.0043974		0.295071	0.261968
0.529229	0.0163049		0.641844	0.0103738
4.32525	0.00202183		0.008383	0.00698885
0.843475	0.00520014		0.080327	0.0153497
1.15501	1.12218		0.609268	0.00466856
0.568601	1.19336		0.146817	0.0113846
2.05084	0.00201556		0.023013	0.0129865
1.79758	0.064707		0.292642	0.0225522
0.395041	0.877513		0.034756	0.0180586
1.2758	0.0145793		0.012157	0.0806541
0.945192	0.138486		0.315948	0.012167
0.79808	0.0034115		0.271668	0.011604
1.66271	0.327231		0.01154	0.0127505
0.734274	0.00663763		0.032537	0.0682185
0.319314	0.00197057		0.26526	0.00926066
2.8752	1.81967		0.19818	0.0191609
3.3679	0.0534567		0.200198	0.0117844
2.18707	0.0902748		0.170525	0.0117742
2.88007	0.784353		0.37494	0.13228
1.25483	0.941212		0.041828	0.041786
1.68983	1.3596		0.00387	0.00620101
1.21891	0.829059		0.755578	0.178491
0.557436	1.18691		0.289104	0.215766
1.86192	2.69856		0.055174	0.00470276
0.99017	1.27206		0.00916	0.0103692
2.06345	1.49871		0.348483	0.0225647
0.31818	1.87693		0.093118	0.187306
0.164418	1.60524		0.168413	0.00354499
1.05667	3.58181		0.040224	0.161163
1.00788	2.3679		0.002229	0.0584095
0.354302	0.838802		0.402387	0.0573887
1.13691	0.542432		0.00592	0.135482
0.84389	3.10754		0.018343	0.411581
2.70464	4.98551		0.044286	0.00585973
2.67141	2.03063		0.024238	0.0841451
1.04242	1.52435		0.53325	0.0307237
0.599297	1.04515		0.033417	0.00751126
1.70903	0.255891		0.476743	0.0298427
1.54378	0.273081		0.259821	0.0111675
0.729659	1.36827		0.224216	0.0371666
0.335802	1.84495		2.64981	1.0643
0.697145	2.6607		0.16995	0.0412198
0.387444	1.01065		0.004004	0.438069
0.516784	0.972026		0.256219	0.272184
0.215475	0.978753		0.003092	2.91645
0.91178	2.22782		0.542778	4.41606
0.442938	4.50071		0.49843	0.0800962
0.71072	0.54325		0.123333	0.00569013
0.52975	0.266704		1.11391	0.845062
0.450932	1.06964		0.415776	1.39065
0.56752	4.56043		0.006327	0.0181544
1.85936	1.71012		0.105594	0.0204035
1.77812	3.50027		0.055181	1.94149
0.713906	1.65489		0.026396	1.2062
0.508448	0.169663		2.23477	0.905574
1.79788	1.19095		0.053882	0.639525
0.396546	0.92012		0.002305	0.0128668
1.03017	0.207242		0.091379	1.28297
0.748741	0.358728		3.34138	0.144415
0.697607	0.333735		0.19722	0.0111534
0.017333	4.62699		0.044477	0.634248
0.938469	0.59819		0.027682	0.674923
1.40488	5.96543		0.058691	0.974454
0.581705	0.368199		0.006356	0.018153
0.200908	1.57417		2.00516	1.65865
0.989269	0.727673		0.00311	1.66652
3.58528	0.725454		0.00263	0.0376729
0.015113	1.22529		0.019011	0.613078
1.01506	1.82125		1.42565	2.0552
0.170702	1.53589		0.002362	1.27654
0.611456	4.35837		0.009431	0.289189
0.433365	2.13738		3.27889	0.535295
0.043606	4.60519		0.114087	0.235471
1.45623	0.414016		1.19294	5.83671
0.460853	0.526968		0.002226	0.512531
0.811732	1.40281		1.20882	0.0364448
3.98109	0.910977		0.002725	0.0116589
0.485012	6.28226		0.002	2.85158
1.75382	4.11229		0.003194	1.38716
1.36895	0.452927		1.86672	0.688038
0.032135	1.37383		0.002006	4.46172
0.868221	0.357565		0.002586	4.48133
0.660805	1.89658		0.003312	0.655641
0.015637	1.8703		0.002379	0.606735
0.114167	0.202261		0.010178	0.585288
1.12741	1.07306		0.00209	1.03879
2.20647	1.9189		0.007229	3.25231
0.935657	0.499706		0.008694	0.661697
0.987191	1.04858		3.70589	1.71203
1.12922	1.82717		0.004238	0.687678
0.212959	4.04966		1.61001	0.129199
0.785892	2.88798		0.061702	0.155895
0.150206	0.771661		0.025366	1.17855
0.860343	3.323		2.39984	0.268499
4.94465	2.99995		1.20523	0.589662
0.00718	2.4657		0.005489	2.15505
0.105316	1.30529		0.001734	2.53743
1.67412	0.802939		0.102761	0.597906
1.33504	2.18297		0.364288	0.402669
0.473854	0.456958		0.002063	0.317715
4.21316	1.82396		0.007885	0.30564
0.094658	1.08793		0.001859	2.15823
0.647809	0.366791		0.060996	1.2246
0.013361	0.977242		3.90014	1.09786
1.10678	0.464325		1.28692	1.64116
0.406206	1.46466		0.13702	0.898428
0.432868	0.571201		0.641621	0.128522
1.67814	2.11371		0.006055	0.831404
1.30777	2.33061		0.017177	0.281018
1.4169	4.00851		0.009039	1.30715
4.4611	7.1652		0.005444	0.245058
0.989884	0.925091		0.232848	2.37311
1.35884	0.959059		0.827616	2.93951
0.824088	1.18452		0.004161	2.02257
0.455978	0.877104		1.12963	2.1676
0.590273	1.6653		0.85682	0.178518
0.83375	0.157603		0.023594	0.10289
0.739169	2.02709		0.011366	0.756583
0.871291	0.906152		0.134639	3.08669
0.010624	0.422501		0.06572	3.2504
1.06868	3.51615		2.59403	0.532874
0.121253	1.34439		0.023656	0.775395
0.0174	0.126455		1.09528	0.674469
0.989227	0.698388		0.754108	0.947308
0.709962	2.25714		0.657822	1.17176
0.736213	0.101673		3.0137	1.88268
0.242303	0.926348		0.008418	0.705466
0.095683	0.425618		0.015511	0.200497
3.8438	0.0181509		1.17972	0.376367
2.10764	0.857948		0.237722	1.58148
0.258793	1.78546		0.009152	1.40362
0.011283	0.593254		0.011437	0.61961
0.068423	0.539631		0.25779	2.67728
0.066549	0.119212		1.55892	0.252546
1.60396	6.78258		0.28943	1.6163
2.192	1.37341		0.22119	1.98693
0.56881	4.45689		0.007372	0.0308344
0.761298	1.16526		2.43192	3.15916
0.484487	0.881522		0.037747	0.553003
1.61213	0.879789		1.66193	1.31556
0.085267	0.603593		0.008101	0.289722
0.495177	0.327327		1.33837	1.6567
1.02426	5.3414		0.574833	0.821972
0.313268	0.903848		0.028172	0.398984
2.64988	1.46778		1.3171	0.358871
1.2145	4.22803		0.004285	3.64473
0.543706	0.211732		0.378051	0.00819119
1.96501	0.697558		0.809445	0.549422
0.884639	1.04336		0.056021	0.435568
1.49731	2.84738		0.043027	1.10032
0.923033	1.24163		1.10034	0.665451
0.23056	0.372428		0.039408	2.00211
2.89146	1.73529		0.178257	0.273352
1.1132	1.14741		0.468002	2.32654
1.20618	0.57432		3.01272	0.339943
1.00327	0.20476		0.971809	0.917958
1.01073	1.34239		0.050638	1.46285
0.044197	7.02964		1.03608	2.54157
0.833083	0.443677		0.101287	0.212301
0.899349	2.4694		0.013245	0.0140124
1.03937	0.571573		1.46815	1.03345
0.26324	2.80415		0.391483	1.00407
0.988479	1.89375		0.838234	0.445878
2.25648	0.437895		0.195087	0.0217998
1.15461	0.485262		0.117005	0.472312
0.614788	1.05418		0.322292	0.417393
1.15225	0.0277288		0.016046	2.51283
1.26274	0.811255		0.152098	0.870647
0.453204	0.890411		0.169872	1.84099
1.06622	0.00605747		0.268578	3.76427
0.069858	4.71198		0.176147	1.00748
0.809517	0.455277		0.257409	0.5157
0.637138	1.23077		0.195977	0.314061
1.86195	0.091406		0.027332	1.32844
0.573305	0.242137		1.11366	0.281357
1.29701	0.92675		1.94579	0.315128
0.360539	0.225234		1.05845	0.297745
1.65611	1.20575		0.026096	7.39224
0.065685	0.249918		0.34521	0.219636
0.117756	1.00598		0.252154	0.440898
1.26776	0.90646		0.785105	0.00338767
0.498234	0.016536		0.215113	2.10354
2.26897	0.019408		0.060629	0.257673
0.060816	0.867401		0.004984	0.253862
1.51862	0.848426		0.011506	0.229572
0.812301	0.791116		0.020643	3.29827
0.098651	1.99265		0.009925	0.168496
0.007124	0.0495415		0.225489	0.571259
1.35998	2.01738		0.007723	0.308338
1.09123	1.97315		0.548349	0.349606
1.02085	1.29046		0.001592	1.07862
0.011081	0.697169		0.005892	1.5592
0.969379	1.69118		0.784706	0.567307
0.06239	0.684573		0.020016	0.382977
0.062539	1.2887		0.043969	0.0908711
0.05535	0.00384163		0.009514	0.206367
2.51577	3.26197		0.412203	0.173275
0.391642	0.615835		0.650004	1.06608
0.628655	0.812221		0.004858	1.72615
0.404944	0.00339535		0.529802	1.34226
0.71427	4.81589		0.005013	0.0571067
0.089355	1.50053		0.008652	0.702677
0.006806	2.47587		0.130929	0.414307
0.005248	0.00278973		0.007719	0.155011
0.023254	0.463118		0.082146	0.501127
1.0638	1.817		0.005157	1.33784
0.873033	1.12735		0.00427	1.10285
0.203088	0.54744		0.009554	0.374171
0.080436	0.702672		0.059022	0.292823
0.391826	1.06899		0.443912	0.24465
1.23853	0.590161		0.601472	0.0580047
0.105498	0.820486		0.007465	2.24339
0.003761	0.0282379		0.023195	0.593869
0.284975	2.61749		0.009701	1.22762
0.565944	0.869358		0.604901	0.0100882
0.028831	0.335955		0.010557	0.782368
0.474198	1.72406		0.022806	1.00458
0.007496	1.44944		0.34411	0.402737
0.360803	1.80746		0.01102	0.104871
0.816143	2.95297		0.132031	0.102586
1.55912	0.00312411		0.01082	0.627324
0.063519	2.46931		0.310184	0.718894
0.364039	1.2411		0.009681	0.31706
0.007174	1.126		0.24886	0.330849
1.36119	1.23881		0.463205	0.0351112
1.78992	1.04126		0.037368	2.43871
0.005352	1.42268		0.030139	0.286356
2.3837	4.11955		0.436279	0.198402
0.017022	0.0710374		0.019264	0.146773
1.43189	0.783438		0.006898	3.77292
0.47821	0.843563		0.614564	0.26751
0.278137	1.56351		0.33877	0.0266871
0.005424	0.956219		0.21011	0.0164696
0.660694	0.680251		0.276082	2.55143
0.272511	0.451408		0.585456	0.0157507
1.63112	0.26158		0.008089	0.0229409
0.365487	0.805968		0.665897	0.264451
1.82372	1.51925		0.012313	0.285722
0.436263	0.42912		0.07479	0.3602
0.472023	0.452653		0.04416	0.951829
0.053358	0.714238		0.006222	1.12934
0.866636	0.0184301		0.689171	0.16529
0.342388	2.07946		0.258038	2.68825
0.135265	1.17981		0.051213	0.553897
0.002886	1.88785		0.128689	0.55047
0.009769	0.655005		0.021031	1.12497
0.003607	2.24076		0.651293	0.478489
0.251286	0.00650748		0.688457	0.0606891
1.19616	1.47447		0.020864	0.750007
1.34128	0.904304		0.355075	0.346144
0.280469	1.73022		0.092147	0.170476
0.16029	2.25899		0.013379	0.21252
0.552765	3.27337		0.408537	0.511136
0.099572	0.955654		0.077574	0.249396
0.005168	7.83022		0.676328	0.634151
0.299456	1.35591		0.289535	0.326004
0.007975	0.679679		0.167414	0.607331
0.254938	2.62645		0.0574	0.0715824
0.154471	1.23891		0.030732	0.511785
2.10959	1.46306		1.17714	0.178655
1.05438	2.23383		1.90575	0.18646
0.011936	0.966528		0.667757	0.0143521
0.146257	0.243894		0.570008	0.313402
1.40055	3.04383		0.036044	0.330901
1.03566	1.11797		0.567441	0.256946
0.975417	4.87585		0.029715	0.0408036
0.100386	0.808271		0.049949	0.166475
0.982989	0.398807		0.192746	0.10267
0.453953	0.606379		0.026914	0.0241087
1.52907	1.5084		0.218756	0.0437539
0.587541	0.83818		0.477932	0.176722
1.24218	0.00472138		0.875985	0.0214388
2.2661	1.2318		0.169922	0.221684
3.24444	1.32629		0.038087	1.08942
0.842453	1.22182		1.03296	0.0114655
1.84294	0.946053		2.75186	1.17018
0.974137	1.22662		0.684639	0.0597017
0.602152	0.368496		0.73604	0.456005
0.898094	0.614971		0.592835	0.16205
0.165406	2.37882		0.183816	0.233044
1.60599	1.67364		0.006357	0.485817
0.841163	1.55077		0.109993	0.185099
0.03472	1.02737		0.188361	0.077403
0.870625	0.805748		0.506555	4.03142
0.007426	1.6409		0.495406	0.0657051
0.716134	2.20001		0.53673	0.0276124
1.73835	0.709213		0.423001	1.41624
0.047592	0.530065		1.02378	4.91816
0.630081	5.12475		1.54451	0.0686554
2.01106	1.55057		0.187092	0.167295
0.61575	0.563037		0.065546	0.059817
0.019914	4.56619		1.58258	0.00576638
0.99344	0.329107		0.104307	0.110051
3.70451	0.317286		0.503225	0.0859583
0.310833	1.50124		0.589262	0.613088
2.47106	0.900618		0.343169	0.379069
2.22895	0.203111		0.462848	0.119459
3.92739	1.68472		0.610116	0.808128
0.368649	1.82186		1.11567	0.864831
1.99436	0.36547		0.142599	0.128733
1.15963	2.8884		0.069974	1.16806
0.016196	1.84913		0.673609	0.796745
0.331344	0.397699		0.53941	0.450499
1.56325	0.788069		0.187793	0.828921
2.1889	0.474163		0.680839	0.9961
0.693103	0.504151		1.62993	0.51701
4.06811	0.863524		0.297357	0.206223
2.05406	4.18506		0.56408	0.0935743
0.028564	0.937603		0.082944	0.0647858
4.23947	0.164187		0.324923	0.0876226
0.036575	0.999567		1.0535	0.0665982
2.46303	3.11136		0.239666	0.0606228
1.24328	2.0014		2.49879	0.300464
0.573583	0.554189		0.911217	0.0756356
1.07802	0.793399		0.992999	0.624731
0.843914	0.657222		0.261837	0.0193813
1.26664	0.418175		0.117503	0.281161
1.16512	3.04222		0.817218	0.384463
0.388109	0.183094		0.187248	0.362551
0.590733	0.503225		0.26232	0.272294
0.003913	2.78434		0.413325	0.0979645
0.752061	0.289808		0.335374	0.00929605
0.005146	0.517836		1.1363	0.215456
0.521109	0.531439		0.483612	0.199491
0.014974	2.47527		0.340973	0.0847898
4.66311	0.176816		0.136323	0.00365735
1.73465	1.34808		0.340499	0.0114292
0.221243	1.89926		0.464419	0.126133
1.21104	0.819992		0.255402	0.0813943
1.57521	0.542319		0.76245	0.046707
3.18901	1.77312		0.843389	0.0611981
3.16508	2.57551		0.32018	0.953925
0.777638	2.0289		0.342553	0.417606
2.77946	0.78056		0.037988	0.00668843
0.00292	1.16586		0.661884	0.301349
0.003664	0.22303		0.865449	0.252528
1.23668	0.695433		0.773409	1.77292
0.004537	1.19006		0.060988	0.166054
0.306144	1.62559		1.86054	0.28604
0.663227	0.204459		0.788983	0.347388
0.643368	0.277515		0.123106	0.604431
0.878198	0.0595463		3.98547	0.0632455
1.94127	1.10799		0.27909	0.0194924
0.143638	1.53349		0.193219	0.159594
3.94732	9.70108		0.102171	0.530003
0.193401	0.272553		1.15161	0.697687
0.010074	1.86295		1.27268	0.510148
0.048715	6.67678		0.101636	0.124045
0.041892	1.14155		0.419832	5.60182
0.004043	1.34285		1.19396	0.0366643
1.36443	1.03724		2.50625	0.0100334
0.341257	0.803652		0.403137	0.453197
0.078177	1.10734		0.362246	0.0700791
0.014133	2.70674		0.412541	0.530377
0.026833	0.0279732		0.875035	0.0477957
0.005498	1.29338		0.492644	0.00496277
1.01053	6.18369		0.428669	0.303289
1.59177	1.41081		0.058749	2.7031
1.10924	2.01391		0.177757	0.414859
0.904046	1.69912		2.68352	0.557605
1.73206	0.288836		1.14545	0.501644
2.72634	1.32379		0.580249	0.00902523
0.253668	0.403375		1.77328	0.82196
1.28236	0.386347		2.54936	0.0575306
0.544442	4.4081		0.111049	3.24303
0.6631	0.431671		1.51333	0.128788
0.630337	0.74133		0.356899	0.00893458
1.04432	3.04324		0.222133	0.00643712
0.23084	1.00617		2.38516	0.176819
0.512032	0.00792604		0.560073	0.276302
0.925198	0.870112		0.085486	0.0816147
1.65856	1.38023		0.461873	0.417912
0.058359	1.43388		0.519767	0.0112443
0.794453	1.66631		0.342372	0.152471
0.010971	1.19644		0.055017	1.21375
0.908667	1.30358		0.244932	0.28875
0.007506	0.0191915		0.04525	0.0680277
0.119838	0.340934		0.309385	0.648907
0.216872	0.741192		0.044757	0.102249
1.31551	0.337611		0.416524	0.262689
0.004928	1.96599		0.008146	1.24956
1.4957	0.882541		0.238284	1.74101
0.093581	4.7468		0.076852	1.46858
0.265009	0.215035		0.241981	0.358979
4.91509	0.32772		0.047725	1.50597
4.08863	1.05958		0.017765	0.646183
0.037764	1.39073		0.028137	1.24902
3.71384	2.21548		0.024783	5.84472
0.160532	1.59672		5.52212	0.0688244
0.303725	0.0102884		0.008238	4.33766
0.055635	0.918895		0.015525	0.545509
0.758308	0.0958583		5.45764	1.52292
3.03572	1.29835		0.834504	0.362655
3.82249	1.5247		0.32435	4.14613
1.50958	1.09972		2.41152	3.14447
0.009412	1.37686		1.72887	0.79526
0.008685	0.0981436		0.5895	0.110474
3.95512	2.13152		0.494034	0.517472
3.59029	1.32298		0.007675	1.59759
0.12544	0.647699		0.444687	0.474186
0.234679	0.669472		0.606818	0.0517197
0.669108	2.49863		1.57833	2.57133
0.50669	0.518665		4.0202	0.412049
0.211326	0.337999		3.7195	3.32991
0.957065	0.527893		0.448648	0.859541
2.63664	4.73813		0.006625	0.21936
1.46475	1.38374		2.61476	1.16141
0.036137	3.4011		2.50838	0.284102
0.611484	1.17905		1.72327	2.63736
0.099402	0.936496		0.952276	1.97404
0.031786	0.177966		0.00758	4.14987
0.031589	0.293781		1.389	1.87821
0.120444	0.760415		1.25514	0.44654
3.20098	0.362447		1.93013	0.162061
0.253451	0.324404		0.497371	0.0678287
0.680542	0.450791		0.85886	1.05197
0.003621	0.368114		0.6791	0.224696
0.047074	1.4722		5.37442	0.667647
0.00642	1.3276		0.021414	0.051611
6.13041	0.266506		1.45463	2.73038
0.39299	0.413846		3.77733	0.229887
0.048964	3.22224		1.43751	3.21508
0.042175	0.375897		0.140541	0.384586
2.47266	0.167471		0.020596	0.00726574
0.821167	0.260697		0.296276	1.41031
0.766818	0.325596		0.851319	0.0413983
1.50926	0.0860191		0.051124	0.949346
0.008857	0.41273		0.068529	0.475747
0.122928	0.165075		0.134393	1.56468
1.04238	0.573714		1.47456	0.206925
2.76494	0.477259		0.232027	0.226943
0.126443	0.252961		2.1767	2.2478
1.14095	0.0125083		0.298567	1.91933
0.058971	2.61658		0.424722	4.16581
0.523504	0.644269		2.06505	0.0306608
0.712455	0.386295		0.032575	2.13445
0.605985	0.150488		0.739429	0.0388784
0.689609	0.188636		0.478222	0.0321351
1.69417	5.09013		0.048257	0.504793
1.2524	0.314256		0.13466	0.249223
2.17191	0.122177		0.194606	0.691736
3.19576	0.781974		4.95964	1.21916
1.83074	3.84424		0.124545	1.61767
1.71139	0.0220773		0.324632	0.0440215
1.2532	0.223102		0.552307	0.0465644
0.678407	0.117245		0.042812	0.276931
2.44997	1.30169		0.107919	0.347302
0.295643	0.809083		0.811942	2.65356
3.46447	0.203379		0.041536	1.43093
0.00607	0.344794		0.628311	0.576957
0.221884	0.160713		0.046366	0.260527
0.687267	0.926118		0.712928	3.74046
2.82286	3.28871		1.26006	2.13683
0.179888	1.36141		0.224242	0.48945
1.7961	3.34054		3.52839	0.206802
0.003913	0.489618		0.008497	0.156349
2.93241	0.279253		0.398889	0.957531
0.989479	0.735268		0.421724	0.143475
0.492297	0.710172		2.4907	0.543231
0.004511	0.883594		0.993177	0.743796
2.02673	0.0290952		4.90967	0.162833
2.9148	0.740771		0.517844	0.00462537
0.576764	0.483363		0.076577	0.213737
1.38964	0.457586		0.093426	0.716905
3.36727	1.00902		1.27178	1.47767
1.84053	1.19269		0.160898	0.755361
0.886391	1.29923		0.585281	0.600098
0.547307	2.63327		2.59666	0.449715
0.315307	0.711336		0.90028	1.655
1.11714	0.59349		0.361891	0.918725
0.169705	0.557729		0.623917	1.13855
1.47484	1.37123		0.007981	2.12373
0.004524	1.75915		0.294322	0.0803004
2.34116	0.00848457		1.0098	0.0956225
1.70847	2.63536		1.0554	0.0942419
0.210816	2.91175		0.076383	0.984585
3.58882	3.57047		0.610509	0.611361
0.004517	0.579378		0.316218	0.859501
2.07289	0.763628		0.324901	2.06513
0.007019	0.0141359		0.159791	0.27055
2.89743	1.84451		3.93381	0.17826
1.05741	0.513657		1.27065	0.235012
0.948468	4.74312		0.74444	0.00787326
0.006015	0.143544		2.66106	0.199803
0.006713	1.89686		1.67941	0.95637
0.00185	0.762108		5.38621	0.961373
3.38039	4.81994		1.15926	4.91729
0.577752	1.04327		0.174849	3.37615
0.800025	0.597216		0.893144	0.136968
1.37925	0.758603		0.012648	0.0897927
0.009548	2.06549		5.15168	0.631826
0.773364	3.23331		1.71117	0.952158
0.372716	4.24067		3.41209	2.86044
2.96245	4.87723		4.23885	0.682446
1.1583	0.380058		0.024188	0.213654
0.012353	1.03316		1.23206	0.330817
1.64139	0.145318		0.649565	2.40289
0.001906	1.51148		1.85087	0.00909852
2.50228	2.61723		5.02545	0.70613
0.024395	3.29004		4.97141	0.191405
0.550836	2.39296		2.98586	0.67884
1.33349	5.38515		0.140513	0.11898
2.27006	2.09827		1.10357	0.602
0.00967	0.630073		3.51515	0.00977248
0.776413	1.01607		0.09973	0.0201935
0.543651	2.10125		0.598369	1.58335
0.423252	4.22465		0.096689	0.00913586
2.62113	3.80683		1.7637	3.36757
1.50857	0.136113		0.152359	4.39873
2.08387	1.3519		0.012019	0.0399038
0.229683	1.48677		0.011047	0.845931
2.39844	3.61878		2.2804	0.229874
0.756157	1.37772		2.09561	1.10656
1.48479	1.05436		3.64622	0.0141378
0.386582	0.617411		0.084952	0.0718817
2.46846	3.33246		1.81878	0.0244729
1.50995	1.01275		4.21877	4.30279
2.59322	0.326037		1.10178	1.29002
0.569544	1.34479		0.844645	5.40038
0.349887	1.49054		0.034803	1.82441
0.736775	0.0950253		5.04837	0.0052667
1.09031	2.4983		0.014406	0.00443917
0.374119	0.447865		0.035103	1.02508
1.93741	2.14008		0.110607	0.0773131
1.1197	0.472377		5.63526	2.30639
0.469108	0.112142		0.011488	0.133485
1.18503	2.51204		0.015736	0.0044872
2.03062	0.779319		0.014122	0.00341918
0.268279	2.20014		6.92621	4.58371
0.37692	0.594685		0.77614	0.319955
2.04634	2.10875		1.39399	0.00413374
5.24425	0.652815		0.056864	0.198721
2.67144	1.87162		3.14528	0.601593
1.42609	0.105909		0.061388	3.17544
1.43647	4.29984		0.049199	1.76403
0.986467	5.38733		0.013549	0.0056008
0.832806	0.146272		0.007089	0.493612
2.12975	1.77504		0.392084	0.415021
0.532634	0.143185		1.33476	0.77465
0.329022	0.0362804		0.028543	2.69146
3.15787	0.754973		0.315509	4.531
4.08682	2.56229		1.93838	0.646369
0.467691	2.5279		0.356877	0.61061
2.77718	0.49727		2.06339	0.498494
1.58004	0.748871		0.178631	0.745739
0.384611	2.18278		1.61174	0.710785
0.763408	0.00212604		1.18748	0.0797061
0.728768	0.771343		0.055075	0.053129
0.650517	2.45251		0.006787	0.595416
1.63465	4.10306		0.060488	0.261599
1.26145	0.00811577		0.008267	0.428991
1.33298	0.842808		2.01397	0.895331
5.60095	0.498921		0.803717	1.03258
0.407293	2.23147		0.025839	1.19591
1.30514	1.84056		0.065962	0.758534
0.942813	0.00789609		0.128511	0.111173
0.395431	1.61872		0.709017	0.016091
0.985014	2.27148		0.033966	0.020873
1.93448	1.96709		0.095417	1.07882
1.44015	0.305459		2.25032	0.04241
0.668881	0.00282371		0.113254	0.026935
0.041323	0.00407999		0.370951	0.161896
0.618931	0.331793		0.050168	0.035384
1.16846	0.402799		2.53285	0.429712
[truncated: 2,780 more rows]

## Sheet: Fig. 5n
Fig. 5n	%CER1+ of GATA6+ in YSLCs
Day 2-4			Day 4-6
Control	LDN		Control	LDN
45.977	46.2366		31.2057	27.7311
51.8518	31.4286		27.6191	11.7117
40.1961	38.3233		39.3162	24.375
43.4555	40.8163		49.1525	24.2857
51.1364	48.1013		41.1347	57.8947
76.4706	57.1429		15.7895	30.7229
37.6405	57.4468		58.5586	32.5967
31.25	35.6164		43.2203	5.73771
28.125	41.4634		56.338	21.9298
38.5185	31.1225		41.5205	28.3784
52.1008	49.6855		48.5437	17.284
42.2222	52.7778		31.8408	13.2353
51.0949	55.2941		41.1347	21.4286
54.5455	43.299		47.2868	6.57895
52.3529	21.9251		18.1159	34.1667
51.8518	30.4348		36.9565	17.0732
44.1176	56.044		39.6552	26.2295
50	33.5078		61.017	29.3333
54.4554	38.2609		39.823	36.5591
45.509	26.3441		32.6087	8.01887

## Sheet: Fig. 5p
Fig. 5p	Relative pSMAD1.5.9 levels in hESC spheroids cultured in YSLC conditioned media
mTeSR Control	YSLC Control	YSLC+LDN
15.5849	8.52277	35.758
10.413	9.8297	36.1395
11.418	10.0644	27.1015
13.1728	6.8604	30.8293
12.2881	8.47426	32.5376
12.5446	15.2158	29.1815
13.7746	7.44158	34.9883
11.6934	7.66634	38.1102
10.9066	9.11089	28.8283
11.6985	20.2148	51.318
11.1989	6.68317	35.0068
20.5618	6.37426	54.4752
14.0697	15.398	40.8393
16.4534	6.79901	29.4043
14.8918	7.08416	24.5356
15.99	13.3277	24.9421
13.2051	6.60198	24.1892
10.0425	6.92277	21.4065
19.849	5.6703	27.3487
11.7152	8.87921	25.1788
23.5224	11	25.365
10.5427	9.10693	31.4169
20.1676	7.42871	31.641
27.3371	12.0723	20.7122
26.0901	13.8822	20.2967
18.7763	16.5416	24.661
19.5686	29.0958	21.3635
17.1498	37.8519	18.3924
17.4326	26.3092	15.2025
21.6128	35.8807	14.8419
12.6981	32.7483	18.3661
12.8562	38.4103	13.95
12.6265	21.9896	18.2338
15.1981	16.7709	25.949
15.1199	15.1542	16.4501
16.528	25.4991	22.2239
10.676	9.05292	28.3112
35.68	11.0658	22.0774
36.7337	8.00882	21.4144
38.5249	9.70081	17.011
47.5298	10.097	31.478
34.8429	8.73067	28.3065
35.5337	12.0095	28.6729
22.8956	8.83311	27.701
27.9239	8.3019	22.7826
29.8984	9.36024	21.8866
21.9314	8.4213	27.5764
20.4221	5.84735	25.4011
19.212	7.71981	24.9447
18.1608	10.7524	35.9081
15.581	9.12619	27.1762
17.4601	10.6011	36.3514
19.9882	8.97965	37.8594
24.8491	5.53867	42.492
24.0811	7.61669	37.8557
19.9707	6.68521	17.3434
42.8467	5.45455	15.5321
33.7771	6.96744	13.5859
46.4097	8.0597	19.2412
33.9612	9.40977	12.4273
41.5815	8.75034	16.6763
49.2106	5.48575	11.0236
43.2026	5.3962	12.7431
36.2766	12.6554	18.61
37.4326	8.44912	19.0433
50.9815	6.88127	22.4467
35.5873	7.96269	18.1484
41.3927	5.96608	23.226
36.3373	8.91723	22.4415
27.7464	6.76798	27.8277
40.4173	6.24898	22.5757
60.2154	8.17436	14.5265
24.5491	12.2022	14.0861
27.0074	7.43962	28.3063
25.3466	12.791	18.3138
16.4094	8.00339	22.7592
19.4351	9.70081	21.0075
16.6394	11.1377	21.4716
18.7841	8.76119	24.277
16.8544	7.26933	25.5122
23.617	13.4525	18.5733
25.1243	9.27273	21.9607
39.314	9.07327	17.9701
28.2792	8.90298	25.6793
25.8392	10.9152	15.8047
40.383	9.8806	11.8359
31.7098	9.14586	20.6987
23.8468	14.1845	14.1965
47.4408	22.1214	17.0586
33.7932	13.1119	15.9145
37.0843	14.098	17.937
16.8294	10.8384	17.1822
26.5247	13.5821	15.442
21.7098	14.7799	18.9631
17.464	9.47979	18.5049
19.3072	11.699	20.5915
14.3136	12.7059	17.9238
11.9273	6.72243	15.3924
17.8273	8.92491	19.9302
21.6909	9.93726	17.2401
10.2055	11.3479	19.0877
18.42	10.5219	19.9342
13.78	13.02	21.9965
9.5569	6.16399	22.7201
8.6948	7.36128	25.3598
15.3308	7.61652	20.826
9.47099	6.51665	17.8071
17.5177	6.01356	20.2331
20.2102	8.34155	21.9734
17.8998	5.61899	16.2213
16.0716	6.88409	21.5586
16.1232	8.61282	20.7006
12.1957	5.51911	18.0651
8.58535	7.2873	23.4018
9.801	7.63995	31.5239
9.86678	15.361	32.5487
14.9267	8.31552	26.1948
12.2989	9.32996	34.6422
13.6286	8.41588	24.4642
19.831	13.1054	32.9095
28.6033	14.8866	28.4682
27.9461	8.87653	34.8688
37.1101	12.5105	37.2644
21.8893	8.50325	15.8685
18.0705	14.3819	15.378
24.1628	7.8852	15.1459
42.2984	9.60144	13.3172
44.7584	16.6982	12.9069
24.4861	14.9069	8.3496
21.7453	10.2881	15.3088
16.1597	13.6159	11.505
17.4327	9.45704	11.3227
11.0151	15.4715	13.2196
12.2635	12.4556	17.1843
9.2761	12.3126	15.382
13.9239	13.8354	8.4201
11.7598	7.9574	12.5278
14.3308	10.6758	10.0216
10.8277	8.75451	7.60825
13.8648	8.85343	12.168
16.0855	12.509	8.26907
13.2138	8.37689	11.1387
16.2572	14.6676	9.77783
12.4359	15.0705	13.8706
10.2527	12.0201	7.85
11.8597	16.7361	8.84484
9.81923	15.4473	9.25773
14.6209	18.1202	22.6169
11.5707	14.5427	21.2645
9.99879	18.0436	19.037
7.87001	14.9207	21.5005
13.9135	6.5816	20.8561
11.5937	17.4305	18.3127
12.2999	14.3821	18.6804
10.8561	14.5688	17.4158
11.7636	13.7005	18.5395
9.62878	12.2646	17.4399
12.7164	18.9335	18.6186
13.7074	10.8227	16.4399
17.8522	12.8979	18.4399
23.2576	9.22498	17.433
22.7261	10.9611	11.3543
14.8066	6.0094	12.6765
19.6719	21.9214	12.6244
15.3412	9.48019	10.6303
16.0187	11.6985	12.5557
9.22299	9.38617	11.8199
9.15374	15.5158	8.46919
12.0512	11.7777	10.032
9.67036	12.4419	9.17891
11.6053	19.3532	8.21564
19.0277	19.8025	8.38863
15.2687	8.15812	19.6747
14.108	9.31146	15.7216
23.2978	12.7369	12.7821
24.9529	7.69033	12.295
14.1205	16.1456	18.8154
9.30194	7.06683	14.6104
14.6953	11.0394	14.2451
17.0263	17.0871	13.4546
11.5434	8.67661	14.5953
13.746	9.22852	9.76324
8.64616	7.43735	20.6952
6.34949	9.44928	9.66112
13.2807	13.1295	11.6732
6.88061	11.2888	8.26551
14.2388	21.4582	16.2088
8.08321	19.3186	12.6104
10.5803	16.5674	13.8858
9.61071	9.79714	14.3638
18.4494	8.83294	24.2353
16.1774	11.1108	19.7711
18.0292	12.4425	28.5708
15.5691	13.3919	25.0859
18.6239	13.0792	10.0116
14.1781	22.5134	11.6394
23.0235	21.2859	15.0481
18.5295	20.7326	9.27489
18.6437	19.4008	10.8855
16.48	14.2996	9.18805
17.2638	16.8285	11.3778
15.5813	11.9631	11.2594
13.9464	14.4675	10.4923
9.09011	13.1191	13.25
11.4641	14.2312	15.3382
15.212	13.3232	16.822
14.583	12.5703	16.187
15.2046	13.1493	15.5041
10.1974	10.564	14.1569
13.7562	11.3535	17.0724
13.0799	9.60933	14.5862
11.936	10.7253	18.4276
10.53	21.2133	18.0561
17.1918	14.1108	19.513
15.0248	22.8915	12.4496
13.0671	16.1989	11.5488
13.1679	13.1658	11.9184
13.3237	20.4032	12.6864
15.1303	24.3941	9.624
11.9089	19.3572	11.3264
24.4826	14.6232	10.6304
11.814	22.0791	17.8385
17.7303	15.5961	15.5495
13.4684	16.156	20.2848
18.5955	20.63	17.5354
16.3485	18.9299	19.5096
9.71611	9.75	32.4613
19.8694	10.0606	20.8393
14.8893	13.016	18.2082
16.357	11.3652	29.0375
16.8219	12.2132	32.6919
12.6544	13.2453	25.647
8.16642	12.323	18.6545
7.77761	12.8907	23.8293
9.28498	26.3604	10.0199
6.75331	18.1991	8.46148
8.40795	20.2635	8.63297
4.9838	16.54	9.32311
7.70692	22.4691	8.10936
6.08395	16.1269	12.9188
7.15832	20.2765	8.92212
13.7685	25.8673	11.7233
10.0935	24.2453	8.03894
12.4837	26.0735	13.594
9.97935	20.8217	9.28583
12.4261	14.5712	9.8053
10.8456	20.1646	9.4855
9.63417	19.4971	11.9329
14.391	22.5778	9.72162
11.3564	18.7365	11.7763
15.522	27.231	25.0244
9.24423	19.3559	21.6235
13.5881	6.66701	28.6002
9.78092	9.33809	23.1569
8.85849	5.9888	20.6575
11.1562	12.1782	16.3976
8.30713	8.63035	16.6554
10.9539	12.1874	21.0822
7.826	6.5275	23.6988
7.39727	10.113	20.0747
10.7128	7.26171	14.2692
7.89308	9.80652	14.5767
29.3345	6.17108	17.9083
38.796	7.05194	21.9842
25.9816	12.2025	22.0263
35.1238	11.4775	14.6098
32.0067	11.79	15.7414
23.2926	8.6075	12.6429
24.5518	17.9337	21.8053
28.888	16.4138	18.1196
30.7868	7.08	22.5737
27.3044	9.015	18.7955
33.092	10.705	19.2399
33.5368	9.245	19.6226
28.1304	6.8675	18.0662
29.0905	16.9187	21.4242
27.0913	13.055	20.6437
29.2048	17.8188	18.6011
32.7653	15.235	20.565
26.5874	11.4537	18.397
27.9407	14.1591	22.6809
24.8602	13.9402	15.1405
28.8602	10.7628	23.3894
24.2659	9.02314	23.2241
20.0276	11.6326	16.51
20.9423	9.64899	16.284
28.5894	11.9932	26.6017
29.8073	9.75892	26.5161
26.3852	11.4455	27.299
13.668	15.378	20.6752
21.1241	12.6191	33.839
27.5251	8.84474	33.8997
17.3153	9.62777	37.4415
16.6709	20.7526	30.7965
18.8483	21.7541	32.5451
12.3823	24.5961	31.5048
19.88	25.0601	28.6583
28.9607	25.3573	39.3196
18.9287	19.4862	36.3503
22.6567	19.5336	29.1814
39.5273	16.9628	29.2418
38.62	14.7992	25.4357
23.186	16.9937	50.4779
23.106	12.7294	34.2668
26.824	12.6414	31.1238
25.31	10.0081	38.5605
14.6747	11.2821	18.469
24.0894	8.48019	20.9438
25.9057	11.777	16.2907
25.8324	8.52384	20.3752
19.8045	9.23841	17.7665
21.0649	8.3902	32.4811
20.6718	18.3143	29.7324
11.3373	23.3123	33.2584
24.2744	13.2814	33.95
26.6879	17.3103	34.2247
23.7479	13.2733	30.5454
24.4134	10.1981	32.0572
23.7605	14.2606	34.4413
28.294	10.0618	26.9775
22.801	10.8811	34.1226
24.4381	11.8858	34.0599
18.1528	7.86165	26.8934
32.492	6.34184	28.2863
19.786	10.1632	29.1739
30.6012	7.29349	23.7129
33.9578	14.8079	25.1424
21.9258	12.3882	26.5792
29.9403	11.2357	27.5953
25.6623	17.7294	25.0394
28.0495	22.6451	18.3455
14.23	14.1248	11.3883
22.6346	22.0921	12.7051
20.3188	12.8096	14.5201
21.7365	17.2594	11.9588
21.0131	10.7685	13.9249
29.8719	21.7008	16.1548
50.4522	18.3187	15.5412
21.3788	13.6506	11.6346
16.8392	15.5146	16.4213
14.8636	14.7273	21.2683
18.3741	22.039	20.3828
20.3485	17.7664	17.8132
27.3531	13.5919	21.0513
19.1527	13.2178	14.3993
19.6865	9.66226	26.7518
17.6259	9.76476	25.3297
30.6037	13.9069	20.0733
44.7774	11.367	18.4734
15.481	6.68729	19.1639
21.3843	10.5905	10.1395
19.4843	13.2423	5.14539
13.6645	10.4738	6.39007
13.6372	6.92773	8.57506
18.0025	5.63769	12.0969
14.6273	11.3165	7.41194
14.1777	10.5531	6.8617
14.7273	9.58904	7.51537
15.3744	5.89986	5.75118
22.8831	8.9589	6.67258
13.8251	11.7468	17.6896
13.5662	10.0463	16.8559
16.9362	8.04771	15.03
12.0222	9.34199	16.0764
17.5614	14.1507	17.5425
10.6058	8.77988	17.5774
21.7294	10.018	12.9014
25.3485	12.9372	15.8733
18.8717	11.5168	14.2505
10.8159	9.30657	12.4545
24.7404	11.2518	15.2128
30.4902	7.9452	14.0242
17.9029	10.5026	12.9043
21.6403	12.112	12.3617
22.5807	9.50402	12.9439
25.0416	9.83042	14.0106
17.5971	7.66226
15.4772	6.91072
22.0522	7.79452	27.6387
17.2879	7.50968	28.0608
16.0245	13.7973	27.3759
16.7806	20.2126	26.4125
14.9935	13.7596	24.6559
11.5995	12.3831	18.2945
16.1966	22.2669	15.4005
8.26672	12.6226	16.543
16.394	17.8053	15.993
11.5334	13.6749	13.828
	11.6819	14.9505
	26.6908	18.6325
10.1256	25.4758	11.736
11.8348	15.0394	14.1245
17.7082	9.73855	12.788
13.087	15.3079	12.5105
10.7884	20.6788	15.6195
15.3208	13.2964	13.819
11.5369	9.9084	10.7745
15.8276	13.0776	11.8495
10.6566	10.4663	14.1845
11.8093	10.9994	14.9555
8.25968	14.6317	16.9733
9.06263	6.56514	14.0367
11.7755	5.17339	15.9927
10.8543	6.91651	18.656
9.5292	6.31376	13.2813
12.7678	6.63028	15.4833
10.962	5.27248	14.368
13.9296	9.78349	16.0267
12.3413	6.6422	19.1533
13.4012	7.1789	15.0933
10.4418	8.25464	13.9553
9.49876	9.17042	12.5147
8.12828	13.5656	18.718
12.3294	11.4576	14.9107
5.9262	7.56432	13.4827
8.84894	12.1373	14.7993
9.22883	15.4423	16.2993
9.61565	8.83355	13.8647
19.8927	12.3402	14.4953
17.12	12.1804	25.0573
12.0787	8.41313	16.4153
9.16533	8.5504	13.6933
9.716	12.1068	17.0787
10.0207	13.057	17.2
11.4416	7.58621	13.7293
10.8994	10.5504	18.3387
12.4169	5.48077	13.2047
13.6982	13.9675	19.596
13.6675	12.6784	19.0867
23.0193	13.9039	20.332
13.9608	17.1247	15.2933
19.9747	10.8156	19.8367
7.85946	6.78382	17.3914
6.17613	8.10544	32.1439
9.98604	7.48409	21.5556
8.82928	8.88793	32.9495
8.41622	8.68501	19.6524
4.81982	7.10809	28.8039
9.11261	7.59682	31.1136
9.71216	12.5749	19.1321
10.9955	13.7658	18.7003
6.22568	12.0377	29.266
12.1565	9.55042	26.7475
8.18606	12.4528	19.1557
10.9559	11.0468	39.3216
11.8777	16.9902	15.2407
9.40039	6.98048	20.0825
10.9106	10.9968	19.6785
9.02433	8.56409	17.0454
13.1446	11.1496	18.6044
14.1644	8.14834	19.6296
9.15976	12.5947	28.5968
9.55818	7.8458	23.6179
8.93425	6.99479	19.5252
8.09993	9.67339	26.388
13.342	11.0534	23.0842
9.47336	9.39753	21.4571
9.95043	20.5224	21.2508
11.9033	8.56994	19.0766
11.3333	9.12752	21.851
10.3792	10.9519	27.0497
10.9604	7.27261	23.037
10.1735	10.6519	34.7955
7.72615	7.40468	23.1179
6.114	8.30059	24.638
7.37794	10.8822	20.6785
6.69021	8.40859	22.5589
9.83798	15.2446	21.4705
8.37595	12.2297	38.4444
9.28481	7.6812	23.339
9.0076	10.9401	28.51
7.88608	9.67859	23.2764
7.82658	11.7482	20.9364
8.26709	17.3656	29.6667
8.71646	12.8764	37.7645
7.12658	11.6174	28.6942
7.68228	16.5452	24.9411
8.04051	22.1885	30.8006
8.73038	25.9393	26.038
9.32152	22.1916	24.5033
7.27848	19.8419	38.3267
7.68101	18.4419	36.9544
8.02279	20.2215	30.5632
7.61519	25.0487	40.1244
7.57595	17.8571	54.8708
20.0145	16.112	40.4824
19.3178	25.2613	40.0048
19.2298	19.8393	25.7911
19.3091	24.5063	40.9421
16.696	26.3084	29.4948
12.848	11.1	31.4653
19.8778	10.3131	51.2108
13.8429	11.9906	51.2944
8.29896	13.5393	18.3532
9.31211	11.3602	28.5288
15.3571	12.4969	20.0086
16.7142	10.2455	27.1843
14.2872	11.5005	20.5297
12.89	16.3711	21.5576
18.3523	23.2141	26.0912
16.1398	14.3418	37.2323
16.5424	14.2561	15.7591
13.0289	14.6622	27.2975
17.4314	21.1221	19.4415
20.5323	12.1618	33.2841
20.2382	23.9405	20.6977
21.3715	16.0664	25.1871
21.7167	16.8439	26.3129
20.8506	18.8323	19.62
18.9421	6.55161	16.8743
22.4307	15.6394	20.332
20.7701	18.1607	20.2716
29.9312	20.5613	17.0307
17.5613	11.9277	16.0835
28.8371	21.5039	18.1123
17.8865	13.8961	12.4827
23.5051	12.3226	18.8551
18.1129	6.44258	16.5317
21.7689	11.369	18.3474
20.6995	8.66549	16.6401
29.1871	8.51237	14.023
26.0278	9.33746	18.9942
20.9903	7.21084	13.5163
24.1889	11.3751	16.4952
19.2075	10.0671	15.1843
16.6754	5.51885	23.096
14.9087	6.14546	18.3925
12.1487	10.1472	16.9386
13.07	6.49705	17.9213
11.0746	12.9099	17.8685
30.6272	6.85807	18.1948
24.9526	13.2981	19.1833
24.8065	15.3778	19.6056
31.8539	14.2112	18.4808
24.3769	8.07483	21.4664
33.525	10.6632	19.4712
24.7537	8.54436	19.6296
22.4817	7.65842	19.7438
30.0068	8.97646	18.2783
40.429	8.98914	15.8052
27.703	12.2879	17.9491
28.1028	17.3645	19.7754
27.3444	8.18165	22.275
29.1067	9.38141	19.4484
34.8517	9.55763	19.5091
30.2705	10.3718	19.405
27.5866	15.7737	18.2608
23.0094	10.2311	20.3176
26.845	8.21474	19.2065
26.6302	13.8609	17.9669
23.6919	11.892	18.1103
20.4195	8.51334	19.8361
27.2094	9.96823	22.7738
30.4013	7.25095	18.5879
30.9557	9.57052	21.4507
33.1409	8.22872	20.1876
31.5081	9.05146	19.643
27.7863	9.6061	24.0496
34.4895	13.7973	22.8976
28.2642	8.32846	22.6674
28.2666	21.0252	23.7975
34.3978	18.2281	20.5382
29.1447	28.9395	15.7943
18.3617	9.82609	15.0927
30.6682	11.2785	11.7817
19.0836	7.04915	13.8738
25.2171	19.1103	20.1429
20.2666	13.8475	14.0616
31.5394	9.19912	12.9737
22.0825	16.4694	32.003
27.6887	8.38941	15.5251
19.6793	17.8557	17.3529
24.5027	25.4959	15.8391
34.1218	26.988	31.0706
24.4225	12.3926	36.2081
29.8446	35.8576	25.6878
20.9092	14.8626	36.3905
21.6058	10.8615	30.0501
22.2553	13.2585	54.8303
24.2161	14.0917	45.2392
49.6511	13.1307	47.9065
35.1542	12.9298	14.25
47.3356	14.2771	18.478
38.1491	15.6839	17.262
33.4529	15.0663	14.8193
36.2236	14.4663	17.074
34.3657	14.3863	13.6527
38.5679	13.7171	17.776
29.8338	13.9678	19.7147
37.6342	10.2751	27.7508
32.0587	9.09756	21.6439
35.6487	6.5922	17.0637
32.9665	8.54049	20.2665
38.0301	7.12585	28.2335
25.5413	7.89073	24.5204
33.1792	6.66537	23.1651
27.1676	10.6963	24.4513
22.1802	5.29374	26.456
18.8249	17.8449	20.3121
27.5707	5.63136	21.4953
24.3943	4.51024	21.1627
27.2539	16.5933	28.8333
15.6066	12.4365	21.4544
30.4123	5.59567	26.0967
24.476	6.03101	30.2411
31.3104	11.2411	23.1505
35.5729	8.24225	27.1492
31.8493	12.7484	25.3454
24.9713	13.1147	28.2091
22.2032	13.529	10.0722
26.5419	11.392	14.124
42.1868	13.5424	12.9122
55.5251	5.58338	13.9302
72.457	6.73435	13.0975
48.1293	11.0462	11.562
33.029	11.8701	22.0205
45.4617	14.6916	10.423
26.3635	13.9912	10.133
33.8495	13.7519	11.4434
20.438	15.8403	11.5181
26.517	11.3079	14.1618
31.089	19.7009	10.941
31.7905	17.6374	12.0818
27.9955	17.9102	12.1986
38.848	9.23903	11.6601
41.7415	22.0959	12.5524
29.4978	9.41661	13.8496
33.4877	12.944	14.1913
20.0327	10.0122	14.0343
18.2256	14.9703	12.873
30.013	16.4929	12.3791
27.3223	20.1533	12.1227
37.923	14.4394	14.6739
28.0818	15.6667	9.41817
23.7691	12.4422	12.3327
23.5055	14.7769	14.0541
24.7571	16.5325	17.4768
7.92345	7.02601	16.2803
22.2241	14.5647	18.2107
18.0004	14.0308	14.643
17.0758	8.20592	15.8254
24.4371	8.14669	17.1282
19.1439	6.94284	15.4451
23.3927	10.1198	14.9991
14.2078	10.3822	18.5284
19.8761	6.57231	22.6676
24.8828	6.96074	16.8816
24.6805	7.11295	17.8845
16.6379	8.73209	19.1278
43.3702	11.5434	19.3229
30.8621	6.46419	19.1345
21.8705	7.15151	19.25
22.2715	8.15083	14.7841
30.4272	8.02479	18.9167
24.4862	7.95248	14.375
20.8501	11.0903	15.9697
38.7591	9.621	14.8277
39.2448	11.8265	15.2339
40.5326	9.89693	24.2388
37.9382	12.2023	21.3983
35.1126	9.50512	23.85
35.2884	11.8912	20.8013
24.0908	16.0928	20.2812
20.0098	5.52881	18.9348
23.4656	9.70422	23.3331
18.5745	9.37004	20.9874
26.2287	10.4008	17.6748
19.9462	7.93534	25.4753
17.9945	11.388	11.0415
25.5564	6.72087	23.52
23.1748	6.79001	20.1759
32.4475	8.76761	9.32923
34.9704	7.2612	16.1344
33.4807	17.2273	21.0174
28.3504	13.2663	27.6646
29.2586	7.11268	15.3056
31.1683	6.30154	8.65231
31.8471	11.5115	20.238
31.6887	7.62292	29.8549
34.3332	9.8822	24.0703
27.9089	15.3828	28.1964
27.9559	13.4053	9.82692
24.6492	14.1216	11.6576
22.2388	12.8963	11.6917
18.5669	8.06466	13.7159
28.7	12.3156	11.1638
39.8424	11.701	9.41749
19.807	11.8444	11.8989
25.7061	12.5106	8.00744
34.7736	7.37469	9.98945
40.2473	10.5589	8.68238
37.0438	6.88027	35.85
28.924	19.8002	35.518
28.5783	9.91625	37.144
23.3922	6.3598	32.366
37.3734	24.4653	31.406
34.164	13.6911	27.258
45.2735	7.54777	24.726
29.7194	16.4156	28.806
33.7082	11.92	28.11
37.7664	7.38648	10.0618
23.6455	8.25186	14.294
26.6745	12.9162	12.602
23.3834	9.14764	11.3503
21.2384	8.48201	13.1431
25.2923	7.70968	13.2783
24.8697	14.6762	12.3948
27.5165	10.6352	13.129
37.3657	14.9051	13.448
30.0664	9.35856	12.1775
35.8974	11.683	13.4441
26.3155	12.1303	18.3503
25.9076	17.7891	7.66927
34.5683	8.27577	8.02893
25.4689	8.13654	12.8726
33.5604	17.8354	7.61142
25.9102	10.1576	8.38233
32.5895	3.6735	8.32682
39.0395	9.23314	7.58249
40.4233	4.90178	7.22127
32.145	12.2234	14.2572
28.4563	13.3767	7.68413
25.7918	8.27307	8.45192
24.1214	15.9924	6.93511
32.7765	8.76686	11.4543
30.0074	15.8716	5.29163
27.0133	9.07933	10.5864
35.5088	15.4879	10.455
32.8374	11.5062	11.871
30.6179	4.60971	7.60281
30.9743	5.94556	10.1251
40.9851	5.24204	18.3229
32.2758	4.38359	10.7639
39.0156	5.93719	7.82252
35.6673	5.83585	18.1259
18.5141	9.1608	15.5012
24.8277	3.66918	14.5067
18.3941	5.91774	10.3558
36.5414	5.65811	7.91009
23.6346	5.48658	11.7373
24.8696	10.9154	11.1126
19.8314	6.6196	10.0719
17.6723	6.31505	12.7224
39.0823	5.72229	13.0884
32.5296	6.29988	12.9898
27.7727	6.48483	15.7905
37.0504	6.47608	12.9257
23.6314	4.36348	13.4722
30.105	8.09802	8.40657
26.6664	6.81797	9.03127
37.9168	6.02275	8.56372
28.4473	5.22287	17.7991
26.3009	13.2248	13.1861
27.6682	9.92052	12.9969
30.6932	7.84951	12.502
36.1136	6.1798	12.283
42.9522	10.4691	10.0602
25.8223	10.2547	17.2282
39.0426	7.98567	13.9135
21.3528	4.70554	17.056
19.3081	5.22606	19.2586
20.225	7.72508	15.5881
43.9127	9.90749	15.4127
29.5368	7.09446	10.1153
42.2518	3.29642	13.7537
32.6456	9.35896	16.2521
18.1814	6.33094	12.0453
24.959	12.5655	8.58754
22.0189	4.9772	5.8002
26.0846	5.61498	6.1088
24.1441	10.0098	8.11968
	8.42997	5.72898
	9.04821	6.00495
13.3329	5.69642	11.4095
23.4504	5.77785	5.17705
15.8321	6.08925	15.8516
15.8839	7.14658	13.4965
13.9923	8.48534	7.38081
14.1993	7.81498	13.4026
11.598	5.39739	6.23343
10.0803	7.88013	12.2957
11.1921	6.71335	6.05044
12.8994	3.643	9.5361
35.0688	5.00456	10.4233
36.0932	5.9342	7.26014
33.0337	10.0476	37.0146
34.9197	6.57003	15.1294
32.6473	8.20065	28.2448
27.6516	3.56026	15.8018
44.4473	3.60782	14.8734
40.8566	10.1733	15.7893
33.6007	11.2209	30.7253
21.7216	4.48274	42.7559
34.4469	7.31792	13.2086
24.8726	4.18176	14.0125
20.8465	7.14006	29.4172
23.3319	6.76743	20.9284
21.0808	9.10578	15.822
23.9447	12.5873	17.7893
22.6209	9.827	19.5814
20.8073	10.7058	15.0035
20.7147	10.2391	21.4652
24.5289	9.47438	13.8088
19.5405	10.3422	26.9451
24.6051	10.2584	16.4729
17.6525	12.7333	15.5807
29.3825	11.2556	12.29
29.4677	11.9295	24.3199
22.9155	11.8386	18.6752
30.4327	10.9565	13.79
26.288	7.13003	16.4242
26.149	10.6667	20.468
19.0268	6.39394	21.605
20.5084	14.4964	14.0445
21.3279	7.17245	16.5967
25.6868	9.93444	21.6892
24.2838	10.6887	28.2343
20.4891	7.01928	27.5904
18.4122	11.6733	20.0341
21.1788	7.61984	25.0848
20.2157	4.96804	24.1627
22.0066	8.82259	19.4743
21.5759	8.59174	17.2559
19.2978	10.092	19.7698
19.6811	7.30413	24.0157
19.524	9.75372	17.3507
16.9126	7.427	19.7574
18.405	6.93829	19.3408
26.3539	10.427	19.6394
24.2535	10.7179	21.8614
24.8442	7.10121	20.9249
21.2043	7.9577	18.6007
27.59	10.3505	21.9554
24.3975	7.70393	16.1543
28.0422	8.86858	20.5091
20.5914	7.79607	17.8894
23.3989	7.40785	15.4794
27.2922	8.48515	15.7624
25.8012	7.34936	14.0495
22.3566	6.07072	15.11
20.6039	13.174	18.7442
25.2216	5.35502	12.4651
31.3241	11.5233	15.9063
25.6676	4.77369	22.4877
26.241	5.13296	21.5827
27.9418	8.81754	14.1138
24.4961	5.15417	22.3966
28.7431	5.08769	20.3897
32.5327	14.3354	21.5644
26.2797	13.2339	27.462
26.4922	9.59846	9.23757
26.3909	15.0785	9.32822
30.3307	23.7154	11.3041
26.6248	7.09077	11.7712
29.7843	23.4369	10.4488
26.0837	37.3062	13.3501
22.0428	9.69538	8.94518
16.4209	25.6554	10.0358
25.6317	20.0877	12.9832
20.7592	14.5185	14.0439
23.7855	18.1287	12.133
31.0819	13.4025	12.4035
28.3445	16.8255	10.8575
47.352	10.8519	15.4642
36.1248	19.2856	14.2076
33.6071	9.32944	10.2281
36.1462	32.6111	19.6571
38.5922	32.0049	19.3005
13.974	18.2047	23.6297
10.3061	22.0234	21.4135
12.6316	12.2651	13.8308
11.6766	9.97174	17.0235
10.7313	18.962	16.1346
13.6403	15.8986	15.4128
11.3505	17.923	20.9275
8.04894	22.0214	17.2926
9.41238	22.4912	14.3383
7.62236	20.5877	21.1509
8.61099	20.5253	14.5206
9.57625	20.5546	15.0379
6.99179	12.577	16.9327
7.90622	28.0897	19.3475
4.8557	10.8504	15.8739
7.68582	10.5258	17.6891
5.31828	16.3913	15.4357
9.09283	7.78145	16.3664
8.62741	13.2458	17.2351
4.96179	12.7913	15.7257
7.59362	11.0632	17.0999
6.40259	11.0783	16.6525
10.1724	12.1565	16.2711
8.288	12.0388	17.7087
7.338	13.2162	16.0901
8.7548	14.2632	37.6144
8.9048	22.0041	29.2911
8.0284	12.0603	36.9711
9.8184	24.091	32.4633
13.0636	20.0586	29.2833
9.1852	13.6626	25.9856
10.0408	12.2783	31.6978
9.1724	18.9398	39.13
8.3868	14.741	28.8867
9.6552	16.9223	28.0656
16.2186	14.5217	38.6767
17.0983	15.2061	24.3733
19.7684	21.8837	33.4856
15.608	12.4281	31.2111
27.4217	13.6004	37.7111
27.0168	11.3282	39.1433
13.1009	11.3023	39.9456
15.6882	9.2182	12.3843
24.8228	10.9107	10.0366
18.2419	9.33861	14.2918
7.17451	5.28717	11.7378
9.93416	8.53307	15.1105
4.97699	17.7304	12.9287
10.4913	6.25438	12.5315
10.3706	12.1854	14.2262
10.4198	14.2267	11.9916
7.83858	17.0339	13.9184
7.64814	9.00848	15.3052
7.28354	8.65517	10.8774
7.76106	26.5998	17.7354
15.9254	11.6235	17.95
20.4122	13.8423	17.8673
16.5084	7.21062	14.2818
15.5887	8.25895	11.2795
21.2468	12.1677	14.5597
17.0536	16.2333	16.8907
12.8187	8.53938	15.8837
15.6437	12.6271	23.6308
18.2984	14.5907	22.6393
17.0899	13.0161	14.961
18.2764	16.707	12.2069
12.9699	5.26611	12.7892
14.6155	12.1891	11.1608
14.4065	5.91527	15.5925
6.69994	19.2297	13.5761
7.32143	8.25716	14.4676
9.31468	8.0716	19.961
8.01209	15.031	16.6659
6.92576	11.3562	11.4293
8.68729	6.30847	18.6714
8.48791		11.993
7.26772		11.6924
7.0689	9.09775	11.9555
13.145	9.6809	11.4504
12.8793	8.83708	10.6565
12.8936	9.3809	13.7564
7.97353	8.38652	11.3185
16.1413	9.63483	13.7713
13.3182	9.29551	20.256
13.1218	9.25618	18.7471
12.9725	8.24494	16.6183
15.1244	9.8191	12.3622
21.5103	10.2533	14.0984
14.46	10.2962	15.2295
14.1673	9.30571	12.8954
13.9182	14.8771	10.2272
14.1423	8.42	12.8181
12.8073	10.6438	14.8657
13.7532	9.66191	13.6667
13.3814	8.04	12.6667
14.9695	8.25453	12.0763
20.2839	7.60326	9.09231
16.3399	8.25815	10.3366
19.641	7.20109	9.384
34.1184	7.87772	8.15631
18.4825	8.54982	11.1495
18.9223	8.37862	9.89231
24.8078	6.80706	7.72246
17.2126	7.82337	9.76554
18.1935	8.97373	10.6646
7.582	5.63225	11.5699
10.0223	8.66214	20.2682
7.16514	12.4732	20.5934
7.66657	8.16914	17.6618
7.994	8.9162	24.6003
8.94971	8.88605	18.1073
7.86771	7.91211	19.064
6.70914	8.60296	13.3616
22.4649	9.66582	22.8849
21.6317	10.2657	16.5182
26.234	9.41645	23.5104
22.3191	8.30982	26.6367
20.4961	8.84033	14.2604
31.7565	9.81783	15.7292
24.3125	8.53137	22.6038
19.9748	6.67893	17.5882
26.8074	9.28386	26.6834
23.4931	7.21549	18.3633
21.7025	9.34444	21.2093
9.83	7.84595	15.4014
23.9817	8.39074	19.2941
8.075	7.45565	21.9161
17.3117	17.5064	12.8045
11.7033	15.072	16.9325
7.73667	16.417	17.8858
12.53	16.3542	21.7509
9.17167	18.827	17.8261
10.0224	18.993	13.199
9.89969	13.3389	15.7301
10.5047	12.8696	19.6548
10.4388	14.7565	13.3806
13.9143	10.8751	13.936
10.8068	9.39114	21.2673
10.3776	9.24723	13.5657
11.2065	13.9619	15.2829
10.2745	11.083	14.9109
10.6758	10.5818	24.5554
10.0848	11.9563	16.1661
7.98913	10.6992	26.4663
14.3615	9.14101	22.8304
11.4245	8.73583	17.6298
14.1227	8.5087	16.9766
13.0955	10.1669	16.8884
11.422	9.23338	21.7881
12.6797	10.1352	21.5735
11.2923	9.54172	17.6358
10.6435	11.2137	18.5856
9.05146	9.41455	11.8737
10.9032	11.9839	11.3394
13.5834	9.1477	9.15526
21.3535	9.54931	9.54128
9.80664	10.5859	10.9732
10.0342	11.9704	10.3091
10.772	7.67954	7.97883
12.216	8.66639	9.8518
12.215	10.5193	7.47565
43.5838	11.2983	10.0212
40.0744	6.96338	10.6507
54.78	7.85	9.58716
39.956	7.49085	10.3705
42.7276	8.64014	11.5632
52.4365	8.99366	9.95131
15.8537	10.4172	7.79265
14.2444	9.61803	6.94619
11.6476	8.15663	7.87139
22.9157	7.05444	6.26115
10.2319	7.88933	8.33596
13.9051	7.44623	6.37533
11.4269	7.71397	5.94882
37.025	8.81169	6.74672
48.125	10.3289	6.63648
19.1914	7.29987	5.40551
25.2483	8.36504	5.71654
43.2233	8.97995	5.57218
32.6086	11.4788	5.75459
44.4491	8.91469	5.78609
36.5491	8.13893	5.85958
30.4578	15.7018	6.08661
54.1957	16.6631	5.92389
44.1155	13.3514	16.4612
30.3681	14.3088	11.5014
21.1405	11.2915	9.99251
34.15	13.3627	9.11717
26.6552	13.7771	16.5184
22.4601	12.2403	10.0422
41.4931	14.1393	11.69
20.3684	13.096	13.7057
24.7544	11.7731	6.96935
20.1135	11.4711	9.0545
20.4364	12.8254	8.73025
19.5829	13.0534	12.3849
	9.88662	20.1206
	10.1806	11.6206
	9.50956	10.7534
	8.41463	13.376
	7.08899	10.8059
	10.2195	11.079
	8.85827	11.0565
	17.9012	9.57425
	19.1724	13.5995
	19.513	15.2493
	11.1204	13.3181
	19.6439	11.7425
	12.3007	10.2636
	13.2175	15.8815
	11.0078	12.8059
	12.7799	10.2418
	14.9861	12.4223
	12.1404	30.1955
	14.8085	11.3535
	10.5797	14.2234
	9.60312	27.4714
	15.1282	9.36147
	14.4393	17.1974
	16.1906	11.922
	19.0035	13.7277
	13.6954	8.97134
	10.1789	12.7468
	10.8035	11.7213
	10.607	11.4841
	8.86954	11.6131
	9.65176	11.2882
	12.0964	14.4873
	12.1514	19.4841
	16.2982	12.699
	11.667	11.2436
	10.1289	11.6465
	8.23337	8.2086
	7.4154	10.9172
	9.04084	11.8185
	8.05017	8.71497
	8.63477	8.32484
	6.3944	8.54618
	6.62544	9.1035
	9.37923	9.13217
	8.10385	7.92197
	11.7141	11.6806
	8.72695	15.9348
	9.05134	10.4972
	8.70478	13.3024
	10.4647	13.3506
	9.10419	12.585
	7.12216	11.5814
	9.15569	10.3732
	9.07545	13.6076
	7.80479	18.3194
	7.34132	13.488
	8.75964	13.0772
	11.9242	17.4065
	11.9473	10.9228
	13.018	10.8683
	12.964	11.6586
	14.6799	16.6643
	13.5039	13.1048
	13.9987	12.6976
	9.18958	19.3235
	8.30878	19.4902
	9.13984	10.7638
	8.76678	13.1881
	7.63679	8.25134
	8.42234	21.6114
	11.0108	24.8806
	8.42421	16.6782
	5.51197	22.8226
	9.26983	23.9162
	8.46598	23.1736
	8.69592	20.285
	9.10605	17.9577
	9.57344	11.0579
	7.76588	14.0121
	8.18135	13.5406
	6.86475	16.8644
	7.67572	17.3023
	5.47848	16.4007
	6.33402	10.9922
	6.51998	12.2237
	7.60195	11.5121
	10.0092	13.9309
	9.4001	11.1883
	10.8648	12.6157
	9.6409	12.6079
	9.03725	17.2522
	8.71188	15.7755
	7.90653	10.5216
	8.19255	14.2071
	7.14055	14.372
	8.15812	17.9169
	7.94378	15.5836
	8.02951	17.5756
	8.13212	16.0876
	7.60014	15.7281
	8.17287	8.48986
	11.2572	7.21779
	10.969	8.71615
	9.45121	7.07063
	12.2348	7.74035
	12.4173	5.90059
	11.411	7.56834
	10.93	5.9431
	12.1986	6.44539
	12.2684	6.41007
	11.4089	13.3062
	14.8736	14.4681
	11.2929	13.5977
	14.3338	13.0439
	14.9547	19.3877
	13.1955	10.2508
	15.4498	11.5893
	4.72395	17.1933
	3.92139	16.3814
	5.89762	16.8537
	4.9287	11.9175
	6.09324	22.9927
	5.57221	12.5611
	5.51188	13.8861
	5.16819	16.2497
	5.18464	11.279
	10.9377	15.4671
	12.4446	16.7179
	12.1315	12.4817
	13.1574	15.3626
	10.1955	8.41902
	15.8374	10.7179
	12.436	18.8255
	12.1393	10.4828
	10.9731	10.7482
	9.52239	9.10554
	9.46468	13.2299
	12.2458	7.45455
	12.8706	8.17659
	9.12836	7.81505
	7.84378	10.8972
	10.1274	14.5164
	8.59104	9.20569
	8.13234	8.91466
	8.40896	8.73742
	12.8955	9.42232
	12.4852	13.8249
	11.5647	8.38512
	12.0328	12.0503
	10.3401	11.0853
	12.9938	14.8359
	10.4087	8.47484
	11.5725	18.0591
	11.6115	8.48578
	11.3869	11.3676
	9.65991	15.4004
	11.0671	13.3654
	8.36818	13.4529
	6.11111	14.7768
	7.11488	17.1116
	7.66667	12.2144
	7.47928	18.44
	5.77966	22.5261
	5.91996	20.3549
	6.21751	22.3414
	9.13793	26.6219
	8.95965	27.4458
	6.74688	14.7573
	9.48276	17.8211
	9.83052	14.558
	8.82025	22.8965
	6.87748	22.9778
	5.81724	14.44
	7.70644	26.5899
	10.3703	18.1644
	9.52178	13.8627
	8.66951	14.0367
	11.4848	20.3453
	5.63258	12.4217
	5.17996	15.5754
	4.85063	21.058
	5.13377	13.3462
	4.72885	16.6983
	5.34253	13.2491
	5.41152	9.63383
	6.18116	16.6933
	4.56089	27.4833
	5.25675	7.48327
	4.71266	15.4758
	10.2416	6.74164
	10.8573	10.9331
	11.7173	7.81413
	9.03918	8.85688
	7.75187	10.9275
	8.98041	8.42007
	8.20149	8.25279
	7.15842	29.4827
	6.16337	14.0149
	7.69719	21.2913
	7.85396	34.4556
	12.0123	29.4342
	11.1923	14.5201
	13.2851	19.873
	9.51192	27.5509
	11.7412	34.7656
	13.5883	36.1914
	11.6524	17.7476
	9.48891	11.8275
	7.36154	13.791
	7.4585	20.0729
	7.21117	11.4586
	9.51192	13.0828
	8.23898	12.575
	11.4207	13.1795
	7.58933	18.8843
	7.6249	9.2251
	8.87548	10.3471
	8.78113	10.9621
	5.79737	15.0175
	8.46558	14.0996
	6.63573	10.7461
	6.27146	10.838
	5.79428	9.3871
	8.01469	13.5989
	8.26829	21.7644
	9.7184	11.8015
	7.5898	15.2798
	6.90909	13.364
	7.33259	10.4818
	5.76275	15.2483
	5.87361	13.1501
	14.0302	17.7328
	15.2839	15.9663
	11.9623	20.0673
	12.1457	11.7111
	12.6935	12.2468
	14.7864	12.6417
	17.0729	11.0302
	17.6658	11.5877
	13.8618	14.6781
	13.3166	17.418
	12.2965	17.8738
	14.1533	18.0498
	13.7085	12.9285
	14.1482	17.0856
	4.24634	12.6094
	5.62716	9.54067
	4.68575	10.8324
	5.32756	16.1725
	5.8775	14.3093
	6.85752	12.0505
	5.18242	8.78401
	10.2269	11.195
	11.1253	12.0252
	10.4117	13.094
	15.0616	15.5694
	10.7803	10.0407
	10.5031	11.5652
	11.0082	11.9004
	10.1448	8.65217
	6.11992	10.8843
	7.97185	13.7574
	9.1439	9.97476
	8.22211	15.3415
	9.63399	13.256
	8.75078	12.7826
	9.76236	13.8212
	8.98669	14.3808
	11.038	16.7188
	9.92395	9.51683
	11.962	10.209
	10.1806	11.9397
	13.2338	13.601
	11.097	10.2265
	14.1981	10.6325
	12.139	14.723
	14.1645	9.20056
	10.7524	17.8703
	10.9824	11.3541
	9.81789	10.0828
	8.14537	14.2041
	10.6709	11.5722
	8.66773	21.6949
	11.4936	14.2693
	6.85294	14.7567
	9.63761	23.2181
	4.90231	13.4856
	5.16597	17.8756
	6.20693	14.2314
	6.18802	17.4702
	5.29622	13.5692
	7.09139	13.6769
	11.4141	13.8201
	7.42969	10.2589
	9.1263	10.1558
	11.7643	11.6943
	10.6432	11.5405
	10.0534	6.49364
	9.36859	20.3846
	10.7602	12.0742
	9.88377	11.5251
	8.69738	26.5819
	9.77068	11.3585
	8.8911	11.602
	7.39162	27.2508
	6.511	14.6776
	8.46073	24.1465
	8.31204	11.5746
	8.33655	17.8602
	6.69478	17.8027
	8.0755	18.7144
	9.09237	26.3378
	8.92771	12.2508
	8.4257	10.0555
	7.46904	16.8856
	7.14728	13.7197
	7.91088	10.1191
	4.99062	10.4428
	8.02158	19.798
	6.29929	10.5431
	4.5488	10.2655
	4.13898	7.23077
	6.17259	9.64615
	4.90562	9.06087
	6.27214	16.3204
	6.61926	10.3064
	7.44732	16.5177
	5.27229	15.6743
	6.64013	11.5505
	6.12102	9.21739
	6.67675	11.5993
	7.54299	8.9806
	8.05733	11.0107
	11.7133	7.55987
	12.684	10.1639
	12.7156	9.86288
	10.9661	18.1859
	10.5711	10.1465
	7.5079	10.5866
	9.26185	8.61672
	11.3499	10.493
	8.28442	11.7819
	10.2754	20.659
	9.00677	14.0015
	9.76975	21.7461
	7.57788	15.1451
	6.12641	13.1574
	8.88598	10.4954
	11.4841	12.3796
	9.28598	11.287
	7.78692	12.9066
	10.2149	16.0293
	8.41869	11.1952
	8.46729	13.8619
	8.91402	13.3997
	8.98505	13.0016
	11.8411	9.14566
	11.8112	15.0155
	8.89394	17.0908
	7.94372	14.6964
	5.8052	11.0548
	5.90693	13.5687
	6.86364	10.5139
	7.17532	9.95008
	8.04978	10.8257
	8.88312
	8.57576
	8.55657
	10.3628
	9.77373
	9.47984
	9.25618
	9.80624
	8.02861
	7.07932
	5.92718
	5.89543
	6.36993
	8.47712
	6.7085
	7.64575
	8.69935
	6.66405
	8.10588
	8.80491
	8.89768
	9.65757
	11.3029
	10.4106
	7.025
	5.8925
	7.23167
	9.44333
	8.38833
	8.88417
	10.5223
	10.4521
	10.2428
	8.14254
	11.3641
	9.86971
	11.0312
	9.46625
	9.03531
	8.92316
	9.82451
	12.3551
	9.64382
	32.1526
	22.9373
	26.0736
	23.2752
	21.5175
	19.4552
	13.5856
	15.3113
	11.4377
	23.8755
	13.4805
	15.0759
	8.92023
	13.5876
	12.393
	9.6965
	9.98054
	14.7733
	13.2035
	10.7166
	12.7238
	11.5044
	16.8619
	9.76454
	18.7369
	12.3692
	14.4637
	7.37159
	9.63688
	8.98965
	7.68109
	9.64628
	9.73189
	9.66228
	11.1944
	12.3973
	10.593
	12.9405
	10.407
	9.38396
	9.97448
	8.54556
	10.0389
	12.1956
	8.71567
	10.2467
	9.18104
	9.7254
	9.76428
	9.65371
	8.875
	8.9391
	8.61458
	8.74199
	8.28766
	8.76202
	6.44544
	8.12983
	6.86326
	8.36879
	5.8826
	6.53522
	6.69544
	6.1761
	7.0884
	5.89296
	6.41782
	6.41713
	6.54558
	7.74309
	7.04489
	5.2424
	6.01243
	6.4489
	6.0221
	4.67366
	6.17457
	6.23335
	5.25195
	6.08578
	7.26335
	4.43851
	7.08398
	6.33413
	5.40792
	5.78344
	6.35453
	7.79664
	4.86863
	5.9802
	5.82303
	5.32573
	6.27654
	8.18476
	6.87942
	7.60348
	5.14037
	8.74505
	4.21296
	6.90042
	5.67906
	6.12058
	8.59056
	8.32017
	9.61116
	7.79056
	8.63605
	6.71502
	7.68498
	10.3347
	9.73525
	11.1756
	10.7037
	11.9067
	15.3073
	11.8285
	13.0425
	10.0483
	9.63207
	12.2271
	8.06886
	7.97122
	8.62796
	7.48715
	6.26002
	7.49846
	7.03494
	7.81912
	6.41007
	8.31136
	9.59253
	11.8253
	11.6688
	15.6299
	10.1358
	11.2629
	7.66561
	9.91183
	7.73392
	5.71724
	7.11914
	8.42415
	9.55961
	8.70884
	7.6691
	8.24817
	10.9221
	8.15004
	7.84104
	8.75831
	11.4706
	13.0267
	12.6586
	13.0018
	17.705
	9.44028
	12.7513
	13.7959
	10.6034
	10.4572
	13.9536
	5.21301
	5.20894
	5.55528
	4.69268
	4.89756
	4.61463
	5.59593
	4.60407
	5.35122
	14.6593
	9.96405
	14.9681
	12.3954
	12.9036
	11.2361
	6.87691
	10.573
	11.7487
	10.6095
	10.7275
	8.47793
	12.0306
	8.00246
	8.00295
	9.24385
	9.58751
	7.93756
	8.1352
	9.38201
	7.56941
	9.94657
	8.06076
	8.94814
	6.54269
	7.68937
	7.46255
	7.49497
	8.81767
	7.05313
	7.79642
	8.08557
	8.12081
	8.21029
	5.14653
	6.49441
	7.29027
	6.533
	6.27908
	7.14038
	5.26678
	8.13442
	8.30965
	8.01056
	8.41191
	8.17139
	8.64352
	6.59197
	9.15844
	7.40315
	9.6267
	10.1677
	10.1843
	10.7852
	12.362
	10.6848
	13.8452
	12.4526
	11.7634
	8.97998
	8.54478
	5.07165
	6.1686
	4.54373
	4.92518
	8.08746
	6.52055
	6.6301
	6.22704
	6.93537
	6.60714
	5.875
	8.52041
	7.53316
	8.17002
	6.1558
	5.1728
	6.12526
	5.42019
	5.68772
	5.86711
	6.0805
	5.62144
	6.24323
	3.87168
	5.85151
	4.77543
	6.04216
	6.98625
	4.92392
	5.21265
	6.16315
	5.67461
	6.66636
	6.85694
	8.78754
	11.0368
	9.66761
	8.29839
	9.13173
	6.28754
	9.88857
	6.42587
	7.88716
	7.94665
	6.99858
	7.74693
	7.2644
	4.90604
	7.75307
	5.54721
	4.25322
	4.34764
	5.78884
	4.77339
	4.66438
	4.23391
	4.80386
	4.68455
	8.00129
	5.47854
	4.98154
	6.09227
	5.31116
	4.42103
	5.89871
	15.0123
	13.0823
	14.5412
	13.6007
	16.7828
	17.8564
	7.98131
	7.92236
	12.3307
	7.88641
	9.37527
	19.0597
	15.3436
	12.6226
	12.363
	5.30508
	6.22689
	5.22872
	6.52174
	7.57472
	5.66642
	4.77238
	5.2521
	8.59043
	5.47424
	8.64267
	5.2521
	6.49689
	6.43332
	6.75375
	11.7651
	6.5327
	5.56485
	10.9569
	7.15564
	10.7084
	4.6182
	4.91633
	4.82061
	14.2021
	13.7985
	11.3475
	11.7541
	13.4557
	11.8073
	11.2955
	14.5036
	10.8712
	9.34043
	10.3115
	13.0053
	13.2869
	11.6501
	13.9365
	9.86347
	11.3269
	12.3979
	11.9419
	9.4816
	10.5438
	10.2695
	9.91482
	9.15753
	8.76429
	13.6206
	10.9848
	12.9417
	12.8995
	12.4744
	11.5982
