# Supplementary material for: Distinct pathways drive anterior hypoblast specification in the implanting human embryo
Source: Nat Cell Biol. 2024 Mar 5;26(3):353–65. doi: 10.1038/s41556-024-01367-1 (PMC10940163; doi:10.1038/s41556-024-01367-1)
Supplement: Supplementary file 11 — Statistical source data. [file 41556_2024_1367_MOESM11_ESM.xlsx]

## Sheet: Extended Data Fig. 6b
Extended Data Fig. 6	SMAD2.3 in hESC
mTeSR	50ng/ml	50ng/ml + A83-01
0.915229	1.81923	1.23882
0.89573	1.94248	1.00006
0.990926	2.44447	1.73829
0.9848	1.91687	1.24881
1.00771	2.01733	1.38274
0.947593	1.40692	1.61311
1.03403	2.41579	1.23882
0.97313	2.07856	1.17134
0.859407	1.39356	1.67443
0.861965	2.41481	1.37055
1.16266	1.37313	1.497
0.978819	1.35689	1.62262
1.07935	1.85133	1.4236
0.85367	1.35397	1.53594
1.11119	1.95463	1.31567
0.891882	1.80875	1.35496
0.861945	2.31524	1.13594
1.05214	1.21374	1.49837
1.03726	1.95294	1.2317
1.06191	1.9015	1.05464
1.01866	1.67642	1.13182
0.992551	1.32604	1.27764
0.97853	1.75726	1.12438
0.946888	1.48287	1.57335
0.925359	2.1082	1.13049
1.08852	2.3182	1.32637
0.913737	1.33045	1.06922
1.00491	1.67333	1.18618
1.06072	1.48513	0.847195
1.06407	1.52834	1.23514
1.02745	1.59809	2.12044
0.921741	1.50603	1.23093
1.04167	2.21804	1.76034
0.977529	1.35369	1.32706
1.07154	1.46342	1.0103
0.915086	1.80499	1.5052
0.987996	1.29598	1.03095
1.0033	0.405664	1.23359
1.08301	1.78844	1.32123
1.20042	2.42116	1.42189
0.894083	1.96711	1.04043
1.25538	1.8012	1.15648
1.24831	1.63648	1.4403
1.03555	1.83737	1.13635
0.966332	2.20793	1.23909
0.982066	1.77971	1.15663
0.983527	1.4528	1.08357
0.978903	1.78281	1.38484
0.86767	1.9928	1.18258
1.185	2.46055	1.1456
0.964458	1.57061	1.33056
0.715045	1.91769	1.08498
0.980892	1.80038	1.13313
1.07034	1.7951	1.68509
0.861691	1.46312	1.15491
1.03624	1.78678	1.2669
1.00786	1.40798	0.97926
1.12093	1.28172	1.42504
1.2463	1.22668	1.12877
1.14992	1.79502	1.18472
0.865575	1.13627	1.15629
0.945192	1.77284	1.29403
1.05009	1.58444	1.35726
0.977415	2.23556	1.0567
0.942867	2.08214	1.29071
0.970985	1.30661	1.20642
0.948139	1.04821	1.29279
0.943074	2.09609	1.15887
0.865488	1.78093	1.26968
1.12494	1.90824	1.33832
1.10315	1.58159	1.65046
0.933221	1.50698	1.10824
0.850356	1.9874	0.934638
0.913717	1.64228	1.19111
0.991564	0.379337	1.09541
1.01026	1.76412	1.0284
0.892373	1.76517	1.65942
0.889742	1.54934	1.09608
0.987385	1.88469	0.950705
0.833505	1.28088	1.24514
0.90767	1.99671	1.4832
0.688901	2.21054	0.935034
0.791722	1.76375	1.24294
0.907209	1.77892	1.3539
1.0173	2.18198	1.46378
0.908754	1.18223	1.16356
0.934977	1.14411	1.30935
0.926366	1.53817	1.164
0.86553	2.45497	1.34603
0.767328	2.19632	1.36047
0.825599	1.01533	1.25588
0.70838	1.4261	1.03398
0.923469	1.47974	0.889014
1.11471	1.79683	1.07082
0.98134	1.43197	1.70315
0.873058	1.82632	1.14993
0.759951	2.12444	1.15172
0.950266	1.9624	0.980715
0.953081	1.54825	1.32151
1.02726	1.03575	1.12762
1.02943	1.442	1.41601
1.05019	2.07139	1.21644
0.925236	2.15458	1.69403
0.972444	1.42245	1.43593
0.876131	1.78056	0.724892
0.861754	1.53657	1.23664
0.760722	1.5518	0.904622
0.937459	0.767878	1.2528
1.15032	1.95787	0.999704
1.09563	1.30337	1.0636
0.842646	1.41308	0.949842
0.756491	1.05469	1.09358
0.669806	1.82305	1.09146
0.678886	1.058	0.91339
0.974191	1.84472	0.95623
0.944798	1.86662	0.887312
0.943206	1.69576	0.985209
0.873541	1.82501	1.46696
1.33593	1.45305	1.11973
1.10342	1.42472	0.859633
0.841586	1.87091	1.18048
0.993053	1.62363	0.81316
0.91489	1.45414	1.37898
0.764877	1.37334	0.994683
1.02329	1.01398	0.966657
0.850858	1.61948	1.04466
1.11396	2.05675	1.04989
0.88953	1.19852	1.4756
0.87518	1.3944	1.13669
0.837975	1.44735	1.01352
0.802531	1.27493	1.28245
0.809989	1.30187	1.19572
0.676129	1.44811	1.20266
0.846137	1.33057	1.18383
0.712615	1.50499	1.23996
0.832922	0.98352	1.12763
0.928291	1.37266	1.00885
0.956935	2.28123	1.94067
0.834294	1.65633	1.26411
0.736147	1.28734	1.5674
0.96303	1.88401	1.10237
1.05568	1.2411	1.46263
0.687066	0.930459	0.945819
0.752158	1.2448	0.808398
0.914747	1.2333	1.27491
1.00296	0.920594	1.1659
0.774142	1.60918	1.19178
0.655709	1.28251	0.982752
1.04696	1.34031	0.981192
0.927199	1.58841	1.03996
0.891961	1.28577	0.988339
0.772761	1.84493	0.761693
0.812568	1.1266	1.33788
0.864759	1.20493	1.26164
0.596058	1.04044	0.832749
1.15214	1.22023	1.19511
0.862212	1.00119	1.18333
0.684912	1.7247	1.1019
0.729659	1.16815	1.19409
0.703845	0.988865	0.926623
0.803179	1.76538	1.37182
0.857154	1.25618	0.885076
0.997357	1.46646	0.830389
0.887654	0.706242	1.37286
0.80866	1.09655	1.08655
1.09448	1.13105	1.18782
0.937808	1.11052	1.09922
0.847943	1.46648	0.888649
0.642778	1.19852	0.737435
0.641805	1.26117	0.983471
0.674886	0.964829	0.865878
0.718594	0.981838	1.00909
0.750828	1.40487	0.860441
0.940067	1.62391	1.54406
0.625747	1.03066	1.13307
1.10126	1.96478	1.48618
0.785369	1.33836	1.21395
0.749313	0.993142	0.994652
0.826097	1.67391	1.02881
0.608122	0.872256	1.32117
0.806618	1.63379	1.42095
0.681901	1.17404	1.15988
0.709284	1.19186	0.896397
0.603745	1.0926	1.21238
0.65588	1.00433	0.979716
0.771549	1.26898	1.01202
0.834574	2.22504	0.873494
0.937353	1.14106	1.56427
0.65922	1.50011	1.60938
0.645452	0.867118	0.840877
0.776272	1.38351	1.14115
1.02286	0.953317	1.03674
0.614677	0.896172	0.767708
0.91875	0.924985	1.1196
0.930858	0.838314	1.17603
0.923731	1.06132	1.02564
0.744148	0.543911	1.05069
0.822146	1.31059	0.963997
1.10853	1.37621	0.965413
0.856073	0.669774	1.04911
0.667545	1.52425	0.999956
0.603848	0.900716	0.887703
0.874647	1.22923	0.875753
0.744851	0.824632	1.14698
0.647674	0.948622	1.76451
0.821906	1.55681	0.90648
0.96276	0.808833	0.862082
0.826966	1.24556	0.908834
0.638538	1.55932	1.52517
0.922122	1.57251	0.845935
0.909577	0.995923	0.92826
0.651211	0.873474	0.754347
0.872331	1.40105	0.880416
1.17649	0.814615	0.675055
0.63118	2.08922	0.993471
0.711442	0.518118	2.08379
0.797436	0.924183	0.876689
0.819515	1.00279	1.23361
0.715735	0.938073	0.869896
0.992409	1.31503	0.850231
0.610692	0.715171	1.14159
0.613779	1.45542	0.804111
0.757599	1.19923	0.991523
0.789609	0.814842	0.880248
0.752761	1.73172	0.767983
0.8617	0.919191	0.770284
0.626848	1.10189	0.672963
0.67292	1.40583	1.19913
0.812833	1.03012	1.15699
1.09402	0.903458	0.908528
0.885645	1.35012	0.968784
0.73332	1.73495	0.602017
0.697146	0.988055	0.932886
0.749066	1.10843	0.907245
0.803157	1.31003	0.889102
0.678063	1.70193	0.854158
0.793008	0.791117	0.865613
0.633679	1.07633	0.991477
0.979995	0.839558	1.04436
0.79844	1.27593	0.860523
0.930627	1.47559	1.3228
0.838696	1.6113	0.913518
0.8801	1.19344	1.04812
0.977334	1.45136	1.05046
0.684649	0.846664	0.702758
0.698386	1.10095	0.893816
1.13174	0.899203	0.906851
0.685039	1.40907	1.06228
0.629094	1.05098	0.647496
0.8702	1.55817	0.828803
0.808138	1.32941	0.915665
0.600528	1.27115	0.768396
0.882873	1.01286	0.910356
0.631762	1.19213	0.945638
0.77065	1.28627	0.652366
0.708817	0.623815	0.998789
0.927308	1.12304	0.889839
0.846303	1.79146	0.914445
0.691993	0.831863	0.786313
1.00248	1.00996	0.885712
0.688088	0.817949	0.915554
0.77676	1.80933	0.801279
1.01021	0.968251	0.740239
0.696898	1.38088	0.99342
0.762848	0.910917	1.13647
0.873482	1.09442	1.16844
0.798191	0.752468	0.752287
1.11969	0.577028	0.688847
0.697726	1.36114	0.6321
0.880129	0.745094	0.649552
0.597112	1.43231	0.932644
0.632611	1.52536	0.726322
0.564018	1.34832	0.833608
0.631261	1.04269	0.75102
0.722646	1.1286	0.933843
0.693579	0.746098	0.679075
0.569133	1.23042	0.971912
0.930037	0.825805	1.09857
0.799631	1.33117	1.06948
0.616068	0.925037	0.81724
0.839812	1.23408	0.706295
0.628257	1.23871	0.767497
0.790085	0.736572	0.88234
0.6209	1.09651	0.748931
0.872223	1.04371	0.877427
0.605517	0.701947	0.628619
0.746873	0.94919	0.911466
0.644963	0.950911	1.08982
0.780152	1.02068	0.683226
0.619611	1.32963	0.790705
0.791478	1.10312	0.870944
1.05011	0.836375	0.636417
0.861524	1.61073	0.783275
0.782011	1.03739	0.639322
0.622247	1.10863	1.12085
0.921953	0.88665	1.09421
0.620204	1.39679	0.696725
0.73193	0.843661	0.787807
0.811706	0.976983	0.845192
0.811568	1.33542	0.863644
0.711751	0.664593	0.81663
0.80322	1.49131	1.07945
0.655554	1.10545	0.960081
0.741189	0.752756	0.822384
0.804506	0.715152	0.775817
0.80885	1.27901	0.844091
0.698717	1.07994	0.838743
0.931486	1.06255	0.865288
1.26039	1.00653	0.925521
0.817761	0.960397	0.876423
0.799204	1.49615	1.08075
0.870826	0.79392	0.591197
0.676859	0.911285	1.00762
0.905831	0.833882	0.751932
1.11092	1.48624	1.11539
0.741054	1.05261	0.530423
0.807688	0.706513	0.718525
0.782564	0.972581	0.666889
0.853897	0.757166	1.05377
0.694659	1.06593	0.921917
0.836842	0.636342	0.592044
0.76533	1.09434	0.898199
0.676151	0.944704	0.631588
0.874444	0.98626	0.706265
0.791706	1.22099	0.802893
0.758949	1.23369	1.12774
1.04561	1.15023	0.554474
0.575649	1.05312	0.916646
0.816082	0.64868	0.525508
0.790666	0.967411	0.833998
0.858334	0.876185	0.981649
0.703843	1.12454	0.75131
0.789801	1.76606	0.727584
0.798532	1.12062	0.855472
0.81767	1.17267	0.380861
0.988887	0.60489	0.650728
0.841239	0.858497	0.869889
0.639819	0.69401	1.11107
0.618646	0.782344	0.644207
0.721641	1.20023	0.537389
0.821708	1.07876	0.712226
0.943575	0.789465	1.00789
0.784163	0.939449	1.03929
0.703772	0.681424	0.951693
0.624205	0.830573	0.877732
0.814476	0.586513	0.966195
0.780994	0.659368	0.908734
0.944568	0.805001	0.863588
0.968483	0.726384	0.957467
0.741706	0.899414	0.824364
0.691577	0.639935	0.767582
0.973539	1.19298	1.03519
0.916732	0.943217	0.883211
0.678055	0.718132	0.858542
0.628359	0.458664	0.697936
0.848457	0.814082	0.871225
0.971848	0.847402	0.994048
0.878417	0.884572	1.00926
0.790235	0.725975	0.66178
0.882327	0.661195	1.15509
0.905195	0.759477	0.907085
0.614098	0.904697	0.667682
0.985629	0.895692	0.949992
0.7722	0.764088	0.958918
0.629082	1.44359	0.766667
0.878729	0.878955	0.532409
0.833737	0.729213	0.676543
0.831138	0.854769	0.760523
0.691279	1.06969	0.879275
0.68011	0.69849	0.856067
0.698826	0.893554	0.67699
1.09771	0.759925	0.645541
0.739548	0.650125	0.878179
0.655814	0.951937	0.897486
0.687401	1.01695	0.844221
0.835861	0.807708	1.05306
0.779239	0.885311	0.815172
1.00268	0.637677	0.974573
0.815673	1.13323	0.759198
0.909979	0.707436	0.65806
0.644688	0.562395	0.721176
0.630057	1.14552	0.616724
0.611345	0.93268	0.828867
0.882857	0.691678	0.891799
0.904449	0.840954	0.821535
0.623946	0.918013	1.00781
0.775562	0.662125	0.714853
0.560051	0.87291	1.02262
1.17756	0.895403	0.851777
0.666348	0.882135	0.771616
0.736058	1.33384	0.561336
0.684907	0.807858	0.620031
0.665065	0.692173	0.658777
0.778927	1.15809	0.731408
0.728852	0.918913	0.602598
0.575257	0.828605	0.772081
0.940153	0.775103	0.86959
0.657584	0.770269	0.753181
0.618454	0.657243	1.06249
0.611396	0.884485	0.822606
0.897076	0.868614	1.30353
0.612823	0.725324	0.700924
0.584327	0.594211	0.419815
0.636496	1.36959	0.495852
0.809194	1.30088	0.805167
0.825922	0.932682	1.19315
0.980434	1.15108	1.003
0.703331	0.913982	0.919919
0.717345	0.751599	1.03099
1.00877	0.691588	0.719115
0.606585	0.685808	0.92374
0.794956	1.37705	0.868874
0.797503	1.68678	0.729484
0.550312	0.742606	0.852542
0.674213	1.79501	0.911917
0.989041	1.12639	0.618791
0.598407	0.648218	0.923749
0.81026	0.73368	1.08532
0.763642	0.860005	1.03583
0.790086	0.828957	0.883411
0.544756	0.914242	0.806861
0.819952	0.906944	0.866741
0.944442	0.92896	0.955464
0.532615	1.06988	0.753432
0.832716	1.12785	1.24318
0.666623	0.998643	0.828193
0.665917	0.788999	1.03561
0.911347	0.866548	0.870339
0.792645	1.06989	0.968979
1.01497	0.869966	1.07491
0.506237	0.934856	0.96346
0.584612	1.06143	0.799165
0.62646	0.750704	0.686791
0.842658	1.15458	0.88974
0.719	0.613694	1.07337
0.712469	0.896597	0.833449
0.698142	0.89578	0.426028
1.03516	1.16889	0.881742
0.632399	1.64138	0.779457
0.627832	1.19087	0.830218
0.88143	1.7183	0.807349
1.0205	1.05241	0.899021
1.00241	1.17877	0.949225
0.730043	1.18882	0.688381
0.647604	0.833508	0.886945
0.976879	0.845258	1.11775
0.658831	1.03973	0.820741
0.612528	1.44841	0.884809
0.80567	1.30981	1.00119
0.819879	1.25283	0.761793
0.807483	1.31041	0.836648
0.634621	0.811503	0.821805
0.878486	1.13536	0.836098
0.56779	1.24858	0.674845
0.62628	2.14749	0.765329
0.769536	1.19797	0.864977
1.15438	1.16395	0.668607
0.701369	1.03796	0.474657
0.579722	1.01935	0.816114
0.781363	0.950518	1.08953
0.787366	0.936509	0.783552
0.882131	1.07869	1.29368
0.633506	1.21541	0.626537
0.824546	1.1161	0.806677
0.91275	1.46803	0.525808
0.819425	1.05507	0.872643
1.14645	1.26836	0.674688
0.83097	1.26204	0.803887
0.983852	1.41716	0.862274
0.736188	0.981439	1.00984
0.551796	1.06651	0.73736
0.848777	1.1346	0.94539
0.794279	0.903937	0.923851
0.684194	1.18601	1.01198
0.72753	1.79427	0.521175
0.751399	0.861627	0.616247
0.881197	1.09319	0.600008
0.719042	1.14983	0.845219
1.07321	1.53277	0.744922
0.721537	1.02027	0.530026
1.00835	0.971981	0.81252
0.946518	1.04763	0.731613
0.590024	1.94062	0.814262
0.909759	1.81177	0.911757
0.971655	0.94192	0.803823
0.770959	1.50556	0.815716
0.54385	1.62103	0.703401
0.788569	0.876088	0.873216
0.777978	1.3195	0.923238
0.507788	1.274	0.769963
0.665378	1.21951	1.02074
0.769253	1.39732	1.04006
0.735124	1.52484	1.09889
0.916497	1.09352	1.13982
0.67788	1.11141	1.12574
0.665582	1.08131	0.988214
0.840894	0.945498	1.07884
1.01998	1.27252	0.855965
0.709374	1.38127	0.945845
0.791556	0.828209	0.919608
0.69147	0.906789	1.0639
0.718208	1.37201	1.10577
0.994786	1.89916	1.27641
0.698391	1.00287	1.11143
0.783016	1.00824	1.08322
1.15587	1.6354	1.08465
0.728805	1.752	0.978095
0.969244	1.29828	0.730045
0.670579	1.20782	1.34366
0.619668	0.826274	1.1678
0.601035	1.31384	1.08621
0.702065	0.833374	0.893716
1.08892	1.63457	1.0363
0.712455	1.10985	0.956225
1.01661	1.36967	1.40863
0.93388	1.36543	0.972025
0.812464	0.733455	1.26594
0.550077	0.780408	0.93975
0.658774	1.28924	0.81196
0.635422	1.20832	1.11508
0.837475	0.843503	1.20925
0.604218	1.11928	1.14525
0.946064	1.13349	0.979318
0.814647	1.46352	0.950676
0.671779	0.892121	0.804578
0.980169	0.623563	1.10499
1.09997	1.13549	0.853612
1.43522	1.10315	0.99841
0.952276	0.882166	1.30578
0.919224	0.944422	1.19629
1.01779	1.30929	0.969173
0.977157	0.87559	0.730174
1.00645	0.90319	1.09234
1.00434	1.14891	1.22452
1.02027	1.27534	0.936505
1.00832	0.91217	1.03327
1.01399	0.991744	1.0583
1.03973	1.18098	0.878551
1.24973	0.885105	0.928189
0.83179	1.03205	1.07712
0.988693	1.15757	0.881413
0.995571	1.35176	0.913866
0.793128	1.38229	1.8386
0.914137	1.01364	1.14099
1.07651	0.951599	1.07839
0.940768	1.13795	1.14152
0.930345	0.833692	0.858972
1.06304	0.994334	0.84945
1.14961	1.10135	1.20432
0.959636	1.33304	1.24196
1.08447	0.991109	0.839955
0.998786	1.12062	1.39794
0.923711	1.0071	0.845041
1.17001	1.0041	1.04242
0.873343	1.13362	0.93115
0.849759	0.77739	0.899414
1.04294	0.691589	1.08612
0.851219	1.03063	0.994615
0.864941	0.882189	0.80585
0.867657	0.957269	0.818485
1.01263	1.2562	1.02327
1.27683	1.26458	0.835209
1.00472	0.850377	0.932467
0.92673	0.957315	1.41002
0.871163	1.14339	0.877636
1.06608	0.721462	1.04171
1.53924	1.03375	1.13547
1.13514	0.897471	0.896214
1.03336	0.745316	0.901809
1.04831	1.03441	1.00334
0.890027	1.12157	0.81606
0.916654	1.24675	0.996391
0.915126	1.11496	0.974611
0.932382	0.969548	1.12707
0.820651	0.822891	1.13452
1.28503	1.02398	1.06053
0.899545	1.24466	0.903851
0.849439	0.847509	1.18059
1.17967	1.02096	1.01164
1.12208	0.944114	0.610886
0.90289	0.975584	0.850494
0.911375	0.887855	0.944596
0.937551	0.972083	1.3561
1.03211	1.18032	1.03472
0.952576	1.0708	1.02821
0.925156	0.889299	0.906955
1.00079	0.88036	1.78501
1.03181	0.873672	0.982045
1.21187	0.779077	0.822209
1.00482	0.918637	1.03081
1.17502	0.8796	0.775704
0.739237	1.0275	0.955042
0.951196	0.878512	0.848781
0.974696	1.05212	1.08736
0.783304	0.859167	0.969389
0.971627	0.9994	0.687727
0.832423	1.15918	1.00411
1.08929	0.664931	1.1595
0.989285	0.782401	0.858132
1.20533	0.96816	0.701569
0.870733	1.14438	0.674021
0.919314	0.779187	1.10504
1.20233	1.00352	0.635542
0.904167	0.695952	0.960629
0.40497	1.24176	1.01735
1.03718	0.905022	0.868539
1.04919	0.929939	0.934487
0.967607	1.00497	1.01693
0.995373	0.88844	0.89028
1.01163	1.19343	0.781247
0.980016	0.796701	0.799215
0.8947	0.930207	0.965288
0.927953	1.04341	0.716786
0.900682	0.657444	0.900957
0.821568	0.686158	0.963968
1.03769	1.03264	0.855053
0.809257	1.2868	0.746224
1.07366	0.835511	0.921393
1.10356	0.965158	0.73568
0.9775	0.781089	0.89793
1.12863	0.886475	1.17426
0.836541	0.881592	0.806605
1.0446	1.04565	0.961214
1.15971	0.903976	1.10342
1.01956	0.944552	0.935806
1.021	1.24814	0.974073
0.8389	0.257877	1.0663
0.863797	0.945214	0.77611
0.546509	0.954334	0.699737
0.983092	0.896493	1.07303
0.890278	1.31237	1.05759
0.769241	0.921601	0.90096
0.852186	1.21935	0.708958
1.24717	0.858251	1.06345
1.18966	0.844902	0.843939
0.64173	0.559073	0.960938
0.789175	1.07708	1.0451
0.967913	0.751972	0.808336
0.825604	1.00241	1.10754
1.05194	0.781106	1.10964
0.888678	1.37882	0.910134
1.01396	0.984618	0.893305
0.891074	1.22524	0.687221
0.981433	0.898362	1.78481
0.71018	0.917479	0.7909
0.932971	0.925205	0.919439
0.803767	1.02439	1.03176
0.836207	0.516814	1.03682
0.761871	0.885163	1.04906
0.995725	1.02229	0.679767
0.82915	1.09174	0.996099
0.747257	0.728434	1.08121
1.13938	1.10874	0.807245
0.912788	0.945108	0.944782
1.10816	1.01805	0.73195
0.94319	0.959312	0.834698
0.801571	0.773092	0.773932
0.985875	0.985501	0.755955
0.673947	0.964349	0.588569
0.816612	1.13463	0.816472
0.791243	1.06148	0.657931
0.918858	0.832463	0.943672
0.943494	1.01416	0.998747
0.844037	1.20474	0.598357
0.94247	0.89409	0.934662
0.855361	0.718291	0.943126
1.16389	1.4042	1.06706
0.787717	1.03624	0.94244
1.35845	1.01272	0.834987
1.01131	0.813593	0.884434
1.16112	1.05129	0.818406
0.751435	1.34931	0.990964
0.873314	0.861487	1.00464
0.975886	0.724971	0.877615
1.03182	0.980894	0.771741
0.989689	1.00156	0.784902
1.0028	1.16048	0.875108
0.873872	0.724697	1.01749
0.953133	0.867383	0.774066
0.886889	1.06553	0.758465
0.738568	1.09477	0.86581
1.53634	0.990007	0.859869
1.04432	0.744869	0.694777
1.25705	1.4501	0.639783
1.04218	1.08287	1.06515
0.886468	0.883505	0.938229
1.12865	1.05029	0.863548
0.906303	1.57296	0.955536
1.05326	1.00668	1.09766
0.92361	1.18794	1.11135
1.00374	0.480709	0.698721
1.06895	1.03698	1.04205
1.01234	0.73429	0.727964
0.891898	1.10035	0.722576
1.22788	0.883069	0.9415
0.801388	1.03551	0.980535
0.800828	0.723352	0.65089
0.795926	0.802187	0.81607
0.937759	1.44898	0.902196
0.907093	0.916702	0.785849
1.00914	0.92	0.756182
0.749882	0.74459	0.975039
0.777635	0.964543	0.943373
0.935468	0.655246	0.60499
0.898724	0.706231	0.816802
0.71854	0.827471	0.686898
0.68572	0.819045	0.691431
0.706744	1.14613	0.885507
0.837086	0.784951	0.914496
0.848055	0.857951	0.883556
0.891332	1.29653	0.782405
1.15664	0.920736	0.783269
0.95197	1.12118	0.533917
1.28612	0.75669	0.917421
0.796754	1.90782	0.789724
0.809057	0.851536	0.798014
1.09394	1.0679	0.811154
1.05443	0.931296	0.864089
0.863143	0.717361	0.934956
1.01811	0.868526	1.04862
0.745172	0.814155	0.809966
1.05147	0.821125	0.926935
1.08035	0.893296	0.654087
0.952912	0.846509	0.799624
1.19546	0.967073	0.700606
1.10242	0.720147	0.866048
0.99219	0.701025	0.691705
0.812793	1.05592	0.755116
0.895285	1.03843	0.886304
1.06387	0.807474	0.885229
0.850816	0.79142	0.905301
0.696017	0.802196	0.851088
0.784477	0.814225	0.756463
0.749158	1.2815	1.06354
0.761781	0.711133	0.653861
0.785726	0.861405	0.604489
0.901006	0.816906	0.851578
0.760147	1.26074	0.725103
1.00788	0.631545	0.675542
0.787791	0.839709	0.898502
1.14995	0.63094	0.987783
0.808722	0.809631	0.784079
0.899031	0.980219	0.703001
1.19897	1.15017	0.792174
0.850727	0.908619	0.725965
1.05399	0.803774	0.787242
0.90895	0.750022	0.758016
0.936591	0.688018	0.872045
0.786737	0.902025	0.807882
1.01258	0.673613	1.01928
0.902355	1.13627	0.912285
0.914879	1.10507	0.870518
1.08195	0.518913	0.883437
0.881228	1.07792	0.674664
0.685385	0.804192	0.754881
0.958741	0.68264	0.860321
1.08843	1.03015	0.641896
1.07905	0.841974	0.924274
0.851431	0.767352	0.540347
0.998802	0.686645	0.678181
1.0894	0.700779	0.984028
1.00081	0.855913	0.766993
0.861225	0.688234	0.957667
0.768741	0.496045	0.894018
0.741515	0.633005	0.80742
0.770889	0.847096	0.828245
1.18315	0.910119	0.567692
0.848712	0.65057	0.550722
0.638157	0.75986	0.659575
0.785278	0.716391	0.55332
0.979955	0.737234	0.836191
0.592755	0.877822	0.788358
0.697478	0.68998	0.842859
1.01691	0.649684	1.08944
0.929283	1.0095	0.695045
1.04209	0.756302	0.657554
1.05092	0.82659	0.768459
0.941064	0.85034	0.761357
0.6312	0.625278	1.10876
1.63003	1.08116	0.900221
1.20105	0.735099	0.532203
0.8239	0.884217	0.780941
1.08322	0.853331	0.773491
0.839344	0.609123	0.710567
0.957898	0.633443	0.968635
0.86882	1.40263	0.703227
0.982077	0.958571	0.845001
0.72163	0.799049	0.697212
0.869805	1.0665	0.63217
0.902677	0.682409	0.91923
0.740856	0.712693	0.914772
0.938908	0.571342	0.890679
1.62798	0.870437	0.855523
0.577958	0.638323	0.761916
0.755279	0.709717	0.919465
1.00363	1.14531	0.790318
0.924856	0.951443	1.0453
0.641462	0.758763	0.705569
0.71169	0.624314	0.723029
0.95577	0.897279	0.85159
0.970281	1.3485	0.75656
1.30051	0.539594	0.819078
0.848271	0.714801	0.787548
0.867711	1.16822	0.721843
0.754372	0.802424	0.953149
0.898434	1.04973	0.682497
0.812519	0.726176	0.789948
1.26789	0.643166	0.606144
0.764365	0.95863	0.914088
0.823658	0.664011	0.889678
1.12546	0.541215	0.88689
0.942015	0.767256	0.75138
0.767867	0.495734	0.78032
0.793516	0.717547	0.600909
1.01479	0.717561	0.936703
1.15008	0.695121	0.87639
0.712504	0.607589	0.798958
1.1909	0.887906	0.82026
0.811147	0.832832	0.895992
0.916905	0.769601	0.714226
0.903631	0.720926	0.81939
0.649916	0.741926	0.703343
1.1294	0.804107	0.72004
1.11224	0.964028	0.777264
0.779833	0.860599	0.806021
0.706132	0.87148	0.887821
0.843566	0.689154	0.808933
0.855706	0.969084	0.79066
1.18706	0.787884	0.720213
0.780675	0.990768	0.672596
0.739761	0.662743	0.925521
1.1032	0.664613	0.659643
1.25247	0.651847	0.772411
0.670719	0.599585	0.682141
0.868617	0.762484	0.920468
0.602656	0.800887	0.675519
0.881183	0.856769	0.788363
0.845791	0.904708	0.810979
0.853215	1.0687	0.80276
0.833469	0.8256	0.720856
1.17872	0.956296	0.797741
0.938637	1.09345	0.716349
0.671355	0.711494	0.842198
1.06692	0.755849	0.651109
0.619994	1.18465	0.725026
0.924707	0.795918	0.979995
0.974364	1.1644	0.84147
0.876834	0.568521	0.714929
0.811618	0.78607	0.771369
1.22049	0.907163	0.775546
0.830971	0.895738	1.10678
0.743072	0.712442	0.909761
0.758569	0.82453	0.863404
0.532621	0.771587	0.852208
0.966924	0.825648	0.827922
0.865629	1.02326	0.991312
1.0707	0.913948	0.894913
0.737637	1.14912	0.908546
0.929454	0.794079	0.956219
0.700937	0.713686	0.75107
0.480654	0.857526	0.859997
0.927742	1.02865	0.845619
0.651766	1.0378	0.768476
0.916942	0.987714	0.701422
0.613594	0.597527	0.824754
0.823602	0.48751	0.721845
0.860465	0.867903	0.646067
0.957986	1.05486	0.762833
0.81994	0.808865	0.706179
0.610278	0.678732	0.661805
0.6506	0.954832	1.09234
0.702937	0.920075	0.709632
0.776845	0.729303	0.662928
0.604532	1.13081	0.94194
0.920809	0.702671	0.642724
0.721006	0.94657	0.874688
0.620744	0.714461	0.78458
0.720381	0.81645	0.543072
0.890043	0.876731	0.91444
0.897427	1.08376	0.735933
1.06581	0.927285	0.817569
1.07904	1.36906	0.913278
0.51715	0.851542	0.729446
0.702379	1.06897	0.731309
0.78602	0.791224	0.823122
0.641599	1.00922	0.776313
0.622063	0.835986	0.681189
0.629008	0.51054	0.959029
0.577111	0.821025	0.913468
0.789496	0.936329	0.555191
0.707725	0.624161	0.573133
0.701092	0.796198	0.784912
0.844269	1.09703	0.932356
0.799628	0.8964	0.376676
0.962524	0.704471	0.556559
0.841625	0.963128	0.743017
0.692913	0.861813	0.788827
0.58843	0.735609	0.763885
0.696484	0.897502	0.888525
0.700587	0.834701	0.798985
1.01321	0.741996	0.62123
0.793643	0.805042	0.538264
0.555615	0.945885	0.676985
1.11635	0.789308	0.687294
0.793741	0.750592	0.798507
0.842152	0.806363	0.73605
1.06383	0.45427	0.68412
0.99732	0.983074	0.741849
0.695002	0.990495	0.799376
0.660231	1.18351	0.981128
0.230036	0.966158	0.778234
0.90534	1.08331	0.757964
0.90289	0.789141	0.549404
0.680849	0.96956	0.661185
0.804919	0.789556	0.68748
0.738152	0.708777	0.487692
0.707121	1.17527	0.716332
0.6126	0.800766	0.669226
0.775812	0.719759	0.83432
0.888095	0.783963	0.638738
0.761669	0.710095	0.523856
0.800394	0.719673	0.730753
0.552427	0.816956	0.679518
0.922232	0.766918	0.574011
0.608195	0.864957	0.687795
0.871011	0.6538	0.712645
0.899436	0.722132	0.67145
0.765422	0.959368	0.664351
0.772607	0.992204	0.674844
0.659342	0.950899	0.615684
0.664604	0.984904	0.736214
0.762967	0.908805	0.627015
0.616773	0.887816	0.597851
0.819562	1.04437	0.881441
0.566792	0.702297	0.501994
0.623598	1.23805	0.582676
0.709878	0.783952	0.550927
0.645946	0.645191	0.594747
0.774121	0.794699	0.724804
0.709738	0.791377	0.707062
0.880437	0.850746	0.734341
0.59127	0.818703	0.870231
0.670103	0.93325	0.586474
0.77015	0.935225	0.875531
0.61436	0.719888	0.601586
0.723027	0.734882	0.534892
0.672369	1.02531	0.563756
0.787623	0.790757	0.249405
0.822305	1.04965	0.905125
0.560576	0.739119	0.839523
0.624913	0.867486	0.842134
0.806888	0.802049	0.544712
0.730423	0.858094	0.663929
0.204107	1.12123	0.933977
0.669072	0.727754	0.786806
0.809444	0.821365	0.552893
0.877514	0.719217	0.785871
0.911033	0.768248	0.651467
0.540042	1.00124	0.678885
0.866097	0.829811	0.722853
0.608355	0.67828	0.956719
0.781412	0.676958	0.695082
0.608147	0.973699	0.601944
0.813773	0.866153	0.72754
0.794551	0.965668	0.763207
0.65162	0.624575	0.585184
0.835175	0.657228	0.592855
0.946503	0.865795	0.743494
0.633621	0.765709	0.593985
0.811972	0.852404	0.686035
0.600313	0.753699	0.720171
0.60674	0.683645	0.756146
0.741368	1.0623	0.689311
0.804624	1.17777	0.834071
0.640402	0.775768	0.542663
0.903258	0.75957	0.67926
0.562037	0.894662	0.614849
1.06136	0.829404	0.819493
0.817809	1.04434	0.663113
0.584485	0.871101	0.586397
0.721763	0.915958	0.853708
0.635319	0.783652	0.633047
0.770271	0.949624	0.835826
0.918459	0.823178	0.770673
0.683664	0.967411	0.601666
0.390951	0.781224	0.725777
0.822144	1.09427	0.729751
0.913099	0.724009	0.506239
0.764243	0.746946	0.651854
0.94426	0.971251	0.578193
0.691637	0.675498	0.581709
0.816849	0.990797	0.634276
0.683655	0.987735	0.625711
0.715343	1.07307	0.550624
0.845321	1.0965	0.550116
0.649145	0.575975	0.659903
0.694775	0.832237	0.832121
0.703723	0.803056	0.601531
0.737266	1.31233	0.622053
0.846949	1.03417	0.560509
0.780279	0.973011	0.521466
0.763987	1.0488	0.724341
0.593037	0.784998	0.785805
0.551568	0.739425	0.815144
0.818634	0.87573	0.724941
0.740323	0.680692	0.657036
0.786901	0.833317	0.731181
0.627911	0.997826	0.734368
0.646282	0.577538	0.617129
0.928149	0.807273	0.705615
0.69464	0.863039	0.538896
0.66988	0.906388	0.471854
0.636972	0.723174	0.68323
0.705725	1.01454	0.756899
0.75321	0.754394	0.516978
0.570615	0.751555	0.526647
1.18621	1.07726	0.581245
1.07932	0.975873	0.934888
0.81454	0.883196	0.510083
0.812237	0.715866	0.587448
0.742223	0.982295	0.536802
0.533688	0.722898	0.808757
0.788071	0.654005	0.606641
0.611105	0.615516	0.576392
0.552224	1.07245	0.614679
0.940409	0.783203	0.613286
0.767498	0.684376	0.702791
0.755175	0.788124	0.792194
0.633232	0.748149	0.515191
0.711628	0.901951	0.644079
0.788445	0.766578	0.57094
0.976786	1.07387	0.710426
0.746519	0.751604	0.33915
0.679039	0.938047	0.573276
0.781969	0.958712	0.625403
0.577006	0.752246	0.475629
0.516754	1.08468	0.66655
1.3277	0.802899	0.674973
1.10841	1.04514	0.529923
1.05745	0.868261	0.563855
1.1502	0.953923	0.797792
0.860775	0.715095	0.662494
1.19149	0.636874	0.641251
1.13247	0.947788	0.651459
1.11371	0.795212	0.542537
0.987285	0.712149	0.78112
1.13541	0.969437	0.413345
0.995718	0.837379	0.49488
0.948222	0.860784	0.497192
1.14264	0.867691	0.750306
1.51557	1.03955	0.590508
0.935524	0.600695	0.503878
0.929747	0.78	0.574406
1.18139	0.910169	0.451193
1.07824	0.720475	0.617568
1.0995	0.876979	0.746653
1.11233	0.65636	0.503173
1.19672	1.01652	0.540001
0.893806	0.715153	0.706986
1.06156	1.03883	0.716129
0.971881	0.914553	0.669177
1.05352	0.921422	0.772875
0.950844	0.901887	0.395794
0.964636	1.1217	0.682944
1.10467	1.18567	0.572152
1.18417	1.19196	1.11918
1.06322	1.65206	0.804898
1.23697	2.01865	0.709226
1.03779	1.0686	0.910983
1.0925	1.31255	0.471931
0.709015	1.06711	0.885555
1.11939	1.30938	0.662743
1.22592	1.56344	0.625643
1.01176	1.20856	1.06368
1.06772	1.38914	0.755302
0.819164	1.48426	0.397498
1.07833	1.78201	0.975441
1.10284	1.08227	0.543041
0.875991	1.50531	0.751771
0.88462	1.44433	0.979617
1.11402	1.33028	0.656008
1.0447	1.38872	0.672236
1.34262	0.970609	0.776315
1.14915	1.15312	0.688
1.01022	0.91057	1.09543
1.2653	1.28383	0.613738
0.988973	1.13166	0.757101
1.20713	1.41539	0.822991
0.990176	1.04895	1.30591
1.13009	1.18812	1.57066
0.820272	1.3952	1.44303
0.978579	0.959711	2.14623
1.17586	1.22707	1.73307
0.833293	1.36901	1.92969
0.923661	1.54918	1.34024
1.06215	1.14807	1.93661
0.945071	1.4628	1.38841
0.845835	1.19958	1.98091
1.34754	0.971429	1.81061
1.04503	0.918014	1.5424
1.19423	1.28413	1.4925
0.942435	0.765643	1.74911
0.774424	1.29146	1.35302
0.730807	1.06937	1.27708
1.08163	0.958856	1.12956
1.02121	1.45154	1.53148
0.974963	1.29822	1.51508
0.972619	0.956308	2.06802
0.891886	1.61672	2.16857
0.904705	1.14726	1.78586
1.01579	1.10517	1.57733
1.13064	1.44434	1.57218
0.86001	0.933124	1.67511
1.29266	1.26369	1.73806
1.21165	1.25214	1.20235
1.073	1.21008	1.92494
0.965285	1.24401	1.56617
0.812739	2.27622	1.14706
1.0606	1.59451	1.52956
1.12758	1.16716	1.04363
0.994035	0.955736	1.83438
1.30174	1.41549	1.43616
0.774289	1.14188	1.38215
1.17876	1.3678	1.5396
0.832426	1.36182	1.51661
0.783578	0.803956	1.27601
1.01052	0.99661	1.30778
0.914241	0.830591	1.54226
0.939504	1.21011	1.32117
0.952905	0.860763	1.68102
1.02143	1.28876	1.90852
0.867323	0.991795	1.49291
0.916496	1.28605	1.56986
0.880047	0.93967	1.16075
0.893059	0.745088	1.39276
0.631094	1.3703	1.32088
0.908283	1.19042	1.09466
0.924619	1.13334	1.56203
1.00665	1.0875	1.23478
0.90991	0.830573	1.19401
1.1027	0.934373	1.45354
0.956935	0.934247	1.304
0.845667	0.999984	1.18381
0.977341	1.1948	1.16229
1.00228	0.942275	1.28875
1.02979	1.31952	1.38919
1.24282	1.29807	1.42451
1.0274	0.961976	1.33566
0.97488	0.685635	1.17179
0.978096	0.993422	1.1773
0.808693	1.15924	1.70713
0.734518	1.00364	1.33885
1.1776	1.29023	1.71001
0.990787	0.796659	1.40642
0.767365	1.29292	1.39234
0.815003	0.988381	1.32069
0.830805	1.31829	1.28437
0.850782	0.970042	1.1361
0.854654	1.14891	1.16985
0.897914	0.803985	1.5569
0.723721	1.4503	1.52356
1.02389	1.21821	1.27282
0.991525	1.41287	1.32416
1.11357	1.08953	1.55275
0.722804	0.835425	1.24534
1.1945	1.33348	1.58564
1.00009	1.63414	1.30941
0.858	0.911663	2.03727
0.634022	0.983834	1.94027
1.11823	1.01373	1.33911
0.865335	1.16123	1.3631
0.888536	1.61061	1.60645
1.0573	1.19677	1.59509
1.021	1.15909	1.21232
0.968342	1.3026	1.38367
1.01894	0.740968	1.22752
1.07436	1.08698	1.29779
1.01842	0.807886	1.15113
0.908716	1.44131	0.949092
0.865974	1.15866	1.24041
1.05722	1.12248	1.51762
0.933671	1.41433	1.30218
0.996001	1.42734	1.23823
1.01774	1.22772	0.959353
0.804058	1.2758	1.08167
1.0518	1.28535	1.67397
0.904942	0.888219	1.17996
1.07733	0.800397	1.2357
0.927465	0.924705	1.31214
0.694677	1.23794	1.09894
0.828732	1.04102	1.29689
0.761598	1.2742	1.64226
0.881045	0.984595	1.48897
0.814434	0.945765	1.25857
0.960883	1.42992	1.25044
0.925752	1.25066	2.49867
0.748988	1.26111	1.36047
0.850258	1.14351	1.03527
1.02331	0.996461	1.30215
0.704478	1.06797	1.21366
0.860078	1.33584	1.51365
1.03286	1.27659	1.58965
0.874618	0.994171	1.15226
0.92499	1.15116	0.927857
0.790655	1.18208	1.87593
0.784127	1.06515	1.26798
0.932097	1.23595	1.30954
0.951231	1.09906	1.22276
0.826347	1.13269	1.12954
0.741246	0.929649	1.14111
0.797191	1.1855	1.32586
0.624792	0.880491	1.6921
0.772774	0.736502	1.86041
1.09078	1.36849	1.38724
0.66459	1.05715	1.17942
0.750323	0.961068	1.11253
0.91751	0.868894	1.16546
0.821164	1.38339	1.26763
1.04078	1.05465	1.17534
0.749307	0.877065	1.13371
0.914365	1.00241	1.35183
1.05261	0.860672	2.23917
0.884909	1.44794	1.37733
0.908327	1.29579	1.29672
1.09384	1.18986	0.973531
0.923279	1.09733	1.35947
0.881205	1.49913	1.41748
1.13915	1.33486	1.07512
0.771655	0.788195	1.58046
0.93513	1.32799	1.1666
0.83507	1.02069	1.47511
0.903149	1.11223	1.13395
0.705201	1.25386	2.06056
0.888878	0.962669	1.53716
0.745657	0.906013	1.48482
0.585981	1.2067	1.07071
1.08936	1.02458	1.21131
0.697632	1.224	1.51116
1.06168	0.781357	0.99667
0.578433	0.841741	1.32542
1.06727	0.836004	1.30448
1.18218	0.919452	1.03197
0.731612	1.22068	1.45938
0.890974	0.906762	1.73712
0.709975	1.51008	1.20871
0.735519	1.07545	1.03429
1.06065	0.876138	1.02083
0.84656	1.22364	1.05512
0.886844	0.942097	1.57416
1.19113	1.12987	1.05209
0.897048	1.04992	0.895729
0.838263	0.980637	1.53665
0.837402	0.78864	1.67474
0.788566	1.15485	0.909074
0.637901	0.87287	1.06736
0.675892	0.673143	0.985979
0.89409	0.968754	1.56246
0.971818	1.2174	1.31762
0.758203	0.722785	1.28873
0.638859	1.23748	1.03449
1.17919	0.767587	0.979322
0.884509	1.2499	0.876819
0.82736	1.14354	0.88225
1.0774	1.10688	1.18049
0.587309	1.08197	1.08825
0.898447	1.32027	1.08368
0.79465	0.923634	1.11544
0.885547	0.901754	0.964883
0.995524	1.38252	1.09778
0.811765	1.05826	1.14191
0.944768	0.845058	1.27903
0.964396	1.22245	1.70036
0.446298	1.36484	1.24404
0.627703	0.870581	1.05294
0.676802	1.12966	1.10093
1.35368	0.97551	0.988679
0.65646	0.883926	1.34394
1.09869	0.684687	0.889658
0.830423	1.12818	1.03585
1.41175	0.967229	1.25138
0.951148	2.19472	1.34204
0.920595	0.902604	0.743047
0.686131	1.16837	1.09771
0.819996	1.07574	1.19645
1.16082	0.997939	1.42122
0.783229	0.980137	0.979309
0.795649	1.24044	0.884036
0.793336	0.905437	1.09797
1.00015	1.04031	1.59534
0.618275	1.1335	0.961773
0.725305	1.02714	0.770652
0.789878	1.03585	1.15836
1.17066	0.880705	1.24915
0.831685	1.34039	1.45594
0.846048	1.05063	1.18447
0.98203	0.685813	1.64174
0.638602	0.959349	1.11723
0.867104	0.673601	0.868888
0.672941	0.814462	1.44293
0.999759	1.18302	1.09132
0.7602	0.713336	1.92445
0.747999	1.0285	1.66678
0.927152	1.21742	1.38556
0.768655	0.81941	1.53619
0.736433	1.16819	0.846642
0.899714	0.876204	0.9941
0.81238	0.757841	1.18699
0.794635	0.777022	1.62974
0.796121	0.82727	0.993807
0.938581	0.943913	1.11432
0.732125	0.610203	0.84615
0.707576	1.04392	1.15944
0.878762	1.01878	0.993204
0.800063	0.728069	1.02541
1.14417	0.93694	0.966031
0.747754	0.850295	1.37893
0.665326	1.32461	0.773465
0.729863	1.03117	1.17428
1.02512	1.57789	1.21507
0.720354	0.955086	1.14902
0.964489	0.959495	1.09337
0.788041	1.25545	0.90335
1.23162	0.965217	0.736559
0.651784	1.0332	0.992491
0.771245	0.608304	0.824229
0.858037	0.93194	1.0329
0.834164	0.826899	1.19138
1.06683	0.727933	1.34363
1.00902	0.517014	0.770852
0.705182	0.786874	0.889765
0.987438	0.808938	1.04563
0.774341	0.751442	0.790712
0.84164	0.81121	2.65667
0.786138	0.987385	0.662477
0.735889	0.764466	0.687746
0.668859	0.947892	1.22565
0.807938	0.741475	0.919795
0.740266	0.860812	1.2669
0.95565	1.30327	0.854992
0.728959	1.04629	1.11082
0.710933	0.834498	0.970781
0.558112	1.19688	0.6649
0.912759	0.682367	0.75122
0.675756	0.926654	1.05133
0.839743	0.839404	0.936867
0.888192	0.941514	1.12127
0.651542	1.15328	0.806297
0.908901	1.52196	0.967269
0.655945	1.27821	0.947443
0.904256	0.99238	0.775306
0.731767	1.0859	1.20557
0.845907	0.823927	0.884372
0.868294	0.999545	1.39937
0.577066	1.11667	0.878851
0.941709	1.41578	0.938398
1.00275	0.914116	0.774019
0.658157	1.13565	0.774225
0.797377	1.15254	0.565013
0.794559	0.86983	1.04677
1.05302	0.861015	0.852604
0.950738	0.599233	0.711305
0.481449	0.963519	1.01296
0.671193	0.680888	0.816724
0.673829	0.777256	0.658296
0.843682	1.06505	0.772613
0.60898	0.936606	0.759635
0.735269	0.998395	1.13788
0.70141	1.26075	1.0722
0.695325	1.02534	0.818691
0.826693	0.902028	1.34345
0.787965	0.813262	0.70516
0.813656	0.859826	0.958854
0.644544	0.72345	1.10048
0.85157	0.943538	0.841592
0.87569	0.998031	1.08597
0.522741	1.10241	1.08502
0.755089	0.593851	0.815347
0.836061	1.04537	1.00474
0.660799	1.13141	0.667073
0.569959	1.12103	1.05695
0.943555	1.03042	0.719843
0.693192	0.696302	0.898905
1.11891	0.954554	0.792939
0.603663	0.736776	1.01482
0.863697	1.07062	0.726649
0.976563	1.15754	0.838445
0.773987	1.15258	2.01611
0.661283	1.15729	0.936475
0.872948	1.02485	1.05727
0.920332	0.594126	0.704814
1.17725	1.04063	0.843201
0.75409	0.904904	0.748091
1.05519	0.831922	0.833409
0.842303	1.01771	1.07572
0.713258	0.947607	0.785958
0.915048	0.928	1.30906
0.574451	0.580821	0.783421
0.972296	0.736869	0.915839
0.584815	1.12162	0.859091
0.763497	0.665272	1.4518
0.754094	1.2607	0.797193
0.647552	0.781766	0.802312
0.909171	0.983069	1.03785
1.14223	0.899122	0.89053
1.1623	1.04262	1.3405
0.809848	0.972187	1.00235
0.607441	0.946206	1.33453
0.725845	0.836166	0.928472
0.733104	0.92836	0.999905
0.549516	1.1283	1.02116
0.999927	0.687844	0.618923
0.595542	0.818573	0.669004
0.931521	0.775779	1.05941
0.692067	0.892701	1.15447
0.650587	0.582184	0.630475
0.762479	1.07635	0.730305
0.643127	0.554014	1.28422
0.751035	0.904139	1.07087
0.831173	1.04289	0.935156
0.678402	0.903267	0.8988
0.592399	1.09301	1.08934
0.861651	1.17245	1.07893
0.729885	0.889535	1.13147
0.750091	0.703181	0.701177
0.74449	1.17731	0.798669
0.728591	1.11437	0.638645
0.567133	0.902198	0.782433
0.596632	0.632198	0.574922
0.5893	1.32193	0.603968
0.631119	0.974029	0.604712
0.65357	0.791575	0.777724
0.715892	0.84757	1.02325
0.826958	0.621449	0.733592
0.653996	1.03932	0.712698
0.644275	0.782643	0.94705
0.719985	1.08968	0.902997
0.724331	0.880947	0.932464
0.827926	0.835105	0.648457
0.59251	1.02474	1.19399
0.773422	0.996045	0.701874
0.637309	0.866129	0.725527
0.6579	0.749776	0.672673
0.621031	0.808501	1.15961
0.630043	0.674579	1.04756
0.971087	0.875539	1.15557
0.890467	1.00198	0.538333
0.798185	0.819944	1.64917
0.587152	0.876095	0.665037
0.780074	0.672919	0.66726
0.766806	1.44137	1.11286
0.670788	1.01358	1.32861
0.733437	1.38675	0.865975
0.60384	1.22909	0.749281
0.75756	0.728874	0.648645
0.575574	0.979398	0.69504
0.678381	0.906275	0.767363
0.761081	0.716742	1.41378
0.623024	0.842352	0.791777
0.670049	0.884987	0.480525
0.964456	0.83667	0.990274
0.676663	0.950533	0.820181
0.744418	0.889423	0.611102
0.894427	0.826446	0.743303
0.552091	0.741626	0.927278
0.548728	0.784612	0.68114
0.634567	1.14907	0.714255
0.894082	0.925137	0.565477
0.524349	0.752439	0.743165
0.638243	1.02094	0.922186
0.696824	1.02753	0.858436
0.837515	0.913924	1.03904
0.572854	0.782167	0.53187
0.783374	0.851886	0.587869
0.706913	0.765317	0.897712
0.578245	0.598562	0.644019
0.860336	1.20453	1.2274
0.297028	0.7256	0.979035
0.560094	0.641319	1.14396
0.856855	0.832507	1.04339
0.709809	0.601048	1.00602
0.557906	0.723798	0.748712
0.776728	0.930969	0.584836
0.618284	0.808322	0.679267
0.76846	0.742337	0.87562
0.655755	0.857749	0.664969
0.709278	0.845088	0.946155
0.462663	0.88423	1.06785
0.742543	0.588331	0.957537
0.608285	0.835708	0.615101
1.14693	0.649785	0.587168
0.813296	0.680299	0.962003
0.832458	0.585778	0.955849
0.773837	0.702217	0.575653
0.584575	1.1102	0.757366
0.907697	0.697376	0.469636
0.768915	1.00526	0.874935
0.803549	0.96625	0.748249
0.834354	0.916483	0.635635
0.746474	0.81231	0.921933
0.780602	0.680562	0.742013
0.794574	1.17055	1.07631
0.760648	0.740803	1.61325
0.779763	1.17419	1.5918
0.833886	0.913365	1.57129
0.815787	0.617738	1.37232
0.803282	0.660499	1.47942
0.767198	0.456834	1.98793
0.767199	0.81885	1.53319
0.720599	0.700008	1.52973
0.572696	1.00616	1.10223
0.949058	0.996816	1.85939
0.759602	0.836843	1.77608
0.786017	0.526996	1.99463
0.794986	0.577882	1.63999
0.847396	0.857734	1.42421
0.894261	0.662538	1.70972
0.967775	0.731052	1.48926
1.01125	0.60318	1.53297
0.662431	0.769099	2.1053
0.900978	0.941517	1.59932
0.746965	0.778485	1.40674
0.763495	1.00538	1.64262
0.881175	0.845699	1.73389
0.842289	0.749444	1.64744
0.882881	0.822528	1.83558
0.696962	0.63554	1.93781
0.953458	1.1893	1.45506
0.905105	0.62515	1.70906
0.971318	0.780998	1.53865
0.9496	0.640725	1.92264
0.728079	0.807555	1.50523
0.82213	1.14673	1.4434
0.90713	0.758745	1.73029
0.728942	0.790803	1.9333
0.899249	0.598583	1.60413
0.872817	1.02203	1.72069
0.855268	0.693937	1.57174
0.989542	0.585848	1.23472
0.880598	0.69247	1.45812
0.693504	0.834887	1.5476
0.730069	0.704743	2.03146
0.878055	0.585922	1.52139
0.77168	1.02979	1.43853
0.71248	1.0502	1.68204
0.737392	0.837314	1.66563
0.825002	0.6188	1.7199
0.759044	0.653781	1.8272
0.813502	0.712351	1.59441
0.957274	0.713618	1.57127
0.800556	1.33506	1.66178
0.654486	1.10813	1.49201
0.725764	0.753572	1.30046
0.808204	0.688823	1.3806
0.768008	0.709389	1.90908
0.858024	0.827882	1.2392
0.686521	0.633624	1.23524
1.07106	0.637525	1.35293
0.632183	0.62056	1.42921
0.89839	0.935765	1.18802
1.01191	1.17152	1.64183
0.992109	0.844051	1.52333
0.696622	0.703143	1.44594
0.835675	0.741439	1.46726
0.89439	0.667664	1.52946
0.948707	0.96017	1.59949
0.791516	0.738768	2.08592
0.91693	0.902772	1.971
0.771252	0.795988	1.26475
0.720218	0.816251	1.55424
0.93912	0.789413	1.5978
0.771121	0.714904	1.89881
0.814909	0.968534	1.41537
1.09571	0.546734	1.1939
0.711319	0.601551	1.59934
0.759192	0.726826	1.57774
0.648277	0.721764	1.20507
0.817513	0.77785	1.46711
0.671763	0.654161	1.38861
0.753033	0.699812	1.2063
0.897026	0.757391	1.12282
0.706755	0.869958	1.55947
0.601151	1.98878	1.71142
0.609454	1.48642	1.26303
1.08836	1.18761	1.25504
0.817098	1.78673	1.65821
0.815077	1.04761	1.43726
0.867368	0.975842	1.45169
0.614335	1.38523	1.65851
1.09412	0.663334	1.25482
0.81446	1.34597	1.38375
0.853285	1.30257	1.46838
0.901596	1.39397	1.28788
0.767008	1.33493	1.43548
0.651753	1.01483	1.11457
0.651492	1.28311	1.33273
0.703441	1.28204	1.02701
1.01673	1.76764	1.53978
1.08074	1.66941	1.63484
0.702517	1.15533	1.20965
0.622966	1.30661	1.30568
1.08668	1.71476	1.42896
0.886704	1.32464	1.05124
0.795306	1.14545	0.636544
0.952634	1.32212	0.899269
0.727542	1.25941	1.28811
0.922875	1.40786	1.24472
0.951393	1.56704	1.36913
0.669624	1.89651	1.43935
0.625114	1.40661	1.69282
0.668083	1.23817	1.2509
0.98548	1.30091	1.12361
0.619135	1.65856	1.26383
0.704355	1.00402	0.96742
0.907524	1.55106	0.885351
1.0106	1.22423	1.35195
0.800304	1.19747	1.15868
0.897624	1.1611	1.20605
0.778423	1.3868	0.887942
0.66426	1.25344	0.923233
0.64991	1.07983	1.43374
0.948041	1.95184	0.884548
0.819351	1.33256	1.10492
0.827974	1.52853	1.07921
0.757919	1.09016	0.828084
0.873974	1.51706	0.892199
0.734461	2.12978	1.07032
0.667269	2.15227	1.7557
0.858735	1.59798	0.976092
0.792155	1.30632	1.15724
0.685654	1.47543	1.43633
0.747596	1.46842	0.875063
0.943703	1.24669	1.14026
0.921259	1.98267	0.956925
0.86861	1.50957	1.02686
0.749858	1.76384	1.00505
0.916222	1.0613	1.33228
0.768547	1.80523	1.27929
0.880635	1.22835	0.919471
0.909498	1.81892	1.00146
0.758082	2.00071	1.32819
0.959678	1.05523	1.59108
0.779206	1.16554	0.98699
0.726572	1.36328	1.07826
0.851821	1.34442	0.971025
0.872458	1.40268	1.12753
0.674273	1.13882	0.929921
0.666073	1.08513	1.20345
0.675373	1.47656	1.32036
0.768834	1.20319	1.12567
0.759642	1.65529	1.18322
0.613859	0.932967	1.056
0.937949	1.41802	1.03204
0.821873	1.26582	0.919142
1.04398	1.8577	1.31693
0.93527	1.61823	0.858124
0.938921	1.19767	1.06949
0.77871	1.57289	1.01165
0.56708	1.20927	1.27274
0.743284	1.72422	1.09129
0.871936	1.28655	0.941712
0.755152	1.54522	1.16634
0.945747	1.36251	1.11754
0.985283	1.19092	0.696674
0.791056	1.16842	1.01497
0.81751	1.60143	1.12925
0.704869	0.926726	1.32327
0.671254	1.12647	1.98294
0.782328	1.47623	1.51708
0.682968	1.51394	1.06102
0.591502	1.4546	1.59319
1.00974	1.39881	1.52148
0.73212	0.9649	0.955586
0.673004	1.16662	1.16657
0.8709	1.49847	0.79195
0.767963	1.22555	1.0128
1.16596	1.75135	0.831859
0.954035	1.43816	1.46032
0.868648	1.35321	0.946012
0.974652	1.7602	1.07511
0.642155	1.14089	1.10048
0.928326	1.34647	1.00565
0.947534	0.994488	0.974084
0.955348	1.27999	0.973414
0.716233	1.33041	1.16902
0.661344	0.906543	0.983161
0.953714	1.06722	1.0063
0.792593	2.10171	0.81535
0.816161	0.455394	1.0062
0.619295	1.41834	0.693779
0.559615	1.14822	1.04361
0.831377	1.51722	1.20043
0.893189	1.46885	1.10735
0.658633	1.48182	1.13366
0.679741	1.01248	1.36453
0.857898	1.41021	1.90355
0.865667	0.814639	1.75809
0.695883	2.09816	1.00357
0.6324	1.52137	1.06548
0.568373	0.987856	1.69285
0.765359	0.912341	1.91626
1.06133	1.09254	1.36415
0.736978	1.25809	1.45597
0.608913	1.42644	1.00905
0.907091	1.44051	0.750852
0.736598	1.88136	0.950907
0.693224	1.09364	1.1704
0.917563	1.30301	0.945959
0.70346	1.43953	1.05521
0.852456	1.14379	1.23314
0.704706	1.34255	0.951307
0.802179	1.5578	0.99861
0.803292	1.62696	0.786748
0.962773	1.44589	1.75426
0.643976	1.44529	1.44282
0.787924	0.823486	0.771291
0.527828	1.0272	0.787054
0.803418	1.73333	0.900038
0.670011	1.16515	1.12368
0.700375	1.62006	1.17465
0.70569	1.10309	1.10345
0.910469	1.23584	1.21578
0.828191	1.50584	0.836959
0.75173	1.11554	0.871017
0.663977	1.18853	1.15394
0.769926	0.887095	1.12799
0.742492	1.24002	0.724365
0.817014	1.20766	1.33457
0.876934	1.52561	1.08214
0.638578	1.36396	1.28443
0.739755	0.983204	0.792384
0.597884	1.17529	1.17598
0.823981	0.986177	1.16114
0.828246	0.946864	0.965176
0.711259	1.32542	1.24379
0.525067	1.07875	1.21988
0.791475	0.917001	0.726297
0.815564	1.30675	0.728278
0.712353	0.991308	1.39656
0.833221	1.63895	1.15729
0.807913	1.39036	0.984399
1.08171	1.35859	1.36599
0.815777	0.868816	0.982327
0.721683	1.30277	1.0166
0.851942	0.797171	1.14116
0.591006	1.55348	0.888268
0.863367	0.931273	0.908224
0.453058	1.6041	0.981727
0.87095	0.982033	0.980201
0.95882	1.71866	1.12835
0.778442	1.39776	0.716252
0.778211	1.32477	0.72962
0.727314	0.936916	1.31508
1.04043	1.24278	1.33309
0.974515	1.0995	0.870003
0.672654	1.65434	1.1835
0.794268	0.985631	0.871163
0.83846	0.705212	0.832147
1.04854	1.18425	1.39779
0.501541	1.52421	1.1297
0.587481	1.14333	0.891517
0.711343	1.19864	1.23277
0.85828	1.34245	0.74867
0.757839	1.52421	1.33478
0.57915	1.00621	0.859889
0.563801	1.93703	1.12326
1.0083	1.07594	0.917958
0.685442	1.07224	1.07807
0.626	1.57349	1.0705
0.908564	1.22657	0.980174
0.885799	1.21959	0.675158
0.782835	1.21998	0.954036
0.8529	1.48698	1.31475
0.803886	1.49745	1.10974
0.720854	1.20792	0.952069
0.846976	1.37553	0.628918
0.666691	1.15617	1.00682
0.92977	1.09941	0.735379
0.880101	0.951244	0.714351
0.871002	1.69108	0.864904
0.686691	1.37975	0.931827
0.775597	1.16107	0.793311
0.749136	0.997418	0.886943
0.603608	1.27068	0.697698
0.716802	1.77025	0.688441
1.17205	1.44638	0.909108
0.599953	1.28617	0.931927
0.958839	0.873179	0.715802
0.927667	1.26988	1.02599
0.715815	1.13626	1.16893
0.854494	1.21847	1.12303
0.547645	0.949422	1.20145
0.64546	1.67625	0.943325
0.726339	1.51386	0.674607
0.941519	1.26582	0.689229
0.898903	1.03936	0.778585
0.674006	1.16282	0.843954
0.968847	0.880122	1.26643
0.768991	1.93023	0.611824
0.915939	1.41978	1.05933
0.790271	1.14037	0.704421
0.594424	1.64919	1.08096
0.582578	1.16539	1.10009
0.730116	1.21137	0.761404
0.767266	1.07633	0.861677
0.811706	0.978683	0.940287
0.93686	1.29821	0.987863
1.18107	1.15709	1.35454
0.759895	1.48039	1.09087
0.948462	1.54593	0.707252
0.788546	1.03884	1.06877
0.696896	1.51977	0.883654
0.770904	1.78766	0.914803
0.767609	1.24388	0.97935
0.740289	1.24626	0.877189
0.645243	1.02174	0.977332
0.578978	0.964956	1.09029
0.685315	1.23971	0.781989
0.883585	1.05004	0.885964
0.900217	0.813396	0.832814
0.697946	1.67621	1.02567
1.03048	0.910619	1.08778
1.1221	1.21931	0.962762
0.707656	0.900986	0.749554
0.564108	0.830871	0.850292
0.904345	0.906277	0.977503
0.798933	1.03026	0.976669
0.712552	1.36023	0.683553
0.854474	1.40736	1.13525
0.944928	1.15267	0.97728
0.617835	1.09718	1.01759
0.606377	1.08091	0.865232
0.614133	0.894243	0.726618
0.673234	1.12888	0.849042
0.784875	1.27739	0.723176
0.817399	1.01936	0.894972
0.824918	0.782407	0.793455
0.796783	1.25938	1.10364
0.798421	1.36037	0.897533
0.811364	0.788355	1.00538
0.893252	1.27634	0.930472
0.660014	1.36365	0.775196
0.652007	0.874664	1.18941
0.788076	1.31507	0.714602
0.809582	1.17446	1.20525
0.769461	1.16089	0.965333
1.18057	1.26685	0.77241
0.633393	1.45868	1.13916
0.614465	1.16334	0.738358
0.593766	0.762777	0.977293
0.547262	1.11256	1.00781
0.834855	1.01059	0.742345
0.953141	1.3849	0.829559
0.857444	0.525045	1.07652
0.848236	1.07577	0.976989
0.813096	0.915656	1.05851
0.807648	0.960757	0.741072
0.656219	1.32214	1.00776
0.634883	1.26087	0.708611
0.665921	0.792215	0.822968
0.820475	0.995046	0.929683
0.828381	0.983013	1.14556
0.624326	1.31466	1.35684
0.654479	0.848228	1.16845
1.01855	0.968533	0.780903
0.609988	0.633348	0.843026
0.767981	0.918545	0.789253
0.537625	0.766621	1.97423
0.880416	0.12992	1.00268
0.627434	1.12069	1.1103
0.587158	1.17278	1.18206
0.864648	1.15231	0.90763
0.944105	0.795624	0.778582
0.951741	0.945869	0.970051
0.909511	0.989463	0.874352
0.842561	0.959642	1.16204
0.688876	1.01164	0.882535
0.796784	1.13821	1.44552
1.09345	0.937848	0.649717
0.731622	1.61252	0.740353
0.679703	0.294008	0.686264
0.943451	1.42129	1.05441
0.849473	0.951533	0.983706
0.706908	0.908404	0.704222
0.57565	1.53298	1.18901
0.811086	1.50195	1.01431
0.790899	0.958527	0.925657
0.539749	1.23728	0.880084
0.776202	1.02396	0.907586
1.02498	0.816038	0.818597
0.46209	0.976928	0.75428
0.833178	1.21783	0.931553
0.824249	1.351	0.855053
0.868505	0.841207	1.05413
0.715502	1.54241	0.901687
0.745029	0.824975	0.808204
0.761381	1.32566	0.950864
0.889329	0.866333	0.812067
0.846887	1.49408	0.959635
0.672597	0.89021	0.929937
0.837942	1.66023	1.14737
0.850845	1.38421	0.671753
0.903731	0.725202	0.868524
0.63757	0.932897	1.12197
0.625993	0.764485	0.603846
0.73489	1.26547	1.1849
0.627747	1.28208	0.938743
0.626707	1.02139	1.05977
0.817314	0.778332	0.759679
0.774156	0.779094	0.978106
0.684817	1.02199	0.88253
0.89692	1.35649	0.782242
0.652305	0.959279	1.04902
0.616718	0.704247	0.679809
0.578842	1.2492	1.27464
0.777288	0.826987	0.929005
0.797954	1.07446	1.20383
0.586447	1.42375	1.11253
0.640235	1.16415	1.04648
0.859352	1.03229	0.994577
0.949968	0.978265	0.924388
0.545344	0.920326	0.841578
0.867128	1.2132	0.896083
0.758954	0.989538	0.771232
0.802389	0.873473	0.986197
0.547032	1.17913	1.12837
0.868994	1.03311	1.02747
0.67386	0.711775	0.981569
0.632539	0.723452	1.09764
0.771958	0.839058	0.740557
0.625226	0.710204	1.055
0.696459	1.49218	0.733692
0.667117	0.731082	1.12516
0.59162	0.838904	0.947841
0.628198	1.17199	0.795592
0.569606	0.763699	1.13309
0.913794	0.693766	0.781443
0.840812	1.06267	0.888521
0.775342	0.844121	1.17546
0.80831	1.08708	0.922888
0.573727	0.932302	0.755782
0.845569	1.19637	1.06811
0.672981	0.92981	0.718764
0.607455	0.925972	1.12663
0.674655	1.06348	1.68389
1.03769	1.01624	1.28421
0.55505	0.908326	1.00108
0.816093	0.672296	1.10398
0.602773	0.783419	1.4611
0.771978	1.18517	1.51963
0.877132	0.395649	1.15638
0.947443	1.02697	1.01188
0.537777	1.10767	1.6707
0.911082	1.31849	0.996801
0.557066	0.745469	1.56193
0.939965	0.779468	1.47194
0.789129	1.13242	1.87042
0.861897	0.840842	1.03871
0.657104	0.812012	1.29854
0.606211	1.69933	1.54548
0.570016	1.12974	1.40032
0.901439	1.2677	1.28766
0.775974	0.768442	1.3144
0.685593	0.827812	1.41225
0.55895	0.939005	1.51423
0.599786	0.980623	1.45455
0.916909	1.03305	1.53134
0.809382	0.885547	1.20661
1.07533	0.790005	1.52992
0.866567	0.932188	1.11261
0.589743	1.06421	1.03527
0.607334	0.831826	1.31201
0.690055	0.806576	1.48408
0.518918	0.735664	1.22363
0.646884	0.851079	1.40886
0.662495	0.873995	1.77527
0.528422	1.15247	0.953716
0.630331	0.75611	1.16742
0.760136	0.875567	1.5418
0.609854	0.676643	1.18836
0.724687	1.01021	1.2235
0.918428	0.854985	1.11307
0.659682	0.997013	1.46595
0.723737	1.11443	1.35542
0.555086	0.804893	1.09688
0.780804	1.09608	1.38597
0.59106	1.25302	1.31191
0.70999	0.861597	1.1323
0.630823	0.684273	1.14144
0.646664	0.918032	1.291
0.699409	1.1676	1.05826
0.809964	1.13717	1.20564
0.820526	1.04509	1.1805
0.598314	0.58883	0.976023
0.735012	0.736254	1.62562
0.724673	1.10545	1.12139
1.32555	1.46888	1.19735
0.65855	0.854417	0.39057
0.614344	0.838072	1.3024
[truncated: 591 more rows]

## Sheet: Extended Data Fig. 6c
Extended Data Fig. 6c	Day 5-7 Bayesian (bmrs) Coefficients
	A83-01			ActA-25
	Coefficient	Upper CI	Lower CI	Coefficient	Upper CI	Lower CI
CER1+	-1.17	-0.58	-1.86	0.34	0.63	0.03
Hypoblast	0.03	0.14	0.08	-0.08	0.03	-0.2
Epiblast	-0.23	-0.08	-0.4	0.1	0.22	-0.03

## Sheet: Extended Data Fig. 6d
Extended Data Fig. 6d	Day 7-9 Bayesian (bmrs) Coefficients
	A83-01			ActA-25
	Coefficient	Upper CI	Lower CI	Coefficient	Upper CI	Lower CI
CER1+	-3.27	-1.94	-5.14	0.42	0.71	0.12
Hypoblast	-0.13	0	-0.27	-0.25	-0.13	-0.38
Epiblast	0.04	0.19	-0.12	-0.17	-0.01	-0.33

## Sheet: Extended Data Fig. 6f
Extended Data Fig. 6f	E3.5+48h Epiblast
Control																				Act-A																				A83-01
31	23	28	8	68	21	38	12	11	31	48	33	16	44	23	65	35	31	36		23	34	31	37	32	78	4	23	28	17	33	26	37								40	23	29	28	23	19	19	8	18	38
[truncated: 3 more columns]

## Sheet: Extended Data Fig. 6g
Extended Data Fig. 6g	E3.5+48h PrE/VE
Control																				Act-A																				A83-01
58	31	43	60	53	55	55	9	38	44	40	56	80	50	60	77	76	52	47		32	64	31	44	34	79	9	20	48	44	80	46	42								52	44	67	35	32	30	25	31	31	48
[truncated: 3 more columns]

## Sheet: Extended Data Fig. 6i
Extended Data Fig. 6i	% Egg cyclinder and DVE/AVE
Egg Cyclinder				DVE/AVE
Control	Act-A	A83-01		Control	Act-A	A83-01
100	100	75		12.5	37.5	0

## Sheet: Extended Data Fig. 6j
Extended Data Fig. 6j	E5.0+36h Epiblast length
Control										Act-A										A83-01
127.596	76.898	98.544	74.615	71.821	152.937	166.259	140.447			128.61	157.64	82.649	143.389	58.247	167.658	85.092	44.28			26.547	41.327	49.636	68.52	26.549	54.119

## Sheet: Extended Data Fig. 6k
Extended Data Fig. 6k	E5.0+36h Epiblast Area
Control										Act-A										A83-01
14267	4959	8893	8773	6153	13202	9772	10683			8333	10045	4845	11375	9165	10231	7408	6286			3080	3730	9981	6264	6331	6943

## Sheet: Extended Data Fig. 6m
Extended Data Fig. 6m	Day 5-7 GATA3+
Control	A83	ActA-25
27	311	125
869	184	75
311	579	88
601	468	209
400	519	138
636	535	281
49
586

## Sheet: Extended Data Fig. 6n
Extended Data Fig. 6n	Day 5-7 GATA3+/GATA6-
Control	A83	ActA-25
26	43	107
94	82	72
91	158	71
98	111	39
106	277	48
159	107	271
31
22

[truncated: 4 more sheets: Extended Data Fig. 6o, Extended Data Fig. 6p, Extended Data Fig. 6q, Extended Data Fig. 6s]
