# Supplementary material for: Distinct pathways drive anterior hypoblast specification in the implanting human embryo
Source: Nat Cell Biol. 2024 Mar 5;26(3):353–65. doi: 10.1038/s41556-024-01367-1 (PMC10940163; doi:10.1038/s41556-024-01367-1)
Supplement: Supplementary file 12 — Statistical source data. [file 41556_2024_1367_MOESM12_ESM.xlsx]

## Sheet: Extended Data Fig. 7d
Extended Data Figure 7d	Individual relaive pSMAD1.5.9 levels per embryo
Segregating
	ICM																																								TE
1266	25.0269	31.2695	19.553	24.9941	36.2466	24.0029	16.5693	19.1875	25.3252	28.3213																															110.617	49.4873	162.663	132.492	45.4434	63.8759	104.099	50.9537	57.608
1136	27.7714	18.7122	18.2508	16.9479	12.9154	11.9265																																			32.6818	36.066	43.2326	29.1616	11.0802	22.3687	22.8357	22.4663	26.5585
617	16.37	18.6825	33.4732	16.3267	18.0408	34.8604	35.253	22.1876	30.7836	22.1338	7.76214																														28.5537	7.57654	11.0547	21.2734	24.205	23.5287	23.4901	32.4623	17.5589
1272	24.8655	22.693	22.9309	22.1052	15.6386	11.3624	10.8658	18.4104																																	76.7359	53.8364	23.2268	39.734	41.2373	33.0402	68.0842	31.919	67.7818
Segregated
	EPI																																										HYPO
1148	20.2342	20.4062	20.3771	17.795	20.4908	20.3352	22.0421	20.2682	21.8477	19.3669	24.2069	16.3238	16.5045	17.4483	21.2317	16.6952	18.4679	14.9581	13.5236	15.9778	16.3713	23.2883	15.9151																				20.2237
1179	17.8222	17.3721																																									21.3812	24.0418	17.2614	25.3831	33.0086
1024	18.1015	9.639	15.241	8.91972	9.17661																																						113.777	21.7769	19.0771	36.4758	15.7277	27.143	22.8821
1026	28.4411	18.0826	17.2248																																								59.6278	37.1232	31.0528	34.6537	28.7398	29.2685	29.6741
659	17.697	19.0195	19.0039	18.262	19.7889	18.2587	18.1371	16.2085	18.7085	18.5405	17.4556	22.0328	18.7343	20.9546	17.8367	18.3198	20.858	18.1002	18.0563	20.478	20.1088	15.5677	17.6504	14.8802	17.5414	18.2045	20.9435	16.6047															32.6851	28.0981	52.0896	63.242	19.6796	15.1588	22.06
660	10.1395	7.38296	5.46601	5.09163																																								13.9039	6.9891	7.33565	9.88282	16.0794	8.9921
675	3.64507	3.95115	5.0329	3.09263	2.73705	2.48805	2.83383	2.2995	2.26965	2.45771	1.57185																																	12.2423	8.50775	28.4205	19.4362	11.4816	6.72063
775	13.7782	14.7668																																									35.2459	25.6327	25.7937	25.6083	32.9923	35.3929
1117	28.5377	26.7505	48.9278	20.3511																																							22.0637	15.5453	17.9085	5.98055
Day 7
	EPI																																																HYPO
1287	9.5367	6.40327	4.76576	4.49765	3.95973																																												5.67429
1288	21.9761	19.1074	21.0477	21.091	16.3739	17.5915	16.0801	14.9149	14.6756	18.7438	21.7567	11.4034	14.7304	12.2993	25.9385	17.5758	15.5471	31.339	18.2171	24.1998	42.5628	14.3808	15.8504	20.7968	16.3102	8.83366																							39.997
1293	13.7578	15.509	14.7831	14.0209	13.8826	16.01	14.7853	14.9117	14.8353	12.1365	13.6111	14.9939	15.417	10.5724	12.8314	11.2792	12.7805	14.1449	14.4723	12.0781	11.5649	15.3483	14.9901	13.829	12.9517	12.7529	13.4306	11.513	9.33308	8.46934	9.38531	11.0575																	41.2949
1327	3.46349	3.45472	3.40993	2.85244	2.70489	2.27726	2.15789	4.34556	5.47479	5.51421	4.29056	2.956	3.35499	3.88983	4.87477	4.82109	2.97552	1.18494	1.15481																														4.12818
1336	5.77986	5.31688	5.59673	5.26275	4.94129	6.23645	4.79704	3.11535	2.73607	4.98827	4.01466	7.90126	3.0484	4.97386																																			8.85489
1341	9.57107	11.216	12.05	9.52924	11.1868	12.0702	13.3483	12.1649	10.6761	11.9542	9.17073	12.1229	9.27282	10.4262	10.3981	10.3185	7.77087	9.95566	11.0867	8.02365	11.7712	10.1996	9.33982	7.84129	7.36168	8.45846	10.7605	6.28348	6.00983	7.37365	6.13373	6.44936	5.81416	7.63225	5.11375	6.54698	5.93769	7.4451	6.65084	3.7003	5.23145	5.98912	4.28586	3.99901	6.71485	3.92178	4.09109	3.75545	7.6352
1107	2.13686	2.53061	2.5054	1.94118	1.69028																																												17.4438
1104	6.82954	5.64388	4.24642	3.59108	4.94383	3.03661	4.13691	4.68004	3.67151	4.12287																																							9.07074
1125	6.6844	5.7695	8.43617																																														43.4062
Day 9
	EPI																																								HYPO
1227	4.90092	3.51707	3.4005																																						31.9398	15.76	14.5535	5.73513	7.13383	14.1125	12.1255	17.3467	20.3615
1239	33.1001	33.0694	31.0153	25.3544	22.6042	38.8843	24.9034	43.6941	23.0822	27.9445	40.0583	34.7352	25.903	23.2519	16.2205	28.538	50.7215	23.578	25.5751	25.4258																					56.3401	59.5121	31.1723	36.0716	33.7977	37.1394	24.6747	24.7173	47.8954
1278	2.8042	2.62313	3.6006																																						9.11466	21.7817	8.28657	2.01692	6.1255	5.15139	1.95219	1.55677	1.16633
1311	6.81836	11.7146	7.10579																																						7.66639	8.3978	5.48259	4.67761	13.1633	3.00398	2.45916	2.5747	2.76394
[truncated: 47 more columns]

## Sheet: Extended Data Fig. 7f
Extended Data Fig. 7f	Relative pSMAD1.5.9 at E3.5
ICM	TE
11.786	10.44
12.358	11.449
13.577	11.662
12.078	10.858
10.874	9.548
6.27	9.502
6.368	10.724
6.351	10.028
7.193	10.683
6.158	10.711
6.574	6.776
7.383	11.912
6.315	7.523
5.777	6.82
6.748	8.155
4.999	6.613
6.343	6.746
7.384	8.679
6.011	6.093
6.391	5.937
7.281	6.704
6.998	6.507
7.961	6.999
6.414	7.665
6.983	7.562
6.087	7.423
8.267	8.619
5.443	6.714
5.807	6.601
6.712	6.33
6.121	6.1
5.453	5.08
3.764	6.739
5.355	6.636
4.95	5.306
3.791	6.409
4.857	5.011
4.537	3.209
4.159	4.924
5.261	4.836
5.489	4.868
6.832	4.454
4.029	5.016
4.007	3.602
3.022	5.166
2.941	3.021
3.893	3.668
3.7	2.59
3.248	1.236
4.173	4.668
4.214	4.238
3.463	4.098
3.469	4.089
3.834	3.677
4.457	2.455
3.283	4.3
4.797	4.094
4.106	4.145
4.557	2.673
4.553	3.483
5.173
4.046
4.174
3.875
3.293
3.96
3.058
3.363
3.079

## Sheet: Extended Data Fig. 7g
Extended Data Fig. 7g	Relative pSMAD1.5.9 at E4.5
EPI	PrE	TE
10.377	10.113	10.409
11.77	10.469	13.318
10.081	12.015	13.044
10.127	12.968	9.646
9.252	9.906	10.597
10.809	10.807	7.482
46.299	10.885	7.277
35.546	50.837	29.731
42.488	41.523	37.353
36.653	41.985	38.291
35.896	36.239	41.041
41.86	53.112	26.595
41.661	41.05	30.224
25.4	29.896	28.086
26.446	26.666	24.113
24.664	33.727	15.275
25.725	29.113	19.712
19.547	25.748	18.503
18.342	31.145	15.891
17.549	26.095	19.118
17.8	19.028	14.381
17.901	22.642	21.002
	17.07	25.664
	22.577	17.491
	19.772	19.876
	24.049	21.208
		15.59
		18.475

## Sheet: Extended Data Fig. 7h
Extended Data Fig. 7h	Relative pSMAD1.5.9 at E5.5
EPI	VE	EXE
9.088	15.105	9.344
10.554	19.149	8.546
9.601	19.537	10.859
9.531	20.172	10.802
9.198	27.135	10.406
10.341	38.561	10.82
10.823	37.368	12.48
10.464	34.264	7.02
11.382	15.096	12.748
11.931	16.612	9.429
9.943	15.84	9.373
14.859	13.69	9.037
15.31	42.351	9.513
15.554	32.268	8.975
13.449	29.349	9.627
11.377	23.446	10.125
11.208	9.376	9.706
9.732	23.308	10.501
11.925	35.919	12.02
12.598	36.527	16.557
16.459	55.601	11.624
33.552	26.356	14.677
22.121	34.329	9.952
14.371	29.941	14.381
14.373	53.95	11.314
13.063	50.191	13.538
14.146	32.346	11.65
12.175	26	13.644
11.083	12.03	10.975
12.107	13.549	11.253
9.381	10.473	13.982
10.071	16.011	11.151
12.623	12.699	10.646
10.916	15.765	8.901
13.909	14.738	8.476
16.383	13.851	8.41
16.976	15.045	8.332
19.414	5.758	11.057
10.203	12.323	9.599
16.12	25.395	8.464
16.284	31.436	7.585
15.24	31.151	10.162
11.641	45.317	11.199
11.812	27.099	8.436
10.271	21.826	6.301
9.893	57.703	6.686
9.18	36.501	6.81
8.733	39.248	5.557
10.06	29.539	5.285
12.999	26.615	6.37
12.418	19.812	6.725
12.94	20.262	6.542
12.416	19.425	9.136
10.267	17.439	8.907
9.6	17.147	9.365
7.847	18.953	10.466
8.272	16.751	10.088
7.437	41.953	9.17
6.898	37.015	12.57
6.74	23.416	10.214
7.456	58.255	9.475
6.37	31.851	8.688
6.882	32.641
6.61	48.678
6.531	23.999
8.147	25.524
13.119	30.823
11.949	17.628
9.479	24.345
8.791	17.973
9.934	18.718
8.829	11.414
7.38	11.925
7.053	13.37
6.485	8.833
8.628	12.955
11.452	12.321
8.598	26.523
13.787	12.206
10.616	13.474
12.787	32.654
12.745	6.062
	25.542
	18.687
	21.612
	10.928
	14.835
	12.074
	11.869
	11.576
	12.631
	18.18
	43.372
	25.684
	19.965
	19.076
	10.151
	23.764
	18.765
	29.444
	18.311
	37.31

## Sheet: Extended Data Fig. 7i
Extended Data Fig. 7i	Relative pSMAD1.5.9 at E5.75
EPI	VE	EXE
30.314	31.247	10.916
20.569	22.316	12.721
22.376	29.639	16.902
20.836	30.706	9.98
22.753	39.935	9.738
26.256	46.783	9.396
25.701	56.317	10.952
23.525	57.744	13.685
22.434	69.669	10.795
22.977	87.607	11.172
25.332	73.995	13.711
27.024	77.292	14.16
25.239	67.159	12.131
24.692	63.364	15.759
25.695	53.174	6.639
25.663	85.925	10.618
22.017	93.677	8.043
24.548	70.042	8.579
24.436	55.309	5.969
29.77	40.49	7.482
10.64	23.097	5.54
12.063	34.301	5.327
14.316	39.897	5.909
11.224	11.755	6.647
13.205	14.612	5.69
12.528	19.712	6.92
12.82	15.38	6.826
11.853	39.343	22.466
11.318	20.223	15.286
9.11	8.562	12.266
8.728	32.286	5.022
8.531	54.426	4.517
10.853	31.009	5.645
8.443	43.274	6.398
10.442	40.639	7.787
8.578	29.713	8.029
9.687	25.612	5.895
13.419	26.027	6.325
13.55	11.614	5.669
12.631	11.159	7.064
12.565	13.522	10.41
15.116	16.161	9.26
16.337	11.396	6.239
18.069	13.745	5.369
16.057	9.021	6.358
16.493	3.051	6.473
21.92	6.206	6.286
17.011	9.567	6.617
16.777	12.784	5.484
17.595	7.663	7.405
15.875	10.61	7.348
13.572	10.469	5.946
15.882	25.66	6.379
15.752	34.418	12.917
16.108	31.793	9.582
5.976	25.265	9.793
9.102	37.716	7.732
7.566	24.265	8.463
7.913	34.781	7.292
6.873	36.974	6.197
7.247	60.039	6.303
7.779	27.939	7.357
9.183	17.314	7.393
8.766	38.83	9.14
8.087	27.253	15.393
10.233	14.174	7.029
9.125	11.754	8.052
10.49	22.435	7.457
9.57	40.261	7.938
11.25	35.686
11.759	52.212
16.563	17.985
16.395	32.772
13.678	30.119
9.653	50.091
7.805	43.011
9.662	10.288
9.687	22.627
8.845	24.735
8.741	14.81
11.977	27.598
10.142	21.28
11.017	21.85
10.934	12.652
11.308	14.255
10.554	14.718
12.014	13.007
9.599	10.268
10.302	17.21
10.479	11.252
11.627	9.856
7.938	16.44
11.087	20.691
	27.554
	9.32
	10.226
	29.897
	18.85
	46.372
	42.409
	35.881
	27.485
	56.003
	39.979
	53.045
	44.701
	60.418
	53.734
	62.69
	29.415
	14.533
	43.288
	22.352
	23.532
	19.043
	16.225
	24.992
	14.088
	17.434
	15.579
	13.074

## Sheet: Extended Data Fig. 7j
Extended Data Fig. 7ij	Relative pSMAD1.5.9 in Epiblast over time
E3.5	E4.5	E5.5	E5.75
11.786	10.377	9.088	30.314
12.358	11.77	10.554	20.569
13.577	10.081	9.601	22.376
12.078	10.127	9.531	20.836
10.874	9.252	9.198	22.753
6.27	10.809	10.341	26.256
6.368	46.299	10.823	25.701
6.351	35.546	10.464	23.525
7.193	42.488	11.382	22.434
6.158	36.653	11.931	22.977
6.574	35.896	9.943	25.332
7.383	41.86	14.859	27.024
6.315	41.661	15.31	25.239
5.777	25.4	15.554	24.692
6.748	26.446	13.449	25.695
4.999	24.664	11.377	25.663
6.343	25.725	11.208	22.017
7.384	19.547	9.732	24.548
6.011	18.342	11.925	24.436
6.391	17.549	12.598	29.77
7.281	17.8	16.459	10.64
6.998	17.901	33.552	12.063
7.961		22.121	14.316
6.414		14.371	11.224
6.983		14.373	13.205
6.087		13.063	12.528
8.267		14.146	12.82
5.443		12.175	11.853
5.807		11.083	11.318
6.712		12.107	9.11
6.121		9.381	8.728
5.453		10.071	8.531
3.764		12.623	10.853
5.355		10.916	8.443
4.95		13.909	10.442
3.791		16.383	8.578
4.857		16.976	9.687
4.537		19.414	13.419
4.159		10.203	13.55
5.261		16.12	12.631
5.489		16.284	12.565
6.832		15.24	15.116
4.029		11.641	16.337
4.007		11.812	18.069
3.022		10.271	16.057
2.941		9.893	16.493
3.893		9.18	21.92
3.7		8.733	17.011
3.248		10.06	16.777
4.173		12.999	17.595
4.214		12.418	15.875
3.463		12.94	13.572
3.469		12.416	15.882
3.834		10.267	15.752
4.457		9.6	16.108
3.283		7.847	5.976
4.797		8.272	9.102
4.106		7.437	7.566
4.557		6.898	7.913
4.553		6.74	6.873
5.173		7.456	7.247
4.046		6.37	7.779
4.174		6.882	9.183
3.875		6.61	8.766
3.293		6.531	8.087
3.96		8.147	10.233
3.058		13.119	9.125
3.363		11.949	10.49
3.079		9.479	9.57
		8.791	11.25
		9.934	11.759
		8.829	16.563
		7.38	16.395
		7.053	13.678
		6.485	9.653
		8.628	7.805
		11.452	9.662
		8.598	9.687
		13.787	8.845
		10.616	8.741
		12.787	11.977
		12.745	10.142
			11.017
			10.934
			11.308
			10.554
			12.014
			9.599
			10.302
			10.479
			11.627
			7.938
			11.087

## Sheet: Extended Data Fig. 7k
Extended Data Fig. 7k	Relative pSMAD1.5.9 in PrE/VE over time
E3.5	E4.5	E5.5	E5.75
11.786	10.113	15.105	31.247
12.358	10.469	19.149	22.316
13.577	12.015	19.537	29.639
12.078	12.968	20.172	30.706
10.874	9.906	27.135	39.935
6.27	10.807	38.561	46.783
6.368	10.885	37.368	56.317
6.351	50.837	34.264	57.744
7.193	41.523	15.096	69.669
6.158	41.985	16.612	87.607
6.574	36.239	15.84	73.995
7.383	53.112	13.69	77.292
6.315	41.05	42.351	67.159
5.777	29.896	32.268	63.364
6.748	26.666	29.349	53.174
4.999	33.727	23.446	85.925
6.343	29.113	9.376	93.677
7.384	25.748	23.308	70.042
6.011	31.145	35.919	55.309
6.391	26.095	36.527	40.49
7.281	19.028	55.601	23.097
6.998	22.642	26.356	34.301
7.961	17.07	34.329	39.897
6.414	22.577	29.941	11.755
6.983	19.772	53.95	14.612
6.087	24.049	50.191	19.712
8.267		32.346	15.38
5.443		26	39.343
5.807		12.03	20.223
6.712		13.549	8.562
6.121		10.473	32.286
5.453		16.011	54.426
3.764		12.699	31.009
5.355		15.765	43.274
4.95		14.738	40.639
3.791		13.851	29.713
4.857		15.045	25.612
4.537		5.758	26.027
4.159		12.323	11.614
5.261		25.395	11.159
5.489		31.436	13.522
6.832		31.151	16.161
4.029		45.317	11.396
4.007		27.099	13.745
3.022		21.826	9.021
2.941		57.703	3.051
3.893		36.501	6.206
3.7		39.248	9.567
3.248		29.539	12.784
4.173		26.615	7.663
4.214		19.812	10.61
3.463		20.262	10.469
3.469		19.425	25.66
3.834		17.439	34.418
4.457		17.147	31.793
3.283		18.953	25.265
4.797		16.751	37.716
4.106		41.953	24.265
4.557		37.015	34.781
4.553		23.416	36.974
5.173		58.255	60.039
4.046		31.851	27.939
4.174		32.641	17.314
3.875		48.678	38.83
3.293		23.999	27.253
3.96		25.524	14.174
3.058		30.823	11.754
3.363		17.628	22.435
3.079		24.345	40.261
		17.973	35.686
		18.718	52.212
		11.414	17.985
		11.925	32.772
		13.37	30.119
		8.833	50.091
		12.955	43.011
		12.321	10.288
		26.523	22.627
		12.206	24.735
		13.474	14.81
		32.654	27.598
		6.062	21.28
		25.542	21.85
		18.687	12.652
		21.612	14.255
		10.928	14.718
		14.835	13.007
		12.074	10.268
		11.869	17.21
		11.576	11.252
		12.631	9.856
		18.18	16.44
		43.372	20.691
		25.684	27.554
		19.965	9.32
		19.076	10.226
		10.151	29.897
		23.764	18.85
		18.765	46.372
		29.444	42.409
		18.311	35.881
		37.31	27.485
			56.003
			39.979
			53.045
			44.701
			60.418
			53.734
			62.69
			29.415
			14.533
			43.288
			22.352
			23.532
			19.043
			16.225
			24.992
			14.088
			17.434
			15.579
			13.074

## Sheet: Extended Data Fig. 7l
Extended Data Fig. 7l	Relative pSMAD1.5.9 in TE/ExE over time
E3.5	E4.5	E5.5	E5.75
10.44	10.409	9.344	10.916
11.449	13.318	8.546	12.721
11.662	13.044	10.859	16.902
10.858	9.646	10.802	9.98
9.548	10.597	10.406	9.738
9.502	7.482	10.82	9.396
10.724	7.277	12.48	10.952
10.028	29.731	7.02	13.685
10.683	37.353	12.748	10.795
10.711	38.291	9.429	11.172
6.776	41.041	9.373	13.711
11.912	26.595	9.037	14.16
7.523	30.224	9.513	12.131
6.82	28.086	8.975	15.759
8.155	24.113	9.627	6.639
6.613	15.275	10.125	10.618
6.746	19.712	9.706	8.043
8.679	18.503	10.501	8.579
6.093	15.891	12.02	5.969
5.937	19.118	16.557	7.482
6.704	14.381	11.624	5.54
6.507	21.002	14.677	5.327
6.999	25.664	9.952	5.909
7.665	17.491	14.381	6.647
7.562	19.876	11.314	5.69
7.423	21.208	13.538	6.92
8.619	15.59	11.65	6.826
6.714	18.475	13.644	22.466
6.601		10.975	15.286
6.33		11.253	12.266
6.1		13.982	5.022
5.08		11.151	4.517
6.739		10.646	5.645
6.636		8.901	6.398
5.306		8.476	7.787
6.409		8.41	8.029
5.011		8.332	5.895
3.209		11.057	6.325
4.924		9.599	5.669
4.836		8.464	7.064
4.868		7.585	10.41
4.454		10.162	9.26
5.016		11.199	6.239
3.602		8.436	5.369
5.166		6.301	6.358
3.021		6.686	6.473
3.668		6.81	6.286
2.59		5.557	6.617
1.236		5.285	5.484
4.668		6.37	7.405
4.238		6.725	7.348
4.098		6.542	5.946
4.089		9.136	6.379
3.677		8.907	12.917
2.455		9.365	9.582
4.3		10.466	9.793
4.094		10.088	7.732
4.145		9.17	8.463
2.673		12.57	7.292
3.483		10.214	6.197
		9.475	6.303
		8.688	7.357
			7.393
			9.14
			15.393
			7.029
			8.052
			7.457
			7.938
